# Supplementary material for: Regulated Ire1-dependent mRNA decay requires no-go mRNA degradation to maintain endoplasmic reticulum homeostasis in S. pombe
Source: eLife journal article supplement (doi:10.7554/elife.29216), 2017-09-25
Supplement: supp [file elife-29216-supp-v2.zip]

Archive with 12 entries (12 files):
- elife_poa_e29216_Figure_1_figure_supplement_1.ai
- elife_poa_e29216_Figure_3_figure_supplement_1.ai
- elife_poa_e29216_Supplementary_File_4.txt
- elife_poa_e29216_Figure_3_figure_supplement_3.ai
- elife_poa_e29216_Supplementary_File_1.xls
- elife_poa_e29216_Transparent_Reporting_File.pdf
- elife_poa_e29216_Supplementary_File_3.xlsx
- elife_poa_e29216_Supplementary_File_2.xlsx
- elife_poa_e29216_Figure_4_figure_supplement_1.ai
- elife_poa_e29216_Figure_2_figure_supplement_1.ai
- elife_poa_e29216_Figure_6_figure_supplement_1.ai
- elife_poa_e29216_Figure_3_figure_supplement_2.ai
