# Supplementary material for: Regulated Ire1-dependent mRNA decay requires no-go mRNA degradation to maintain endoplasmic reticulum homeostasis in S. pombe
Source: eLife journal article supplement (doi:10.7554/elife.29216), 2017-09-25
Supplement: supp [file elife-29216-supp-v2.zip › elife_poa_e29216_Supplementary_File_1.xls]

## Sheet: pombe library.txt
number	Plate	Row	gene name	function	growth	categorie			stdev	two standard deviation
1742	5	9	SPBC28F2.10c	SPBC28F2.10c kap1 chromatin remodeling complex subunit Ngg1	-0.701479	sensitive genes				zscore-2
1851	5	14	SPAC23H3.05c	SPAC23H3.05c swd1 COMPASS complex subunit Swd1	-0.688732	sensitive genes
1584	5	2	SPAC1B1.04c	SPAC1B1.04c poly(A)-specific ribonuclease complex subunit	-0.646104	sensitive genes				104	sensitive genes
288	1	12	SPAC167.01	SPAC167.01 ppk4 serine/threonine protein kinase Ppk4	-0.629442	sensitive genes				76	resistant genes
977	3	9	SPBC13G1.02	SPBC13G1.02 mannose-1-phosphate guanyltransferase	-0.626369	sensitive genes
312	1	13	SPBP8B7.22	SPBP8B7.22 erd2 HDEL receptor	-0.601672	sensitive genes				overall	2346
1722	5	8	SPCC594.05c	SPCC594.05c COMPASS complex subunit	-0.599517	sensitive genes
1428	4	12	SPAC25H1.05	SPAC25H1.05 meu29 sequence orphan	-0.578986	sensitive genes
745	2	16	SPBC1105.11c	SPBC1105.11c hht3 histone H3 h3.3	-0.571577	sensitive genes
554	2	8	SPBC32F12.02	SPBC32F12.02 rec14 recombination protein Rec14	-0.559098	sensitive genes
721	2	15	SPAC1782.05	SPAC1782.05 phosphotyrosyl phosphatase activator homolog	-0.549573	sensitive genes
1656	5	5	SPAC15A10.05c	SPAC15A10.05c mug182 YjeF family protein	-0.534632	sensitive genes
1456	4	13	SPAC4G8.13c	SPAC4G8.13c prz1 transcription factor Prz1	-0.51891	sensitive genes
1776	5	10	SPAC22F8.02c	SPAC22F8.02c pvg5 PvGal biosynthesis protein Pvg5	-0.514686	sensitive genes
1519	4	16	SPBC354.08c	SPBC354.08c DUF221 family protein	-0.51044	sensitive genes
2167	6	11	SPBC16G5.15c	SPBC16G5.15c fkh2 fork head transcription factor Fkh2	-0.507972	sensitive genes
1130	3	16	SPAC1F7.08	SPAC1F7.08 fio1 iron transport multicopper oxidase Fio1	-0.502938	sensitive genes
2554	7	11	SPAC13G6.14	5 SPAC13G6.14 aps1 diadenosine 5',5'''-p1,p6-hexaphosphate h	-0.497494	sensitive genes
1145	3	16	SPCC550.03c	SPCC550.03c RNA helicase involved in mRNA catabolism	-0.497055	sensitive genes
210	1	9	SPAP8A3.05	SPAP8A3.05 ski complex interacting GTPase Ski7	-0.489408	sensitive genes
699	2	14	SPBC12C2.02c	SPBC12C2.02c ste20 sterility protein Ste20	-0.48562	sensitive genes
746	2	16	SPBC336.01	SPBC336.01 fbh1 DNA helicase I	-0.482753	sensitive genes
1784	5	11	SPBC651.10	SPBC651.10 nse5 Smc5-6 complex non-SMC subunit Nse5	-0.470352	sensitive genes
2764	8	4	SPBC17G9.10	SPBC17G9.10 rpl1102 60S ribosomal protein L11	-0.460191	sensitive genes
2357	7	3	SPBC1921.06c	3 SPBC1921.06c pvg3 beta-1,3-galactosyltransferase"	-0.442169	sensitive genes
2015	6	4	SPAC630.04c	SPAC630.04c sequence orphan	-0.434394	sensitive genes
1648	5	5	SPAC27E2.07	SPAC27E2.07 pvg2 galactose residue biosynthesis protein Pvg	-0.433442	sensitive genes
1009	3	11	SPCC1919.03c	SPCC1919.03c AMP-activated protein kinase beta subunit	-0.423681	sensitive genes
1782	5	11	SPBC211.06	SPBC211.06 gfh1 gamma tubulin complex subunit Gfh1	-0.423052	sensitive genes
2421	7	5	SPAC31A2.13c	SPAC31A2.13c sft1 SNARE Sft1	-0.42189	sensitive genes
265	1	12	SPBPB8B6.04c	SPBPB8B6.04c grt1 transcription factor Grt1	-0.421306	sensitive genes
2230	6	13	SPBC342.01c	SPBC342.01c alg6 glucosyltransferase Alg6	-0.420794	sensitive genes
1989	6	3	SPCC613.03	SPCC613.03 conserved fungal protein	-0.417742	sensitive genes
2730	8	2	SPBC56F2.10c	SPBC56F2.10c alg5 dolichyl-phosphate beta-glucosyltransfera	-0.41623	sensitive genes
1963	6	2	SPAC1952.05	SPAC1952.05 gcn5 histone acetyltransferase Gcn5	-0.414981	sensitive genes
1968	6	2	SPAC589.10c	SPAC589.10c ribomal-ubiquitin fusion protein Ubi5	-0.404909	sensitive genes
1307	4	7	SPBC3E7.12c	SPBC3E7.12c chr1 chitin synthase regulatory factor Chr1	-0.394713	sensitive genes
2110	6	8	SPAC29B12.06c	SPAC29B12.06c rcd1 RNA-binding protein Rcd1	-0.393823	sensitive genes
1173	4	1	SPBC1271.10c	SPBC1271.10c membrane transporter	-0.392974	sensitive genes
3050	8	16	SPAC1805.07c	SPAC1805.07c dad2 DASH complex subunit Dad2	-0.390141	sensitive genes
324	1	14	SPAC17C9.07	SPAC17C9.07 alg8 glucosyltransferase Alg8	-0.388904	sensitive genes
1466	4	14	SPBC17D1.05	SPBC17D1.05 sequence orphan	-0.385857	sensitive genes
658	2	12	SPBC609.03	5 SPBC609.03 WD repeat protein, human IQWD1 family"	-0.38335	sensitive genes
1658	5	6	SPCC364.06	SPCC364.06 nap1 nucleosome assembly protein Nap1	-0.382004	sensitive genes
1771	5	10	SPBC3B8.07c	SPBC3B8.07c dsd1 dihydroceramide delta-4 desaturase	-0.37904	sensitive genes
1002	3	10	SPBC4F6.06	SPBC4F6.06 kin1 microtubule affinity-regulating kinase Kin1	-0.378555	sensitive genes
1817	5	12	SPBC29A10.06c	SPBC29A10.06c conserved fungal protein	-0.376105	sensitive genes
1082	3	14	SPAC1A6.05c	SPAC1A6.05c triacylglycerol lipase	-0.37589	sensitive genes
1943	6	1	SPCP31B10.05	SPCP31B10.05 tyrosyl-DNA phosphodiesterase	-0.37564	sensitive genes
3004	8	14	SPAC458.06	SPAC458.06 phosphoinositide binding protein	-0.375283	sensitive genes
1341	4	8	SPCC417.07c	SPCC417.07c mto1 MT organizer Mto1	-0.370105	sensitive genes
1725	5	8	SPBC902.06	SPBC902.06 mto2 MT organizer Mto2	-0.368053	sensitive genes
3007	8	14	SPCC16C4.01	SPCC16C4.01 sif2 Sad1 interacting factor 2	-0.366549	sensitive genes
971	3	9	SPCC24B10.08c	SPCC24B10.08c histone acetyltransferase complex subunit Ad	-0.365102	sensitive genes
1645	5	5	SPBC18E5.07	SPBC18E5.07 sequence orphan	-0.364194	sensitive genes
1465	4	14	SPBC18E5.11c	SPBC18E5.11c edc3 enhancer of mRNA decapping Edc3	-0.363155	sensitive genes
1592	5	3	SPBC405.04c	SPBC405.04c ypt7 GTPase Ypt7	-0.360592	sensitive genes
722	2	15	SPAC2H10.01	SPAC2H10.01 transcription factor	-0.360242	sensitive genes
2511	7	9	SPBC3H7.05c	SPBC3H7.05c sequence orphan	-0.357931	sensitive genes
3070	8	16	SPAC4F10.04	1 SPAC4F10.04 protein phosphatase type 2A, intrinsic regula	-0.356518	sensitive genes
1256	4	5	SPAC13A11.04c	SPAC13A11.04c ubp8 ubiquitin C-terminal hydrolase Ubp8	-0.35636	sensitive genes
2935	8	11	SPCC4B3.08	SPCC4B3.08 C-terminal domain kinase I (CTDK-I) gamma subun	-0.352086	sensitive genes
702	2	14	SPBC3H7.13	SPBC3H7.13 FHA domain protein Far10	-0.348057	sensitive genes
839	3	3	SPBC1734.12c	2 SPBC1734.12c alg12 dolichyl pyrophosphate Man7GlcNAc2 alph	-0.347482	sensitive genes
311	1	13	SPAC57A10.14	SPAC57A10.14 sgf11 SAGA complex subunit Sgf11	-0.345676	sensitive genes
526	2	6	SPCC11E10.08	SPCC11E10.08 rik1 silencing protein Rik1	-0.345142	sensitive genes
2282	6	16	SPBC15D4.12c	SPBC15D4.12c mug98 sequence orphan	-0.343195	sensitive genes
2137	6	10	SPCC1020.06c	SPCC1020.06c tal1 transaldolase	-0.342982	sensitive genes
914	3	7	SPAC4F10.02	SPAC4F10.02 aspartyl aminopeptidase	-0.342818	sensitive genes
808	3	2	SPBC21C3.14c	SPBC21C3.14c sequence orphan	-0.339429	sensitive genes
2458	7	7	SPAC13C5.04	SPAC13C5.04 glutamine amidotransferase	-0.339109	sensitive genes
1867	5	14	SPBC651.03c	SPBC651.03c gyp10 GTPase activating protein Gyp10	-0.338923	sensitive genes
2481	7	8	SPBC409.17c	SPBC409.17c DUF1769 family protein	-0.33815	sensitive genes
1448	4	13	SPAC1805.15c	SPAC1805.15c pub2 ubiquitin-protein ligase Pub2	-0.337911	sensitive genes
2384	7	4	SPCC364.03	SPCC364.03 rpl1702 60S ribosomal protein L17	-0.33725	sensitive genes
2074	6	7	SPAC16E8.05c	SPAC16E8.05c mde1 sequence orphan	-0.335976	sensitive genes
1640	5	5	SPBC418.01c	SPBC418.01c his4 imidazoleglycerol-phosphate synthase	-0.335921	sensitive genes
753	2	16	SPBC1778.03c	SPBC1778.03c NADH pyrophosphatase	-0.335139	sensitive genes
1083	3	14	SPBC4.05	SPBC4.05 mlo2 zinc finger protein Mlo2	-0.334338	sensitive genes
1612	5	4	SPCC594.04c	SPCC594.04c steroid oxidoreductase superfamily protein	-0.333089	sensitive genes
267	1	12	SPCC16C4.11	SPCC16C4.11 pef1 Pho85/PhoA-like cyclin-dependent kinase Pe	-0.331977	sensitive genes
2257	6	15	SPAC2E1P5.03	SPAC2E1P5.03 DNAJ domain protein Erj5	-0.330229	sensitive genes
544	2	7	SPAC664.01c	SPAC664.01c swi6 chromodomain protein Swi6	-0.330138	sensitive genes
193	1	9	SPAC15E1.09	SPAC15E1.09 grx2 glutaredoxin Grx2	-0.32992	sensitive genes
2287	6	16	SPBC13E7.03c	SPBC13E7.03c RNA hairpin binding protein	-0.328881	sensitive genes
260	1	11	SPBC25B2.01	SPBC25B2.01 elongation factor 1 alpha related protein Hbs1 (	-0.32795	sensitive genes
799	3	2	SPAC13A11.01c	SPAC13A11.01c rga8 GTPase activating protein Rga8	-0.327427	sensitive genes
43	1	2	SPBC16C6.02c	SPBC16C6.02c vps1302 chorein homolog	-0.324835	sensitive genes
483	2	5	SPAC17A2.06c	SPAC17A2.06c vps8 WD repeat protein Vps8	-0.324224	sensitive genes
2620	7	14	SPCC285.04	SPCC285.04 transthyretin	-0.322376	sensitive genes
377	1	16	SPBC16A3.08c	SPBC16A3.08c nuclear telomere cap complex subunit	-0.321018	sensitive genes						0.3
2216	6	13	SPBC15C4.01c	SPBC15C4.01c oca3 TPR repeat protein Oca3	-0.320968	sensitive genes
649	2	12	SPBC106.02c	SPBC106.02c srx1 sulphiredoxin	-0.318562	sensitive genes
183	1	8	SPAC8C9.03	SPAC8C9.03 cgs1 cAMP-dependent protein kinase regulatory su	-0.318461	sensitive genes
2186	6	12	SPBC1289.13c	SPBC1289.13c alpha-1,2-galactosyltransferase"	-0.314175	sensitive genes
1106	3	15	SPBC16H5.04	SPBC16H5.04 pho88 family protein	-0.313955	sensitive genes
2956	8	12	SPAC13C5.02	SPAC13C5.02 dre4 DNA replication protein Dre4	-0.31082	sensitive genes
2206	6	12	SPAC3A11.04	SPAC3A11.04 siepin homolog	-0.309279	sensitive genes
555	2	8	SPBC119.12	SPBC119.12 Golgi matrix protein	-0.308367	sensitive genes
158	1	7	SPBC16E9.15	SPBC16E9.15 heat shock factor binding protein	-0.304231	sensitive genes
1521	4	16	SPBC530.05	SPBC530.05 transcription factor	-0.302425	sensitive genes
1846	5	13	SPAC10F6.15	SPAC10F6.15 S. pombe specific UPF0300 family protein 1	-0.302361	sensitive genes
298	1	13	SPCC18B5.06	SPCC18B5.06 pelota ortholog	-0.301837	sensitive genes
1129	3	16	SPAC4H3.07c	SPAC4H3.07c protein phosphatase Fmp31	-0.301152	sensitive genes
1980	6	3	SPAC18G6.04c	SPAC18G6.04c shm2 serine hydroxymethyltransferase Shm2	-0.298524
2666	7	16	SPBC18H10.18c	SPBC18H10.18c sequence orphan	-0.297547
207	1	9	SPAC15E1.06	SPAC15E1.06 vps29 retromer complex subunit Vps29	-0.296613
2906	8	10	SPCC1393.13	SPCC1393.13 DUF89 family protein	-0.296055
608	2	10	SPBC4F6.12	SPBC4F6.12 pxl1 LIM domain	-0.293997
1103	3	14	SPAC17H9.10c	SPAC17H9.10c ddb1 damaged DNA binding protein Ddb1	-0.292981
283	1	12	SPAC167.01	0 SPBC17G9.02c RNA polymerase II accessory factor, Cdc73 fa	-0.292236
1969	6	3	SPAC23H3.08c	SPAC23H3.08c bub3 mitotic spindle checkpoint protein Bub3	-0.291757
2190	6	12	SPBC337.15c	SPBC337.15c coq7 ubiquinone biosynthesis protein Coq7	-0.291695
159	1	7	SPAC1527.02	SPAC1527.02 sft2 Golgi transport protein Sft2	-0.289879
419	2	2	SPBC17A3.10	SPBC17A3.10 pas4 ubiquitin-protein ligase E3	-0.288282
1496	4	15	SPAC19G12.15c	SPAC19G12.15c tpp1 trehalose-6-phosphate phosphatase Tpp1	-0.285272
1956	6	2	SPCC1739.05	SPCC1739.05 set5 histone lysine methyltransferase Set5	-0.285128
1059	3	13	SPCC417.09c	SPCC417.09c transcription factor	-0.284775
2209	6	13	SPAC29E6.09	SPAC29E6.09 sequence orphan	-0.283709
405	2	1	SPAC23G3.08c	SPAC23G3.08c ubp7 ubiquitin C-terminal hydrolase Ubp7	-0.283277
680	2	13	SPAC3G9.04	SPAC3G9.04 ssu72 phosphoric ester hydrolase	-0.283085
809	3	2	SPCC1682.15	SPCC1682.15 mug122 PX/PXA domain protein	-0.281658
145	1	7	SPAC1420.03	SPAC1420.03 rpn501 19S proteasome regulatory subunit Rpn501	-0.281294
2215	6	13	SPBC1703.03c	4 SPBC1703.03c armadillo repeat protein, unknown biological	-0.281129
1577	5	2	SPBC20F10.07	SPBC20F10.07 GRAM domain protein	-0.280844
697	2	14	SPBC106.10	SPBC106.10 pka1 cAMP-dependent protein kinase catalytic sub	-0.277293
2517	7	9	SPAC3H5.11	SPAC3H5.11 NAD/NADH kinase	-0.273156
1797	5	11	SPCC663.08c	SPCC663.08c short chain dehydrogenase	-0.268801
1490	4	15	SPCPJ732.02c	SPCPJ732.02c xylulose kinase	-0.261643
1844	5	13	SPCC576.02	SPCC576.02 hydantoin racemase family	-0.260638
876	3	5	SPAC4F10.20	SPAC4F10.20 grx1 glutaredoxin Grx1	-0.260211
1235	4	4	SPBC56F2.11	SPBC56F2.11 met6 homoserine O-acetyltransferase	-0.259989
2040	6	5	SPBC3H7.11	SPBC3H7.11 actin binding methyltransferase	-0.257705
1981	6	3	SPBC3D6.06c	SPBC3D6.06c ribose-phosphate pyrophosphokinase	-0.25744
215	1	9	SPAC4G9.06c	SPAC4G9.06c sequence orphan	-0.256959
313	1	14	SPBPB8B6.05c	SPBPB8B6.05c L-asparaginase	-0.256784
74	1	4	SPBC543.07	SPBC543.07 pek1 MAP kinase kinase Pek1	-0.256734
2601	7	13	SPCP20C8.02c	SPCP20C8.02c S. pombe specific UPF0321 family protein 1	-0.255973
2617	7	14	SPAC890.06	SPAC890.06 nucleoporin Nup157/170	-0.255753
143	1	6	SPBC32F12.07c	SPBC32F12.07c ubiquitin-protein ligase E3	-0.254815
1951	6	2	SPAC144.11	SPAC144.11 rps1102 40S ribosomal protein S11	-0.254173
1245	4	4	SPCC18B5.03	SPCC18B5.03 wee1 dual specificity protein kinase Wee1	-0.252712
1280	4	6	SPAC4F10.16c	SPAC4F10.16c P-type ATPase	-0.25195
24	1	1	SPBCPT2R1.02	SPBCPT2R1.02 sequence orphan	-0.251478
1088	3	14	SPAC630.13c	SPAC630.13c tsc2 tuberin	-0.251391
1218	4	3	SPAC56F8.02	SPAC56F8.02 AMP binding enzyme	-0.250732
191	1	8	SPBC32H8.03	SPBC32H8.03 bem46 esterase/lipase	-0.24999
795	3	2	SPAC3H5.08c	SPAC3H5.08c WD repeat protein Wdr44 family	-0.248883
2640	7	14	SPCC70.09c	SPCC70.09c mug9 conserved fungal protein	-0.247749
1870	5	14	SPAC1952.12c	SPAC1952.12c csn71 COP9/signalosome complex subunit 7a	-0.247305
1796	5	11	SPCC553.03	SPCC553.03 pex1 AAA family ATPase Pex1	-0.245772
2263	6	15	SPBC1709.11c	SPBC1709.11c png2 ING family homolog Png2	-0.245737
107	1	5	SPBC56F2.14	SPBC56F2.14 mrpl44 mitochondrial ribosomal protein subunit	-0.245419
1898	5	16	SPCC576.13	SPCC576.13 swc5 chromatin remodeling complex subunit Swc5	-0.245121
955	3	8	SPAC1006.09	SPAC1006.09 win1 MAP kinase kinase kinase Win1	-0.244494
67	1	3	SPAC1F8.08	SPAC1F8.08 sequence orphan	-0.243917
2624	7	14	SPAC17A5.16	SPAC17A5.16 human down-regulated in multiple cancers-1 hom	-0.243561
401	2	1	SPAC22F8.04	SPAC22F8.04 triose phosphate transporter	-0.242704
1834	5	13	SPCC74.09	SPCC74.09 mug24 RNA-binding protein	-0.242578
2597	7	13	SPBC2G2.07c	SPBC2G2.07c mug178 mitochondrial ribosomal protein subunit	-0.24239
2725	8	2	SPBC21B10.06c	SPBC21B10.06c sequence orphan	-0.238191
116	1	5	SPBC31F10.05	SPBC31F10.05 mug37 sequence orphan	-0.237919
1613	5	4	SPAC26H5.07c	SPAC26H5.07c seven transmembrane receptor-like protein	-0.236408
2454	7	7	SPAC6G10.11c	SPAC6G10.11c ubi3 ribosomal ubiquitin fusion protein Ubi3	-0.236336
1167	4	1	SPAC17A2.09c	SPAC17A2.09c csx1 RNA-binding protein Csx1	-0.235242
1249	4	5	SPCP31B10.07	SPCP31B10.07 eft202 translation elongation factor 2	-0.234283
418	2	2	SPBC557.04	SPBC557.04 ppk29 Ark1/Prk1 family protein kinase Ppk29	-0.233749
1614	5	4	SPCC757.09c	SPCC757.09c rnc1 RNA-binding protein that suppresses calcin	-0.233523
186	1	8	SPAC11E3.05	SPAC11E3.05 ubiquitin-protein ligase E3	-0.232223
1572	5	2	SPBC2D10.11c	SPBC2D10.11c nucleosome assembly protein Nap2	-0.231879
1190	4	2	SPAC8E11.05c	SPAC8E11.05c conserved fungal protein	-0.231522
1400	4	11	SPAC1805.14	SPAC1805.14 sequence orphan	-0.231522
449	2	3	SPAC22F8.11	SPAC22F8.11 plc1 phosphoinositide phospholipase C Plc1	-0.231107
1223	4	3	SPCC1672.12c	SPCC1672.12c DUF410 family protein	-0.228512
2570	7	12	SPBC18H10.10c	SPBC18H10.10c cwc16 complexed with Cdc5 protein Cwf16	-0.228146
2433	7	6	SPAC922.07c	SPAC922.07c aldehyde dehydrogenase	-0.227575
519	2	6	SPBC20F10.06	SPBC20F10.06 mad2 spindle checkpoint protein Mad2	-0.227395
700	2	14	SPBC354.13	SPBC354.13 rga6 GTPase activating protein Rga6	-0.226794
1847	5	13	SPAC212.04c	SPAC212.04c S. pombe specific DUF999 family protein 1	-0.225799
1772	5	10	SPAC1142.07c	SPAC1142.07c vps32 vacuolar sorting protein Vps32	-0.225649
2022	6	5	SPBC16G5.11c	SPBC16G5.11c bag101 BAG family molecular chaperone regulato	-0.225568
2236	6	14	SPBC20F10.03	SPBC20F10.03 conserved eukaryotic protein	-0.225119
1057	3	13	SPCC1919.11	SPCC1919.11 mug137 BAR adaptor protein	-0.224557
1792	5	11	SPAC4F10.13c	SPAC4F10.13c mpd2 GYF domain	-0.222742
590	2	9	SPAC57A7.12	SPAC57A7.12 heat shock protein Pdr13	-0.221997
2711	8	1	SPAC10F6.17c	SPAC10F6.17c pyruvate dehydrogenase (lipoamide) phosphatas	-0.221954
72	1	3	SPBCPT2R1.03	SPBCPT2R1.03 hypothetical protein	-0.221927
909	3	6	SPAC11D3.14c	SPAC11D3.14c oxoprolinase	-0.219695
3006	8	14	SPBC11C11.10	SPBC11C11.10 tRNA pseudouridine synthase	-0.219405
1729	5	9	SPAC1D4.01	SPAC1D4.01 sequence orphan	-0.215753
2647	7	15	SPCC16A11.15c	SPCC16A11.15c sequence orphan	-0.21541
3061	8	16	SPAC23C4.12	SPAC23C4.12 hhp2 serine/threonine protein kinase Hhp2	-0.214063
2471	7	7	SPAPB21F2.02	SPAPB21F2.02 Dopey family protein	-0.213922
1670	5	6	SPAC1D4.05c	SPAC1D4.05c Erd1 homolog	-0.213342
674	2	13	SPAC2G11.05c	SPAC2G11.05c BRO1 domain protein	-0.21331
1320	4	7	SPBC1683.12	SPBC1683.12 nicotinic acid plasma membrane transporter	-0.212331
1169	4	1	SPAC29B12.14c	SPAC29B12.14c purine transporter	-0.212129
2208	6	12	SPAC6F12.03c	SPAC6F12.03c fsv1 SNARE Fsv1	-0.212026
454	2	3	SPAC8C9.11	SPAC8C9.11 conserved protein (broad species distribution)	-0.210526
1660	5	6	SPCC645.11c	SPCC645.11c mug117 meiotically upregulated gene Mug117	-0.209334
1498	4	15	SPAC20H4.04	SPAC20H4.04 mfh2 ATP-dependent 3' to 5' DNA helicase	-0.208615
2214	6	13	SPBPB10D8.06c	SPBPB10D8.06c membrane transporter	-0.208411
2070	6	7	SPBC428.05c	SPBC428.05c arg12 argininosuccinate synthase	-0.207558
314	1	14	SPBC725.10	SPBC725.10 tspO homolog	-0.206758
1795	5	11	SPCC24B10.20	SPCC24B10.20 short chain dehydrogenase	-0.206735
802	3	2	SPAC688.10	SPAC688.10 rev3 DNA polymerase zeta catalytic subunit Rev3	-0.206592
2602	7	13	SPAC13G7.06	SPAC13G7.06 met16 phosphoadenosine phosphosulfate reductase	-0.206284
1757	5	10	SPAC29B12.05c	SPAC29B12.05c S-adenosylmethionine-dependent methyltransfe	-0.206019
425	2	2	SPBC21B10.03c	SPBC21B10.03c ataxin-2 homolog	-0.205803
810	3	2	SPBC31E1.02c	9 SPBC31E1.02c pmr1 P-type ATPase, calcium transporting Pmr1	-0.205347
1065	3	13	SPBC31F10.14c	SPBC31F10.14c hip3 HIRA interacting protein Hip3	-0.204448
951	3	8	SPBC3D6.13c	SPBC3D6.13c protein disulfide isomerase	-0.203485
1337	4	8	SPCC1450.02	SPCC1450.02 bromodomain protein	-0.203036
253	1	11	SPAC13A11.03	SPAC13A11.03 mcp7 meiosis specific coiled-coil protein Mcp7	-0.202885
1393	4	11	SPAPJ760.02c	SPAPJ760.02c app1 App1 protein	-0.202245
1011	3	11	SPCC417.06c	SPCC417.06c ppk35 serine/threonine protein kinase Ppk35	-0.202203
1966	6	2	SPAC25B8.09	SPAC25B8.09 trans-aconitate 3-methyltransferase	-0.20175
2523	7	10	SPBC2D10.09	SPBC2D10.09 3-hydroxyisobutyryl-CoA hydrolase	-0.201434
1163	4	1	SPAC607.10	SPAC607.10 spo3 sporulation protein Spo3	-0.20102
961	3	9	SPCC1840.12	SPCC1840.12 OPT oligopeptide transporter family	-0.200828
1871	5	14	SPCC285.13c	SPCC285.13c nucleoporin Nup60	-0.199565
2349	7	2	SPAPJ698.02c	SPAPJ698.02c rps002 40S ribosomal protein S0B	-0.19823
504	2	5	SPAC9G1.05	SPAC9G1.05 actin cortical patch component Aip1	-0.197001
1058	3	13	SPAC1B3.04c	SPAC1B3.04c mitochondrial GTPase Guf1	-0.196759
184	1	8	SPAC10F6.06	SPAC10F6.06 vip1 RNA-binding protein Vip1	-0.196704
1233	4	4	SPBC3D6.02	SPBC3D6.02 but2 neddylation pathway protein But2	-0.196647
2343	7	2	SPAP7G5.05	SPAP7G5.05 rpl1002 60S ribosomal protein L10	-0.196325
1726	5	8	SPAC17A5.07c	SPAC17A5.07c ulp2 SUMO deconjugating peptidase Ulp2	-0.196278
1774	5	10	SPAC17A5.10	SPAC17A5.10 conserved fungal protein	-0.196013
1760	5	10	SPAC9E9.15	SPAC9E9.15 CIA30 family protein	-0.195616
2595	7	13	SPBC18A7.01	SPBC18A7.01 X-Pro dipeptidase	-0.193787
812	3	2	SPBC947.10	SPBC947.10 ubiquitin-protein ligase E3	-0.193718
894	3	6	SPAC29A4.11	SPAC29A4.11 rga3 GTPase activating protein Rga3	-0.193685
983	3	9	SPAC1527.01	2 SPAC1527.01 mok11 alpha-1,3-glucan synthase Mok11"	-0.193103
2116	6	9	SPAC1834.09	SPAC1834.09 mug51 conserved fungal protein	-0.19301
1398	4	11	SPAC11H11.03c	SPAC11H11.03c SMR and DUF1771 domain protein	-0.192819
1681	5	7	SPAC1A6.09c	SPAC1A6.09c lag1 sphingosine N-acyltransferase Lag1	-0.192709
481	2	5	SPAC1687.15	SPAC1687.15 gsk3 serine/threonine protein kinase Gsk3	-0.192338
2346	7	2	SPBC29A10.16c	SPBC29A10.16c cytochrome b5	-0.192064
1086	3	14	SPAC32A11.03c	SPAC32A11.03c phx1 homeobox transcription factor Phx1	-0.19194
831	3	3	SPCC962.04	SPCC962.04 rps1201 40S ribosomal protein S12	-0.191897
2623	7	14	SPBP4H10.17c	SPBP4H10.17c carboxyl methyl esterase	-0.191597
1748	5	9	SPCC1494.09c	SPCC1494.09c sequence orphan	-0.19145
2719	8	2	SPAC29B12.08	SPAC29B12.08 sequence orphan	-0.190951
160	1	7	SPBC19F8.01c	SPBC19F8.01c spn7 septin Spn7	-0.190038
218	1	10	SPBC725.05c	SPBC725.05c nucleotide pyrophosphatase	-0.189322
94	1	4	SPAC13G6.07c	SPAC13G6.07c rps601 40S ribosomal protein S6	-0.188966
1534	4	16	SPAC15E1.05c	SPAC15E1.05c ethanolamine-phosphate cytidylyltransferase	-0.187516
109	1	5	SPCP1E11.11	SPCP1E11.11 Puf family RNA-binding protein	-0.187463
551	2	7	SPAC26F1.08c	SPAC26F1.08c conserved protein	-0.186793
2648	7	15	SPAC869.08	SPAC869.08 pcm2 protein-L-isoaspartate O-methyltransferase	-0.18612
2622	7	14	SPAC5H10.07	SPAC5H10.07 sequence orphan	-0.186043
1907	5	16	SPAPJ696.01c	SPAPJ696.01c vps17 retromer complex subunit Vps17	-0.186028
964	3	9	SPBC409.19c	SPBC409.19c metaxin	-0.185714
287	1	12	SPBC3D6.10	SPBC3D6.10 apn2 AP-endonuclease Apn2	-0.185531
525	2	6	SPBC29A3.05	SPBC29A3.05 chromatin remodeling complex subunit	-0.185383
520	2	6	SPBC9B6.07	SPBC9B6.07 nucleolar protein Nop52 family	-0.185223
403	2	1	SPAC23A1.07	SPAC23A1.07 ubiquitin-protein ligase E3	-0.184277
2130	6	9	SPAPB1E7.02c	SPAPB1E7.02c mcl1 DNA polymerase alpha accessory factor Mcl	-0.184018
308	1	13	SPBC337.16	SPBC337.16 cho1 phosphatidyl-N-methylethanolamine N-methylt	-0.183299
266	1	12	SPBC725.06c	SPBC725.06c ppk31 serine/threonine protein kinase Ppk31	-0.183123
1012	3	11	SPBC713.03	SPBC713.03 D-lactate dehydrogenase (cytochrome)	-0.18285
1728	5	8	SPAC22A12.11	SPAC22A12.11 dak1 dihydroxyacetone kinase Dak1	-0.182384
2324	7	1	SPAC3F10.04	SPAC3F10.04 gsa1 glutathione synthetase large subunit Gsa1	-0.182108
858	3	4	SPBC354.10	SPBC354.10 RNAPII degradation factor	-0.18209
1934	6	1	SPAC22G7.07c	SPAC22G7.07c mRNA (N6-adenosine)-methyltransferase	-0.181067
1699	5	7	SPCC18B5.05c	SPCC18B5.05c phosphomethylpyrimidine kinase	-0.181006
881	3	5	SPBC1271.15c	SPBC1271.15c translation initiation factor IF-2Mt	-0.180642
855	3	4	SPBC29A3.14c	SPBC29A3.14c trt1 telomerase reverse transcriptase 1 protei	-0.179895
2352	7	2	SPBC354.04	SPBC354.04 sequence orphan	-0.179563
3062	8	16	SPCC1906.04	SPCC1906.04 wtf20 wtf element Wtf20	-0.178886
166	1	7	SPBC83.04	SPBC83.04 apc15 anaphase-promoting complex subunit Apc15	-0.178885
1942	6	1	SPBC29A10.01	SPBC29A10.01 ccr1 NADPH-cytochrome p450 reductase	-0.178637
1608	5	3	SPAC14C4.12c	SPAC14C4.12c SWIRM domain protein	-0.178295
2954	8	12	SPAC12B10.04	SPAC12B10.04 tubulin-tyrosine ligase	-0.177909
681	2	13	SPAC19B12.04	SPAC19B12.04 rps3001 40S ribosomal protein S30	-0.177773
2571	7	12	SPBC2F12.05c	SPBC2F12.05c sterol binding ankyrin repeat protein	-0.177443
2233	6	14	SPCC1281.07c	SPCC1281.07c glutathione S-transferase Gst3	-0.176947
2288	6	16	SPBP4H10.19c	SPBP4H10.19c calreticulin/calnexin homolog	-0.176809
2882	8	9	SPCC895.06	SPCC895.06 RNA polymerase II elongator complex subunit Elp	-0.176523
301	1	13	SPAC13G7.03	SPAC13G7.03 up-frameshift suppressor3 family	-0.17616
2625	7	14	SPAC12G12.15	SPAC12G12.15 sif3 Sad1 interacting factor 3	-0.176151
2649	7	15	SPCPB1C11.01	SPCPB1C11.01 amt1 ammonium transporter Amt1	-0.175991
1282	4	6	SPAC1556.02c	SPAC1556.02c sdh1 succinate dehydrogenase Sdh1	-0.175703
2642	7	15	SPCC191.05c	SPCC191.05c nucleoside 2-deoxyribosyltransferase	-0.175229
650	2	12	SPBC32H8.08c	SPBC32H8.08c mannosyltransferase complex subunit	-0.175017
622	2	10	SPCC1223.06	SPCC1223.06 tea1 cell end marker Tea1	-0.174848
804	3	2	SPAPB1E7.05	SPAPB1E7.05 gde1 glycerophosphoryl diester phosphodiesteras	-0.174011
1824	5	12	SPAC22F8.05	2 SPAC22F8.05 alpha,alpha-trehalose-phosphate synthase"	-0.173166
1105	3	15	SPCC24B10.03	SPCC24B10.03 sequence orphan	-0.173015
1915	5	16	SPBC660.06	SPBC660.06 conserved fungal protein	-0.172532
1918	5	16	SPAC19D5.02c	SPAC19D5.02c peroxisomal membrane protein Pex22	-0.172532
675	2	13	SPAC17D4.03c	SPAC17D4.03c cis4 membrane transporter	-0.171812
2351	7	2	SPAC23A1.16c	SPAC23A1.16c DUF408 family protein	-0.171549
3049	8	16	SPAC30C2.08	SPAC30C2.08 conserved fungal protein	-0.171374
398	2	1	SPAC56F8.06c	SPAC56F8.06c alg10 dolichyl-phosphate-glucose-glycolipid al	-0.171169
1990	6	3	SPBC29A10.05	SPBC29A10.05 exo1 exonuclease I Exo1	-0.171056
1837	5	13	SPBC32F12.05c	SPBC32F12.05c cwf12 complexed with Cdc5 protein Cwf12	-0.170881
1917	5	16	SPBP35G2.13c	SPBP35G2.13c swc2 chromatin remodeling complex subunit Swc2	-0.17026
1822	5	12	SPAC17H9.09c	SPAC17H9.09c ras1 GTPase Ras1	-0.169341
986	3	10	SPAC1A6.01c	SPAC1A6.01c human thyroid receptor interacting protein hom	-0.169064
1790	5	11	SPAC30C2.02	SPAC30C2.02 mmd1 deoxyhypusine hydroxylase	-0.16902
2398	7	4	SPAC31A2.14	1 SPAC31A2.14 WD repeat protein, human WRDR48 family"	-0.168405
1552	5	1	SPAC227.01c	SPAC227.01c Erd1 homolog	-0.168267
2973	8	12	SPBC1778.02	SPBC1778.02 rap1 telomere binding protein Rap1	-0.168131
2356	7	3	SPCC663.11	SPCC663.11 ww domain binding protein 11 (wbp11) ortholog	-0.167862
161	1	7	SPAC1851.02	SPAC1851.02 1-acylglycerol-3-phosphate O-acyltransferase	-0.167431
815	3	2	SPAC16.01	SPAC16.01 rho2 Rho family GTPase Rho2	-0.167355
976	3	9	SPAC7D4.12c	SPAC7D4.12c DUF1212 family protein	-0.167284
87	1	4	SPAC6G9.08	SPAC6G9.08 ubp6 ubiquitin C-terminal hydrolase Ubp6	-0.167244
429	2	2	SPBC29A10.09c	SPBC29A10.09c CAF1 family ribonuclease	-0.1671
959	3	8	SPAC1783.05	SPAC1783.05 hrp1 ATP-dependent DNA helicase Hrp1	-0.166539
1715	5	8	SPAC9G1.08c	SPAC9G1.08c phospholipase	-0.16646
231	1	10	SPAC9E9.08	SPAC9E9.08 rad26 ATRIP	-0.166309
1684	5	7	SPAC227.18	SPAC227.18 lys3 saccharopine dehydrogenase [NAD+, L-lysine	-0.165649
1550	5	1	SPBC4F6.16c	SPBC4F6.16c ero11 ER oxidoreductin Ero1a	-0.164843
467	2	4	SPBC17D1.06	SPBC17D1.06 dbp3 ATP-dependent RNA helicase Dbp3	-0.164563
389	2	1	SPAC17G6.02c	SPAC17G6.02c tco1 RTA1-like protein	-0.164551
2438	7	6	SPAC1952.17c	SPAC1952.17c GTPase activating protein	-0.164326
133	1	6	SPAC2E1P3.04	SPAC2E1P3.04 copper amine oxidase	-0.163721
2661	7	15	SPAC9.08c	SPAC9.08c steroid reductase	-0.163258
511	2	6	SPBC15D4.15	SPBC15D4.15 pho2 4-nitrophenylphosphatase	-0.162955
426	2	2	SPBP22H7.05c	SPBP22H7.05c ATPase with bromodomain protein	-0.162768
106	1	5	SPAPB8E5.02c	SPAPB8E5.02c rpn502 19S proteasome regulatory subunit Rpn50	-0.162172
182	1	8	SPAC1093.06c	SPAC1093.06c dhc1 dynein heavy chain	-0.162016
1705	5	8	SPAC19G12.03	SPAC19G12.03 cda1 chitin deacetylase Cda1	-0.161823
1967	6	2	SPAC5H10.12c	SPAC5H10.12c acetylglucosaminyltransferase	-0.161682
1939	6	1	SPCC1840.09	SPCC1840.09 NAD dependent epimerase/dehydratase family pro	-0.160384
898	3	6	SPAC6G9.10c	SPAC6G9.10c sen1 splicing endonuclease Sen1	-0.16007
136	1	6	SPAC10F6.04	SPAC10F6.04 RCC domain protein Ats1	-0.15981
190	1	8	SPAC144.02	SPAC144.02 transcription factor	-0.159716
1136	3	16	SPAC637.11	SPAC637.11 suv3 ATP-dependent RNA helicase Suv3	-0.159713
800	3	2	SPAC3A11.06	SPAC3A11.06 mvp1 sorting nexin Mvp1	-0.159613
1469	4	14	SPBC2G2.01c	SPBC2G2.01c liz1 pantothenate transporter	-0.159561
803	3	2	SPAC14C4.07	SPAC14C4.07 membrane transporter	-0.159451
2179	6	11	SPCC338.08	SPCC338.08 ctp1 sequence orphan	-0.159393
2334	7	2	SPCC306.02c	SPCC306.02c Rab GTPase binding	-0.159266
2064	6	6	SPAC5H10.02c	SPAC5H10.02c ThiJ domain protein	-0.159188
1546	5	1	SPCC1393.09c	SPCC1393.09c RWD domain	-0.159091
502	2	5	SPAC8C9.12c	SPAC8C9.12c iron ion transporter	-0.157895
45	1	2	SPBC26H8.05c	SPBC26H8.05c serine/threonine protein phosphatase	-0.157714
2982	8	13	SPAC1A6.06c	SPAC1A6.06c meu31 sequence orphan	-0.157507
113	1	5	SPAC17G8.05	SPAC17G8.05 med20 TATA-box related factor (TRF)	-0.157332
1566	5	2	SPCC736.13	SPCC736.13 short chain dehydrogenase	-0.157143
1872	5	14	SPAC23D3.04c	SPAC23D3.04c gpd2 glycerol-3-phosphate dehydrogenase Gpd2	-0.156977
472	2	4	SPBC9B6.03	SPBC9B6.03 zinc finger protein	-0.156585
2655	7	15	SPCC16C4.17	SPCC16C4.17 mug123 meiotically upregulated gene Mug123	-0.156577
1216	4	3	SPAC3C7.01c	SPAC3C7.01c inositol polyphosphate phosphatase	-0.156555
2268	6	15	SPAC22F3.13	SPAC22F3.13 tsc1 hamartin	-0.156162
576	2	8	SPCC132.04c	SPCC132.04c NAD-dependent glutamate dehydrogenase	-0.156027
70	1	3	SPBC4B4.06	SPBC4B4.06 vps25 ESCRT II complex subunit Vps25	-0.155955
1171	4	1	SPAC57A10.12c	SPAC57A10.12c ura3 dihydroorotate dehydrogenase Ura3	-0.155931
1506	4	15	SPAC7D4.03c	SPAC7D4.03c conserved fungal family	-0.155751
362	1	16	SPBC800.08	SPBC800.08 gcd10 translation initiation factor eIF-3 gamma	-0.155713
1185	4	2	SPBC365.07c	SPBC365.07c TATA element modulatory factor homolog	-0.155686
1606	5	3	SPCC162.11c	SPCC162.11c uridine kinase	-0.155592
1423	4	12	SPBC337.11	SPBC337.11 mitochondrial peptidase	-0.155274
1526	4	16	SPBC3B8.02	SPBC3B8.02 php5 CCAAT-binding factor complex subunit Php5	-0.155234
2138	6	10	SPBC119.03	SPBC119.03 S-adenosylmethionine-dependent methyltransferas	-0.15477
228	1	10	SPAC24B11.10c	SPAC24B11.10c chr3 chitin synthase regulatory factor Chr3	-0.153938
1060	3	13	SPBP35G2.11c	SPBP35G2.11c transcription related zf-ZZ type zinc finger	-0.153741
479	2	4	SPBC2F12.12c	SPBC2F12.12c conserved eukaryotic protein	-0.153671
1908	5	16	SPBC776.16	SPBC776.16 sequence orphan	-0.153442
1239	4	4	SPCC11E10.05c	SPCC11E10.05c ynd1 nucleoside diphosphatase	-0.152996
1752	5	9	SPAC167.04	SPAC167.04 pam17 presequence translocase-associated motor s	-0.152922
2448	7	6	SPBC3B8.04c	SPBC3B8.04c membrane transporter	-0.152883
604	2	10	SPBC342.05	2 SPBC342.05 crb2 DNA repair protein RAD9 homolog, Rhp9"	-0.152834
357	1	15	SPAC2C4.09	SPAC2C4.09 DUF1640 family protein	-0.152731
729	2	15	SPAC19B12.07c	SPAC19B12.07c human ZNF277P homolog	-0.152094
1848	5	13	SPAC186.05c	SPAC186.05c human TMEM165 homolog	-0.151817
2011	6	4	SPAC1A6.08c	SPAC1A6.08c mug125 sequence orphan	-0.151722
1149	3	16	SPAC1420.01c	SPAC1420.01c DUF1752 family protein	-0.151693
482	2	5	SPAC29A4.02c	SPAC29A4.02c translation elongation factor EF-1 gamma subu	-0.151353
693	2	13	SPAC25G10.03	SPAC25G10.03 zip1 transcription factor Zip1	-0.15134
707	2	14	SPBC1861.03	SPBC1861.03 mak10 NatC N-acetyltransferase complex subunit	-0.151296
2633	7	14	SPCC965.09	SPCC965.09 nitrilase	-0.151028
2375	7	3	SPACUNK4.15	2 SPACUNK4.15 2',3'-cyclic-nucleotide 3'-phosphodiesterase"	-0.150944
2610	7	13	SPAC3H1.04c	SPAC3H1.04c mdm31 mitochondrial inner membrane protein Mdm3	-0.150927
1422	4	12	SPBC646.08c	SPBC646.08c oxysterol binding protein	-0.150022
2639	7	14	SPAC57A7.09	SPAC57A7.09 human RNF family homolog	-0.149955
1551	5	1	SPBC36B7.02	SPBC36B7.02 Svf1 family protein Svf2	-0.149915
2376	7	3	SPAC1783.08c	SPAC1783.08c rpl1502 60S ribosomal protein L15b	-0.149476
731	2	15	SPAC1F3.06c	SPAC1F3.06c spo15 sporulation protein Spo15	-0.149412
1628	5	4	SPAC1002.07c	SPAC1002.07c ats1 N-acetyltransferase Ats1	-0.148633
887	3	5	SPAC6G9.15c	SPAC6G9.15c sequence orphan	-0.148416
2018	6	5	SPCC550.10	SPCC550.10 meu8 betaine aldehyde dehydrogenase	-0.148394
1644	5	5	SPAC3C7.05c	SPAC3C7.05c mug191 alpha-1,6-mannanase"	-0.147186
192	1	8	SPAC1610.03c	SPAC1610.03c crp79 poly(A) binding protein Crp79	-0.14686
1720	5	8	SPAC513.07	SPAC513.07 flavonol reductase/cinnamoyl-CoA reductase fami	-0.146783
1823	5	12	SPCC24B10.11c	SPCC24B10.11c THO complex subunit 7	-0.146657
2596	7	13	SPCC965.07c	SPCC965.07c gst2 glutathione S-transferase Gst2	-0.146597
1276	4	6	SPAC25G10.04c	SPAC25G10.04c rec10 meiotic recombination protein Rec10	-0.1458
1010	3	11	SPAC6F6.03c	SPAC6F6.03c ribosome export GTPase	-0.145781
1866	5	14	SPCPB16A4.02c	SPCPB16A4.02c conserved fungal protein	-0.145367
798	3	2	SPAC26F1.01	SPAC26F1.01 sec74 guanyl-nucleotide exchange factor Sec74	-0.145211
801	3	2	SPAC959.06c	SPAC959.06c sequence orphan	-0.144307
2758	8	3	SPBC31F10.02	SPBC31F10.02 thioesterase superfamily protein	-0.144137
2918	8	10	SPAPB1A11.02	SPAPB1A11.02 esterase/lipase	-0.1435
1397	4	11	SPAC26F1.09	SPAC26F1.09 gyp51 GTPase activating protein Gyp51	-0.143191
477	2	4	SPBC29A10.14	SPBC29A10.14 rec8 meiotic cohesin complex subunit Rec8	-0.142825
1891	5	15	SPCC306.11	SPCC306.11 sequence orphan	-0.142786
1247	4	4	SPCC737.04	SPCC737.04 S. pombe specific UPF0300 family protein 6	-0.14246
2742	8	3	SPAC15A10.15	SPAC15A10.15 sgo2 shugoshin Sgo2	-0.142185
2683	7	16	SPAC9.13c	SPAC9.13c cwf16 splicing factor	-0.14209
356	1	15	SPBC3B9.05	SPBC3B9.05 helper of TIM (Predicted)	-0.141851
95	1	4	SPBC32F12.06	SPBC32F12.06 pch1 cyclin Pch1	-0.141633
3017	8	14	SPAC6F12.04	SPAC6F12.04 COPI-coated vesicle associated protein	-0.141255
2192	6	12	SPBC83.18c	SPBC83.18c C2 domain protein	-0.140477
698	2	14	SPBC32H8.11	SPBC32H8.11 mei4 meiotic forkhead transcription factor Mei4	-0.140063
167	1	7	SPAC4D7.11	SPAC4D7.11 conserved fungal protein	-0.14003
1421	4	12	SPBC2F12.03c	SPBC2F12.03c EST1 family protein	-0.139673
1240	4	4	SPBC4.06	SPBC4.06 acid phosphatase	-0.139606
2621	7	14	SPCC613.11c	SPCC613.11c meu23 DUF1773 family protein 2	-0.1395
654	2	12	SPBC3E7.05c	SPBC3E7.05c conserved eukaryotic protein	-0.139278
1935	6	1	SPBC947.15c	SPBC947.15c NADH dehydrogenase	-0.139224
2572	7	12	SPCC18.09c	SPCC18.09c conserved eukaryotic protein	-0.138791
1199	4	2	SPCC584.13	2 SPCC584.13 amino acid permease, unknown 14"	-0.138737
1994	6	4	SPAPB8E5.06c	SPAPB8E5.06c rpl302 60S ribosomal protein L3	-0.13852
211	1	9	SPAC22H10.02	SPAC22H10.02 conserved fungal protein	-0.137912
882	3	5	SPCC24B10.22	SPCC24B10.22 mitochondrial DNA polymerase gamma catalytic	-0.137769
2519	7	9	SPBC11B10.10c	SPBC11B10.10c pht1 histone H2A variant	-0.137673
2953	8	12	SPAC2F3.08	SPAC2F3.08 sut1 alpha-glucoside transporter	-0.137245
2460	7	7	SPAC17C9.14	SPAC17C9.14 Pex19 protein family	-0.136983
1562	5	2	SPCC306.05c	SPCC306.05c ins1 INSIG domain protein	-0.136642
536	2	7	SPAC3F10.11c	SPAC3F10.11c abc2 glutathione S-conjugate-exporting ATPase	-0.13664
1417	4	12	SPBC18A7.02c	SPBC18A7.02c seven transmembrane receptor-like protein	-0.136382
41	1	2	SPAPB2B4.04c	9 SPAPB2B4.04c P-type ATPase, calcium transporting Pmc1"	-0.136299
1174	4	1	SPBC106.11c	SPBC106.11c plg7 phospholipase A2	-0.135472
2713	8	2	SPAC2E1P3.01	SPAC2E1P3.01 zinc binding dehydrogenase	-0.135002
1914	5	16	SPAC23C11.06c	SPAC23C11.06c hydrolase	-0.134188
261	1	11	SPAC2C4.05	SPAC2C4.05 cornichon family protein	-0.134006
1768	5	10	SPAC5H10.04	SPAC5H10.04 NADPH dehydrogenase	-0.133947
1576	5	2	SPAC27D7.03c	SPAC27D7.03c mei2 RNA-binding protein involved in meiosis M	-0.133419
1165	4	1	SPAC12B10.12c	SPAC12B10.12c rhp41 DNA repair protein Rhp41	-0.133141
2902	8	9	SPBC1734.15	SPBC1734.15 rsc4 RSC complex subunit Rsc4	-0.132974
1322	4	8	SPAC1952.15c	SPAC1952.15c rec24 meiotic recombination protein Rec24	-0.13287
1158	4	1	SPAC1093.03	SPAC1093.03 polyphosphoinositide phosphatase	-0.132827
824	3	3	SPBC21D10.09c	SPBC21D10.09c ubiquitin-protein ligase E3	-0.132207
3033	8	15	SPBC1778.05c	SPBC1778.05c sequence orphan	-0.131624
903	3	6	SPBC359.03c	8 SPBC359.03c amino acid permease, unknown 8"	-0.131231
2949	8	11	SPCC1753.05	SPCC1753.05 rsm1 RNA export factor Rsm1	-0.131044
516	2	6	SPBC685.06	SPBC685.06 rps001 40S ribosomal protein S0A (p40)	-0.130828
1267	4	5	SPAC664.14	SPAC664.14 amt2 ammonium transporter Amt2	-0.130697
114	1	5	SPBC24C6.05	SPBC24C6.05 sec28 coatomer epsilon subunit	-0.130697
862	3	4	SPCC18B5.07c	SPCC18B5.07c nup61 nucleoporin Nup61	-0.129409
928	3	7	SPAC31A2.16	SPAC31A2.16 gef2 RhoGEF Gef2	-0.128556
1957	6	2	SPAC1B3.01c	SPAC1B3.01c uracil phosphoribosyltransferase	-0.128256
279	1	12	SPACUNK4.16c	8 SPACUNK4.16c alpha,alpha-trehalose-phosphate synthase"	-0.128064
1301	4	7	SPCC1919.12c	SPCC1919.12c aminopeptidase	-0.127981
2569	7	12	SPAC6C3.02c	SPAC6C3.02c CHCH domain protein	-0.127299
2326	7	1	SPAC1782.02c	SPAC1782.02c conserved fungal protein	-0.127085
2546	7	11	SPBC83.16c	SPBC83.16c conserved fungal protein	-0.12679
2684	7	16	SPAC20H4.08	SPAC20H4.08 phosphatase activator	-0.126512
1977	6	3	SPBC1861.02	SPBC1861.02 abp2 ARS binding protein Abp2	-0.126025
933	3	7	SPCC569.05c	SPCC569.05c spermidine family transporter	-0.125969
2157	6	10	SPAC4F8.03	SPAC4F8.03 SBDS family protein	-0.125899
2289	6	16	SPAC4C5.02c	SPAC4C5.02c ryh1 GTPase Ryh1	-0.125844
2413	7	5	SPAC30D11.14c	SPAC30D11.14c RNA-binding protein	-0.125514
2691	8	1	SPBC4C3.09	SPBC4C3.09 acetylglucosaminyltransferase	-0.125482
2977	8	13	SPBC106.04	SPBC106.04 ada1 adenosine deaminase Ada1	-0.125247
452	2	3	SPAC823.03	SPAC823.03 ppk15 serine/threonine protein kinase Ppk15	-0.125114
1084	3	14	SPAC24H6.03	SPAC24H6.03 cul3 cullin 3	-0.125053
2681	7	16	SPCC965.14c	SPCC965.14c cytosine deaminase	-0.12495
2210	6	13	SPBC16G5.03	SPBC16G5.03 ubiquitin-protein ligase E3	-0.124577
1500	4	15	SPAC23E2.03c	SPAC23E2.03c ste7 meiotic suppressor protein Ste7	-0.124523
1197	4	2	SPCC18B5.01c	SPCC18B5.01c bfr1 brefeldin A efflux transporter Bfr1	-0.124396
1944	6	1	SPBC359.04c	SPBC359.04c DIPSY family	-0.123339
790	3	1	SPAC3H8.07c	SPAC3H8.07c prefoldin subunit 3	-0.123295
807	3	2	SPBC29A10.07	SPBC29A10.07 nucleoporin Pom152	-0.122871
3026	8	15	SPAC13G6.13	SPAC13G6.13 sequence orphan	-0.122749
1863	5	14	SPBC19C7.08c	SPBC19C7.08c leucine carboxyl methyltransferase	-0.12257
1865	5	14	SPBC2G2.09c	SPBC2G2.09c crs1 meiosis specific cyclin Crs1	-0.12257
230	1	10	SPAC1006.01	SPAC1006.01 psp3 serine protease Psp3	-0.122554
601	2	10	SPAPYUK71.03c	SPAPYUK71.03c C2 domain protein	-0.122035
1958	6	2	SPCC794.10	SPCC794.10 UTP-glucose-1-phosphate uridylyltransferase	-0.121925
1312	4	7	SPAC3G9.05	SPAC3G9.05 GTPase activating protein	-0.121788
2140	6	10	SPBC1709.16c	SPBC1709.16c conserved protein (fungal bacterial plant)	-0.121659
3005	8	14	SPAC23C11.01	3 SPAC23C11.01 ER membrane protein, ICE2 family"	-0.121469
2258	6	15	SPAC57A10.10c	SPAC57A10.10c sla1 La protein homolog	-0.121057
333	1	14	SPBC29A3.07c	SPBC29A3.07c U2 snRNP-associated protein Sf3b14 homolog	-0.121035
407	2	1	SPAC26A3.10	SPAC26A3.10 Arf GAP protein	-0.121027
1079	3	13	SPBC32H8.13c	2 SPBC32H8.13c mok12 alpha-1,3-glucan synthase Mok12"	-0.120773
789	3	1	SPAC25G10.01	SPAC25G10.01 RNA-binding protein	-0.120141
1347	4	9	SPAC18G6.05c	SPAC18G6.05c translation elongation regulator Gcn1	-0.119926
1370	4	10	SPBC16A3.10	1 SPBC16A3.10 membrane bound O-acyltransferase, MBOAT"	-0.119722
44	1	2	SPAC12B10.07	SPAC12B10.07 acp1 F-actin capping protein alpha subunit	-0.119335
69	1	3	SPAC25B8.10	SPAC25B8.10 trans-aconitate 3-methyltransferase	-0.118997
626	2	11	SPAC2F7.10	SPAC2F7.10 palmitoyltransferase	-0.11852
2092	6	8	SPBC16D10.11c	SPBC16D10.11c rps1801 40S ribosomal protein S18	-0.118377
706	2	14	SPBC646.13	SPBC646.13 sds23 inducer of sexual development Sds23/Moc1	-0.118345
2706	8	1	SPAC31G5.17c	SPAC31G5.17c rps1001 40S ribosomal protein S10	-0.118328
1265	4	5	SPAC343.12	SPAC343.12 rds1 conserved fungal protein	-0.118202
2345	7	2	SPBC651.04	SPBC651.04 sequence orphan	-0.1182
355	1	15	SPAC23C4.16c	SPAC23C4.16c atg15 triacylglycerol lipase Atg15	-0.118129
3058	8	16	SPBPJ4664.01	SPBPJ4664.01 dps1 decaprenyl diphosphate synthase subunit D	-0.117887
962	3	9	SPAC4D7.03	SPAC4D7.03 pop2 F-box/WD repeat protein Pop2	-0.117319
1539	5	1	SPAC23C11.04c	SPAC23C11.04c pnk1 DNA kinase/phosphatase Pnk1	-0.116952
1364	4	9	SPAP8A3.13c	SPAP8A3.13c conserved protein family	-0.116758
814	3	2	SPCC188.08c	SPCC188.08c ubp22 ubiquitin C-terminal hydrolase Ubp22	-0.116333
1183	4	2	SPBC2G2.02	SPBC2G2.02 syj1 inositol polyphosphate phosphatase	-0.116237
1224	4	3	SPBC1604.02c	SPBC1604.02c PPR repeat protein	-0.115535
727	2	15	SPAC18G6.15	SPAC18G6.15 mal3 EB1 family Mal3	-0.115357
478	2	4	SPCC11E10.07c	SPCC11E10.07c translation initiation factor eIF2B alpha su	-0.115047
2033	6	5	SPCC1442.11c	SPCC1442.11c sequence orphan	-0.1148
2058	6	6	SPBC21B10.12	SPBC21B10.12 rec6 meiotic recombination protein Rec6	-0.1148
1454	4	13	SPAC30D11.10	SPAC30D11.10 rad22 DNA repair protein Rad22	-0.114444
1327	4	8	SPBC30B4.04c	SPBC30B4.04c sol1 SWI/SNF complex subunit Sol1	-0.11394
2059	6	6	SPAC20H4.11c	SPAC20H4.11c rho5 Rho family GTPase Rho5	-0.113928
461	2	4	SPBC12D12.06	SPBC12D12.06 srb11 cyclin Srb11	-0.112955
1284	4	6	SPAC1639.02c	SPAC1639.02c trk2 potassium ion transporter Trk2	-0.112581
1653	5	5	SPCC4G3.15c	SPCC4G3.15c CCR4-Not complex subunit Not2	-0.112554
2211	6	13	SPAC5H10.05c	SPAC5H10.05c NADHdh_2 domain protein	-0.112074
447	2	3	SPAC227.05	SPAC227.05 prefoldin subunit 4	-0.112011
653	2	12	SPBC13E7.11	SPBC13E7.11 mitochondrial rhomboid protease	-0.111735
2910	8	10	SPBC30D10.03c	SPBC30D10.03c IMP 5'-nucleotidase	-0.111478
1162	4	1	SPAC1B3.17	SPAC1B3.17 clr2 chromatin silencing protein Clr2	-0.111333
1798	5	11	SPAC10F6.05c	SPAC10F6.05c ubc6 ubiquitin conjugating enzyme Ubc6	-0.111182
270	1	12	SPCC188.02	SPCC188.02 par1 protein phosphatase regulatory subunit Par1	-0.111097
3032	8	15	SPCC777.02	SPCC777.02 transcription factor	-0.110928
361	1	16	SPBPJ4664.02	SPBPJ4664.02 glycoprotein	-0.110686
2755	8	3	SPAC23H3.06	SPAC23H3.06 apl6 AP-3 adaptor complex subunit Apl6	-0.109805
2039	6	5	SPAC22E12.06c	SPAC22E12.06c gmh3 alpha-1,2-galactosyltransferase Gmh3"	-0.109729
2612	7	13	SPAC1039.08	SPAC1039.08 serine acetyltransferase	-0.109687
2314	7	1	SPBC13A2.04c	SPBC13A2.04c PTR family peptide transporter	-0.109668
1029	3	11	SPBC1105.08	SPBC1105.08 EMP70 family	-0.109589
1377	4	10	SPBC3E7.16c	SPBC3E7.16c leu3 2-isopropylmalate synthase	-0.109442
2390	7	4	SPCC191.10	SPCC191.10 sequence orphan	-0.109369
1194	4	2	SPCC364.07	SPCC364.07 D-3 phosphoglycerate dehydrogenase	-0.108902
31	1	2	SPAC1002.14	SPAC1002.14 itt1 ubiquitin-protein ligase E3	-0.108888
3031	8	15	SPAC144.06	SPAC144.06 apl5 AP-3 adaptor complex subunit Apl5	-0.108763
2855	8	7	SPAC31G5.18c	2 SPAC31G5.18c ubiquitin family, human C1ORF55 related"	-0.108531
1438	4	12	SPAC14C4.15c	SPAC14C4.15c dipeptidyl aminopeptidase	-0.108115
730	2	15	SPAC4A8.05c	SPAC4A8.05c myp2 myosin II heavy chain	-0.108044
1299	4	7	SPBC4F6.09	SPBC4F6.09 str1 siderophore-iron transporter Str1	-0.107554
1803	5	12	SPAC227.06	SPAC227.06 Rab GTPase binding	-0.107525
791	3	1	SPBC36B7.08c	SPBC36B7.08c nucleosome assembly protein	-0.107424
602	2	10	SPBC32H8.06	1 SPBC32H8.06 mug93 TPR repeat protein, meiotically spliced"	-0.107344
436	2	3	SPAC31G5.19	SPAC31G5.19 ATPase with bromodomain protein	-0.10695
1144	3	16	SPBC31E1.01c	SPBC31E1.01c atg2 autophagy associated protein Mug36	-0.106897
453	2	3	SPAC23H3.03c	SPAC23H3.03c nitrogen permease regulator family	-0.106886
2369	7	3	SPCC338.04	SPCC338.04 cid2 caffeine induced death protein Cid2	-0.106731
2770	8	4	SPAC9G1.04	SPAC9G1.04 oxa101 mitochondrial inner membrane translocase	-0.106684
2875	8	8	SPAC664.03	SPAC664.03 RNA polymerase II associated Paf1 complex	-0.106684
2899	8	9	SPAC3A12.10	SPAC3A12.10 rpl2001 60S ribosomal protein L20a	-0.106684
2807	8	5	SPAC29E6.05c	SPAC29E6.05c peptide methionine sulfoxide reductase	-0.106535
138	1	6	SPAC11E3.01c	SPAC11E3.01c swr1 SNF2 family helicase Swr1	-0.106208
861	3	4	SPAC10F6.11c	SPAC10F6.11c kinase activator	-0.106026
2724	8	2	SPCC13B11.02c	SPCC13B11.02c sequence orphan	-0.105975
1502	4	15	SPAC30D11.11	SPAC30D11.11 Haemolysin-III family protein	-0.105942
766	2	16	SPCC1259.03	SPCC1259.03 rpa12 DNA-directed RNA polymerase complex I sub	-0.105773
2589	7	12	SPAC17A2.07c	SPAC17A2.07c sequence orphan	-0.105202
1836	5	13	SPCC622.12c	SPCC622.12c NADP-specific glutamate dehydrogenase	-0.104934
2685	7	16	SPAC22F3.02	SPAC22F3.02 atf31 transcription factor Atf31	-0.104539
1906	5	16	SPCC1020.08	SPCC1020.08 wybutosine biosynthesis protein Tyw1	-0.104513
2302	6	16	SPAC56F8.14c	SPAC56F8.14c mug115 sequence orphan	-0.10427
574	2	8	SPCC1223.05c	SPCC1223.05c rpl3702 60S ribosomal protein L37	-0.104251
2008	6	4	SPAC10F6.12c	SPAC10F6.12c mam4 protein-S isoprenylcysteine O-methyltrans	-0.104155
784	3	1	SPAC3A11.10c	SPAC3A11.10c dipeptidyl aminopeptidase	-0.103933
3020	8	14	SPCC4G3.04c	SPCC4G3.04c coq5 C-methytransferase	-0.103893
239	1	10	SPBC354.03	SPBC354.03 swd3 WD repeat protein Swd3	-0.103711
2702	8	1	SPCC550.01c	SPCC550.01c CHCH domain protein	-0.103173
2662	7	15	SPCP20C8.01c	SPCP20C8.01c B13958 domain	-0.102964
857	3	4	SPCC16A11.08	SPCC16A11.08 atg20 sorting nexin Atg20	-0.102883
523	2	6	SPBC25H2.05	SPBC25H2.05 egd2 nascent polypeptide-associated complex alp	-0.102675
717	2	14	SPBC2A9.04c	SPBC2A9.04c Sir Antagonist ortholog	-0.102654
811	3	2	SPCC584.11c	SPCC584.11c Svf1 family protein Svf1	-0.102509
42	1	2	SPAC11D3.17	SPAC11D3.17 zinc finger protein	-0.102377
238	1	10	SPAC144.05	SPAC144.05 ATP-dependent DNA helicase	-0.102204
55	1	3	SPAC513.06c	SPAC513.06c dihydrodiol dehydrogenase	-0.101957
1960	6	2	SPCC4B3.06c	SPCC4B3.06c NADPH-dependent FMN reductase	-0.101695
1746	5	9	SPBC2G2.13c	SPBC2G2.13c deoxycytidylate deaminase	-0.101551
1567	5	2	SPAC3C7.09	SPAC3C7.09 set8 lysine methyltransferase Set8	-0.101542
1964	6	2	SPAC1565.03	SPAC1565.03 sequence orphan	-0.100875
2445	7	6	SPCC338.02	SPCC338.02 mug112 sequence orphan	-0.100417
1275	4	6	SPBC21.05c	SPBC21.05c ral2 Ras guanyl-nucleotide exchange factor Ral2	-0.100384
1033	3	12	SPAC4C5.01	SPAC4C5.01 haloacid dehalogenase-like hydrolase	-0.100185
232	1	10	SPAC10F6.16	SPAC10F6.16 mug134 endosulphine family protein	-0.100126
1938	6	1	SPAC806.04c	SPAC806.04c DUF89 family protein	-0.100055
827	3	3	SPBC25B2.02c	SPBC25B2.02c mam1 M-factor transporter Mam1	-0.0998593
828	3	3	SPBC16H5.05c	SPBC16H5.05c cyp7 cyclophilin family peptidyl-prolyl cis-tr	-0.0995215
852	3	4	SPAPYUG7.03c	SPAPYUG7.03c mid2 anillin homologue Mid2	-0.0995215
1064	3	13	SPAC2F7.08c	SPAC2F7.08c snf5 chromatin remodeling complex subunit Snf5	-0.0994238
826	3	3	SPBC215.05	SPBC215.05 gpd1 glycerol-3-phosphate dehydrogenase Gpd1	-0.0986512
1286	4	6	SPBC1652.01	SPBC1652.01 conserved fungal protein	-0.0986446
1578	5	2	SPCC16A11.03c	SPCC16A11.03c conserved protein (fungal and protazoan)	-0.0986107
1893	5	15	SPCC757.07c	SPCC757.07c ctt1 catalase	-0.0984838
1063	3	13	SPCC757.04	SPCC757.04 transcription factor	-0.098297
1563	5	2	SPAC1D4.06c	SPAC1D4.06c csk1 cyclin-dependent kinase activating kinase	-0.0982143
806	3	2	SPBC15D4.10c	SPBC15D4.10c amo1 nuclear rim protein Amo1	-0.0977922
2338	7	2	SPAC1F7.13c	SPAC1F7.13c rpl801 60S ribosomal protein L8	-0.0977442
636	2	11	SPAC4G9.20c	SPAC4G9.20c mitochondrial carrier with solute carrier repe	-0.0974894
1446	4	13	SPAC1296.01c	SPAC1296.01c phosphoacetylglucosamine mutase	-0.0974179
381	1	16	SPBC2D10.06	SPBC2D10.06 rep1 MBF transcription factor complex subunit R	-0.0962192
2328	7	1	SPBC3E7.02c	SPBC3E7.02c hsp16 heat shock protein Hsp16	-0.096071
1821	5	12	SPBC947.09	SPBC947.09 ThiJ domain protein	-0.0958656
2076	6	7	SPAC19G12.09	SPAC19G12.09 NADH/NADPH dependent indole-3-acetaldehyde re	-0.0956807
2309	7	1	SPBC1921.04c	SPBC1921.04c sequence orphan	-0.0954826
628	2	11	SPAC328.09	SPAC328.09 2-oxoadipate and 2-oxoglutarate transporter	-0.095222
1386	4	10	SPCPB16A4.05c	SPCPB16A4.05c urease accessory protein UREG	-0.0949881
2238	6	14	SPBC3E7.07c	SPBC3E7.07c DUF757 family protein	-0.0947302
833	3	3	SPAC1805.04	SPAC1805.04 nup132 nucleoporin Nup132	-0.094523
2889	8	9	SPAC57A10.09c	SPAC57A10.09c High-mobility group non-histone chromatin pr	-0.0944419
2618	7	14	SPBC18H10.11c	SPBC18H10.11c conserved fungal protein	-0.0943964
214	1	9	SPBC83.19c	SPBC83.19c sequence orphan	-0.0942317
2731	8	2	SPBC2D10.13	SPBC2D10.13 est1 telomerase regulator Est1	-0.0940583
2037	6	5	SPCC736.09c	SPCC736.09c TRAX	-0.0940234
2979	8	13	SPBC1271.07c	SPBC1271.07c N-acetyltransferase	-0.0939223
1941	6	1	SPCC576.17c	SPCC576.17c membrane transporter	-0.0934468
180	1	8	SPBC8D2.17	6 SPBC8D2.17 alpha-1,2-galactosyltransferase"	-0.0934022
2859	8	8	SPBP23A10.02	SPBP23A10.02 conserved fungal protein	-0.0934019
1203	4	3	SPAC23H4.01c	SPAC23H4.01c sterol binding ankyrin repeat protein	-0.0933204
2367	7	3	SPAC4G9.12	SPAC4G9.12 gluconokinase	-0.093265
1001	3	10	SPCC285.16c	SPCC285.16c msh6 MutS protein homolog	-0.0931735
1665	5	6	SPAC5H10.09c	SPAC5H10.09c 3-methyl-2-oxobutanoate hydroxymethyltransfer	-0.0927619
1040	3	12	SPAC589.02c	SPAC589.02c med13 mediator complex subunit Srb9	-0.0921711
2166	6	11	SPBPB10D8.04c	SPBPB10D8.04c membrane transporter	-0.0920901
131	1	6	SPAC24H6.11c	SPAC24H6.11c sulfate transporter	-0.0916483
2833	8	7	SPBC16E9.06c	SPBC16E9.06c uvi31 BolA domain UV inducedv protein Uvi31	-0.0913414
885	3	5	SPAC1F5.09c	SPAC1F5.09c shk2 PAK-related kinase Shk2	-0.0913377
777	3	1	SPCC895.09c	SPCC895.09c ucp12 ATP-dependent RNA helicase Ucp1	-0.0912035
2165	6	11	SPAPB24D3.02c	3 SPAPB24D3.02c amino acid permease, unknown 3"	-0.0912006
3065	8	16	SPBC1685.08	SPBC1685.08 histone deacetylase complex subunit Cti6	-0.0909422
1663	5	6	SPAC4A8.04	SPAC4A8.04 isp6 vacuolar serine protease Isp6	-0.090861
431	2	2	SPBC2F12.11c	SPBC2F12.11c rep2 transcriptional activator Rep2	-0.0906326
2180	6	11	SPBC1A4.02c	SPBC1A4.02c leu1 3-isopropylmalate dehydrogenase Leu1	-0.0898664
2373	7	3	SPAC24B11.09	SPAC24B11.09 conserved eukaryotic protein	-0.0896166
2967	8	12	SPBC119.14	SPBC119.14 rti1 Rad22 homolog Rti1	-0.0894797
3038	8	15	SPAC959.08	SPAC959.08 rpl2102 60S ribosomal protein L21	-0.0893879
1814	5	12	SPAC212.01c	SPAC212.01c S. pombe specific DUF999 family protein 2	-0.0892943
2347	7	2	SPAPJ691.02	SPAPJ691.02 yippee-like protein	-0.0892817
66	1	3	SPBC23G7.16	SPBC23G7.16 ctr6 copper transporter Ctr6	-0.0891343
2391	7	4	SPAPB8E5.10	SPAPB8E5.10 sequence orphan	-0.0891091
2240	6	14	SPBC839.05c	SPBC839.05c rps1701 40S ribosomal protein S17	-0.0889769
1926	6	1	SPAC13G6.02c	SPAC13G6.02c rps101 40S ribosomal protein S3a	-0.0888974
54	1	3	SPAC8E11.04c	SPAC8E11.04c phospholipase	-0.0884721
84	1	4	SPBC146.12	SPBC146.12 coq6 monooxygenase Coq6	-0.0884699
929	3	7	SPBC1734.09	SPBC1734.09 NST UDP-N-acetylglucosamine transporter	-0.0881473
1717	5	8	SPBC12C2.07c	SPBC12C2.07c spermidine synthase	-0.0881459
532	2	7	SPAC328.04	2 SPAC328.04 AAA family ATPase, unknown biological role"	-0.0877193
2710	8	1	SPAC323.04	SPAC323.04 mitochondrial ATPase	-0.0876215
1031	3	11	SPAC1565.07c	SPAC1565.07c TATA binding protein interacting protein	-0.0875901
1471	4	14	SPBC354.05c	SPBC354.05c sre2 membrane-tethered transcription factor	-0.0875563
1962	6	2	SPBC1773.09c	SPBC1773.09c mug184 meiotically upregulated gene Mug184	-0.0872061
2752	8	3	SPBC25H2.14	SPBC25H2.14 mug16 UNC-50 family protein	-0.0870836
104	1	5	SPAPB17E12.05	SPAPB17E12.05 rpl3703 60S ribosomal protein L37	-0.0868978
134	1	6	SPAC4F10.07c	SPAC4F10.07c atg13 autophagy associated protein Atg13	-0.0868636
1015	3	11	SPCC74.06	SPCC74.06 mak3 histidine kinase Mak3	-0.0868614
752	2	16	SPBC543.10	SPBC543.10 GET complex subunit	-0.0867865
634	2	11	SPAC3H5.12c	SPAC3H5.12c rpl501 60S ribosomal protein L5	-0.0867072
515	2	6	SPBC17D1.07c	SPBC17D1.07c GTPase regulator	-0.0866873
714	2	14	SPBP8B7.25	SPBP8B7.25 cyp4 cyclophilin family peptidyl-prolyl cis-tran	-0.0866404
1153	4	1	SPCP31B10.06	SPCP31B10.06 mug190 C2 domain protein Tcb3	-0.0865369
292	1	13	SPAC823.02	SPAC823.02 sequence orphan	-0.0864807
664	2	12	SPBP16F5.05c	SPBP16F5.05c ribosome biogenesis protein Nop8	-0.0864343
35	1	2	SPAC23H4.02	SPAC23H4.02 ppk9 serine/threonine protein kinase Ppk9	-0.0864111
1696	5	7	SPAC2E1P3.02c	SPAC2E1P3.02c amt3 ammonium transporter Amt3	-0.086039
531	2	7	SPAC17A2.12	SPAC17A2.12 ATP-dependent DNA helicase	-0.0860324
2411	7	5	SPBP35G2.07	SPBP35G2.07 ilv1 acetolactate synthase catalytic subunit	-0.0859518
2415	7	5	SPAC926.03	SPAC926.03 rlc1 myosin II regulatory light chain	-0.0859518
171	1	8	SPCC1682.01	SPCC1682.01 qcr9 ubiquinol-cytochrome-c reductase complex s	-0.0858639
1553	5	1	SPBC651.05c	SPBC651.05c dot2 EAP30 family protein Dot2	-0.0855449
2962	8	12	SPAC1250.04c	SPAC1250.04c atl1 alkyltransferase-like protein Atl1	-0.085069
1474	4	14	SPAC25A8.02	SPAC25A8.02 sequence orphan	-0.0849735
938	3	8	SPAC19G12.02c	SPAC19G12.02c pms1 MutL family mismatch-repair protein Pms1	-0.0848156
1559	5	1	SPCC794.01c	SPCC794.01c glucose-6-phosphate 1-dehydrogenase	-0.0844509
2641	7	15	SPBC1347.13c	SPBC1347.13c ribose methyltransferase	-0.0843561
987	3	10	SPAC637.06	2 SPAC637.06 alpha-1,2-galactosyltransferase"	-0.0843263
1062	3	13	SPAC16E8.09	SPAC16E8.09 scd1 RhoGEF Scd1	-0.0843254
163	1	7	SPAC22F3.07c	SPAC22F3.07c atp20 F0-ATPase subunit G	-0.084286
2397	7	4	SPCC23B6.05c	SPCC23B6.05c ssb3 DNA replication factor A subunit Ssb3	-0.0842167
2521	7	10	SPAC6B12.14c	SPAC6B12.14c conserved fungal protein	-0.083877
2235	6	14	SPCC550.08	SPCC550.08 N-acetyltransferase	-0.0831055
2032	6	5	SPAC4A8.02c	SPAC4A8.02c conserved protein (broad species distribution)	-0.0816703
2547	7	11	SPBC1718.07c	SPBC1718.07c zfs1 transcription factor Zfs1	-0.0814899
2723	8	2	SPAC22H10.08	SPAC22H10.08 conserved protein	-0.0808648
1713	5	8	SPAC5H10.13c	5 SPAC5H10.13c gmh2 alpha-1,2-galactosyltransferase Gmh2"	-0.0807453
3024	8	14	SPAC17C9.05c	SPAC17C9.05c pmc3 mediator complex subunit Pmc3	-0.0805389
2936	8	11	SPBC27.06c	SPBC27.06c mgr2 mitochondrial membrane protein Mgr1	-0.0800588
1237	4	4	SPBC8E4.03	SPBC8E4.03 agmatinase 2	-0.0798494
189	1	8	SPBC29A10.02	SPBC29A10.02 spo5 meiotic RNA-binding protein 1	-0.079846
736	2	15	SPAC694.02	SPAC694.02 DEAD/DEAH box helicase	-0.0797782
294	1	13	SPAPB17E12.02	SPAPB17E12.02 yip12 SMN family protein Yip12	-0.0797468
1542	5	1	SPAC3H1.07	SPAC3H1.07 arginase	-0.0797448
2243	6	14	SPAC1039.04	SPAC1039.04 nicotinic acid plasma membrane transporter	-0.0797367
705	2	14	SPBC1773.03c	SPBC1773.03c aminotransferase class-III	-0.079735
2534	7	10	SPBC543.08	SPBC543.08 phosphoinositide biosynthesis protein	-0.0793002
1961	6	2	SPAC11G7.04	SPAC11G7.04 ubi1 ribosomal-ubiquitin fusion protein Ubi1	-0.0792783
1037	3	12	SPBC18H10.06c	SPBC18H10.06c swd2 COMPASS complex subunit Swd2	-0.0792349
2213	6	13	SPAPB24D3.08c	SPAPB24D3.08c NADP-dependent oxidoreductase	-0.0791405
503	2	5	SPAC26F1.02	SPAC26F1.02 pinin homologue	-0.0790819
2483	7	8	SPAC6C3.05	SPAC6C3.05 sequence orphan	-0.0784882
1561	5	2	SPAC18B11.02c	SPAC18B11.02c pseudouridylate synthase	-0.0773456
2698	8	1	SPCC364.04c	SPCC364.04c CASP family protein	-0.0767158
1948	6	2	SPBC1604.20c	SPBC1604.20c tea2 kinesin-like protein Tea2	-0.0762707
21	1	1	SPAC23C4.17	SPAC23C4.17 tRNA (cytosine-5-)-methyltransferase	-0.0762657
1292	4	6	SPAC110.02	SPAC110.02 pds5 cohesin-associated protein Pds5	-0.0760504
2891	8	9	SPCC1672.04c	SPCC1672.04c mitochondrial copper ion transport protein	-0.0760397
2904	8	9	SPBC25B2.08	SPBC25B2.08 sequence orphan	-0.0757774
968	3	9	SPBC1709.14	SPBC1709.14 peptide N-glycanase	-0.0756603
683	2	13	SPAC1F3.05	SPAC1F3.05 adaptin	-0.0755686
835	3	3	SPAC2F7.02c	SPAC2F7.02c phosphoprotein phosphatase	-0.0749079
2651	7	15	SPAC1F7.10	SPAC1F7.10 hydantoin racemase family	-0.0743798
1775	5	10	SPCC1753.03c	SPCC1753.03c rec7 meiotic recombination protein Rec7	-0.07426
2371	7	3	SPAC18G6.01c	SPAC18G6.01c conserved fungal protein	-0.0741096
219	1	10	SPCC16C4.04	SPCC16C4.04 sequence orphan	-0.07364
1111	3	15	SPCC895.05	SPCC895.05 for3 formin For3	-0.0734835
2776	8	4	SPAC22F8.09	SPAC22F8.09 rrp16 rRNA processing protein Rrp16	-0.0732954
956	3	8	SPBPB10D8.01	SPBPB10D8.01 cysteine transporter	-0.0728802
1196	4	2	SPBC8E4.04	SPBC8E4.04 aldo/keto reductase involved in pentose catabol	-0.0726792
1730	5	9	SPCC1739.08c	SPCC1739.08c short chain dehydrogenase	-0.0722099
600	2	9	SPACUNK4.11c	SPACUNK4.11c sequence orphan	-0.0719782
406	2	1	SPAC890.03	SPAC890.03 ppk16 serine/threonine protein kinase Ppk16	-0.0718623
1241	4	4	SPCC1442.16c	SPCC1442.16c zta1 quinone oxidoreductase	-0.0718096
1291	4	6	SPCC18.02	SPCC18.02 membrane transporter	-0.0718096
1445	4	13	SPBC25H2.16c	SPBC25H2.16c adaptin	-0.0716621
2191	6	12	SPAC1D4.09c	SPAC1D4.09c DUF602 family protein	-0.0714195
2784	8	4	SPBC577.11	SPBC577.11 sequence orphan	-0.0713071
1097	3	14	SPCC306.04c	SPCC306.04c set1 histone lysine methyltransferase Set1	-0.0712655
1816	5	12	SPBC1604.12	SPBC1604.12 sequence orphan	-0.0708414
372	1	16	SPAC23C4.03	SPAC23C4.03 haspin related kinase	-0.0708154
404	2	1	SPAC821.07c	SPAC821.07c moc3 transcription factor Moc3	-0.0705717
847	3	4	SPAC823.10c	SPAC823.10c mitochondrial carrier with solute carrier repe	-0.0705191
64	1	3	SPBC18E5.14c	SPBC18E5.14c sequence orphan	-0.0703866
2435	7	6	SPAC3H1.08c	SPAC3H1.08c DUF1640 family protein	-0.0703268
2306	7	1	SPBC15C4.06c	SPBC15C4.06c ubiquitin-protein ligase E3	-0.0702817
101	1	5	SPAC2F3.18c	SPAC2F3.18c sequence orphan	-0.0701666
1368	4	9	SPBC1685.15c	SPBC1685.15c klp6 kinesin-like protein Klp6	-0.06978
2462	7	7	SPAC4D7.07c	SPAC4D7.07c sequence orphan	-0.0697169
1523	4	16	SPBC839.06	6 SPBC839.06 cta3 P-type ATPase, calcium transporting Cta3"	-0.0696031
2599	7	13	SPCC1442.13c	SPCC1442.13c RNA-binding protein	-0.0692987
139	1	6	SPBC16D10.05	0 SPBC16D10.05 mok13 alpha-1,3-glucan synthase Mok13"	-0.0691788
1374	4	10	SPBC947.04	SPBC947.04 DIPSY family	-0.0688119
427	2	2	SPBC25B2.03	SPBC25B2.03 zf-C3HC4 type zinc finger	-0.0685183
579	2	9	SPAC17A5.11	SPAC17A5.11 rec12 endonuclease Rec12	-0.0684885
2089	6	8	SPBPB10D8.05c	SPBPB10D8.05c membrane transporter	-0.0684654
334	1	14	SPAC14C4.05c	SPAC14C4.05c mug61 Sad1 interacting factor	-0.0683651
1217	4	3	SPAC2G11.13	SPAC2G11.13 atg22 autophagy associated protein Atg22	-0.0682245
14	1	1	SPBC1685.10	SPBC1685.10 rps27 40S ribosomal protein S27	-0.0677163
1177	4	2	SPBC1709.13c	SPBC1709.13c lysine methyltransferase	-0.0676928
2416	7	5	SPBC8D2.11	SPBC8D2.11 sequence orphan	-0.0671694
2548	7	11	SPCC736.02	SPCC736.02 sequence orphan	-0.0662079
1937	6	1	SPCC1442.07c	SPCC1442.07c ubiquitin/metalloprotease fusion protein	-0.0661564
2892	8	9	SPBC12D12.02c	SPBC12D12.02c cdm1 DNA polymerase delta subunit Cdm1	-0.0658267
316	1	14	SPCC1322.14c	SPCC1322.14c vtc4 vacuolar transporter chaperone (VTC) comp	-0.0653136
2007	6	4	SPBC2A9.02	SPBC2A9.02 NAD dependent epimerase/dehydratase family prot	-0.0652508
1416	4	11	SPBC16A3.19	SPBC16A3.19 histone acetyltransferase complex subunit Eaf7	-0.0651419
2720	8	2	SPAC644.09	SPAC644.09 alanine racemase	-0.0651181
2756	8	3	SPBC577.12	SPBC577.12 mug71 endoribonuclease	-0.0651181
2014	6	4	SPAC25G10.05c	SPAC25G10.05c his1 ATP phosphoribosyltransferase	-0.0650881
2593	7	13	SPBC1271.03c	SPBC1271.03c phosphoprotein phosphatase	-0.0650165
2068	6	7	SPAC140.04	SPAC140.04 conserved fungal protein	-0.0648112
783	3	1	SPAC17G6.06	SPAC17G6.06 rps2401 40S ribosomal protein S24	-0.0647151
1983	6	3	SPBCPT2R1.01c	SPBCPT2R1.01c S. pombe specific DUF999 protein family 9	-0.0646699
2054	6	6	SPAC3H8.08c	SPAC3H8.08c transcription factor	-0.0646699
1679	5	6	SPCC1223.12c	SPCC1223.12c meu10 conserved fungal family	-0.0645953
2009	6	4	SPAC12B10.11	9 SPAC12B10.11 exg2 glucan 1,3-beta-glucosidase Exg2"	-0.0645161
2690	8	1	SPBC776.14	SPBC776.14 plh1 phospholipid-diacylglycerol acyltransferase	-0.0644854
2907	8	10	SPAC23H3.14	SPAC23H3.14 LAlv9 family protein	-0.064234
620	2	10	SPBPJ4664.03	SPBPJ4664.03 mfm3 M-factor precursor Mfm3	-0.0642223
2034	6	5	SPACUNK4.09	SPACUNK4.09 conserved protein	-0.064089
1266	4	5	SPAC589.05c	SPAC589.05c conserved eukaryotic protein	-0.0640742
2402	7	5	SPBC215.03c	SPBC215.03c csn1 COP9/signalosome complex subunit Csn1	-0.0638007
2061	6	6	SPAC4F10.17	SPAC4F10.17 conserved fungal protein	-0.0637985
1061	3	13	SPCC63.04	3 SPCC63.04 mok14 alpha-1,3-glucan synthase Mok14"	-0.0636708
2736	8	2	SPAC9.11	SPAC9.11 sequence orphan	-0.0635412
3003	8	14	SPBC2D10.03c	SPBC2D10.03c DUF866 domain protein	-0.0635412
2003	6	4	SPBC106.17c	SPBC106.17c cys2 homoserine O-acetyltransferase	-0.063532
475	2	4	SPBC25B2.04c	SPBC25B2.04c mitochondrial ribosome assembly protein	-0.0631844
2392	7	4	SPBC18H10.16	8 SPBC18H10.16 amino acid permease, unknown 9"	-0.0630135
781	3	1	SPAC15F9.02	SPAC15F9.02 seh1 nucleoporin Seh1	-0.0629981
3057	8	16	SPAC22A12.16	SPAC22A12.16 ATP-citrate synthase subunit 2	-0.0627741
263	1	11	SPAC4H3.06	SPAC4H3.06 sequence orphan	-0.0625441
1979	6	3	SPBC28F2.05c	SPBC28F2.05c xylose and arabinose reductase	-0.0624721
2422	7	5	SPBC18H10.08c	SPBC18H10.08c ubp4 ubiquitin C-terminal hydrolase Ubp4	-0.0622005
3064	8	16	SPAC3F10.09	SPAC3F10.09 1-(5-phosphoribosyl)-5-[(5-phosphoribosylamino	-0.0619225
1314	4	7	SPAC5H10.10	SPAC5H10.10 NADPH dehydrogenase	-0.0618791
2762	8	4	SPCC18.13	SPCC18.13 tRNA (guanine-N7-)-methyltransferase subunit Trm	-0.0617768
2497	7	9	SPAPB8E5.08	SPAPB8E5.08 sequence orphan	-0.0614199
1234	4	4	SPAC11G7.06c	SPAC11G7.06c mug132 S. pombe specific UPF0300 family protei	-0.061337
2508	7	9	SPAC17C9.15c	SPAC17C9.15c sequence orphan	-0.0610363
2987	8	13	SPCC191.06	SPCC191.06 sequence orphan	-0.0609928
2925	8	10	SPBP23A10.05	SPBP23A10.05 ssr4 SWI/SNF and RSC complex subunit Ssr4	-0.0609852
1585	5	3	SPAC1952.11c	SPAC1952.11c ure2 urease	-0.0607595
1537	5	1	SPAC186.01	SPAC186.01 DIPSY family	-0.0607132
2248	6	14	SPAC4F10.14c	SPAC4F10.14c btf3 nascent polypeptide-associated complex su	-0.0606889
327	1	14	SPAPB24D3.01	SPAPB24D3.01 transcription factor	-0.0605745
1141	3	16	SPBC25D12.05	7 SPBC25D12.05 trm1 N2,N2-dimethylguanosine tRNA methyltrans	-0.0605125
2325	7	1	SPAC23A1.14c	SPAC23A1.14c cystathionine gamma-synthase	-0.060491
332	1	14	SPAC13C5.03	SPAC13C5.03 tht1 nuclear membrane protein involved in karyo	-0.060487
358	1	15	SPBC8D2.02c	SPBC8D2.02c vacuolar sorting protein Vps68	-0.060487
451	2	3	SPAC23C4.02	0 SPAC23C4.02 crn1 actin binding protein, coronin Crn1"	-0.0602642
1243	4	4	SPCC1795.09	SPCC1795.09 yps1 aspartic protease Yps1	-0.0601847
832	3	3	SPAC9.07c	SPAC9.07c GTPase Rbg1	-0.0600099
836	3	3	SPBC2G2.17c	SPBC2G2.17c beta-glucosidase Psu2	-0.0600099
3067	8	16	SPBC18E5.10	SPBC18E5.10 iron sulfur cluster assembly protein	-0.0600065
1372	4	10	SPAC18B11.10	SPAC18B11.10 tup11 transcriptional corepressor Tup11	-0.0598768
2340	7	2	SPBC19G7.03c	SPBC19G7.03c rps3002 40S ribosomal protein S30	-0.0598562
2269	6	15	SPBC947.05c	SPBC947.05c ferric-chelate reductase	-0.0598321
568	2	8	SPBC9B6.09c	SPBC9B6.09c mdl1 mitochondrial peptide-transporting ATPase	-0.0594784
1894	5	15	SPAC12G12.10	1 SPAC12G12.10 WD repeat protein, human WDR21 family"	-0.0593412
498	2	5	SPAC6F12.12	SPAC6F12.12 par2 protein phosphatase regulatory subunit Par	-0.0592828
522	2	6	SPBP35G2.10	SPBP35G2.10 mit1 SHREC complex subunit Mit1	-0.0592828
1115	3	15	SPCC1739.14	SPCC1739.14 npp106 nucleoporin Npp106	-0.0586735
284	1	12	SPAC13A11.05	SPAC13A11.05 peptidase family M17	-0.0585174
2134	6	9	SPBC2G5.06c	SPBC2G5.06c hmt2 sulfide-quinone oxidoreductase	-0.0582654
1682	5	7	SPBC21D10.12	SPBC21D10.12 hob1 BAR adaptor protein Hob1	-0.0580318
2437	7	6	SPAC4A8.07c	SPAC4A8.07c sphingoid long chain base (LCB) kinase	-0.0578591
805	3	2	SPAC3H8.05c	SPAC3H8.05c conserved fungal protein	-0.0576727
3025	8	15	SPBC29A3.12	SPBC29A3.12 rps902 40S ribosomal protein S9	-0.0574999
2538	7	10	SPBC405.05	SPBC405.05 sequence orphan	-0.0573737
1737	5	9	SPAC977.11	SPAC977.11 conserved fungal protein	-0.0572064
1619	5	4	SPAC922.05c	SPAC922.05c membrane transporter	-0.057131
3002	8	14	SPBC1711.08	SPBC1711.08 chaperone activator Aha1	-0.0569908
670	2	12	SPCC1223.13	SPCC1223.13 cbf12 transcription factor	-0.0569332
2801	8	5	SPAC1F5.05c	SPAC1F5.05c sequence orphan	-0.0563224
704	2	14	SPBC543.05c	SPBC543.05c inorganic anion exchanger	-0.0561504
1702	5	7	SPAC7D4.04	SPAC7D4.04 taf1 Taz1 interacting factor 1	-0.0556006
229	1	10	SPAC328.05	SPAC328.05 RNA-binding protein involved in export of mRNAs	-0.0552657
1693	5	7	SPBC29B5.04c	SPBC29B5.04c conserved fungal protein	-0.0552006
92	1	4	SPAC12B10.09	SPAC12B10.09 S-adenosylmethionine transporter	-0.0548645
598	2	9	SPAC8E11.03c	SPAC8E11.03c dmc1 RecA family ATPase Dmc1	-0.0546559
591	2	9	SPAC22E12.14c	SPAC22E12.14c sck2 serine/threonine protein kinase Sck2	-0.0543185
450	2	3	SPAC6B12.07c	SPAC6B12.07c ubiquitin-protein ligase E3	-0.0542382
932	3	7	SPAC26H5.02c	SPAC26H5.02c DNA replication ATPase	-0.0540182
2065	6	7	SPAC25B8.15c	SPAC25B8.15c wybutosine biosynthesis protein Tyw3	-0.053993
1348	4	9	SPBC18E5.05c	SPBC18E5.05c RNA polymerase II elongator complex subunit	-0.0539909
1073	3	13	SPBC1734.06	SPBC1734.06 rhp18 Rad18 homolog Rhp18	-0.0539761
491	2	5	SPAC19B12.11c	SPAC19B12.11c zinc finger protein	-0.0538819
738	2	15	SPAC821.06	SPAC821.06 spn2 septin Spn2	-0.0535786
1686	5	7	SPBC1289.14	SPBC1289.14 adducin	-0.053564
1077	3	13	SPAC922.03	SPAC922.03 1-aminocyclopropane-1-carboxylate deaminase	-0.0533669
1987	6	3	SPCC24B10.10c	SPCC24B10.10c mitochondrial outer membrane ATPase Msp1	-0.0533078
1191	4	2	SPCC1020.10	SPCC1020.10 oca2 serine/threonine protein kinase Oca2	-0.0529148
1470	4	14	SPCC417.12	SPCC417.12 carboxylesterase-lipase family	-0.0527004
673	2	13	SPAC1782.01	SPAC1782.01 proteasome component	-0.0525409
2307	7	1	SPBC13G1.04c	SPBC13G1.04c alkB homolog	-0.0517678
1890	5	15	SPBC418.02	SPBC418.02 NatA N-acetyltransferase complex subunit	-0.051601
2499	7	9	SPBC1711.12	SPBC1711.12 serine peptidase	-0.0514053
2931	8	11	SPBC11C11.06c	SPBC11C11.06c sequence orphan	-0.0508983
2094	6	8	SPBC2A9.05c	SPBC2A9.05c DUF846 family protein	-0.0508541
141	1	6	SPBC28F2.11	SPBC28F2.11 INO80 complex subunit	-0.0508124
982	3	9	SPAC17A2.14	SPAC17A2.14 CorA family magnesium ion transporter	-0.0506334
2434	7	6	SPAC29A4.19c	SPAC29A4.19c P-type ATPase	-0.0505459
837	3	3	SPAC12B10.05	SPAC12B10.05 metallopeptidase	-0.0504676
1580	5	2	SPAC1002.06c	SPAC1002.06c bqt2 bouquet formation protein Bqt2	-0.0501737
2505	7	9	SPCC576.12c	SPCC576.12c conserved eukaryotic protein	-0.0500267
2424	7	5	SPAC17A5.05c	SPAC17A5.05c conserved fungal protein	-0.0498992
2890	8	9	SPBC19G7.17	SPBC19G7.17 translocon subunit Sec61 homolog	-0.0493714
733	2	15	SPAC222.15	SPAC222.15 meu13 Tat binding protein 1(TBP-1)-interacting p	-0.0490936
209	1	9	SPAC18B11.08c	SPAC18B11.08c conserved fungal protein	-0.0487691
905	3	6	SPCC1827.07c	SPCC1827.07c SPX/EXS domain protein	-0.0487544
676	2	13	SPAC328.10c	SPAC328.10c rps502 40S ribosomal protein S5	-0.048583
1826	5	13	SPBC428.08c	SPBC428.08c clr4 histone H3 methyltransferase Clr4	-0.048502
2449	7	7	SPAPB24D3.03	SPAPB24D3.03 agmatinase	-0.0483871
2608	7	13	SPCC1442.04c	SPCC1442.04c conserved fungal protein	-0.0483861
345	1	15	SPBC2A9.13	SPBC2A9.13 sequence orphan	-0.0482589
2056	6	6	SPAC328.03	8 SPAC328.03 tps1 alpha,alpha-trehalose-phosphate synthase [	-0.04796
1443	4	13	SPAC18G6.10	SPAC18G6.10 chromosome segregation protein	-0.0478885
2414	7	5	SPAC3H8.04	SPAC3H8.04 chromosome segregation protein	-0.0477885
1959	6	2	SPAC683.02c	SPAC683.02c zf-CCHC type zinc finger protein	-0.0476695
430	2	2	SPCC1183.04c	SPCC1183.04c pet127 mitochondrial membrane protein Pet127	-0.0476646
90	1	4	SPAC11D3.18c	SPAC11D3.18c nicotinic acid plasma membrane transporter	-0.0476032
2085	6	7	SPCC737.05	SPCC737.05 peroxin Pex28/29	-0.047567
2115	6	9	SPAC4H3.14c	SPAC4H3.14c sequence orphan	-0.047538
2030	6	5	SPAC23G3.10c	SPAC23G3.10c ssr3 SWI/SNF and RSC complex subunit Ssr3	-0.047379
2924	8	10	SPAC22E12.18	SPAC22E12.18 conserved fungal protein	-0.0472996
2520	7	9	SPAC17C9.10	SPAC17C9.10 stm1 G-protein coupled receptor Stm1	-0.0472922
1360	4	9	SPAC3H5.04	SPAC3H5.04 aar2 U5 snRNP-associated protein Aar2	-0.0471
883	3	5	SPCC338.06c	SPCC338.06c heat shock protein Hsp20 family	-0.0469332
822	3	3	SPAC22H10.09	SPAC22H10.09 sequence orphan	-0.0469143
975	3	9	SPAC17G6.15c	SPAC17G6.15c MTC tricarboxylate transporter	-0.0464391
1604	5	3	SPBC6B1.05c	SPBC6B1.05c ubiquitin-like conjugating enzyme	-0.0463732
2106	6	8	SPBC4B4.12c	SPBC4B4.12c sequence orphan	-0.0460781
1281	4	6	SPBC3E7.09	SPBC3E7.09 Sad1-UNC-like C-terminal	-0.0459511
877	3	5	SPBC428.12c	SPBC428.12c RNA-binding protein	-0.0455332
840	3	3	SPBC3F6.01c	SPBC3F6.01c serine/threonine protein phosphatase	-0.045483
2980	8	13	SPCC1223.01	SPCC1223.01 ubiquitin-protein ligase E3	-0.0453162
2679	7	16	SPBC409.20c	SPBC409.20c psh3 ER chaperone SHR3 homologue Psh3	-0.0452637
36	1	2	SPBC36.10	SPBC36.10 mitochondrial intermembrane space protein sortin	-0.0451196
2531	7	10	SPBC1539.07c	SPBC1539.07c glutathione-dependent formaldehyde dehydrogen	-0.0450479
787	3	1	SPAC3C7.10	SPAC3C7.10 pex13 peroxin-13	-0.0450233
2852	8	7	SPBC839.02	SPBC839.02 arrestin Aly1 related	-0.0449735
1709	5	8	SPAC27F1.08	SPAC27F1.08 pdt1 Nramp family manganese ion transporter	-0.0447901
213	1	9	SPAC29A4.17c	SPAC29A4.17c FUN14 family protein	-0.0447824
2101	6	8	SPAPB24D3.04c	SPAPB24D3.04c mag1 DNA-3-methyladenine glycosylase Mag1	-0.0444073
34	1	2	SPCC777.04	SPCC777.04 amino acid transporter	-0.0439339
609	2	10	SPBC1703.06	SPBC1703.06 pof10 F-box protein Pof10	-0.0438579
2757	8	3	SPBC839.03c	SPBC839.03c neddylation protein Dcn1	-0.0438481
448	2	3	SPAC637.07	SPAC637.07 moe1 translation initiation factor eIF3d Moe1	-0.0435223
778	3	1	SPAC56F8.04c	SPAC56F8.04c coq2 para-hydroxybenzoate--polyprenyltransfera	-0.0434993
412	2	2	SPBC336.03	SPBC336.03 efc25 exchange factor Cdc25p-like	-0.0434286
2348	7	2	SPCC320.14	SPCC320.14 threo-3-hydroxyaspartate ammonia-lyase	-0.0432327
2410	7	5	SPCC4G3.17	SPCC4G3.17 HD domain	-0.0432327
2844	8	7	SPAC2C4.10c	SPAC2C4.10c sequence orphan	-0.043129
86	1	4	SPAC20G8.09c	SPAC20G8.09c N-acetyltransferase Nat10	-0.0426132
369	1	16	SPAC23G3.03	SPAC23G3.03 sib2 ornithine N5 monooxygenase	-0.0425893
571	2	8	SPBC25H2.08c	SPBC25H2.08c mrs2 magnesium ion transporter Mrs2	-0.0424935
216	1	9	SPBP4H10.08	SPBP4H10.08 qcr10 ubiquinol-cytochrome-c reductase complex	-0.0423552
1038	3	12	SPAC32A11.02c	SPAC32A11.02c conserved fungal protein	-0.0422564
428	2	2	SPBPB2B2.05	SPBPB2B2.05 GMP synthase [glutamine-hydrolyzing]	-0.0420053
2071	6	7	SPBC16C6.03c	SPBC16C6.03c sequence orphan	-0.0418744
2753	8	3	SPAC2E1P5.02c	SPAC2E1P5.02c mug109 sequence orphan	-0.0418523
1164	4	1	SPAC222.07c	SPAC222.07c hri2 eIF2 alpha kinase Hri2	-0.0411609
293	1	13	SPAC3G6.13c	SPAC3G6.13c rpl4101 60S ribosomal protein L41	-0.0407916
310	1	13	SPBC887.08	SPBC887.08 sequence orphan	-0.0406165
1344	4	8	SPAC16E8.13	SPAC16E8.13 ubiquitin-protein ligase E3	-0.0405691
2333	7	2	SPBC31F10.15c	SPBC31F10.15c atp15 F0-ATPase epsilon subunit	-0.0403987
2865	8	8	SPAC2F7.17	SPAC2F7.17 peptide chain release factor	-0.0403253
1352	4	9	SPAC16E8.14c	SPAC16E8.14c methyltransferase	-0.0402092
2337	7	2	SPAC3G6.01	SPAC3G6.01 hrp3 ATP-dependent DNA helicase Hrp3	-0.0400753
2420	7	5	SPAC8C9.10c	SPAC8C9.10c ribosome biogenesis protein Rrp14-N	-0.0400753
509	2	6	SPBC1347.03	SPBC1347.03 meu14 sporulation protein Meu14	-0.0395892
1140	3	16	SPBC15D4.07c	SPBC15D4.07c atg9 autophagy associated protein Atg9	-0.0390776
859	3	4	SPCC663.14c	SPCC663.14c membrane transporter	-0.0385736
2693	8	1	SPBC1709.01	SPBC1709.01 chs2 chitin synthase homolog Chs2	-0.0384897
1650	5	5	SPBC16C6.01c	SPBC16C6.01c lysine methyltransferase	-0.0384199
829	3	3	SPBC902.04	SPBC902.04 RNA-binding protein	-0.0383784
1868	5	14	SPAC11E3.13c	0 SPAC11E3.13c 1,3-beta-glucanosyltransferase"	-0.0382678
853	3	4	SPAC4A8.10	SPAC4A8.10 lipase	-0.0381614
530	2	7	SPAC29A4.13	SPAC29A4.13 urease accessory protein UreF	-0.0381054
476	2	4	SPBPB2B2.10c	SPBPB2B2.10c galactose-1-phosphate uridylyltransferase	-0.0379718
553	2	8	SPAPB8E5.05	SPAPB8E5.05 mfm1 M-factor precursor Mfm1	-0.0378825
2812	8	6	SPBC2D10.19c	SPBC2D10.19c sequence orphan	-0.0375627
416	2	2	SPBC428.15	SPBC428.15 GTP binding protein	-0.0372432
79	1	4	SPAC105.03c	SPAC105.03c transcription factor	-0.0369847
2087	6	7	SPBC106.03	SPBC106.03 DUF1776 family protein	-0.036885
1156	4	1	SPAC30D11.05	SPAC30D11.05 aps3 AP-3 adaptor complex subunit Aps3	-0.0368783
399	2	1	SPAC227.03c	SPAC227.03c mitochondrial NAD+ transporter	-0.0367746
480	2	4	SPCC126.12	SPCC126.12 NGG1p interacting factor 3 family	-0.0367746
529	2	7	SPAC16A10.02	SPAC16A10.02 transcription coactivator Sub1	-0.0367746
2095	6	8	SPAC30C2.07	SPAC30C2.07 sequence orphan	-0.0367543
611	2	10	SPBC17G9.05	SPBC17G9.05 rct1 cyclophilin family peptidyl-prolyl cis-tra	-0.0367498
2490	7	8	SPBC31F10.08	SPBC31F10.08 mde2 Mde2 protein	-0.0366882
2703	8	1	SPBC11B10.08	SPBC11B10.08 conserved fungal protein	-0.0364736
1787	5	11	SPBC16A3.03c	SPBC16A3.03c lyn1 sequence orphan	-0.0364686
879	3	5	SPBC776.17	SPBC776.17 rRNA processing protein Rrp7	-0.036006
635	2	11	SPAC1D4.13	SPAC1D4.13 byr1 MAP kinase kinase Byr1	-0.0359553
643	2	11	SPAC23E2.01	SPAC23E2.01 fep1 iron-sensing transcription factor Fep1	-0.0359553
920	3	7	SPBC17D11.04c	SPBC17D11.04c histone acetyltransferase complex subunit Nt	-0.0357133
2733	8	2	SPBC557.05	SPBC557.05 arrestin	-0.0354887
2541	7	10	SPAC11D3.02c	SPAC11D3.02c ELLA family acetyltransferase	-0.0353826
93	1	4	SPBC26H8.12	SPBC26H8.12 cytochrome c heme lyase	-0.0352801
2315	7	1	SPAC521.05	SPAC521.05 rps802 40S ribosomal protein S8	-0.0352767
1568	5	2	SPAC23H4.09	SPAC23H4.09 cdb4 curved DNA-binding protein Cdb4	-0.0349559
53	1	3	SPAC27F1.10	SPAC27F1.10 sequence orphan	-0.0349107
1688	5	7	SPBC4C3.08	SPBC4C3.08 mug136 acetylglucosaminyltransferase	-0.0349026
1186	4	2	SPBC32H8.07	SPBC32H8.07 git5 heterotrimeric G protein beta subunit Git5	-0.0347689
1441	4	13	SPAC13F5.01c	SPAC13F5.01c msh1 MutS protein homolog 1	-0.034695
3021	8	14	SPBC17D11.01	SPBC17D11.01 nep1 nedd8 protease Nep1	-0.0345476
989	3	10	SPAC6F12.09	SPAC6F12.09 rdp1 RNA-directed RNA polymerase Rdp1	-0.0344654
402	2	1	SPAC6B12.04c	SPAC6B12.04c aminotransferase class I and II	-0.0342159
1852	5	14	SPCC736.04c	2 SPCC736.04c gma12 alpha-1,2-galactosyltransferase Gma12"	-0.0340851
2942	8	11	SPAC2E1P3.05c	SPAC2E1P3.05c fungal cellulose binding domain protein	-0.0336247
1525	4	16	SPBPB7E8.01	SPBPB7E8.01 sequence orphan	-0.03302
2440	7	6	SPAC11H11.05c	SPAC11H11.05c fta6 Sim4 and Mal2 associated (4 and 2 associ	-0.0327621
337	1	15	SPAC1786.04	SPAC1786.04 sequence orphan	-0.0325633
963	3	9	SPCC338.11c	SPCC338.11c rrg1 methyltransferase	-0.0324236
677	2	13	SPAC17H9.14c	SPAC17H9.14c protein disulfide isomerase	-0.0323887
249	1	11	SPBC19G7.02	SPBC19G7.02 4-amino-4-deoxychorismate lyase	-0.0323831
1779	5	11	SPAC25B8.17	SPAC25B8.17 peptidase family A22	-0.0320661
2587	7	12	SPAC29B12.13	SPAC29B12.13 carbon-sulfur lyase	-0.0318563
2396	7	4	SPCC70.08c	SPCC70.08c methyltransferase	-0.0317635
2028	6	5	SPAC1952.10c	SPAC1952.10c conserved fungal protein	-0.0315405
2425	7	6	SPAC29B12.12	SPAC29B12.12 helper of TIM (Predicted)	-0.031466
371	1	16	SPAC29B12.03	SPAC29B12.03 spd1 ribonucleotide reductase (RNR) inhibitor	-0.0312834
2676	7	16	SPCC297.06c	SPCC297.06c mitochondrial ribosomal protein subunit 8	-0.0312004
2066	6	7	SPCC24B10.14c	SPCC24B10.14c xlf1 xrcc4 like factor	-0.0304892
2598	7	13	SPBC902.05c	SPBC902.05c idh2 isocitrate dehydrogenase (NAD+) subunit 2	-0.0300406
2075	6	7	SPBC31F10.03	SPBC31F10.03 ChaC-like protein	-0.0299113
878	3	5	SPAC521.04c	SPAC521.04c calcium permease	-0.0298408
2012	6	4	SPAC1610.01	SPAC1610.01 conserved fungal protein	-0.0297977
1027	3	11	SPBC15D4.01c	SPBC15D4.01c kinesin-like protein	-0.0297185
708	2	14	SPBC725.01	SPBC725.01 aspartate aminotransferase	-0.0296601
678	2	13	SPAC3C7.04	SPAC3C7.04 transcription factor	-0.029551
1236	4	4	SPAC1B3.10c	6 SPAC1B3.10c SEL1 repeat protein, unknown biological role"	-0.0292995
276	1	12	SPBC1685.11	SPBC1685.11 rlp1 RecA family ATPase Rlp1	-0.0288869
1840	5	13	SPAC5H10.06c	SPAC5H10.06c adh4 alcohol dehydrogenase Adh4	-0.0283717
2613	7	13	SPAC8E11.01c	SPAC8E11.01c beta-fructofuranosidase	-0.0283632
1564	5	2	SPCC594.02c	SPCC594.02c conserved fungal protein	-0.0280596
2705	8	1	SPCC320.06	SPCC320.06 sequence orphan	-0.0279971
820	3	3	SPBC21B10.13c	SPBC21B10.13c transcription factor	-0.0278442
468	2	4	SPBC660.12c	SPBC660.12c peptide epimerase	-0.0277524
2409	7	5	SPCC285.10c	SPCC285.10c SPRY domain protein	-0.0276077
2181	6	11	SPCC965.08c	SPCC965.08c alr1 alanine racemase Alr1	-0.027574
18	1	1	SPBC23G7.15c	SPBC23G7.15c rpp202 60S acidic ribosomal protein P2B subuni	-0.0275276
3046	8	15	SPBC16G5.09	SPBC16G5.09 serine carboxypeptidase	-0.0275063
1767	5	10	SPBC17A3.03c	SPBC17A3.03c phosphoprotein phosphatase	-0.0274086
1710	5	8	SPCC777.12c	SPCC777.12c sequence orphan	-0.0273539
605	2	10	SPBC13E7.09	SPBC13E7.09 vrp1 verprolin	-0.0271817
2722	8	2	SPBC2D10.12	SPBC2D10.12 rhp23 Rad23 homolog Rhp23	-0.0262463
577	2	9	SPAC16C9.06c	SPAC16C9.06c upf1 ATP-dependent RNA helicase Upf1	-0.0261093
2743	8	3	SPAC6G9.16c	SPAC6G9.16c sequence orphan	-0.0261056
1166	4	1	SPAC23G3.07c	SPAC23G3.07c snf30 SWI/SNF complex subunit Snf30	-0.0257696
943	3	8	SPBC1709.05	SPBC1709.05 sks2 heat shock protein Sks2	-0.0254969
1193	4	2	SPCC1322.02	SPCC1322.02 sequence orphan	-0.0254168
1316	4	7	SPACUNK4.17	SPACUNK4.17 NAD binding dehydrogenase family protein	-0.0254168
1447	4	13	SPAC3G6.09c	SPAC3G6.09c tps2 trehalose-phosphate synthase Tps2	-0.0248931
486	2	5	SPAC3A12.03c	SPAC3A12.03c mug145 ubiquitin-protein ligase E3	-0.0243638
2543	7	10	SPAC4D7.06c	SPAC4D7.06c siroheme synthase	-0.0242427
47	1	2	SPBC30D10.14	SPBC30D10.14 dienelactone hydrolase family	-0.0240794
2355	7	3	SPBC146.02	SPBC146.02 sequence orphan	-0.0239214
1643	5	5	SPBC14C8.03	SPBC14C8.03 fma2 methionine aminopeptidase Fma2	-0.0238095
2436	7	6	SPBC21D10.07	SPBC21D10.07 UPF0287 family protein	-0.0234518
19	1	1	SPAC1D4.11c	SPAC1D4.11c lkh1 dual specificity protein kinase Lkh1	-0.0234004
1366	4	9	SPBC1271.14	SPBC1271.14 glutamate N-acetyltransferase	-0.02326
1324	4	8	SPAC1F3.10c	SPAC1F3.10c 39722 mitochondrial intermediate peptidase Oct1	-0.0232315
1419	4	12	SPBC23G7.12c	SPBC23G7.12c rpt6 19S proteasome regulatory subunit Rpt6	-0.0229333
2981	8	13	SPCC18.01c	SPCC18.01c adg3 beta-glucosidase Adg3 (predicted)	-0.0223549
2405	7	5	SPBC1A4.04	SPBC1A4.04 sequence orphan	-0.0222915
1085	3	14	SPBC18H10.05	SPBC18H10.05 WD repeat protein	-0.022262
2550	7	11	SPBC17D11.03c	SPBC17D11.03c conserved fungal protein	-0.0221969
458	2	4	SPBC31F10.16	SPBC31F10.16 ChAPs family protein	-0.0218923
1220	4	3	SPAC8F11.08c	SPAC8F11.08c esterase/lipase	-0.0218317
950	3	8	SPBC16A3.06	SPBC16A3.06 tRNA specific adenosine deaminase	-0.0218138
2857	8	8	SPAC694.05c	SPAC694.05c rps2502 40S ribosomal protein S25	-0.0217847
3060	8	16	SPBC30B4.08	SPBC30B4.08 eri1 double-strand siRNA ribonuclease	-0.0217104
2744	8	3	SPAC1F7.06	SPAC1F7.06 ThiJ domain protein	-0.0217078
1391	4	10	SPCPB16A4.03c	SPCPB16A4.03c ade10 IMP cyclohydrolase	-0.0215275
2300	6	16	SPAC24H6.08	SPAC24H6.08 sequence orphan	-0.0210181
563	2	8	SPBC17F3.01c	SPBC17F3.01c rga5 GTPase activating protein Rga5	-0.0210169
1184	4	2	SPAC4D7.10c	SPAC4D7.10c SAGA complex subunit Spt20	-0.0209622
2311	7	1	SPBC2G5.01	SPBC2G5.01 DUF1682 family protein	-0.0209414
580	2	9	SPAC328.06	SPAC328.06 ubp2 ubiquitin C-terminal hydrolase Ubp2	-0.0209177
2800	8	5	SPBC428.07	SPBC428.07 meu6 meiotic chromosome segregation protein Meu6	-0.020804
1114	3	15	SPBC14F5.07	SPBC14F5.07 ER-localized ubiquitin ligase	-0.0206803
1392	4	10	SPAC17A2.13c	SPAC17A2.13c rad25 14-3-3 protein Rad25	-0.020473
2732	8	2	SPBC19C2.02	SPBC19C2.02 pmt1 DNA methyltransferase homolog	-0.0204312
1306	4	7	SPAC1F7.09c	SPAC1F7.09c allantoicase	-0.0204012
625	2	11	SPAC1705.02	SPAC1705.02 human 4F5S homolog	-0.0197166
140	1	6	SPAC12G12.01c	SPAC12G12.01c ubiquitin-protein ligase E3	-0.019428
1510	4	15	SPBC12C2.08	SPBC12C2.08 dnm1 dynamin Dnm1	-0.0193952
1138	3	16	SPAC9G1.06c	SPAC9G1.06c cyk3 cytokinesis protein Cyk3	-0.0193093
1003	3	10	SPAC1002.03c	SPAC1002.03c gls2 glucosidase II Gls2	-0.0189585
330	1	14	SPAC11H11.04	SPAC11H11.04 mam2 pheromone p-factor receptor	-0.0189516
2491	7	8	SPBC4F6.10	SPBC4F6.10 vps901 guanyl-nucleotide exchange factor Vps901	-0.0187204
2551	7	11	SPCC126.10	SPCC126.10 iah1 isoamyl acetate hydrolytic enzyme Iah1	-0.0179312
2527	7	10	SPAC1002.01	SPAC1002.01 conserved fungal protein	-0.0177378
445	2	3	SPAC1F8.01	SPAC1F8.01 ght3 hexose transporter Ght3	-0.0175439
2765	8	4	SPCC794.07	SPCC794.07 dihydrolipoamide S-acetyltransferase E2	-0.0174009
2837	8	7	SPBC651.06	SPBC651.06 mug166 sequence orphan	-0.0174009
2063	6	6	SPAC664.12c	SPAC664.12c LYR family protein	-0.0172876
1055	3	12	SPAC17H9.01	SPAC17H9.01 cid16 poly(A) polymerase Cid16	-0.0172785
2475	7	8	SPBC1683.06c	SPBC1683.06c uridine ribohydrolase	-0.0169073
2493	7	8	SPCC4B3.11c	SPCC4B3.11c conserved eukaryotic protein	-0.0169073
2504	7	9	SPAC664.04c	SPAC664.04c rps1602 40S ribosomal protein S16	-0.0169073
1522	4	16	SPAC343.15	SPAC343.15 tit1 tRNA isopentenyltransferase	-0.0168723
644	2	11	SPAC824.04	SPAC824.04 WD repeat protein	-0.0167245
666	2	12	SPBP8B7.23	SPBP8B7.23 ubiquitin-protein ligase E3	-0.0167245
642	2	11	SPAC7D4.02c	9 SPAC7D4.02c src (SH3) homology domain protein, unknown fa	-0.0167245
2542	7	10	SPAC823.16c	SPAC823.16c mug179 WD repeat protein Mug179	-0.0166977
1005	3	10	SPAC12B10.16c	SPAC12B10.16c mug157 conserved protein (fungal and bacteria	-0.0165583
1261	4	5	SPBC17G9.08c	SPBC17G9.08c csx2 Arf GAP protein	-0.0165075
2965	8	12	SPCC70.02c	SPCC70.02c mitochondrial ATPase inhibitor	-0.0163767
1295	4	6	SPCC74.02c	SPCC74.02c mRNA cleavage and polyadenylation specificity f	-0.0163691
2707	8	1	SPAC15F9.01c	SPAC15F9.01c sequence orphan	-0.0163525
2100	6	8	SPCC330.12c	SPCC330.12c sdh3 succinate dehydrogenase (ubiquinone)	-0.0163183
1143	3	16	SPCC1620.08	SPCC1620.08 succinate-CoA ligase	-0.0162969
102	1	5	SPACUNK4.19	SPACUNK4.19 mug153 sequence orphan	-0.0161389
2086	6	7	SPBC2A9.07c	SPBC2A9.07c zf-PARP-type zinc finger protein	-0.0153089
2131	6	9	SPCC330.03c	SPCC330.03c NADPH-hemoprotein reductase	-0.0153089
2133	6	9	SPCC777.08c	SPCC777.08c bit61 HbrB family protein	-0.0153089
2318	7	1	SPAC24C9.16c	SPAC24C9.16c cox8 cytochrome c oxidase subunit VIII	-0.0152152
1570	5	2	SPAC31A2.11c	SPAC31A2.11c cuf1 Cu metalloregulatory transcription factor	-0.0151012
1335	4	8	SPCC1223.02	SPCC1223.02 nmt1 no message in thiamine Nmt1	-0.0149262
1581	5	2	SPBC800.05c	SPBC800.05c tub1 tubulin alpha 2	-0.0148369
875	3	5	SPAC23A1.06c	SPAC23A1.06c cmk2 MAPK-activated protein kinase Cmk2	-0.014715
960	3	8	SPCC970.02	2 SPCC970.02 mannan endo-1,6-alpha-mannosidase"	-0.0146958
282	1	12	SPAC11G7.02	SPAC11G7.02 pub1 ubiquitin-protein ligase E3	-0.0143273
2295	6	16	SPAC11D3.03c	SPAC11D3.03c meiotic chromosome segregation protein	-0.0142496
623	2	10	SPBC30D10.18c	SPBC30D10.18c rpl102 60S ribosomal protein L10a	-0.0141881
1175	4	1	SPCC1183.11	SPCC1183.11 MS ion channel protein 1	-0.0141426
2718	8	2	SPAC4H3.01	SPAC4H3.01 DNAJ domain protein Caj1/Djp1 type	-0.0140947
420	2	2	SPBC660.10	SPBC660.10 translation elongation factor G	-0.0137395
2050	6	6	SPCC1235.08c	SPCC1235.08c pdh1 DUF1751 family protein	-0.0136687
1929	6	1	SPBC1773.17c	SPBC1773.17c hydroxyacid dehydrogenase	-0.0131063
2901	8	9	SPCPB16A4.06c	SPCPB16A4.06c sequence orphan	-0.0131032
540	2	7	SPAC4G9.02	SPAC4G9.02 ribonuclease H2 complex subunit	-0.0130273
289	1	13	SPAC1751.04	SPAC1751.04 sequence orphan	-0.0128679
1764	5	10	SPAC26A3.01	SPAC26A3.01 sxa1 aspartic protease Sxa1	-0.0127227
891	3	6	SPAC1687.19c	SPAC1687.19c queuine tRNA-ribosyltransferase	-0.0127097
2591	7	12	SPAC4F10.19c	SPAC4F10.19c zf-HIT protein Hit1	-0.0124417
1122	3	15	SPAC16C9.05	SPAC16C9.05 cph1 PHD finger containing protein	-0.0122308
2341	7	2	SPAC186.06	SPAC186.06 human MAWBP homolog	-0.0119827
366	1	16	empty	empty	-0.0119048
1976	6	3	SPCC11E10.03	SPCC11E10.03 mug1 dynactin complex subunit	-0.0118897
2329	7	2	SPAC22E12.03c	SPAC22E12.03c THIJ/PFPI family peptidase	-0.0118808
257	1	11	SPAC18B11.09c	SPAC18B11.09c N-acetyltransferase	-0.0118626
2868	8	8	SPAC22E12.01	SPAC22E12.01 triose phosphate transporter	-0.0116355
1531	4	16	SPCC188.09c	SPCC188.09c glycoprotein	-0.0116194
2388	7	4	SPBC21C3.17c	SPBC21C3.17c conserved fungal protein	-0.0109841
1708	5	8	SPCC663.06c	SPCC663.06c short chain dehydrogenase	-0.0108347
535	2	7	SPAC1834.03c	SPAC1834.03c hhf1 histone H4 h4.1	-0.0107962
1634	5	5	SPAC922.06	SPAC922.06 short chain dehydrogenase	-0.0107607
2961	8	12	SPBC19C7.10	SPBC19C7.10 transcription factor	-0.0107088
718	2	14	SPCC1235.05c	SPCC1235.05c fft2 fun thirty related protein Fft2	-0.0106499
3059	8	16	SPBC1198.08	SPBC1198.08 dipeptidase Dug1	-0.0103589
1565	5	2	SPAC24B11.13	SPAC24B11.13 hem3 hydroxymethylbilane synthase	-0.0103565
1023	3	11	SPBC21D10.11c	SPBC21D10.11c nfs1 iron-sulfur cluster assembly protein Nfs	-0.0103519
2477	7	8	SPCC1020.09	3 SPCC1020.09 WD repeat protein, human WDR79 family"	-0.0102834
2769	8	4	SPBC685.02	SPBC685.02 conserved eukaryotic protein	-0.00939239
1000	3	10	SPBC2D10.04	SPBC2D10.04 arrestin Aly1 related	-0.00915863
1813	5	12	SPBC15D4.09c	SPBC15D4.09c cystathionine gamma-synthase	-0.00913581
1019	3	11	SPCC777.07	6 SPCC777.07 alpha-1,2-mannosyltransferase"	-0.00893878
262	1	11	SPBC839.14c	SPBC839.14c methyltransferase	-0.00892886
61	1	3	SPCC757.12	SPCC757.12 alpha-amylase homolog	-0.0088282
1157	4	1	SPBC1683.09c	SPBC1683.09c frp1 ferric-chelate reductase Frp1	-0.00882044
234	1	10	SPAC11E3.09	SPAC11E3.09 pyp3 protein-tyrosine phosphatase Pyp3	-0.00870577
578	2	9	SPAC2F7.09c	SPAC2F7.09c sequence orphan	-0.0085845
2459	7	7	SPCC364.02c	SPCC364.02c bis1 stress response protein Bis1	-0.00782677
2552	7	11	SPAC31A2.12	SPAC31A2.12 arrestin/PY protein 1	-0.00733606
897	3	6	SPAC12B10.03	5 SPAC12B10.03 WD repeat protein, human WDR20 family"	-0.00732971
930	3	7	SPBC1773.16c	SPBC1773.16c transcription factor	-0.00732971
1869	5	14	SPBP23A10.16	SPBP23A10.16 sdh4 TIM22 inner membrane protein import compl	-0.00729837
1940	6	1	SPBC16G5.13	SPBC16G5.13 sequence orphan	-0.00717019
320	1	14	SPCC663.03	SPCC663.03 pmd1 leptomycin efflux transporter Pmd1	-0.00715009
3034	8	15	SPAC1687.14c	5 SPAC1687.14c EF hand family protein, unknown role"	-0.00708088
2522	7	10	SPBC1773.02c	SPBC1773.02c thioredoxin peroxidase	-0.00706458
2478	7	8	SPAPB1A11.03	SPAPB1A11.03 FMN dependent dehydrogenase	-0.0069763
742	2	15	SPAC9.10	SPAC9.10 thi9 amino acid permease, unknown 2"	-0.00601816
1639	5	5	SPAC3G6.06c	SPAC3G6.06c rad2 FEN-1 endonuclease	-0.00568628
2135	6	9	SPBC28E12.04	SPBC28E12.04 sequence orphan	-0.00551957
2766	8	4	SPAC5D6.10c	SPAC5D6.10c mug116 sequence orphan	-0.00531632
1142	3	16	SPBC215.13	SPBC215.13 sequence orphan	-0.00512763
20	1	1	SPBC2G2.05	SPBC2G2.05 rpl1603 60S ribosomal protein L13/L16	-0.00507735
82	1	4	SPCC777.17c	SPCC777.17c mitochondrial ribosomal protein subunit L9	-0.00507735
2344	7	2	SPAC27D7.04	SPAC27D7.04 omt2 4-alpha-hydroxytetrahydrobiopterin dehydra	-0.00466943
1075	3	13	SPBC3B8.06	SPBC3B8.06 conserved fungal protein	-0.0044335
2565	7	11	SPAC630.06c	SPAC630.06c conserved fungal protein	-0.00432738
474	2	4	SPBP35G2.06c	SPBP35G2.06c nup131 nucleoporin Nup131	-0.00411285
2682	7	16	SPCC24B10.16c	SPCC24B10.16c sequence orphan	-0.00374341
1778	5	11	SPAPB1A10.12c	1 SPAPB1A10.12c alo1 D-arabinono-1,4-lactone oxidase"	-0.0037415
912	3	6	SPCC737.03c	SPCC737.03c conserved eukaryotic protein	-0.00369168
755	2	16	SPBC1861.05	SPBC1861.05 carbohydrate kinase	-0.00363868
2237	6	14	SPCC825.05c	SPCC825.05c splicing coactivator SRRM1	-0.00359527
1982	6	3	SPAC22H12.05c	SPAC22H12.05c fasciclin domain protein	-0.00328048
331	1	14	SPBC216.05	SPBC216.05 rad3 ATR checkpoint kinase	-0.00302025
370	1	16	SPBC18H10.04c	SPBC18H10.04c sce3 translation initiation factor eIF4B	-0.00292619
2359	7	3	SPBC2G5.03	SPBC2G5.03 ctu1 ATP binding protein	-0.00285784
326	1	14	SPAC1039.05c	SPAC1039.05c klf1 conserved fungal protein	-0.00282523
1225	4	4	SPBC1711.05	SPBC1711.05 nucleocytoplasmic transport chaperone Srp40	-0.00250879
2697	8	1	SPAC1952.08c	SPAC1952.08c pyridoxamine 5'-phosphate oxidase	-0.00232197
2700	8	1	SPAC19B12.12c	SPAC19B12.12c yip11 SMN family protein Yip11	-0.00188241
776	3	1	SPBC13G1.10c	SPBC13G1.10c mug81 ATP-dependent RNA helicase Slh1	-0.00172711
487	2	5	SPAC1805.12c	SPAC1805.12c uep1 ribosomal-ubiquitin fusion protein Ubi2	-0.00168691
566	2	8	SPBC839.07	SPBC839.07 ibp1 itty bitty phosphatase Ibp1	-0.00168691
2366	7	3	SPAC3H1.14	7 SPAC3H1.14 cytoplasmic vesicle protein, Vid24 family"	-0.00160286
2660	7	15	SPBC17G9.09	SPBC17G9.09 tif213 translation initiation factor eIF2 gamma	-0.0015121
1016	3	11	SPBC14F5.10c	SPBC14F5.10c ubiquitin-protein ligase E3	-0.00144058
910	3	6	SPCC191.11	SPCC191.11 inv1 beta-fructofuranosidase	-0.00111966
203	1	9	SPBC651.12c	SPBC651.12c sequence orphan	-0.00110693
2592	7	12	SPBC887.18c	SPBC887.18c transcription adaptor protein	-0.0010674
671	2	12	SPBC31F10.07	SPBC31F10.07 cortical component Lsb5	-0.00106034
212	1	9	SPBC32H8.05	SPBC32H8.05 conserved fungal protein	-0.00105072
367	1	16	SPAC14C4.11	SPAC14C4.11 polyphosphate synthetase	-0.000821018
57	1	3	SPBC106.05c	SPBC106.05c tim11 F0-ATPase subunit E	-0.000815553
1024	3	11	SPBC1105.10	SPBC1105.10 rav1 RAVE complex subunit Rav1	-0.000668543
2838	8	7	SPAC15A10.08	SPAC15A10.08 ain1 alpha-actinin	-0.000386186
2886	8	9	SPAC1687.10	SPAC1687.10 mcp1 sequence orphan	-0.000386186
432	2	2	SPCC126.06	SPCC126.06 twf1 twinfilin	-0.000356125
2920	8	10	SPCC1919.09	SPCC1919.09 tif6 translation initiation factor eIF6	0.00017316
1014	3	11	SPAC2F3.15	SPAC2F3.15 lsk1 latrunculin sensitive kinase Lsk1	0.000181406
410	2	2	SPBC31F10.12	SPBC31F10.12 RNA-binding protein Tma20	0.00050642
1180	4	2	SPCC188.07	SPCC188.07 ccq1 telomere maintenence protein	0.000548625
2132	6	9	SPBC18E5.08	SPBC18E5.08 N-acetyltransferase	0.000571981
400	2	1	SPAC631.01c	SPAC631.01c acp2 F-actin capping protein beta subunit	0.000658639
33	1	2	SPAC17C9.11c	SPAC17C9.11c zinc finger protein	0.00103454
1206	4	3	SPAC10F6.13c	SPAC10F6.13c aspartate aminotransferase	0.00131119
2027	6	5	SPBC2G5.02c	SPBC2G5.02c CK2 family regulatory subunit	0.00141208
2323	7	1	SPAC17G8.08c	SPAC17G8.08c human TMEM165 homolog	0.00142583
2675	7	16	SPAC14C4.04	SPAC14C4.04 B22918-2 hypothetical protein	0.00161125
30	1	2	SPCC1450.07c	SPCC1450.07c D-amino acid oxidase	0.0016779
695	2	13	SPAC27D7.14c	SPAC27D7.14c tpr1 RNA polymerase II associated Paf1 complex	0.00192187
1514	4	16	SPBC18E5.01	SPBC18E5.01 cycloisomerase 2 family	0.00220762
506	2	6	SPBC32C12.03c	SPBC32C12.03c ppk25 serine/threonine protein kinase Ppk25	0.00230544
974	3	9	SPAC30.04c	SPAC30.04c abc4 glutathione S-conjugate-exporting ATPase Ab	0.00244898
1461	4	13	SPBC365.12c	SPBC365.12c ish1 LEA domain protein	0.00252652
821	3	3	SPCC4B3.15	SPCC4B3.15 mid1 medial ring protein Mid1	0.00256259
2465	7	7	SPAC13D6.01	SPAC13D6.01 pof14 F-box protein Pof14	0.00264379
1155	4	1	SPBC1711.13	SPBC1711.13 his2 histidinol dehydrogenase His2	0.00294211
893	3	6	SPBC25D12.06	SPBC25D12.06 RNA helicase	0.00324558
1601	5	3	SPBC660.07	9 SPBC660.07 ntp1 alpha,alpha-trehalase Ntp1"	0.00373754
2156	6	10	SPAC1805.03c	SPAC1805.03c trm13 tRNA 2'-O-methyltransferase Trm13	0.00401492
2853	8	7	SPCC569.04	SPCC569.04 sequence orphan	0.00411119
2993	8	13	SPCC1020.13c	SPCC1020.13c phospholipase	0.00411119
226	1	10	SPCC965.10	SPCC965.10 transcription factor	0.0041615
2933	8	11	SPCC16A11.07	SPCC16A11.07 coq10 ubiquinone binding protein Coq10	0.00434726
2568	7	11	SPAC186.03	SPAC186.03 L-asparaginase	0.00458629
2616	7	13	SPAC1F12.04c	SPAC1F12.04c conserved fungal protein	0.00465852
2256	6	14	SPAC6G9.03c	SPAC6G9.03c mug183 histone chaperone Rtt106-like	0.00466174
1952	6	2	SPBC405.06	SPBC405.06 DNAJ protein Xdj1	0.00512881
751	2	16	SPBC16E9.14c	SPBC16E9.14c zrg17 membrane transporter	0.00513807
632	2	11	SPAC3G6.11	SPAC3G6.11 ATP dependent DNA helicase Chl1	0.00530172
2863	8	8	SPBC725.04	SPBC725.04 oxalyl-CoA decarboxylase	0.00538781
1622	5	4	SPAC1071.11	SPAC1071.11 NADH-dependent flavin oxidoreductase	0.00581395
3015	8	14	SPBC16E9.09c	SPBC16E9.09c COPII vesicle coat component Erp5/Erp6	0.00584555
1921	6	1	SPAC23D3.11	SPAC23D3.11 ayr1 1-acyldihydroxyacetone phosphate reductase	0.00585678
647	2	11	SPAC27D7.02c	SPAC27D7.02c conserved eukaryotic protein	0.00595009
2771	8	4	SPAC25B8.07c	SPAC25B8.07c hypoxia induced family protein	0.00595578
619	2	10	SPBC27.04	SPBC27.04 sequence orphan	0.00607287
780	3	1	SPBC1D7.01	SPBC1D7.01 prefoldin subunit 1	0.00640691
1703	5	7	SPAC9E9.10c	SPAC9E9.10c cbh1 centromere binding protein (k-type repeat)	0.00649351
2847	8	7	SPBC4B4.03	SPBC4B4.03 rsc1 RSC complex subunit Rsc1	0.00652376
1365	4	9	SPBC16G5.17	SPBC16G5.17 transcription factor	0.00691478
2219	6	13	SPBC365.16	SPBC365.16 sequence orphan	0.00714331
850	3	4	SPAC6F6.13c	SPAC6F6.13c DUF726 family protein	0.00718274
637	2	11	SPAC20H4.10	SPAC20H4.10 ufd2 ubiquitin-protein ligase E4	0.00755093
2789	8	5	SPBC23G7.14	SPBC23G7.14 sequence orphan	0.00773131
2540	7	10	SPAC26F1.05	SPAC26F1.05 mug106 sequence orphan	0.00823719
2143	6	10	SPAC56F8.16	SPAC56F8.16 esc1 transcription factor Esc1	0.00835049
494	2	5	SPAC57A10.03	SPAC57A10.03 cyp1 cyclophilin family peptidyl-prolyl cis-tr	0.00843455
2242	6	14	SPCC162.05	SPCC162.05 coq3 hexaprenyldihydroxybenzoate methyltransfera	0.00847458
1317	4	7	SPBC16A3.02c	SPBC16A3.02c mitochondrial peptidase	0.00848146
1439	4	12	SPCPB1C11.02	2 SPCPB1C11.02 amino acid permease, unknown 16"	0.00850496
354	1	15	SPBC2D10.20	SPBC2D10.20 ubc1 ubiquitin conjugating enzyme Ubc1	0.00879695
2204	6	12	SPAC1B3.02c	0 SPAC1B3.02c transcription elongation factor, Elf1 family"	0.00881356
2305	7	1	SPAC7D4.05	SPAC7D4.05 hydrolase	0.00882024
2714	8	2	SPCC1259.10	SPCC1259.10 pgp1 metallopeptidase Pgp1	0.00889716
2451	7	7	SPBC1685.04	SPBC1685.04 sequence orphan	0.00909377
603	2	10	SPBC1215.01	SPBC1215.01 shy1 SURF-family protein Shy1	0.00910931
319	1	14	SPAC13F5.05	SPAC13F5.05 thioredoxin family protein	0.00913923
1334	4	8	SPBC16C6.08c	SPBC16C6.08c qcr6 ubiquinol-cytochrome-c reductase complex	0.00947129
1338	4	8	SPCC777.03c	SPCC777.03c nifs homolog	0.00947129
88	1	4	SPAC1071.08	SPAC1071.08 rpp203 60S acidic ribosomal protein P2C subunit	0.00976857
3018	8	14	SPAC17A2.01	9 SPAC17A2.01 bsu1 high-affinity import carrier for pyridoxi	0.00982238
1716	5	8	SPBC16D10.07c	SPBC16D10.07c sir2 Sir2 family histone deacetylase Sir2	0.0103066
2576	7	12	SPAC1687.16c	SPAC1687.16c erg3 C-5 sterol desaturase Erg3	0.0103822
630	2	11	SPAC3A12.12	SPAC3A12.12 atp11 F1-ATPase chaperone Atp11	0.0104287
1626	5	4	SPCC16A11.16c	SPCC16A11.16c ARM1 family	0.0105708
2952	8	11	SPCC962.05	SPCC962.05 sequence orphan	0.0107233
834	3	3	SPAC2C4.14c	SPAC2C4.14c ppk11 PAK-related kinase Ppk11	0.0108374
1081	3	14	SPAC4F8.10c	SPAC4F8.10c stg1 SM22/transgelin-like actin modulating prot	0.0108374
338	1	15	SPAC694.03	SPAC694.03 conserved fungal protein	0.0109416
392	2	1	SPAC3C7.12	SPAC3C7.12 tip1 CLIP170 family protein Tip1	0.0112127
794	3	2	SPAC18G6.02c	SPAC18G6.02c chp1 chromodomain protein Chp1	0.0112232
1736	5	9	SPBC4F6.11c	SPBC4F6.11c asparagine synthase	0.0113182
1623	5	4	SPBC1773.04	SPBC1773.04 flavonol reductase/cinnamoyl-CoA reductase fam	0.0113636
508	2	6	SPBC337.03	SPBC337.03 conserved eukaryotic protein	0.011471
1673	5	6	SPBC25B2.07c	SPBC25B2.07c mug164 microtubule-associated protein	0.0116279
2360	7	3	SPBC1289.06c	SPBC1289.06c sequence orphan	0.0117086
586	2	9	SPAC3H5.07	SPAC3H5.07 rpl702 60S ribosomal protein L7	0.0118084
2006	6	4	SPBP35G2.03c	SPBP35G2.03c sgo1 shugoshin Sgo1	0.0120284
2194	6	12	SPCC162.04c	SPCC162.04c wtf13 wtf element Wtf13	0.0122362
2419	7	5	SPAC19G12.04	SPAC19G12.04 ureidoglycolate hydrolase	0.0123143
936	3	7	SPAC9G1.10c	SPAC9G1.10c inositol polyphosphate phosphatase	0.0124633
720	2	14	SPCC1442.14c	SPCC1442.14c adenosine 5'-monophosphoramidase	0.0125836
277	1	12	SPAC4A8.06c	SPAC4A8.06c esterase/lipase	0.0127187
2803	8	5	SPAC25H1.09	SPAC25H1.09 mde5 alpha-amylase homolog Mde5	0.0129068
2900	8	9	SPAC26H5.03	SPAC26H5.03 WD repeat protein Cac2	0.0129068
2442	7	6	SPBC2G2.08	SPBC2G2.08 ade9 C-1-tetrahydrofolatesynthase/methylenetetra	0.0129645
1202	4	3	SPCC4B3.12	SPCC4B3.12 set9 histone lysine methyltransferase Set9	0.0135275
1910	5	16	SPAC26H5.10c	SPAC26H5.10c tif51 translation initiation factor eIF5A	0.0136039
2567	7	11	SPBC12C2.09c	SPBC12C2.09c Haemolysin-III family protein	0.0138646
1176	4	1	SPBC13G1.08c	SPBC13G1.08c ash2 Ash2-trithorax family protein	0.0141073
573	2	8	SPBC29A3.09c	SPBC29A3.09c AAA family ATPase Gcn20	0.01417
617	2	10	SPBC21C3.09c	SPBC21C3.09c fumarylacetoacetate (FAA) hydrolase	0.01417
1380	4	10	SPAC24B11.07c	SPAC24B11.07c ketopantoate reductase	0.0142363
1788	5	11	SPBC649.03	SPBC649.03 rhp14 XP-A family homolog Rhp14	0.0144216
2004	6	4	SPCC1919.13c	SPCC1919.13c conserved eukaryotic protein	0.0144888
224	1	10	SPCC550.15c	SPCC550.15c ribosome biogenesis protein	0.0146663
1181	4	2	SPBC24C6.06	SPBC24C6.06 gpa1 G-protein alpha subunit	0.0146752
2751	8	3	SPBC2G2.10c	SPBC2G2.10c mug110 sequence orphan	0.0147514
713	2	14	SPBC23E6.08	SPBC23E6.08 sat1 Golgi membrane exchange factor subunit Sat	0.0148693
437	2	3	SPAC17G6.05c	SPAC17G6.05c Rhophilin-2 homolog	0.0150124
2929	8	11	SPAC8E11.06	SPAC8E11.06 sequence orphan	0.015078
2362	7	3	SPCC1739.04c	SPCC1739.04c sequence orphan	0.0151115
2457	7	7	SPCC338.14	SPCC338.14 adenosine kinase	0.0151115
534	2	7	SPAC3A12.06c	SPAC3A12.06c sodium/calcium exchanger	0.0152003
1978	6	3	SPAC15E1.10	SPAC15E1.10 PI31 proteasome regulator related	0.0153089
505	2	6	SPAPB1A11.04c	SPAPB1A11.04c transcription factor	0.015857
528	2	6	SPCC132.02	SPCC132.02 hst2 Sir2 family histone deacetylase Hst2	0.015857
562	2	8	SPBC582.09	SPBC582.09 pex11 peroxisomal biogenesis factor 11	0.015857
567	2	8	SPBC215.01	SPBC215.01 GTPase activating protein	0.015857
2822	8	6	SPAC1687.22c	SPAC1687.22c puf3 RNA-binding protein Puf3	0.0160281
2845	8	7	SPBC106.08c	SPBC106.08c mug2 DUF1773 family protein 1	0.0160281
2158	6	10	SPAC2G11.04	SPAC2G11.04 RNA-binding protein	0.0162136
1205	4	3	SPBC1773.14	SPBC1773.14 arg7 argininosuccinate lyase	0.0164143
2188	6	12	SPBC1711.11	SPBC1711.11 autophagy associated protein	0.0164707
1213	4	3	SPAC19D5.07	SPAC19D5.07 uga1 4-aminobutyrate aminotransferase (GABA tra	0.0165213
889	3	6	SPAC1F8.04c	SPAC1F8.04c hydrolase	0.0165488
1068	3	13	SPAC29E6.01	SPAC29E6.01 pof11 F-box protein Pof11	0.0167347
1139	3	16	SPAC323.03c	SPAC323.03c sequence orphan	0.0168165
2423	7	5	SPAPB1A10.10c	SPAPB1A10.10c ypt71 GTPase Ypt71	0.0168807
2080	6	7	SPAC4F8.15	SPAC4F8.15 itr1 myo-inositol transporter Itr1	0.0169492
732	2	15	SPAC56E4.06c	SPAC56E4.06c ggt2 gamma-glutamyltranspeptidase Ggt2	0.0173262
2728	8	2	SPCC794.02	SPCC794.02 wtf5 wtf element Wtf5	0.0174156
939	3	8	SPAC9G1.02	SPAC9G1.02 wis4 MAP kinase kinase kinase Wis4	0.0174173
651	2	12	SPBC1271.05c	SPBC1271.05c zinc finger protein zf-AN1 type	0.0174595
2264	6	15	SPAC1142.06	SPAC1142.06 get3 GET complex ATPase subunit	0.0176058
251	1	11	SPBC713.09	SPBC713.09 sequence orphan	0.0176307
3068	8	16	SPAC4G9.15	SPAC4G9.15 ketoreductase	0.0177089
2083	6	7	SPCC306.07c	SPCC306.07c U3 snoRNP-associated protein Cic1/Utp30 family	0.0177693
1036	3	12	SPAC24C9.07c	SPAC24C9.07c bgs2 1,3-beta-glucan synthase subunit Bgs2"	0.0179648
901	3	6	SPAC637.09	SPAC637.09 ribonuclease H70	0.0179923
2048	6	6	SPBC646.06c	4 SPBC646.06c agn2 glucan endo-1,3-alpha-glucosidase Agn2"	0.0180085
2199	6	12	SPAC1002.18	SPAC1002.18 urg3 DUF1688 family protein	0.0180085
1974	6	3	SPAC31G5.04	SPAC31G5.04 homoisocitrate dehydrogenase	0.0185894
2170	6	11	SPAC17G6.17	SPAC17G6.17 pof8 F-box protein Pof8	0.0185894
2526	7	10	SPBC2F12.04	SPBC2F12.04 rpl1701 60S ribosomal protein L17	0.0187009
199	1	9	SPAC824.07	SPAC824.07 hydroxyacylglutathione hydrolase	0.0187322
417	2	2	SPBC16G5.05c	SPBC16G5.05c MSP domain	0.0188586
2317	7	1	SPAC21E11.04	SPAC21E11.04 ppr1 L-azetidine-2-carboxylic acid acetyltrans	0.0190534
275	1	12	SPAC27D7.06	SPAC27D7.06 electron transfer flavoprotein alpha subunit	0.0192174
471	2	4	SPBC19G7.10c	SPBC19G7.10c topoisomerase associated protein	0.0192308
589	2	9	SPAC20H4.05c	SPAC20H4.05c adducin	0.0192308
552	2	7	SPACUNK12.02c	SPACUNK12.02c cmk1 calcium/calmodulin-dependent protein kin	0.019412
741	2	15	SPAC25H1.02	SPAC25H1.02 jmj1 Jmj1 protein	0.0195838
81	1	4	SPAC1805.11c	SPAC1805.11c rps2602 40S ribosomal protein S26	0.0196014
662	2	12	SPBC8D2.01	SPBC8D2.01 gsk31 serine/threonine protein kinase Gsk31	0.0197368
2476	7	8	SPCC1235.02	SPCC1235.02 bio2 biotin synthase	0.0198782
944	3	8	SPAC3H1.12c	SPAC3H1.12c snt2 Lid2 complex subunit Snt2	0.0199399
2244	6	14	SPCC663.12	SPCC663.12 cid12 poly(A) polymerase Cid12	0.0199563
434	2	3	SPAC27F1.06c	SPAC27F1.06c FKBP-type peptidyl-prolyl cis-trans isomerase	0.020093
3055	8	16	SPBC14C8.15	SPBC14C8.15 triglyceride lipase-cholesterol esterase	0.0205768
716	2	14	SPCC1020.12c	SPCC1020.12c xap-5-like protein	0.0205921
264	1	11	SPBP4H10.12	SPBP4H10.12 conserved protein (fungal and bacterial)	0.0209289
1652	5	5	SPBC947.06c	SPBC947.06c spermidine family transporter	0.0211039
380	1	16	SPAC13C5.07	SPAC13C5.07 rad32 Rad32 nuclease	0.021152
1575	5	2	SPBC16E9.02c	SPBC16E9.02c CUE domain protein Cue5	0.0212927
2113	6	9	SPAC25G10.02	SPAC25G10.02 cce1 mitochondrial cruciform cutting endonucle	0.0214238
2778	8	4	SPAC22E12.04	SPAC22E12.04 ccs1 metallochaperone Ccs1	0.0217025
2913	8	10	SPBC17D1.02	SPBC17D1.02 diphthamide biosynthesis protein	0.0218528
3022	8	14	SPAC343.19	SPAC343.19 phosphatidylinositol 4-kinase Lsb6	0.0218677
1675	5	6	SPBC354.07c	SPBC354.07c oxysterol binding protein	0.0223497
1718	5	8	SPAC24B11.06c	SPAC24B11.06c sty1 MAP kinase Sty1	0.0223497
1678	5	6	SPAC15E1.02c	SPAC15E1.02c DUF1761 family protein	0.022614
1571	5	2	SPAC890.05	SPAC890.05 ribosome biogenesis protein	0.0227304
991	3	10	SPBC56F2.03	SPBC56F2.03 actin-like protein Arp10	0.0227741
999	3	10	SPBC646.17c	SPBC646.17c dic1 dynein intermediate chain Dic1	0.0227741
2265	6	15	SPBC23E6.10c	SPBC23E6.10c methylthioribose-1-phosphate isomerase	0.0230368
309	1	13	SPAC2C4.08	SPAC2C4.08 conserved fungal protein	0.0231226
1547	5	1	SPBC11B10.05c	SPBC11B10.05c rsp1 random septum position protein Rsp1	0.0231572
2112	6	8	SPAC607.07c	SPAC607.07c sequence orphan	0.0232963
1672	5	6	SPAC31A2.15c	SPAC31A2.15c dcc1 DNA replication factor C complex subunit	0.0234068
352	1	15	SPBC23E6.05	SPBC23E6.05 arx1 ribosomal export complex Arx1	0.0234729
1594	5	3	SPCC18B5.10c	SPCC18B5.10c TREX complex subunit Tex1	0.0236711
465	2	4	SPBC16G5.16	SPBC16G5.16 transcription factor	0.0239845
237	1	10	SPBC29A10.10c	SPBC29A10.10c tRNA-splicing endonuclease positive effector	0.0240443
411	2	2	SPBC115.02c	SPBC115.02c AFG1 family mitochondrial ATPase	0.0240853
1603	5	3	SPCC1672.06c	SPCC1672.06c asp1 inositol hexakisphosphate kinase	0.0242248
1607	5	3	SPCC965.05c	SPCC965.05c thp1 uracil DNA N-glycosylase Thp1	0.0245017
438	2	3	SPAC3A11.09	SPAC3A11.09 sod22 plasma membrane alkali metal cation/H+ an	0.0246891
2507	7	9	SPCC338.18	SPCC338.18 sequence orphan	0.0248019
3066	8	16	SPAPB1A10.15	SPAPB1A10.15 Arv1-like family protein	0.0248186
1298	4	7	SPCC4G3.19	SPCC4G3.19 alp16 gamma tubulin complex ubunit Alp16	0.0249567
1137	3	16	SPAC1399.01c	SPAC1399.01c purine permease	0.0249963
1740	5	9	SPBC56F2.06	SPBC56F2.06 mug147 sequence orphan	0.0255411
3037	8	15	SPAC9E9.11	SPAC9E9.11 plr1 pyridoxal reductase	0.0256512
979	3	9	SPCC1906.02c	SPCC1906.02c CUE domain protein Cue3	0.0257354
1440	4	12	SPAC17A5.04c	SPAC17A5.04c mde10 spore wall assembly peptidase Mde10	0.0260417
1182	4	2	SPAC13A11.06	SPAC13A11.06 pyruvate decarboxylase	0.0263002
817	3	3	SPCC1450.11c	SPCC1450.11c cek1 serine/threonine protein kinase Cek1	0.0263146
2594	7	13	SPBP4H10.05c	SPBP4H10.05c spe2 S-adenosylmethionine decarboxylase proenz	0.0264209
1530	4	16	SPAC644.07	SPAC644.07 Rieske ISP assembly protein	0.0268323
740	2	15	SPAC869.05c	SPAC869.05c sulfate transporter	0.0269767
2427	7	6	SPBC1604.16c	SPBC1604.16c RNA-binding protein	0.0271694
2561	7	11	SPAC14C4.10c	SPAC14C4.10c Nudix family hydrolase	0.0271694
200	1	9	SPAPB17E12.12c	SPAPB17E12.12c mitochondrial transporter	0.0273996
122	1	6	SPBC56F2.08c	SPBC56F2.08c RNA-binding protein	0.0274649
2533	7	10	SPAC869.09	SPAC869.09 conserved fungal protein	0.0275678
2368	7	3	SPBC21C3.20c	SPBC21C3.20c git1 C2 domain protein Git1	0.0275791
655	2	12	SPBC1685.01	SPBC1685.01 pmp1 dual-specificity MAP kinase phosphatase Pm	0.027581
2529	7	10	SPBC1921.01c	SPBC1921.01c rpl3701 60S ribosomal protein L37	0.0276518
278	1	12	SPAC1006.06	SPAC1006.06 rgf2 RhoGEF Rgf2	0.0279269
2895	8	9	SPBC776.11	SPBC776.11 rpl2801 60S ribosomal protein Ll28B 27a	0.0279449
848	3	4	SPAC3C7.08c	SPAC3C7.08c elf1 AAA family ATPase ELf1	0.0280848
2002	6	4	SPBPB2B2.09c	SPBPB2B2.09c 2-dehydropantoate 2-reductase	0.0281575
1459	4	13	SPAP8A3.12c	SPAP8A3.12c tripeptidylpeptidase	0.0285123
394	2	1	SPAC3H1.05	SPAC3H1.05 CAAX prenyl protease	0.0285457
456	2	3	SPAC977.15	SPAC977.15 dienelactone hydrolase family	0.0287379
75	1	4	SPCC1223.15c	SPCC1223.15c spc19 DASH complex subunit Spc19	0.0289158
1513	4	16	SPBC1921.03c	SPBC1921.03c mex67 mRNA export receptor Mex67	0.0289941
1984	6	3	SPAC323.01c	SPAC323.01c mitochondrial NADH kinase	0.029251
2473	7	8	SPAC513.04	SPAC513.04 sequence orphan	0.0296966
2450	7	7	SPBC24C6.08c	SPBC24C6.08c vesicle coat protein	0.0297379
1269	4	5	SPBC15C4.04c	1 SPBC15C4.04c amino acid permease, unknown 10"	0.0298853
659	2	12	SPBC17G9.12c	SPBC17G9.12c conserved fungal protein	0.0303793
2696	8	1	SPAC1F3.09	SPAC1F3.09 mug161 CwfJ family protein	0.0305685
259	1	11	SPAC23A1.11	SPAC23A1.11 rpl1602 60S ribosomal protein L13/L16	0.0307245
2291	6	16	SPAC144.01	SPAC144.01 sequence orphan	0.0308166
2947	8	11	SPAC8F11.09c	SPAC8F11.09c nnt1 nicotinamide N-methyltransferase Nnt1	0.0308552
52	1	3	SPAC6B12.06c	SPAC6B12.06c conserved fungal protein	0.0309941
2737	8	3	SPCP31B10.02	SPCP31B10.02 conserved eukaryotic protein	0.0310212
2903	8	9	SPAPB1A10.09	SPAPB1A10.09 ase1 microtubule-associated protein Ase1	0.0310559
3056	8	16	SPCC576.14	SPCC576.14 diphthine synthase	0.0310559
322	1	14	SPAC57A7.13	SPAC57A7.13 RNA-binding protein	0.0312452
1777	5	11	SPAC1F5.10	1 SPAC1F5.10 ATP-dependent RNA helicase, eIF4A related"	0.031262
2067	6	7	SPAC4G8.11c	SPAC4G8.11c atp10 F1-F0 ATPase assembly protein	0.0315898
2772	8	4	SPAC2F3.11	SPAC2F3.11 exopolyphosphatase	0.0317748
1495	4	15	SPBC19C2.09	SPBC19C2.09 sre1 sterol regulatory element binding protein	0.0321428
1418	4	12	SPBC1539.02	SPBC1539.02 sequence orphan	0.0326162
2103	6	8	SPAC1002.12c	SPAC1002.12c succinate-semialdehyde dehydrogenase	0.0327354
455	2	3	SPAC26A3.16	SPAC26A3.16 dph1 UBA domain protein Dph1	0.0334008
587	2	9	SPAC1B3.05	SPAC1B3.05 CCR4-Not complex subunit Not3/5	0.0334008
593	2	9	SPAC22H10.04	SPAC22H10.04 protein phosphatase type 2A	0.0334008
2159	6	10	SPAC806.07	SPAC806.07 ndk1 nucleoside diphosphate kinase	0.0334413
1300	4	7	SPBC1604.01	SPBC1604.01 mug158 sulfatase modifying factor 1 related	0.0334704
687	2	13	SPAC22F3.08c	SPAC22F3.08c rok1 ATP-dependent RNA helicase Rok1	0.0336538
382	1	16	SPAC1556.03	SPAC1556.03 azr1 serine/threonine protein phosphatase Azr1	0.0338778
137	1	6	SPBC1105.14	SPBC1105.14 rsv2 transcription factor Rsv2	0.0339824
1887	5	15	SPBC530.14c	SPBC530.14c dsk1 SR protein-specific kinase Dsk1	0.0339913
510	2	6	SPBC36.07	SPBC36.07 iki3 RNA polymerase II elongator subunit Iki3	0.034178
2658	7	15	SPAC57A10.07	SPAC57A10.07 conserved protein (fungal and protazoan)	0.0342014
2146	6	10	SPCC1393.08	SPCC1393.08 transcription factor	0.0342737
2866	8	8	SPAC4A8.14	SPAC4A8.14 prs1 ribose-phosphate pyrophosphokinase Prs1	0.034328
227	1	10	SPAC25A8.01c	SPAC25A8.01c fun thirty related protein Fft3	0.0344657
2958	8	12	SPBC354.01	SPBC354.01 gtp1 GTP binding protein Gtp1	0.0349673
2937	8	11	SPAC8F11.05c	SPAC8F11.05c mug130 sequence orphan	0.0350973
1533	4	16	SPCC584.01c	SPCC584.01c sulfite reductase NADPH flavoprotein subunit	0.0352133
2168	6	11	SPBC1271.01c	SPBC1271.01c pof13 F-box protein Pof13	0.0353038
2383	7	4	SPCC63.06	SPCC63.06 human WDR89 family WD repeat protein	0.0353582
547	2	7	SPAC23D3.03c	SPAC23D3.03c GTPase activating protein	0.0353753
1509	4	15	SPBP8B7.09c	SPBP8B7.09c karyopherin	0.0355249
1642	5	5	SPAC23H3.11c	SPAC23H3.11c glucosidase	0.0357143
1916	5	16	SPAC13G6.08	SPAC13G6.08 Cdc20/Fizzy family WD repeat protein	0.0357143
2221	6	13	SPBC887.15c	SPBC887.15c sphingosine hydroxylase	0.035725
2482	7	8	SPAC3G9.01	SPAC3G9.01 sequence orphan	0.0358115
2446	7	6	SPAC7D4.08	SPAC7D4.08 sequence orphan	0.0359303
178	1	8	SPCC895.07	SPCC895.07 alp14 Mad2-dependent spindle checkpoint componen	0.036429
1815	5	12	SPBC18H10.20c	SPBC18H10.20c conserved fungal protein	0.0364569
1712	5	8	SPAC5D6.13	SPAC5D6.13 Golgi phosphoprotein 3 family	0.0365087
1600	5	3	SPAC23H3.12c	SPAC23H3.12c conserved protein (fungal and plant)	0.0365449
469	2	4	SPBC18H10.13	SPBC18H10.13 rps1402 40S ribosomal protein S14	0.0367746
2468	7	7	SPBC1105.13c	SPBC1105.13c sequence orphan	0.0370511
1219	4	3	SPAC5D6.04	SPAC5D6.04 auxin family	0.0370556
202	1	9	SPBC1105.09	SPBC1105.09 ubc15 ubiquitin conjugating enzyme Ubc15	0.0370921
2090	6	8	SPBC1105.02c	SPBC1105.02c lys4 homocitrate synthase	0.0372154
17	1	1	SPAC1782.04	SPAC1782.04 cox24 mitochondrial mRNA processing protein Cox	0.0374467
2042	6	6	SPAPYUG7.04c	SPAPYUG7.04c rpb9 DNA-directed RNA polymerase II complex su	0.0374873
85	1	4	SPAC2C4.07c	SPAC2C4.07c ribonuclease II (RNB) family	0.0377133
2379	7	4	SPBC13E7.08c	SPBC13E7.08c RNA polymerase II associated Paf1 complex	0.0377753
1442	4	13	SPCC736.07c	SPCC736.07c cell polarity protein	0.0378803
1528	4	16	SPCC24B10.15	SPCC24B10.15 PINc domain	0.0378893
524	2	6	SPBPB2B2.11	0 SPBPB2B2.11 nucleotide-sugar 4,6-dehydratase"	0.0379065
2671	7	16	SPBP8B7.28c	SPBP8B7.28c sequence orphan	0.0379605
2381	7	4	SPBC36B7.06c	SPBC36B7.06c mug20 sequence orphan	0.0380497
493	2	5	SPAC20G8.08c	SPAC20G8.08c fft1 fun thirty related protein Fft1	0.0384615
2636	7	14	SPCC1450.12	SPCC1450.12 conserved fungal protein	0.0385284
2787	8	5	SPAC139.02c	SPAC139.02c oac1 anion transporter	0.0387024
1861	5	14	SPBC1683.08	SPBC1683.08 ght4 hexose transporter Ght4	0.0387538
1485	4	14	SPCC553.01c	SPCC553.01c meiotic chromosome segregation protein	0.0387946
2361	7	3	SPCC18B5.09c	SPCC18B5.09c sequence orphan	0.0390482
2461	7	7	SPAC25B8.08	SPAC25B8.08 conserved fungal family	0.0390482
1997	6	4	SPCC613.10	SPCC613.10 qcr2 ubiquinol-cytochrome-c reductase complex co	0.0392664
2678	7	16	SPAC1556.08c	SPAC1556.08c cbs2 protein kinase activator Snf4	0.0392992
443	2	3	SPAC19B12.10	SPAC19B12.10 sst2 human amsh protein homolog	0.0394737
3069	8	16	SPAC2F7.04	SPAC2F7.04 pmc2 RNA polymerase II holoenzyme mediator compl	0.0395871
2266	6	15	SPAC1834.10c	SPAC1834.10c sequence orphan	0.0396106
2716	8	2	SPBC17A3.08	SPBC17A3.08 TatD	0.0398952
2974	8	12	SPCC1827.08c	SPCC1827.08c pof7 F-box protein Pof7	0.0401862
1071	3	13	SPBC36B7.03	SPBC36B7.03 sec63 ER protein translocation subcomplex subun	0.0402604
59	1	3	SPBC3D6.05	SPBC3D6.05 ptp4 phosphatidate cytidylyltransferase Ptp4	0.0403566
2502	7	9	SPAC4G9.16c	SPAC4G9.16c rpl901 60S ribosomal protein L9	0.0403971
2217	6	13	SPBC21B10.07	SPBC21B10.07 glycosyl hydrolase family 16	0.0404443
990	3	10	SPAC30.01c	SPAC30.01c sec72 Sec7 domain	0.0408764
3041	8	15	SPAC11H11.02c	SPAC11H11.02c mug162 sequence orphan	0.0411732
1170	4	1	SPAC4H3.02c	SPAC4H3.02c sequence orphan	0.0412448
1313	4	7	SPAC3C7.06c	SPAC3C7.06c pit1 serine/threonine protein kinase Pit1	0.0415102
2945	8	11	SPAC1327.01c	SPAC1327.01c transcription factor	0.041847
285	1	12	SPBC29A3.03c	SPBC29A3.03c ubiquitin-protein ligase E3	0.04196
2985	8	13	SPBC12C2.12c	SPBC12C2.12c glo1 glyoxalase I	0.0421854
851	3	4	SPAC1782.09c	SPAC1782.09c clp1 Cdc14-related protein phosphatase Clp1/Fl	0.0422132
2656	7	15	SPCC1450.06c	SPCC1450.06c grx3 monothiol glutaredoxin Grx3	0.0424437
1595	5	3	SPBC1347.09	SPBC1347.09 hexaprenyldihydroxybenzoate methyltransferase	0.0426215
1319	4	7	SPCC24B10.19c	SPCC24B10.19c sequence orphan	0.0426748
2946	8	11	SPBC530.04	SPBC530.04 mod5 Tea1 anchoring protein Mod5	0.0428856
627	2	11	SPAC17C9.09c	SPAC17C9.09c tim13 TIM22 inner membrane protein import comp	0.0434901
888	3	5	SPBC17A3.06	SPBC17A3.06 phosphoprotein phosphatase	0.043549
1932	6	1	SPAC186.08c	SPAC186.08c L-lactate dehydrogenase	0.0436773
201	1	9	SPBC16D10.02	SPBC16D10.02 trm11 tRNA (guanosine) methyltransferase Trm11	0.0444545
561	2	8	SPBC16H5.11c	SPBC16H5.11c skb1 arginine N-methyltransferase Skb1	0.0446402
1655	5	5	SPAC16E8.06c	SPAC16E8.06c nop12 RNA-binding protein Nop12	0.0449134
2869	8	8	SPBP16F5.07	SPBP16F5.07 apm1 AP-1 adaptor complex subunit Apm1	0.0449683
1697	5	7	SPBC9B6.11c	SPBC9B6.11c cr4p-like	0.0450487
1214	4	3	SPAC23H3.13c	SPAC23H3.13c gpa2 heterotrimeric G protein alpha-2 subunit	0.0450954
2212	6	13	SPAC12B10.10	SPAC12B10.10 sequence orphan	0.0451246
1909	5	16	SPBC1685.07c	SPBC1685.07c amino acid transporter	0.045618
1254	4	5	SPAC1142.02c	SPAC1142.02c TPR repeat protein	0.0457132
856	3	4	SPBC23G7.04c	SPBC23G7.04c nif1 SEL1 repear protein Nif1	0.0457237
2310	7	1	SPAC3A11.11c	SPAC3A11.11c pyridoxal reductase	0.0460199
2339	7	2	SPAC26A3.17c	SPAC26A3.17c N-methyltransferase	0.0463615
845	3	4	SPAC15A10.10	SPAC15A10.10 mde6 Muskelin homolog	0.0465559
2494	7	8	SPAC823.15	SPAC823.15 ppa1 minor serine/threonine protein phosphatase	0.0466608
2489	7	8	SPCC1795.10c	SPCC1795.10c Sed5 Vesicle Protein Svp26	0.046821
1340	4	8	SPAC11D3.06	SPAC11D3.06 MatE family transporter	0.0468984
2680	7	16	SPBC20F10.05	SPBC20F10.05 DuF1740 family protein	0.0469246
1112	3	15	SPAC4G8.08	SPAC4G8.08 iron ion transporter	0.0471429
1116	3	15	SPAC139.06	SPAC139.06 hat1 histone acetyltransferase Hat1	0.0471429
233	1	10	SPBC1198.12	SPBC1198.12 mfr1 fizzy-related protein Mfr1	0.0471831
2370	7	3	SPCC1739.07	SPCC1739.07 substrate-specific nuclear cofactor for exosom	0.047222
1680	5	6	SPAC20H4.06c	SPAC20H4.06c RNA-binding protein	0.0472289
2395	7	4	SPAC56E4.07	SPAC56E4.07 N-acetyltransferase	0.0472673
2443	7	6	SPAC57A10.08c	SPAC57A10.08c esterase/lipase	0.0472673
2975	8	12	SPAC4F10.08	SPAC4F10.08 mug126 sequence orphan	0.0473046
1615	5	4	SPAC458.02c	SPAC458.02c mRNP complex	0.0473515
1394	4	11	SPCC5E4.05c	SPCC5E4.05c serine hydrolase	0.0475368
1638	5	5	SPBC1289.09	SPBC1289.09 tim21 mitochondrial inner membrane presequence	0.047619
911	3	6	SPAC1782.08c	SPAC1782.08c rex3 exonuclease Rex3	0.0479438
656	2	12	SPBC543.02c	SPBC543.02c DNAJ/TPR domain protein DNAJC7 family	0.0486937
175	1	8	SPAC12B10.14c	SPAC12B10.14c ppk2 serine/threonine protein kinase Ppk2	0.0489951
1113	3	15	SPCC4G3.09c	SPCC4G3.09c gyp3 GTPase activating protein Gyp3	0.04924
1121	3	15	SPAC22A12.07c	SPAC22A12.07c ogm1 protein O-mannosyltransferase Ogm1	0.04924
1089	3	14	SPAC1093.01	SPAC1093.01 PPR repeat protein	0.0493662
1067	3	13	SPBC2G2.15c	SPBC2G2.15c rRNA methyltransferase Mrm2	0.0493878
2836	8	7	SPAP7G5.03	SPAP7G5.03 conjugation protein	0.0495634
966	3	9	SPAC4G8.05	SPAC4G8.05 ppk14 serine/threonine protein kinase Ppk14	0.0495648
442	2	3	SPAC3H1.06c	SPAC3H1.06c membrane transporter	0.0495951
672	2	12	SPCC1322.15	SPCC1322.15 rpl3402 60S ribosomal protein L34	0.0498482
3023	8	14	SPBC8D2.03c	SPBC8D2.03c hhf2 histone H4 h4.2	0.0501166
1540	5	1	SPAC57A7.08	SPAC57A7.08 pzh1 serine/threonine protein phosphatase Pzh1	0.050227
2031	6	5	SPBP23A10.14c	SPBP23A10.14c ell1 RNA polymerase II transcription elongati	0.0502665
2079	6	7	SPBP4H10.18c	SPBP4H10.18c sequence orphan	0.0502665
1925	6	1	SPAC6C3.06c	3 SPAC6C3.06c P-type ATPase, calcium transporting"	0.0504148
2842	8	7	SPBC1773.01	SPBC1773.01 striatin homolog	0.0506427
2851	8	7	SPAC32A11.01	SPAC32A11.01 mug8 conserved fungal protein	0.0506427
1950	6	2	SPBC23E6.03c	SPBC23E6.03c nta1 protein N-terminal amidase Nta1	0.0509989
1904	5	16	SPAC22G7.03	SPAC22G7.03 sequence orphan	0.0512733
2579	7	12	SPBC32H8.01c	SPBC32H8.01c conserved fungal protein	0.0516578
2525	7	10	SPCC1223.10c	SPCC1223.10c eaf1 RNA polymerase II transcription elongatio	0.051773
2431	7	6	SPCC63.13	SPCC63.13 DNAJ domain protein	0.051876
2530	7	10	SPAC688.12c	SPAC688.12c sequence orphan	0.051941
838	3	3	SPAC2F3.02	SPAC2F3.02 ER protein translocation subcomplex subunit	0.0522621
2091	6	8	SPCC191.09c	SPCC191.09c gst1 glutathione S-transferase Gst1	0.0526877
2721	8	2	SPBC12D12.07c	SPBC12D12.07c trx2 mitochondrial thioredoxin Trx2	0.0528634
2515	7	9	SPAC1B3.06c	SPAC1B3.06c UbiE family methyltransferase	0.0530057
28	1	2	SPBP23A10.10	SPBP23A10.10 ppk32 serine/threonine protein kinase Ppk32	0.0530296
694	2	13	SPAC9.05	SPAC9.05 mfh1 ATP-dependent DNA helicase Mfh1	0.0533907
1018	3	11	SPCC550.14	SPCC550.14 vgl1 vigilin	0.0536443
1262	4	5	SPAC25B8.19c	SPAC25B8.19c transcription factor	0.0540047
2581	7	12	SPAC9.02c	SPAC9.02c N-acetyltransferase	0.0543
325	1	14	SPAC607.06c	SPAC607.06c metallopeptidase	0.0545264
1318	4	7	SPBC1271.09	SPBC1271.09 glycerophosphodiester transporter	0.0551558
1543	5	1	SPAC3F10.05c	SPAC3F10.05c mug113 DUF1766 family protein	0.0555886
2738	8	3	SPBP8B7.02	SPBP8B7.02 sequence orphan	0.0556413
1030	3	11	SPBP4H10.04	SPBP4H10.04 ppb1 calcineurin catalytic subunit Ppb1	0.0559958
490	2	5	SPAC3H1.10	SPAC3H1.10 phytochelatin synthetase	0.0560054
868	3	5	SPBC29A3.13	SPBC29A3.13 PWWP domain protein	0.0561342
351	1	15	SPAC16E8.18	SPAC16E8.18 sequence orphan	0.056416
2615	7	13	SPBC13E7.07	SPBC13E7.07 sequence orphan	0.0568559
2492	7	8	SPAC1687.07	SPAC1687.07 conserved fungal protein	0.0578306
1659	5	6	SPAC20G4.04c	SPAC20G4.04c hus1 checkpoint clamp complex protein Hus1	0.0578437
739	2	15	SPAC23G3.05c	SPAC23G3.05c regulator of G-protein signaling (RGS) domain	0.0581192
1755	5	10	SPAC222.08c	SPAC222.08c imidazoleglycerol-phosphate synthase	0.0581317
863	3	4	SPAC1751.01c	SPAC1751.01c gti1 gluconate transporter inducer Gti1	0.0583808
1303	4	7	SPAP27G11.10c	SPAP27G11.10c nup184 nucleoporin Nup184	0.0591225
348	1	15	SPBC1604.18c	SPBC1604.18c vacuolar sorting protein	0.0591379
1599	5	3	SPBC3B8.05	SPBC3B8.05 diphthamide biosynthesis protein	0.059247
1569	5	2	SPAC589.07c	SPAC589.07c WD repeat protein Atg18	0.0592532
2629	7	14	SPAC926.05c	SPAC926.05c diphthamide biosynthesis protein Dph4	0.0592669
1714	5	8	SPAC688.03c	SPAC688.03c human AMMECR1 homolog	0.0592721
1187	4	2	SPBC530.08	SPBC530.08 transcription factor	0.0593289
473	2	4	SPBC21B10.04c	SPBC21B10.04c nrf1 GTPase regulator Nrf1	0.0593792
1809	5	12	SPAC637.03	SPAC637.03 conserved fungal protein	0.0593904
2823	8	6	SPAC13F5.07c	SPAC13F5.07c sequence orphan	0.0594383
2881	8	9	SPAC4H3.05	1 SPAC4H3.05 srs2 ATP-dependent DNA helicase, UvrD subfamily	0.0594523
2909	8	10	SPAC11D3.04c	SPAC11D3.04c SnoaL	0.0594723
1721	5	8	SPBC25H2.03	SPBC25H2.03 vacuolar protein involved in phosphoinositide	0.0595364
2740	8	3	SPAC1142.01	SPAC1142.01 DUF654 family protein	0.0596764
1556	5	1	SPBC646.02	SPBC646.02 cwf11 complexed with Cdc5 protein Cwf11	0.0600649
2298	6	16	SPAC14C4.09	9 SPAC14C4.09 agn1 glucan endo-1,3-alpha-glucosidase Agn1"	0.0600749
408	2	1	SPAC926.07c	SPAC926.07c dlc2 dynein light chain Dlc2	0.0601135
2786	8	5	SPBPJ4664.05	SPBPJ4664.05 conserved fungal protein	0.0604272
1855	5	14	SPAC56F8.05c	SPAC56F8.05c mug64 conserved fungal protein	0.0604611
2926	8	10	SPAC12B10.15c	SPAC12B10.15c ribonuclease H2 complex subunit	0.0604631
1532	4	16	SPAC12G12.09	SPAC12G12.09 sequence orphan	0.0606384
2873	8	8	SPCC1235.15	SPCC1235.15 dga1 diacylglycerol O-acyltransferase	0.060715
1833	5	13	SPAPB24D3.07c	SPAPB24D3.07c sequence orphan	0.0614811
89	1	4	SPBC106.12c	SPBC106.12c THO complex subunit	0.0618399
2708	8	1	SPAP14E8.02	SPAP14E8.02 transcription factor	0.0619916
2709	8	1	SPBC3H7.09	SPBC3H7.09 mug142 palmitoyltransferase	0.0621649
1704	5	7	SPAC15A10.09c	SPAC15A10.09c conserved fungal protein	0.0625
2272	6	15	SPAC732.02c	SPAC732.02c 6-phosphofructo-2-kinase	0.0625291
2750	8	3	SPAC14C4.14	SPAC14C4.14 atp1 F1-ATPase alpha subunit	0.0625596
1270	4	5	SPBC11C11.11c	SPBC11C11.11c ATP-dependent DNA helicase Irc3	0.0626076
2150	6	10	SPBC29A3.10c	SPBC29A3.10c atp14 F1-ATPase subunit H	0.0631452
2292	6	16	SPCC777.15	SPCC777.15 tRNA dihydrouridine synthase Dus4	0.0633885
2880	8	8	SPCC1494.01	SPCC1494.01 iron/ascorbate oxidoreductase family	0.0634104
558	2	8	SPBC365.01	SPBC365.01 sec14 cytosolic factor family	0.063476
686	2	13	SPAC630.05	SPAC630.05 gyp7 GTPase activating protein Gyp7	0.0637652
2372	7	3	SPAC3A12.13c	SPAC3A12.13c translation initiation factor eIF3 complex su	0.0639836
2321	7	1	SPCC24B10.02c	SPCC24B10.02c NAD/NADH kinase	0.0650522
621	2	10	SPBC29A3.18	SPBC29A3.18 cyt1 cytochrome c1	0.0651629
2024	6	5	SPCC23B6.02c	SPCC23B6.02c sequence orphan	0.0654607
981	3	9	SPAC23C11.14	SPAC23C11.14 zhf1 zinc ion transporter Zhf1	0.0655835
2182	6	11	SPBC32F12.03c	SPBC32F12.03c gpx1 glutathione peroxidase Gpx1	0.0656423
669	2	12	SPBC2A9.03	SPBC2A9.03 conserved protein (fungal and plant)	0.0660787
665	2	12	SPBC21C3.13	SPBC21C3.13 rps1901 40S ribosomal protein S19	0.0662955
295	1	13	SPAC8C9.14	SPAC8C9.14 prr1 transcription factor Prr1	0.0663512
2653	7	15	SPAC18B11.03c	SPAC18B11.03c N-acetyltransferase	0.0663969
1326	4	8	SPBC725.07	SPBC725.07 pex5 peroxisomal targeting signal receptor	0.06676
1627	5	4	SPBC32F12.11	SPBC32F12.11 tdh1 glyceraldehyde-3-phosphate dehydrogenase	0.067087
2582	7	12	SPBC800.07c	SPBC800.07c tsf1 mitochondrial translation elongation facto	0.06776
1954	6	2	SPBPB2B2.08	SPBPB2B2.08 conserved fungal protein	0.0677966
2997	8	13	SPAC22F8.03c	SPAC22F8.03c sequence orphan	0.068129
2846	8	7	SPAC16.04	SPAC16.04 dus3 tRNA dihydrouridine synthase Dus3	0.068234
1450	4	13	SPAC20G8.10c	SPAC20G8.10c beclin family protein	0.0689827
96	1	4	SPAC15A10.1	SPAC15A10.11 ubr11 N-end-recognizing protein	0.0690849
992	3	10	SPAC4H3.03c	4 SPAC4H3.03c glucan 1,4-alpha-glucosidase"	0.0691426
2474	7	8	SPBC15D4.05	SPBC15D4.05 conserved protein	0.0691543
570	2	8	SPBP4H10.16c	SPBP4H10.16c phosphatase activator	0.06934
2826	8	6	SPAC57A10.04	SPAC57A10.04 mug10 sequence orphan	0.0695106
2874	8	8	SPCC1183.06	SPCC1183.06 ung1 uracil DNA N-glycosylase Ung1	0.0695106
2193	6	12	SPAC6G10.10c	SPAC6G10.10c human hmmtag2 homolog	0.0695863
548	2	7	SPAC823.14	SPAC823.14 phosphoric monoester hydrolase	0.0696095
1804	5	12	SPCC70.04c	SPCC70.04c sequence orphan	0.0702096
2365	7	3	SPAC1B3.11c	SPAC1B3.11c ypt4 GTPase Ypt4	0.0702982
2677	7	16	SPAC959.05c	SPAC959.05c protein disulfide isomerase	0.0703579
2692	8	1	SPAC17H9.03c	SPAC17H9.03c rdl1 RAD51D-like protein 1	0.0705116
3043	8	15	SPBC21C3.19	SPBC21C3.19 DUF1960 family protein	0.0708963
1244	4	4	SPAC1071.05	SPAC1071.05 S-adenosylmethionine-dependent methyltransfera	0.0709539
2484	7	8	SPBC21H7.07c	SPBC21H7.07c his5 imidazoleglycerol phosphate dehydratase	0.0709876
2584	7	12	SPAC31G5.15	SPAC31G5.15 phosphatidylserine decarboxylase	0.0710724
1215	4	3	SPAC17G6.03	SPAC17G6.03 phosphoprotein phosphatase	0.0712
1444	4	13	SPAC1071.03c	SPAC1071.03c sequence orphan	0.0714168
1924	6	1	SPAC1805.16c	SPAC1805.16c purine nucleoside phosphorylase	0.0714746
3000	8	13	SPCP1E11.07c	SPCP1E11.07c cwf18 complexed with Cdc5 protein Cwf18	0.0715101
1786	5	11	SPBC543.03c	SPBC543.03c pku80 Ku domain protein Pku80	0.0715796
2701	8	1	SPAC227.17c	SPAC227.17c conserved protein (fungal and plant)	0.0715806
715	2	14	SPBC28E12.06c	SPBC28E12.06c lvs1 beige protein homolog	0.071739
440	2	3	SPAC3F10.02c	SPAC3F10.02c trk1 potassium ion transporter Trk1	0.0718623
444	2	3	6 SPAC4F8.11	6 SPAC4F8.11 WD repeat protein, human WDR24 family"	0.0718623
615	2	10	SPBC215.06c	SPBC215.06c human LYHRT homolog	0.0718623
652	2	12	SPBC342.06c	SPBC342.06c rtt109 RTT109 family histone lysine acetyltrans	0.0718623
1829	5	13	SPAC31G5.12c	SPAC31G5.12c maf1 repressor of RNA polymerase III Maf1	0.0720604
39	1	2	SPAC6B12.02c	SPAC6B12.02c mus7 DNA repair protein Mus7	0.0720773
646	2	11	SPAC8F11.03	SPAC8F11.03 msh3 MutS protein homolog 3	0.0721837
2659	7	15	SPAC22E12.05c	SPAC22E12.05c rer1 Rer1 family protein	0.0722692
2934	8	11	SPAC1834.07	SPAC1834.07 klp3 kinesin-like protein Klp3	0.0727644
1864	5	14	SPBC3H7.12	SPBC3H7.12 sequence orphan	0.0731339
2559	7	11	SPBC3H7.14	SPBC3H7.14 mug176 BRCT domain protein	0.0733727
2290	6	16	SPCC1682.11c	SPCC1682.11c DUF580 family protein	0.0733771
1463	4	13	SPCC4B3.03c	SPCC4B3.03c DUF21 domain protein	0.0734915
415	2	2	SPBC14F5.13c	SPBC14F5.13c alkaline phosphatase	0.0738117
2726	8	2	SPCC1322.16	SPCC1322.16 phb2 prohibitin Phb2	0.0739084
38	1	2	SPAC13G6.15c	SPAC13G6.15c calcipressin	0.0739442
242	1	11	SPAC664.10	SPAC664.10 klp2 kinesin-like protein Klp2	0.0743169
763	2	16	SPBC28F2.08c	SPBC28F2.08c HRD ubiquitin ligase complex subunit	0.074854
2363	7	3	SPAC17C9.08	SPAC17C9.08 pnu1 endodeoxyribonuclease Pnu1	0.0754527
1222	4	3	SPBC11B10.07c	SPBC11B10.07c CDC50 domain protein	0.0754658
2564	7	11	SPCC1827.03c	SPCC1827.03c acetyl-CoA ligase	0.0757715
756	2	16	SPBC776.01	SPBC776.01 rpl29 60S ribosomal protein L29	0.0759799
142	1	6	SPAC13G6.09	SPAC13G6.09 zf-MYND type	0.0760401
2563	7	11	SPAC20H4.03c	SPAC20H4.03c tfs1 transcription elongation factor TFIIS	0.076138
2588	7	12	SPBC16A3.16	SPBC16A3.16 mitochondrial inner membrane protein involved	0.0761462
2229	6	13	SPCC965.13	SPCC965.13 membrane transporter	0.0761701
71	1	3	SPAC3A12.08	SPAC3A12.08 conserved fungal protein	0.0761797
1332	4	8	SPAC222.05c	SPAC222.05c mss1 COX RNA-associated protein	0.0761918
1278	4	6	SPBC2A9.11c	SPBC2A9.11c nuclear export factor	0.0762781
2839	8	7	SPAC11D3.01c	SPAC11D3.01c conserved fungal protein	0.0764617
1289	4	6	SPCC1442.17c	SPCC1442.17c DUF292 family protein	0.0771476
657	2	12	SPBC1718.02	SPBC1718.02 hop1 linear element associated protein Hop1	0.0772605
1432	4	12	SPCC132.01c	SPCC132.01c DUF814 family protein	0.0774596
1527	4	16	SPCC126.09	SPCC126.09 vacuolar membrane zinc transporter	0.0775086
2335	7	2	SPCC622.01c	SPCC622.01c sequence orphan	0.0776115
786	3	1	SPAC1805.01c	SPAC1805.01c ppk6 serine/threonine protein kinase Ppk6	0.0777382
1928	6	1	SPBPB10D8.07c	SPBPB10D8.07c membrane transporter	0.077833
423	2	2	SPBC19G7.04	SPBC19G7.04 HMG box protein	0.0780477
2729	8	2	SPBC2D10.05	9 SPBC2D10.05 exg3 glucan 1,3-beta-glucosidase Exg3"	0.0783063
711	2	14	SPBC216.02	SPBC216.02 mcp5 cortical anchoring factor for dynein Mcp5/N	0.0785136
2387	7	4	SPAC27D7.08c	SPAC27D7.08c DUF890 family protein	0.07861
1849	5	14	SPAC1D4.02c	SPAC1D4.02c human GRASP protein homolog	0.0789326
1279	4	6	SPBC2G5.04c	SPBC2G5.04c COPII-coated vesicle component Erv41/46	0.0790133
612	2	10	SPBC6B1.02	SPBC6B1.02 ppk30 Ark1/Prk1 family protein kinase Ppk30	0.079029
1830	5	13	SPBC30D10.16	SPBC30D10.16 pha2 phrenate dehydratase	0.0793987
874	3	5	SPCC23B6.03c	SPCC23B6.03c tel1 ATM checkpoint kinase	0.079566
2921	8	10	SPCC1620.02	SPCC1620.02 wtf23 wtf element Wtf23	0.0795829
2218	6	13	SPAC17G8.10c	SPAC17G8.10c dma1 mitotic spindle checkpoint protein Dma1	0.0796378
1395	4	11	SPAC1805.10	SPAC1805.10 sequence orphan	0.0798632
1483	4	14	SPCC1840.03	SPCC1840.03 sal3 karyopherin Sal3	0.0800467
281	1	12	SPBC1347.02	SPBC1347.02 fkbp39 FKBP-type peptidyl-prolyl cis-trans isom	0.0802372
1661	5	6	SPAC27F1.03c	SPAC27F1.03c uch1 ubiquitin C-terminal hydrolase Uch1	0.0803507
1339	4	8	SPCC18.17c	SPCC18.17c sequence orphan	0.0805261
2544	7	10	SPBC83.01	SPBC83.01 ucp8 UBA/EH/EF hand domain protein Ucp8	0.0807756
2228	6	13	SPBC20F10.02c	SPBC20F10.02c DUF1741 family protein	0.0813717
1885	5	15	SPBC365.08c	SPBC365.08c Der1-like (degradation in the ER) family	0.0814363
1953	6	2	SPBC1734.05c	SPBC1734.05c spf31 DNAJ protein Spf31	0.0814653
873	3	5	SPCC965.11c	SPCC965.11c amino acid transporter	0.0816848
1805	5	12	SPAC31G5.09c	SPAC31G5.09c spk1 MAP kinase Spk1	0.081985
775	3	1	SPCC645.13	SPCC645.13 transcription elongation regulator	0.0821467
1544	5	1	SPBC36B7.05c	SPBC36B7.05c phosphatidylinositol(3)-phosphate binding pro	0.0822981
668	2	12	SPCC1020.07	SPCC1020.07 haloacid dehalogenase-like hydrolase	0.082343
464	2	4	SPBC4B4.04	SPBC4B4.04 translation initiation factor eIF2A	0.0827429
550	2	7	SPAC8E11.02c	SPAC8E11.02c rad24 14-3-3 protein Rad24	0.082996
1955	6	2	SPBC215.10	SPBC215.10 haloacid dehalogenase-like hydrolase	0.0830677
1999	6	4	SPBC1683.02	SPBC1683.02 adenine deaminase	0.0831055
2227	6	13	SPCC364.01	SPCC364.01 sequence orphan	0.0831055
2312	7	1	SPBP35G2.04c	SPBP35G2.04c sequence orphan	0.0832366
734	2	15	SPAC630.09c	SPAC630.09c mug58 glycerate kinase	0.083388
2296	6	16	SPAC4F8.08	SPAC4F8.08 mug114 sequence orphan	0.0837604
1965	6	2	SPAC31A2.09c	SPAC31A2.09c apm4 AP-2 adaptor complex subunit Apm4	0.0839256
2607	7	13	SPBC428.02c	SPBC428.02c eca39 branched chain amino acid aminotransferas	0.0841409
1583	5	2	SPBP4G3.03	SPBP4G3.03 PI31 proteasome regulator related	0.0844156
2498	7	9	SPBC25H2.09	SPBC25H2.09 DUF1690 family protein	0.0845495
2380	7	4	SPBC30D10.05c	SPBC30D10.05c sepiapterin reductase	0.0848642
1690	5	7	SPAC11E3.08c	SPAC11E3.08c nse6 Smc5-6 complex non-SMC subunit Nse6	0.0852273
902	3	6	SPBC1685.14c	SPBC1685.14c Vid27 family protein	0.0853272
2220	6	13	SPAC227.04	SPAC227.04 autophagy C terminal domain family protein	0.0853637
488	2	5	SPAC3F10.06c	SPAC3F10.06c initiator methionine tRNA 2'-O-ribosyl phosph	0.0855263
1178	4	2	SPAC20G4.08	SPAC20G4.08 sequence orphan	0.0855917
16	1	1	SPBC1711.15c	SPBC1711.15c sequence orphan	0.0866152
1026	3	11	SPAC343.11c	SPAC343.11c msc1 multi-copy suppressor of Chk1	0.0868684
2768	8	4	SPBC106.13	SPBC106.13 conserved eukaryotic protein	0.0871019
846	3	4	SPAC26H5.05	SPAC26H5.05 IPT/TIG ankyrin repeat protein	0.0876984
154	1	7	SPAPJ691.03	SPAPJ691.03 DUF543 family protein	0.0877271
965	3	9	SPCC613.01	SPCC613.01 membrane transporter	0.0878775
1404	4	11	SPAC23C4.05c	SPAC23C4.05c LEA domain protein	0.0878801
376	1	16	SPAC11D3.07c	SPAC11D3.07c transcription factor	0.0882983
1873	5	15	SPAC22H12.01c	SPAC22H12.01c mug35 sequence orphan	0.0884346
501	2	5	SPAC24B11.08c	SPAC24B11.08c COPII-coated vesicle component Erv41/46	0.0885708
1903	5	16	SPAC589.03c	SPAC589.03c sequence orphan	0.0886039
1609	5	4	SPAC1952.06c	SPAC1952.06c DUF1716 family protein	0.0887171
1420	4	12	SPBC409.07c	SPBC409.07c wis1 MAP kinase kinase Wis1	0.0891448
3035	8	15	SPAC2G11.10c	SPAC2G11.10c URM1 activating enzyme	0.0894273
2813	8	6	SPAPB2B4.07	3 SPAPB2B4.07 ubiquitin family protein, human UBTD1 homolog	0.0897425
492	2	5	SPAC4G8.04	SPAC4G8.04 GTPase activating protein	0.0898851
2963	8	12	SPAC6G9.13c	SPAC6G9.13c bqt1 bouquet formation protein Bqt1	0.0899017
1497	4	15	SPCC1840.05c	SPCC1840.05c phosphomannomutase	0.0901152
379	1	16	SPBC21B10.10	SPBC21B10.10 rps402 40S ribosomal protein S4	0.0901607
533	2	7	SPAC17G8.07	SPAC17G8.07 YEATS family protein	0.0904419
869	3	5	SPCC569.07	SPCC569.07 aromatic aminotransferase	0.0905492
2224	6	13	SPAC6B12.09	SPAC6B12.09 trm10 tRNA m(1)G methyltransferase Trm10	0.0905652
3013	8	14	SPAC6C3.03c	SPAC6C3.03c sequence orphan	0.0906315
1066	3	13	SPAC6G9.14	SPAC6G9.14 RNA-binding protein	0.0908844
2879	8	8	SPAC19G12.08	SPAC19G12.08 fatty acid hydroxylase	0.0909318
470	2	4	SPBC83.05	SPBC83.05 RNA-binding protein	0.0910931
565	2	8	SPBC19C7.02	SPBC19C7.02 ubr1 N-end-recognizing protein Ubr1	0.0910931
1402	4	11	SPAC20G8.04c	SPAC20G8.04c electron transfer flavoprotein-ubiquinone oxi	0.091343
1591	5	3	SPAC3G6.03c	SPAC3G6.03c Maf-like protein	0.091396
2798	8	5	SPAC11D3.16c	SPAC11D3.16c sequence orphan	0.0914998
1707	5	8	SPAC212.08c	SPAC212.08c S. pombe specific GPI anchored protein family	0.0915899
692	2	13	SPAC824.08	SPAC824.08 gda1 guanosine-diphosphatase Gda1	0.0916318
779	3	1	SPBC16E9.13	SPBC16E9.13 ksp1 serine/threonine protein kinase Ksp1	0.0916535
350	1	15	SPBC1711.14	SPBC1711.14 rec15 meiotic recombination protein Rec15	0.0916832
1683	5	7	SPAC24C9.15c	SPAC24C9.15c spn5 septin Spn5	0.0919041
2773	8	4	SPBC27B12.10c	SPBC27B12.10c tom7 mitochondrial TOM complex subunit Tom7	0.0919271
2553	7	11	SPCC663.09c	SPCC663.09c short chain dehydrogenase	0.0920939
422	2	2	SPBC800.04c	SPBC800.04c rpl4301 60S ribosomal protein L37a	0.092199
2320	7	1	SPBC19G7.09	SPBC19G7.09 ulp1 SUMO deconjugating enzyme Ulp1	0.0924584
2486	7	8	SPAC9E9.14	SPAC9E9.14 vps24 vacuolar sorting protein Vps24	0.0925539
409	2	2	SPAP32A8.03c	SPAP32A8.03c ubiquitin-protein ligase E3	0.0925895
2506	7	9	SPAC13D6.04c	SPAC13D6.04c btb3 BTB/POZ domain protein Btb3	0.0930067
2938	8	11	SPAC13G7.09c	SPAC13G7.09c sequence orphan	0.0934742
1933	6	1	SPBC3D6.04c	SPBC3D6.04c mad1 mitotic spindle checkpoint protein Mad1	0.0934829
1811	5	12	SPAP27G11.02	6 SPAP27G11.02 TPR repeat protein, unknown biological role"	0.0937207
2699	8	1	SPBC19C7.05	SPBC19C7.05 cell wall organization protein	0.0937573
375	1	16	SPAPB24D3.09c	SPAPB24D3.09c pdr1 ABC transporter Pdr1	0.0940498
2739	8	3	SPAC10F6.07c	SPAC10F6.07c mug94 sequence orphan	0.0942676
497	2	5	SPAC22G7.02	SPAC22G7.02 kap111 karyopherin Kap111	0.0944669
1503	4	15	SPAC29B12.10c	SPAC29B12.10c OPT oligopeptide transporter family	0.0949172
245	1	11	SPAC343.20	SPAC343.20 sequence orphan	0.0949524
2810	8	6	SPCC622.14	SPCC622.14 GTPase activating protein	0.0954853
2908	8	10	SPAC1071.12c	SPAC1071.12c stp1 low molecular weight phosphotyrosine prot	0.0957937
2611	7	13	SPAC22A12.03c	SPAC22A12.03c csn4 COP9/signalosome complex subunit Csn4	0.095894
1946	6	2	SPAC977.05c	SPAC977.05c conserved fungal protein	0.0959702
243	1	11	SPAC227.14	SPAC227.14 nicotinamide riboside kinase	0.0959818
886	3	5	SPCC553.08c	SPCC553.08c GTPase Ria1	0.0962545
1610	5	4	SPCC31H12.04c	SPCC31H12.04c rpl1202 60S ribosomal protein L12.1/L12A	0.0963822
2152	6	10	SPAC16E8.12c	SPAC16E8.12c sequence orphan	0.0967334
2153	6	10	SPAC14C4.06c	SPAC14C4.06c poly(A) binding protein Nab2	0.0967334
3039	8	15	SPCC285.15c	SPCC285.15c rps2802 40S ribosomal protein S28	0.0967662
1396	4	11	SPAC1039.03	SPAC1039.03 esterase/lipase	0.0968124
830	3	3	SPAC767.01c	SPAC767.01c vps1 dynamin family protein Vps1	0.096956
240	1	10	SPAC1635.01	SPAC1635.01 voltage-dependent anion-selective channel	0.0970651
2897	8	9	SPBC14C8.09c	SPBC14C8.09c conserved fungal protein	0.0971742
1646	5	5	SPAC664.07c	SPAC664.07c rad9 checkpoint clamp complex protein Rad9	0.0974026
819	3	3	SPCC320.03	SPCC320.03 transcription factor	0.0974108
2026	6	5	SPAC16C9.01c	SPAC16C9.01c carbohydrate kinase	0.0980727
2791	8	5	SPAC3A11.14c	SPAC3A11.14c pkl1 kinesin-like protein Pkl1	0.0984508
2964	8	12	SPBC19G7.18c	SPBC19G7.18c sequence orphan	0.0984508
2986	8	13	SPAC14C4.13	SPAC14C4.13 rad17 RFC related checkpoint protein Rad17	0.0984508
2991	8	13	SPBP8B7.27	SPBP8B7.27 mug30 ubiquitin-protein ligase E3	0.0984508
2358	7	3	SPAC19A8.14	SPAC19A8.14 aminoacyl-tRNA hydrolase	0.0984603
1888	5	15	SPAP27G11.08c	SPAP27G11.08c meu32 sequence orphan	0.0985103
618	2	10	SPBP8B7.06	SPBP8B7.06 rpp201 60S acidic ribosomal protein P2A subunit	0.0986601
1355	4	9	SPAC6G10.02c	SPAC6G10.02c tea3 cell end marker Tea3	0.0991076
1041	3	12	SPBC577.06c	SPBC577.06c phosphatidylinositol kinase	0.0991499
2226	6	13	SPBC1271.08c	SPBC1271.08c sequence orphan	0.0992346
149	1	7	SPAC30C2.05	SPAC30C2.05 erv14 cornichon family protein Erv14	0.0993572
2941	8	11	SPAC19E9.02	SPAC19E9.02 fin1 serine/threonine protein kinase Fin1	0.0994894
2088	6	7	SPBC685.03	SPBC685.03 sequence orphan	0.0999683
2605	7	13	SPAC1610.04	SPAC1610.04 mug99 meiotically upregulated gene Mug99	0.100047
667	2	12	SPBC27B12.05	SPBC27B12.05 WD repeat protein	0.100086
3009	8	14	SPCC18.15	5 SPCC18.15 WD repeat protein, human WRDR85 family"	0.100139
1090	3	14	SPAC9E9.03	SPAC9E9.03 leu2 3-isopropylmalate dehydratase Leu2	0.100225
2652	7	15	SPAC19D5.06c	SPAC19D5.06c din1 Dhp1p-interacting protein Din1	0.100267
2560	7	11	SPCC13B11.03c	SPCC13B11.03c hydroxyacylglutathione hydrolase	0.100855
1346	4	9	SPCC550.09	SPCC550.09 peroxin Pex32	0.100888
572	2	8	SPBPB2B2.12c	SPBPB2B2.12c UDP-glucose 4-epimerase	0.101313
764	2	16	SPCC1183.02	SPCC1183.02 glutathione S-transferase	0.10143
2267	6	15	SPBC3B9.13c	SPBC3B9.13c rpp102 60S acidic ribosomal protein Rpp1-2	0.101458
660	2	12	SPBC713.11c	SPBC713.11c pmp3 plasma membrane proteolipid Pmp3	0.101574
2223	6	13	SPCC1259.14c	SPCC1259.14c meu27 S. pombe specific UPF0300 family protein	0.10168
1753	5	10	SPAC1B3.03c	SPAC1B3.03c wis2 cyclophilin family peptidyl-prolyl cis-tra	0.102228
2136	6	9	SPBC839.17c	SPBC839.17c fkh1 FKBP-type peptidyl-prolyl cis-trans isomer	0.102267
935	3	7	SPAC6C3.08	SPAC6C3.08 gankyrin	0.102467
1783	5	11	SPAC458.04c	SPAC458.04c sequence orphan	0.102669
77	1	4	SPCC31H12.03c	SPCC31H12.03c transcriptional regulator	0.102722
2142	6	10	SPBC317.01	SPBC317.01 mbx2 MADS-box transcription factor Pvg4	0.102947
2745	8	3	SPAC23G3.04	SPAC23G3.04 DUF1711 family protein	0.102952
390	2	1	SPAC343.04c	SPAC343.04c gnr1 heterotrimeric G protein beta subunit Gnr1	0.10304
414	2	2	SPBC354.15	SPBC354.15 fap1 L-pipecolate oxidase	0.10304
1384	4	10	SPCC1259.09c	SPCC1259.09c pyruvate dehydrogenase protein x component	0.103123
2626	7	14	SPBC1347.11	SPBC1347.11 sro1 sequence orphan	0.103175
2555	7	11	SPCC1235.03	SPCC1235.03 SMR and CUE domain protein	0.103254
2990	8	13	SPAC664.13	SPAC664.13 sequence orphan	0.103962
2044	6	6	SPBC16A3.13	SPBC16A3.13 meu7 alpha-amylase homolog Aah4	0.104127
2717	8	2	SPCC1620.03	SPCC1620.03 mug163 sequence orphan	0.104223
374	1	16	SPAC105.02c	7 SPAC105.02c ankyrin repeat protein, unknown biological ro	0.10432
2175	6	11	SPCC1259.08	SPCC1259.08 conserved fungal protein	0.104499
2456	7	7	SPCPB16A4.04c	SPCPB16A4.04c trm8 tRNA (guanine-N7-)-methyltransferase cat	0.104693
1195	4	2	SPCC1753.02c	SPCC1753.02c git3 G-protein coupled receptor Git3	0.104852
2536	7	10	SPAC23C11.13c	SPAC23C11.13c hpt1 xanthine phosphoribosyltransferase	0.105142
336	1	14	SPAC167.07c	SPAC167.07c ubiquitin-protein ligase E3	0.105917
581	2	9	SPAC17H9.08	SPAC17H9.08 mitochondrial coenzyme A transporter	0.106203
2336	7	2	SPCC1322.06	SPCC1322.06 kap113 karyopherin Kap113	0.10629
2408	7	5	SPBC31F10.17c	SPBC31F10.17c sequence orphan	0.10629
1905	5	16	SPAC869.10c	SPAC869.10c proline specific permease	0.106528
3045	8	15	SPAC26H5.04	SPAC26H5.04 vacuolar import and degradation protein Vid28	0.106573
2630	7	14	SPAC17C9.12	SPAC17C9.12 MSP domain	0.106823
2604	7	13	SPAC1834.08	SPAC1834.08 mak1 histidine kinase Mak1	0.106839
151	1	7	SPAC630.07c	SPAC630.07c sequence orphan	0.107101
1104	3	14	SPCP25A2.02c	SPCP25A2.02c rhp26 SNF2 family helicase Rhp26	0.107115
100	1	5	SPAC6B12.15	SPAC6B12.15 cpc2 RACK1 homologue Cpc2	0.107697
641	2	11	SPAC22H10.07	SPAC22H10.07 scd2 scaffold protein Scd2	0.107802
2023	6	5	SPBC1683.07	SPBC1683.07 mal1 alpha-glucosidase Mal1	0.107833
557	2	8	SPBC1347.12	SPBC1347.12 actin-like protein Arp1	0.108642
272	1	12	SPCC622.17	SPCC622.17 apn1 AP endonuclease Apn1	0.108935
1734	5	9	SPBC18E5.13	SPBC18E5.13 translation initiation factor	0.1091
2635	7	14	SPAC2F3.07c	SPAC2F3.07c sequence orphan	0.109359
758	2	16	SPBC902.02c	SPBC902.02c ctf18 DNA replication factor C complex subunit	0.109678
2657	7	15	SPAC1783.06c	SPAC1783.06c atg12 autophagy associated protein Atg12	0.110017
413	2	2	SPBC12C2.05c	SPBC12C2.05c diacylglycerol binding protein Bzz1	0.110328
2294	6	16	SPBC16E9.16c	SPBC16E9.16c lsd90 sequence orphan	0.110413
1434	4	12	SPCC4G3.08	SPCC4G3.08 psk1 serine/threonine protein kinase Psk1	0.110573
2234	6	14	SPBC12C2.01c	SPBC12C2.01c sequence orphan	0.1107
1827	5	13	SPAC25H1.04	SPAC25H1.04 mug105 DUF1671 family protein	0.110848
1325	4	8	SPBC27B12.11c	SPBC27B12.11c transcription factor	0.110867
582	2	9	SPAC3A12.09c	SPAC3A12.09c urease accessory protein UreD	0.110975
754	2	16	SPBC651.02	SPBC651.02 nitrilase	0.11099
773	3	1	SPCC4B3.13	SPCC4B3.13 MatE family transporter	0.111027
796	3	2	SPAC20G4.02c	SPAC20G4.02c fus1 formin Fus1	0.111189
1927	6	1	SPBC1198.01	SPBC1198.01 glutathione-dependent formaldehyde dehydrogena	0.111311
844	3	4	SPAC22E12.11c	SPAC22E12.11c set3 histone lysine methyltransferase Set3	0.111541
2278	6	15	SPBC354.12	SPBC354.12 gpd3 glyceraldehyde 3-phosphate dehydrogenase Gp	0.111712
2378	7	4	SPAC8C9.09c	SPAC8C9.09c mug129 sequence orphan	0.111928
181	1	8	SPAC30D11.13	SPAC30D11.13 hus5 SUMO conjugating enzyme	0.111975
890	3	6	SPAC19A8.05c	SPAC19A8.05c sst4 sorting receptor for ubiquitinated membra	0.112107
2583	7	12	SPBC29A3.08	8 SPBC29A3.08 pof4 elongin-A, F-box protein Pof4"	0.112544
870	3	5	SPBC21C3.18	SPBC21C3.18 spo4 serine/threonine protein kinase Spo4	0.112808
2849	8	7	SPAC22A12.02c	SPAC22A12.02c mug103 sequence orphan	0.112921
2099	6	8	SPBC2D10.07c	SPBC2D10.07c mitochondrial inner membrane peptidase comple	0.113017
2585	7	12	SPCC757.02c	SPCC757.02c epimarase	0.113214
760	2	16	SPBP19A11.02c	SPBP19A11.02c sequence orphan	0.113455
916	3	7	SPBC30B4.06c	SPBC30B4.06c tRNA uridine 5-carboxymethylaminomethyl modif	0.113506
1226	4	4	SPAC1B3.08	SPAC1B3.08 COP9 signalosome complex subunit 12	0.113886
2966	8	12	SPBC1711.04	SPBC1711.04 methylenetetrahydrofolate reductase	0.113929
3042	8	15	SPAC3H1.03	9 SPAC3H1.03 mug151 transcriptional regulator, HCNGP-like"	0.113976
1505	4	15	SPAC56F8.12	SPAC56F8.12 conserved fungal protein	0.115104
899	3	6	SPAC1783.01	SPAC1783.01 FAD binding protein	0.115123
1160	4	1	SPAC12B10.01c	SPAC12B10.01c ubiquitin-protein ligase E3	0.115501
1411	4	11	SPACUNK4.10	SPACUNK4.10 hydroxyacid dehydrogenase	0.115501
512	2	6	SPBC4B4.10c	SPBC4B4.10c mug77 autophagy associated protein Atg5	0.115638
2000	6	4	SPBC409.16c	SPBC409.16c sequence orphan	0.115808
631	2	11	SPAC1851.03	SPAC1851.03 ckb1 CK2 family regulatory subunit	0.115995
12	1	1	SPBC146.10	SPBC146.10 mug57 meiotically upregulated gene Mug57	0.116263
397	2	1	SPAC1F7.11c	SPAC1F7.11c transcription factor	0.116265
772	3	1	SPBC1734.07c	SPBC1734.07c TRAPP complex subunit Trs85	0.11648
2999	8	13	SPBC336.13c	SPBC336.13c mitochondrial inner membrane peptidase complex	0.117044
2792	8	5	SPAC31G5.07	SPAC31G5.07 conserved fungal protein	0.117319
2843	8	7	SPBC8D2.16c	SPBC8D2.16c DUF171 family protein	0.117319
1664	5	6	SPAC186.09	SPAC186.09 pyruvate decarboxylase	0.117633
2518	7	9	SPBC336.05c	SPBC336.05c S-adenosylmethionine-dependent methyltransfera	0.117773
195	1	9	SPAC1B1.02c	SPAC1B1.02c NAD/NADH kinase	0.117909
1691	5	7	SPBC14C8.05c	SPBC14C8.05c meu17 glucan-alpha-1,4-glucosidase"	0.118101
2452	7	7	SPCC663.13c	SPCC663.13c N-acetyltransferase	0.118245
818	3	3	SPAC30.03c	SPAC30.03c tsn1 translin	0.118683
2202	6	12	SPAC10F6.08c	SPAC10F6.08c HMG box protein	0.118786
1586	5	3	SPAC637.10c	SPAC637.10c rpn10 19S proteasome regulatory subunit Rpn10	0.119048
842	3	4	SPAC1952.09c	SPAC1952.09c acetyl-CoA hydrolase	0.11984
2313	7	1	SPCC1795.06	SPCC1795.06 map2 P-factor	0.119865
925	3	7	SPBC16A3.18	SPBC16A3.18 cip1 RNA-binding protein Cip1	0.119893
1255	4	5	SPBC3E7.08c	SPBC3E7.08c rad13 DNA repair nuclease Rad13	0.120413
2293	6	16	SPCC777.10c	SPCC777.10c ubc12 ubiquitin conjugating enzyme Ubc12	0.121109
433	2	3	SPAC1687.06c	SPAC1687.06c rpl44 60S ribosomal protein L28/L44	0.12112
2915	8	10	SPAC30D11.06c	SPAC30D11.06c DUF300 family protein	0.121257
11	1	1	SPBC365.06	SPBC365.06 pmt3 SUMO	0.121286
1667	5	6	SPAC9G1.07	SPAC9G1.07 sequence orphan	0.121296
2406	7	5	SPBC14C8.11c	SPBC14C8.11c sequence orphan	0.121363
3044	8	15	SPCC594.01	SPCC594.01 DUF1769 family protein	0.122159
1336	4	8	SPBC428.17c	SPBC428.17c wpl1 conserved fungal protein	0.122288
349	1	15	SPAC13G7.07	SPAC13G7.07 arb2 argonaute binding protein 2	0.122397
1333	4	8	SPBP4G3.02	SPBP4G3.02 pho1 acid phosphatase Pho1	0.122555
1883	5	15	SPBC16E9.17c	SPBC16E9.17c rem1 meiosis-specific cyclin Rem1	0.12266
37	1	2	SPAC29B12.11c	SPAC29B12.11c human WW domain binding protein-2 ortholog	0.122841
343	1	15	SPAC8E11.07c	SPAC8E11.07c alp31 tubulin specific chaperone cofactor A	0.123477
1293	4	6	SPCC18B5.11c	SPCC18B5.11c cds1 replication checkpoint kinase Cds1	0.12354
1258	4	5	SPAC1F7.01c	SPAC1F7.01c spt6 transcription elongation factor Spt6	0.12361
710	2	14	SPBC8D2.19	SPBC8D2.19 mde3 serine/threonine protein kinase Mde3	0.123626
499	2	5	SPAC23D3.01	SPAC23D3.01 PWWP domain protein	0.123631
797	3	2	SPBC215.02	SPBC215.02 bob1 prefoldin subunit 5	0.123649
924	3	7	SPCC162.01c	SPCC162.01c RNA-binding protein	0.123998
2020	6	5	SPAC13G6.06c	SPAC13G6.06c gcv2 glycine cleavage complex subunit P	0.124046
2911	8	10	SPBP8B7.21	SPBP8B7.21 ubp3 ubiquitin C-terminal hydrolase Ubp3	0.124156
3016	8	14	SPAC3F10.15c	SPAC3F10.15c spo12 Spo12 family protein	0.124214
2819	8	6	SPAC26A3.02	SPAC26A3.02 myh1 adenine DNA glycosylase	0.124838
1972	6	3	SPAP7G5.04c	SPAP7G5.04c lys1 aminoadipate-semialdehyde dehydrogenase	0.125037
2119	6	9	SPBC16C6.09	SPBC16C6.09 ogm4 protein O-mannosyltransferase Ogm4	0.125056
2805	8	5	SPBC947.03c	SPBC947.03c sequence orphan	0.12539
2609	7	13	SPAC167.06c	SPAC167.06c mug143 sequence orphan	0.12556
2797	8	5	SPBC3B8.08	SPBC3B8.08 Sjogren's syndrome/scleroderma autoantigen 1 fa	0.126114
439	2	3	SPAC1805.09c	SPAC1805.09c fmt1 methionyl-tRNA formyltransferase Fmt1	0.126181
2939	8	11	SPCC18.06c	SPCC18.06c caf1 CCR4-Not complex subunit Caf1	0.126233
2225	6	13	SPCC162.03	SPCC162.03 short chain dehydrogenase	0.126291
2154	6	10	SPCC1494.03	SPCC1494.03 arz1 sequence orphan	0.126437
1048	3	12	SPBC2G2.14	SPBC2G2.14 sequence orphan	0.12671
765	2	16	SPBC2D10.15c	SPBC2D10.15c peptidyl-tRNA hydrolase Pth1	0.126739
2575	7	12	SPAC6C3.07	SPAC6C3.07 mug68 sequence orphan	0.126809
2790	8	5	SPBC839.04	SPBC839.04 rpl803 60S ribosomal protein L8	0.127055
2245	6	14	SPCC4G3.11	SPCC4G3.11 mug154 conserved fungal protein	0.127192
78	1	4	SPCC162.10	SPCC162.10 ppk33 serine/threonine protein kinase Ppk33	0.127405
2176	6	11	SPAC5D6.02c	SPAC5D6.02c mug165 sequence orphan	0.12749
2382	7	4	SPAC688.04c	SPAC688.04c gst3 glutathione S-transferase	0.12754
792	3	1	SPBC3H7.07c	SPBC3H7.07c phosphoserine phosphatase	0.127579
2120	6	9	SPCC825.04c	SPCC825.04c N-acetyltransferase	0.127986
513	2	6	SPBC16H5.08c	5 SPBC16H5.08c ribosome biogenesis ATPase, Arb family"	0.128182
1860	5	14	SPBC16E9.07	SPBC16E9.07 mug100 sequence orphan	0.12819
3011	8	14	SPAC926.02	SPAC926.02 conserved fungal protein	0.128367
2184	6	11	SPBC8D2.18c	SPBC8D2.18c adenosylhomocysteinase	0.128379
2231	6	13	SPAC1786.01c	SPAC1786.01c triacylglycerol lipase	0.128692
2634	7	14	SPBC800.12c	9 SPBC800.12c ubiquitin family protein, unknown"	0.129565
1930	6	1	SPAC14C4.01c	SPAC14C4.01c DUF1770 family protein	0.129954
1808	5	12	SPBC18H10.19	SPBC18H10.19 human UVRAG (UV radiation resistance) homolog	0.129997
344	1	15	SPAPB1E7.07	SPAPB1E7.07 glt1 glutamate synthase	0.130012
198	1	9	SPAP27G11.15	SPAP27G11.15 slx1 structure-specific endonuclease catalytic	0.13106
2858	8	8	SPBC887.11	SPBC887.11 pus2 tRNA pseudouridylate synthase Pus2	0.131101
2603	7	13	SPCC1393.10	SPCC1393.10 ctr4 copper transporter complex subunit Ctr4	0.13119
1602	5	3	SPBC1539.03c	SPBC1539.03c argininosuccinate lyase	0.131229
769	3	1	SPCC1450.05c	SPCC1450.05c rox3 RNA polymerase II holoenzyme mediator com	0.131354
144	1	6	SPAC15A10.16	SPAC15A10.16 bud6 actin interacting protein 3 homolog Bud6	0.132507
26	1	2	SPBC530.01	SPBC530.01 gyp1 GTPase activating protein Gyp1	0.132523
1147	3	16	SPAC105.01c	SPAC105.01c potassium ion/proton antiporter	0.132973
2840	8	7	SPBC106.20	SPBC106.20 exo70 exocyst complex subunit Exo70	0.133065
1080	3	13	SPAC1071.06	SPAC1071.06 arp9 SWI/SNF and RSC complex subunit Arp9	0.133101
913	3	7	SPCC1840.07c	SPCC1840.07c phosphoprotein phosphatase	0.133137
696	2	13	SPAP14E8.04	SPAP14E8.04 oma1 metallopeptidase Oma1	0.13332
1835	5	13	SPBC16E9.12c	SPBC16E9.12c pab2 poly(A) binding protein Pab2	0.133508
1618	5	4	SPCC1795.03	SPCC1795.03 gms1 UDP-galactose transporter Gms1	0.134174
984	3	9	SPAC12G12.07c	SPAC12G12.07c conserved fungal protein	0.134194
1520	4	16	SPBC342.03	4 SPBC342.03 1,3-beta-glucanosyltransferase"	0.134238
1388	4	10	SPAC11E3.04c	SPAC11E3.04c ubc13 ubiquitin conjugating enzyme Ubc13	0.134658
2500	7	9	SPCC70.03c	SPCC70.03c proline dehydrogenase	0.134781
98	1	5	SPAC5D6.08c	SPAC5D6.08c mes1 meiosis II protein Mes1	0.135517
156	1	7	SPBC1539.08	6 SPBC1539.08 arf6 ADP-ribosylation factor, Arf family"	0.135555
998	3	10	SPBC16E9.11c	SPBC16E9.11c pub3 ubiquitin-protein ligase E3	0.135944
1238	4	4	SPBC12C2.03c	SPBC12C2.03c FAD binding protein	0.136035
1524	4	16	SPAC824.09c	SPAC824.09c GTPase activating protein	0.136334
3014	8	14	SPCC188.12	SPCC188.12 spn6 septin Spn6	0.13656
1487	4	14	SPAC3A11.07	SPAC3A11.07 NADH dehydrogenase	0.136665
1458	4	13	SPAC6G10.03c	9 SPAC6G10.03c abhydrolase family protein, unknown biologic	0.13678
2297	6	16	SPAC17G8.11c	SPAC17G8.11c mannosyltransferase complex subunit	0.137065
712	2	14	SPBP16F5.08c	SPBP16F5.08c flavin dependent monooxygenase	0.137646
926	3	7	SPAC19B12.06c	SPAC19B12.06c protease	0.137671
247	1	11	SPAC890.07c	SPAC890.07c rmt1 type I ribosomal protein arginine N-methyl	0.13778
179	1	8	SPAC24H6.13	SPAC24H6.13 DUF221 family protein	0.138259
2988	8	13	SPCC13B11.04c	SPCC13B11.04c glutathione-dependent formaldehyde dehydroge	0.138522
1022	3	11	SPAC869.04	SPAC869.04 formamidase-like protein	0.138642
2600	7	13	SPAC18G6.12c	SPAC18G6.12c hypothetical protein	0.138846
1410	4	11	SPAC637.13c	SPAC637.13c cytoskeletal signaling protein	0.139468
1468	4	14	SPAC343.16	SPAC343.16 lys2 homoaconitate hydratase Lys2	0.139747
957	3	8	SPAC11E3.14	SPAC11E3.14 conserved protein	0.139767
1405	4	11	SPAC22H10.03c	SPAC22H10.03c kap114 karyopherin Kap14	0.140383
1558	5	1	SPCC61.03	SPCC61.03 conserved protein (broad species distribution)	0.140704
947	3	8	SPAC17H9.06c	SPAC17H9.06c conserved fungal protein	0.140826
2606	7	13	SPBC1711.06	SPBC1711.06 rpl401 60S ribosomal protein L2	0.140951
709	2	14	SPBC19F8.04c	SPBC19F8.04c nuclease	0.141096
2301	6	16	SPAC5H10.01	SPAC5H10.01 DUF1445 family protein	0.141168
1099	3	14	SPAC1006.03	SPAC1006.03c human CCDC131 homolog	0.142023
373	1	16	SPAC688.13	SPAC688.13 scn1 TatD DNase family Scn1	0.142297
459	2	4	SPBC119.04	SPBC119.04 mei3 meiosis inducing protein Mei3	0.142713
170	1	8	SPBC582.08	SPBC582.08 alanine aminotransferase	0.143135
2072	6	7	SPCC5E4.10c	SPCC5E4.10c sequence orphan	0.143174
148	1	7	SPAC6F6.09	SPAC6F6.09 NuA4 histone acetyltransferase complex subunit	0.143256
2255	6	14	SPAC922.04	SPAC922.04 sequence orphan	0.14337
2117	6	9	SPAP32A8.02	SPAP32A8.02 xylose and arabinose reductase	0.143913
3063	8	16	SPBC1718.03	SPBC1718.03 ker1 RNA polymerase I transcription factor subu	0.143949
221	1	10	SPCC74.05	SPCC74.05 rpl2702 60S ribosomal protein L27	0.144137
599	2	9	SPAC26F1.10c	SPAC26F1.10c pyp1 tyrosine phosphatase Pyp1	0.144391
2794	8	5	SPAC2H10.02c	SPAC2H10.02c 26S proteasome regulator	0.144414
2277	6	15	SPCC970.05	SPCC970.05 rpl3601 60S ribosomal protein L36	0.144508
489	2	5	SPAC1952.16	5 SPAC1952.16 rga9 RhoGAp, GTPase activator towards Rho/Rac/	0.14459
978	3	9	SPAC343.18	SPAC343.18 rfp2 ubiquitin-protein ligase E3	0.144701
97	1	5	SPAC1296.02	SPAC1296.02 cox4 cytochrome c oxidase subunit IV	0.145313
1053	3	12	SPAC13G6.01c	SPAC13G6.01c rad8 ubiquitin-protein ligase E3	0.145778
248	1	11	SPAPB17E12.14c	SPAPB17E12.14c 6-phosphofructo-2-kinase	0.145791
1464	4	13	SPBC16G5.07c	SPBC16G5.07c prohibitin	0.145952
841	3	4	SPBC19F8.03c	SPBC19F8.03c clathrin binding protein	0.146077
972	3	9	SPAC20H4.09	6 SPAC20H4.09 ATP-dependent RNA helicase, spliceosomal"	0.146537
514	2	6	SPBC577.13	SPBC577.13 syj2 inositol polyphosphate phosphatase	0.147099
2025	6	5	SPBC1861.06c	SPBC1861.06c mug131 S. pombe specific UPF0300 family protei	0.147622
1069	3	13	SPAC3G6.04	SPAC3G6.04 rnp24 RNA-binding protein Rnp24	0.148172
[truncated: 347 more rows]
