# Supplementary material for: Regulated Ire1-dependent mRNA decay requires no-go mRNA degradation to maintain endoplasmic reticulum homeostasis in S. pombe
Source: eLife journal article supplement (doi:10.7554/elife.29216), 2017-09-25
Supplement: supp [file elife-29216-supp-v2.zip › elife_poa_e29216_Supplementary_File_2.xlsx]

## Sheet: Table2.csv
gene	alias	chromosome	chromosome_position	transcript_position	reads_minusDTT	reads_+DTT	pausescore_minusDTT	pausescore_+DTT	mRNA-Seqratio	readratio_correctedformRNA-Seq	motif
SPAC1002.03c	gls2	I	1800841	2141	0.244	11.6748	3.7546	82.3366	1.01964	46.9256	ATCCTCAATTTTTGATGCATCCTGAAGATGAAGA				This table lists all the identified Ire1 cleavage sites.
SPAC1002.03c	gls2	I	1801301	1681	0.731301	35.0243	11.253	247.01	1.01964	46.9704	ATATATGGACATAAATGCATTAATGGCACCTACA				reads_minusDTT is the number of reads (or 0.244, the value of 1 read, if no reads were present) in the untreated sample.
SPAC1002.03c	gls2	I	1801529	1453	0.487534	19.4579	7.50203	137.228	1.01964	39.142	AACTATAATGCTGACTGCTGGCCTGGAAACTCTG				reads_plusDTT is the number of reads in the treated sample.
SPAC1002.03c	gls2	I	1800540	2442	0.244	10.8964	3.7546	76.8475	1.01964	43.7972	ATTCACTTTGACCATTGCAGTGTCAAAGATTGGC				pausescore is the ratio of the density at the cleavage site divided by the average density in the gene.
SPAC1002.03c	gls2	I	1801209	1773	0.244	4.6699	3.7546	32.9347	1.01964	18.7702	TTTTGCTGGTACTAGTGCTTTAGCCGCTAATTGG				mRNA-Seqratio is the ratio of mRNA-Seq reads for treated/untreated.
SPAC1002.03c	gls2	I	1802865	117	1.21884	22.5712	18.7551	159.184	1.01964	18.1619	TGAACAGGATGGGTTTGCACGGCGTAACAGAGAT				readratio_correctedformRNA-Seq was computed by taking the ratio of reads at the position for treated/untreated. This value was then corrected by the mRNA-Seq ratio.
SPAC1002.03c	gls2	I	1802064	918	0.487534	7.78317	7.50203	54.8911	1.01964	15.6568	ACCAAATTCTGACGTTGCCGTATTTTGGTCTAAC
SPAC1002.03c	gls2	I	1802920	62	0.243767	3.89158	3.75101	27.4455	1.01964	15.6568	TTTTTGCAATCTTTGGCAGTTGCCAAGGTGCATT
SPAC1002.03c	gls2	I	1800746	2236	0.244	3.11327	3.7546	21.9564	1.01964	12.5135	ACTCACCCGTCTATTGATAAGATCACAATATACC
SPAC1002.09c	dld1	I	1813605	62	0.243767	4.6699	0.683882	14.5134	1.15615	16.5699	TCACGTGTTTGCAGGTTAGTGAATGCAGACCGGC
SPAC1002.09c	dld1	I	1813650	17	0.243767	3.11327	0.683882	9.67559	1.15615	11.0466	TGTTGAACTCTGTGATTAAAAGATCGGCACTTTG
SPAC1002.09c	dld1	I	1812870	797	0.244	3.11327	0.684536	9.67559	1.15615	11.036	CCAAGGCTTTATCTCGTATCATTTCTAAGCAAGG
SPAC1002.11	gaa1	I	1817356	704	0.487534	6.22653	44.2025	120.414	1.21806	10.4851	AAAATAACTCGGACGTGCTTGAAGTCCTTTACCA
SPAC1002.11	gaa1	I	1817129	477	0.731301	25.6845	66.3038	496.707	1.21806	28.8339	TAATGAGGCCGGCGTTGCTTTAGCCATTAGTTTA
SPAC1002.11	gaa1	I	1817045	393	0.244	7.00485	22.1224	135.466	1.21806	23.5689	TATTACAACTTTACGTGCTCCTAGAGGTGATGCT
SPAC1002.11	gaa1	I	1816805	153	0.731301	9.3398	66.3038	180.621	1.21806	10.4851	TCATGTCTCAGAAAGTGCTCTTCTGCCTGGGCAA
SPAC1002.13c	psu1	I	1821981	1207	3.90027	64.6003	2.56836	32.2935	1.05568	15.6895	AATGGTGGCAGTGGTTGCACTGTTGGCATCACTT
SPAC1002.13c	psu1	I	1822581	607	4.38781	54.4822	2.8894	27.2355	1.05568	11.7619	GGTGCTGGTTCCTCTTGCGTTGAGGGTGCCTACT
SPAC1002.13c	psu1	I	1822368	820	1.70637	18.6796	1.12366	9.33788	1.05568	10.3697	CAAGGTGTTGCCATTTGCCAAACCGATTACCCTG
SPAC1002.13c	psu1	I	1822555	633	0.243767	7.78317	0.160522	3.89079	1.05568	30.2448	TGCCTACTGCTCTTATGCTTGCTCACCCGGTATG
SPAC1002.13c	psu1	I	1822078	1110	0.244	7.78317	0.160676	3.89079	1.05568	30.216	CTTGACTTCTCAACTTGCCAATTACAATGTCAAG
SPAC1002.13c	psu1	I	1822786	402	2.1939	26.4628	1.4447	13.2287	1.05568	11.4258	CTCCTCTAGTGTTGTTGCTAGCTCTAGCGAAGTT
SPAC1002.13c	psu1	I	1822265	923	0.243767	8.56148	0.160522	4.27986	1.05568	33.2693	ACGCTAACTACTTCCAATGGGAAGGCAAGGGTAC
SPAC1002.13c	psu1	I	1822284	904	0.244	7.00485	0.160676	3.50171	1.05568	27.1944	CCTTTATCTGTCACTGATAACGCTAACTACTTCC
SPAC1002.13c	psu1	I	1822668	520	0.243767	5.44822	0.160522	2.72355	1.05568	21.1714	TGCACTGATTTCCCTTCTGACCAAAGCGGTGTTG
SPAC1002.13c	psu1	I	1822086	1102	0.243767	4.6699	0.160522	2.33447	1.05568	18.1469	CAAAACCCCTTGACTTCTCAACTTGCCAATTACA
SPAC1002.13c	psu1	I	1823098	90	0.244	4.6699	0.160676	2.33447	1.05568	18.1296	TCACTTGCTTAACAAGCGTGATGTGTCCGTCGTT
SPAC1002.13c	psu1	I	1822796	392	0.244	4.6699	0.160676	2.33447	1.05568	18.1296	TCATTCCCACCTCCTCTAGTGTTGTTGCTAGCTC
SPAC1002.13c	psu1	I	1822664	524	0.731301	13.2314	0.481567	6.61433	1.05568	17.1387	CTGATTTCCCTTCTGACCAAAGCGGTGTTGTTGC
SPAC1002.13c	psu1	I	1822266	922	0.487534	8.56148	0.321045	4.27986	1.05568	16.6347	AACGCTAACTACTTCCAATGGGAAGGCAAGGGTA
SPAC1002.13c	psu1	I	1822675	513	0.487534	7.78317	0.321045	3.89079	1.05568	15.1224	TTACGATTGCACTGATTTCCCTTCTGACCAAAGC
SPAC1002.13c	psu1	I	1822076	1112	0.487534	7.00485	0.321045	3.50171	1.05568	13.6102	TGACTTCTCAACTTGCCAATTACAATGTCAAGAT
SPAC1002.13c	psu1	I	1822977	211	0.487534	5.44822	0.321045	2.72355	1.05568	10.5857	ACTGCTGCTGGAGACGCTGAGACCACCAGCTCGG
SPAC1002.13c	psu1	I	1822677	511	0.487534	5.44822	0.321045	2.72355	1.05568	10.5857	GTTTACGATTGCACTGATTTCCCTTCTGACCAAA
SPAC1002.15c	pmc5	I	1826773	132	0.244	3.11327	3.25811	28	0.702609	18.1599	ATCTCCCTTTTATAGTCACAAGTCCAACAACGAG
SPAC1002.15c	pmc5	I	1826762	143	0.244	3.11327	3.25811	28	0.702609	18.1599	ATAGTCACAAGTCCAACAACGAGATGTTAAAAAT
SPAC1002.16c	NA	I	1828814	555	0.244	4.6699	107.245	529.412	0.39931	47.93	ATTGGCACCTAGAATTGCTTACTTGTTTGCATCT
SPAC1006.01	psp3	I	5068790	951	0.244	12.4531	2.27734	31.0386	2.30456	22.1462	TGTGAATGCCGCTATTGCCGGTGGACTTTTCTTT
SPAC1006.01	psp3	I	5068749	910	0.244	15.5663	2.27734	38.7983	2.30456	27.6827	ATGTCCATCGGCGGTGATGCAAGTACTGCTCTTG
SPAC1006.01	psp3	I	5068994	1155	0.243767	13.2314	2.27517	32.9785	2.30456	23.5528	GATTGGATCTAACAGGGCTTCTATGATCCTTTCT
SPAC1006.01	psp3	I	5068748	909	0.244	8.56148	2.27734	21.3391	2.30456	15.2255	TATGTCCATCGGCGGTGATGCAAGTACTGCTCTT
SPAC1006.01	psp3	I	5068425	586	0.243767	6.22653	2.27517	15.5193	2.30456	11.0837	TACAATGAGACTGCCGGTGAAGGTGTTACTGCAT
SPAC1006.03c	red1	I	5071283	2066	0.243767	3.11327	8.01124	78.4954	0.767925	16.6312	TCGTCGATGTTGCTACTCGAATCGTCGAATATCA
SPAC1006.07	NA	I	5086340	778	0.487534	7.00485	0.152385	2.79531	0.990852	14.5006	ACCGTCACTGTTACTCAAGCCGTTATTTTCTGTA
SPAC1039.01	NA	I	5445588	239	0.244	7.00485	4.37341	43.0787	1.54382	18.5957	TCTCGGTTCTCGGTATGCTTCCCTCTGTCGCTTC
SPAC1039.01	NA	I	5446492	1143	0.244	12.4531	4.37341	76.5843	1.54382	33.059	TATCGCCTATTCCTATGCCAGAGACGGTATTCTT
SPAC1039.01	NA	I	5446529	1180	0.244	7.78317	4.37341	47.8652	1.54382	20.6619	TTTTCAGGTTGGATCGGCACGGTCAACCCATACA
SPAC1039.01	NA	I	5446915	1566	0.487534	11.6748	8.73846	71.7977	1.54382	15.5112	ATGGTATGCCATTTCAGCACGAAAATGGTTCAAA
SPAC1039.02	NA	I	5450171	455	0.244	3.11327	1.53849	5.98509	0.863484	14.7765	CGCATGAGTATTTTGTGCCTCATTGGAATGGTAC
SPAC1039.02	NA	I	5450325	609	2.1939	105.073	13.8332	201.997	0.863484	55.4649	CAACTTCAGTAGTAATGCTAATAACACTGTCGTT
SPAC1039.02	NA	I	5450292	576	0.244	9.3398	1.53849	17.9553	0.863484	44.3295	TGGTGTTCGAACCCTTGCTATGGGTTTTCTCTTC
SPAC1039.02	NA	I	5450046	330	0.244	7.00485	1.53849	13.4664	0.863484	33.2472	AAACGGCCTTTCTGATGCTTCTGATCCTCAGGGT
SPAC1039.02	NA	I	5451195	1479	0.244	4.6699	1.53849	8.97763	0.863484	22.1648	TAACGATTATCTTGCTGCTCTCAATCCTGGTTAC
SPAC1039.02	NA	I	5450706	990	0.243767	3.89158	1.53702	7.48136	0.863484	18.4883	CAATCTTCCTAAGCCTGCTACGCCTTTGTATTAT
SPAC1039.02	NA	I	5450248	532	0.731301	22.5712	4.61106	43.3919	0.863484	35.744	TTGGAGCAATTTGGTGGTGAATCCACTTACTTTA
SPAC1039.02	NA	I	5450191	475	0.244	7.00485	1.53849	13.4664	0.863484	33.2472	CATTGGAATGGTACGTATCTCGCTTCTAACGTTC
SPAC1039.02	NA	I	5449901	185	0.244	6.22653	1.53849	11.9702	0.863484	29.553	ACGGTTGGCTTGGTGGTCATCTTAGAGATGCTCG
SPAC1039.02	NA	I	5449925	209	0.244	6.22653	1.53849	11.9702	0.863484	29.553	GAGATGCTCGTTATAAAGCCGACTTTGGTGAATT
SPAC1039.02	NA	I	5450102	386	0.244	6.22653	1.53849	11.9702	0.863484	29.553	CCTATCTTCCCTACGATATTCTTACAATTGGTAA
SPAC1039.02	NA	I	5449895	179	0.243767	5.44822	1.53702	10.4739	0.863484	25.8836	ATACTCACGGTTGGCTTGGTGGTCATCTTAGAGA
SPAC1039.02	NA	I	5449962	246	0.243767	5.44822	1.53702	10.4739	0.863484	25.8836	ATCGTTTGCTTTGCGCATGAAGGAATTAGCTGAT
SPAC1039.02	NA	I	5449972	256	0.243767	5.44822	1.53702	10.4739	0.863484	25.8836	TTGCGCATGAAGGAATTAGCTGATTTTAAAGGTG
SPAC1039.02	NA	I	5450020	304	0.243767	5.44822	1.53702	10.4739	0.863484	25.8836	GTTGACACCGGTGATTTGCACGACGGAAACGGCC
SPAC1039.02	NA	I	5450074	358	0.243767	5.44822	1.53702	10.4739	0.863484	25.8836	CAGGGTATCTACACAAACAACATTTTCACCTATC
SPAC1039.02	NA	I	5450197	481	0.243767	5.44822	1.53702	10.4739	0.863484	25.8836	AATGGTACGTATCTCGCTTCTAACGTTCAAATTT
SPAC1039.02	NA	I	5450035	319	0.243767	4.6699	1.53702	8.97763	0.863484	22.186	TTGCACGACGGAAACGGCCTTTCTGATGCTTCTG
SPAC1039.02	NA	I	5450285	569	0.243767	4.6699	1.53702	8.97763	0.863484	22.186	CAAAACATGGTGTTCGAACCCTTGCTATGGGTTT
SPAC1039.02	NA	I	5450017	301	0.244	4.6699	1.53849	8.97763	0.863484	22.1648	ATGGTTGACACCGGTGATTTGCACGACGGAAACG
SPAC1039.02	NA	I	5450027	311	0.244	4.6699	1.53849	8.97763	0.863484	22.1648	CCGGTGATTTGCACGACGGAAACGGCCTTTCTGA
SPAC1039.02	NA	I	5450144	428	0.243767	3.89158	1.53702	7.48136	0.863484	18.4883	TGTACCAAGCCGCCATTTCTAATAACACGCATGA
SPAC1039.02	NA	I	5450227	511	0.243767	3.89158	1.53702	7.48136	0.863484	18.4883	ATTTACAACTCATCAAATGAATTGGAGCAATTTG
SPAC1039.02	NA	I	5450096	380	0.244	3.89158	1.53849	7.48136	0.863484	18.4706	TTTTCACCTATCTTCCCTACGATATTCTTACAAT
SPAC1039.02	NA	I	5450101	385	0.244	3.89158	1.53849	7.48136	0.863484	18.4706	ACCTATCTTCCCTACGATATTCTTACAATTGGTA
SPAC1039.02	NA	I	5450204	488	0.244	3.89158	1.53849	7.48136	0.863484	18.4706	CGTATCTCGCTTCTAACGTTCAAATTTACAACTC
SPAC1039.02	NA	I	5450236	520	0.244	3.89158	1.53849	7.48136	0.863484	18.4706	TCATCAAATGAATTGGAGCAATTTGGTGGTGAAT
SPAC1039.02	NA	I	5450009	293	0.487534	7.00485	3.07404	13.4664	0.863484	16.6395	ACTTGTTGATGGTTGACACCGGTGATTTGCACGA
SPAC1039.02	NA	I	5449969	253	0.243767	3.11327	1.53702	5.98509	0.863484	14.7906	GCTTTGCGCATGAAGGAATTAGCTGATTTTAAAG
SPAC1039.02	NA	I	5449990	274	0.243767	3.11327	1.53702	5.98509	0.863484	14.7906	GCTGATTTTAAAGGTGTAGACTTGTTGATGGTTG
SPAC1039.02	NA	I	5450033	317	0.487534	6.22653	3.07404	11.9702	0.863484	14.7906	ATTTGCACGACGGAAACGGCCTTTCTGATGCTTC
SPAC1039.02	NA	I	5450036	320	0.243767	3.11327	1.53702	5.98509	0.863484	14.7906	TGCACGACGGAAACGGCCTTTCTGATGCTTCTGA
SPAC1039.02	NA	I	5450182	466	0.975068	12.4531	6.14808	23.9403	0.863484	14.7906	TTTGTGCCTCATTGGAATGGTACGTATCTCGCTT
SPAC1039.02	NA	I	5450229	513	0.487534	6.22653	3.07404	11.9702	0.863484	14.7906	TTACAACTCATCAAATGAATTGGAGCAATTTGGT
SPAC1039.02	NA	I	5450252	536	0.487534	6.22653	3.07404	11.9702	0.863484	14.7906	AGCAATTTGGTGGTGAATCCACTTACTTTATTAC
SPAC1039.02	NA	I	5450282	566	0.731301	9.3398	4.61106	17.9553	0.863484	14.7906	TTACAAAACATGGTGTTCGAACCCTTGCTATGGG
SPAC1039.02	NA	I	5449862	146	0.244	3.11327	1.53849	5.98509	0.863484	14.7765	AATGGGGACAATTGAATTTCATTCATACTACGGA
SPAC1039.02	NA	I	5449891	175	0.244	3.11327	1.53849	5.98509	0.863484	14.7765	ACGGATACTCACGGTTGGCTTGGTGGTCATCTTA
SPAC1039.02	NA	I	5449897	181	0.244	3.11327	1.53849	5.98509	0.863484	14.7765	ACTCACGGTTGGCTTGGTGGTCATCTTAGAGATG
SPAC1039.02	NA	I	5449948	232	0.244	3.11327	1.53849	5.98509	0.863484	14.7765	TTTGGTGAATTCAAATCGTTTGCTTTGCGCATGA
SPAC1039.02	NA	I	5450087	371	0.244	3.11327	1.53849	5.98509	0.863484	14.7765	CAAACAACATTTTCACCTATCTTCCCTACGATAT
SPAC1039.02	NA	I	5450108	392	0.244	3.11327	1.53849	5.98509	0.863484	14.7765	TTCCCTACGATATTCTTACAATTGGTAATCACGA
SPAC1039.02	NA	I	5450126	410	0.244	3.11327	1.53849	5.98509	0.863484	14.7765	CAATTGGTAATCACGAATTGTACCAAGCCGCCAT
SPAC1039.02	NA	I	5450138	422	0.244	3.11327	1.53849	5.98509	0.863484	14.7765	ACGAATTGTACCAAGCCGCCATTTCTAATAACAC
SPAC1039.02	NA	I	5450146	430	0.244	3.11327	1.53849	5.98509	0.863484	14.7765	TACCAAGCCGCCATTTCTAATAACACGCATGAGT
SPAC1039.02	NA	I	5450237	521	1.70637	20.2362	10.7591	38.9031	0.863484	13.7342	CATCAAATGAATTGGAGCAATTTGGTGGTGAATC
SPAC1039.02	NA	I	5450180	464	0.731301	7.78317	4.61106	14.9627	0.863484	12.3255	ATTTTGTGCCTCATTGGAATGGTACGTATCTCGC
SPAC105.02c	NA	I	1745358	185	0.244	3.89158	1.32343	22.9018	1.13658	14.0325	ATGGTTCCCTAGAGTGCCTTGACTGGCTTTTAGA
SPAC1071.07c	rps1502	I	3868681	278	0.487534	5.44822	0.144815	2.93773	0.743111	15.0382	ACTTGCGTAACATGATCATCCTTCCCGAGATGGT
SPAC1071.10c	pma1	I	3873671	1007	4.87534	115.191	1.49919	22.6858	0.954555	24.7521	GTGTCCCTGTCGGTTTGCCCGCTGTCGTTACCAC
SPAC1071.10c	pma1	I	3873017	1661	5.85041	101.181	1.79902	19.9267	0.954555	18.1181	GTCTCCGCGTTAAAATGCTTACTGGTGATGCCGT
SPAC1071.10c	pma1	I	3874229	449	8.28808	86.3932	2.54861	17.0143	0.954555	10.9201	TTTGCGCTCTTCTTATGCTTAACGCTGTTGTCGG
SPAC1071.10c	pma1	I	3873727	951	0.244	36.5809	0.0750309	7.20427	0.954555	157.059	TCGTTCCGTTCGTCTTGCTCGTCTTTTGGAATAC
SPAC1071.10c	pma1	I	3872350	2328	1.21884	49.034	0.374796	9.65678	0.954555	42.1455	CAACACTACTATGATTGCTCAAGGTCAAAACCGT
SPAC1071.10c	pma1	I	3873577	1101	2.9252	93.398	0.899511	18.3939	0.954555	33.4488	TGCTATTGAATCCCTTGCTGGTGTCGAAGTTCTT
SPAC1071.10c	pma1	I	3873307	1371	1.4626	34.2459	0.449756	6.74442	0.954555	24.5291	TTCCAAGAAGGTTACTGCCTACGTTCAAGCTCCT
SPAC1071.10c	pma1	I	3872992	1686	4.63157	101.959	1.42423	20.08	0.954555	23.0621	TGATGCCGTCGATATTGCTAAGGAAACTGCTCGT
SPAC1071.10c	pma1	I	3872038	2640	1.95014	38.9158	0.599674	7.66411	0.954555	20.9055	TATCTTGTCTGAATCTGCTGGATTCGACCGTATG
SPAC1071.10c	pma1	I	3873634	1044	29.9833	576.733	9.21999	113.582	0.954555	20.1509	TATGGCTGTCGGTGCTGCTTACTTGGCTGAGAAG
SPAC1071.10c	pma1	I	3873703	975	2.9252	39.6942	0.899511	7.81739	0.954555	14.2157	TTTGGAATACACTCTTGCTATTACCATTATTGGT
SPAC1071.10c	pma1	I	3874156	522	1.95014	20.2362	0.599674	3.98534	0.954555	10.8709	GTTGAAAAAATCTCTTGCTCTTAAGGCTGTTGTC
SPAC1071.10c	pma1	I	3872491	2187	45.0969	464.655	13.8675	91.5095	0.954555	10.794	CATTTTCGCTGATGTTGCTACTTTGGCTATTGCT
SPAC1071.10c	pma1	I	3873979	699	1.70637	17.123	0.524715	3.37221	0.954555	10.5125	TACTGGTGAATCTCTTGCTGTTGACAAGCACTAT
SPAC1071.10c	pma1	I	3873648	1030	0.487534	16.3447	0.149919	3.21893	0.954555	35.1212	GTCGTTACCACCACTATGGCTGTCGGTGCTGCTT
SPAC1071.10c	pma1	I	3873732	946	0.487534	12.4531	0.149919	2.45252	0.954555	26.759	TTCTATCGTTCCGTTCGTCTTGCTCGTCTTTTGG
SPAC1071.10c	pma1	I	3872386	2292	1.70637	31.1327	0.524715	6.13129	0.954555	19.1136	CATTGGTATTGTTTTGGCTATCGGTACCTGGATT
SPAC1071.10c	pma1	I	3873033	1645	1.21884	19.4579	0.374796	3.83206	0.954555	16.7244	GAAGCCAAGCGTTTGGGTCTCCGCGTTAAAATGC
SPAC1071.10c	pma1	I	3874216	462	0.731301	10.8964	0.224878	2.14595	0.954555	15.6094	TATGCTTAACGCTGTTGTCGGTTTCGTTCAGGAA
SPAC1071.10c	pma1	I	3874166	512	0.975068	14.0097	0.299837	2.75908	0.954555	15.052	TTGTCGACGAGTTGAAAAAATCTCTTGCTCTTAA
SPAC1071.10c	pma1	I	3873440	1238	8.77561	116.748	2.69853	22.9923	0.954555	13.937	TGGCTGCTTCCCGTAAGCGTAAGGGTTTGGATGC
SPAC1071.10c	pma1	I	3873713	965	1.70637	21.7929	0.524715	4.2919	0.954555	13.3795	TTGCTCGTCTTTTGGAATACACTCTTGCTATTAC
SPAC1071.10c	pma1	I	3874329	349	1.21884	15.5663	0.374796	3.06564	0.954555	13.3795	CTCAAATTTATCATGTTTTTCGTTGGTCCTATTC
SPAC1071.10c	pma1	I	3872534	2144	1.70637	21.0146	0.524715	4.13862	0.954555	12.9017	TTCGTAACCAATTGTTGAACTTGGAATTGGTTGT
SPAC1071.10c	pma1	I	3873740	938	2.43767	27.2411	0.749593	5.36488	0.954555	11.7071	CTGCTGCCTTCTATCGTTCCGTTCGTCTTGCTCG
SPAC1071.10c	pma1	I	3873059	1619	2.68144	28.0194	0.824552	5.51816	0.954555	10.9469	GTCATGATACTGCTCGTACTATTTCTGAAGCCAA
SPAC10F6.01c	sir1	I	1205284	213	0.244	3.11327	0.372171	4.96436	0.556976	22.9082	TCACGCTGATCCCTTTGCTCACATTGCGGATGCT
SPAC10F6.01c	sir1	I	1205281	216	0.244	6.22653	0.372171	9.92871	0.556976	45.8163	CGCTGATCCCTTTGCTCACATTGCGGATGCTATT
SPAC10F6.01c	sir1	I	1203328	2169	0.243767	4.6699	0.371815	7.44653	0.556976	34.3951	ATTAATTGAAGGTTTGTCTGGTCCTCCTCTTACC
SPAC10F6.01c	sir1	I	1204082	1415	0.243767	3.89158	0.371815	6.20544	0.556976	28.6626	CTTCTGTCTCTTCTGAATCATTAGAAGTTCTTTC
SPAC10F6.01c	sir1	I	1203753	1744	0.243767	3.89158	0.371815	6.20544	0.556976	28.6626	TTGTATGCCATGAACTTTGGCAATGCATATGTCG
SPAC10F6.01c	sir1	I	1203357	2140	0.243767	3.89158	0.371815	6.20544	0.556976	28.6626	AACGTTGACTCACGCAATGCTCTCAACAAATTAA
SPAC10F6.01c	sir1	I	1205218	279	0.244	3.89158	0.372171	6.20544	0.556976	28.6352	ACCTAAACAAATCACATCTGTAGTTGCTTCTGCT
SPAC10F6.01c	sir1	I	1204941	556	0.244	3.89158	0.372171	6.20544	0.556976	28.6352	TATTCTCCAGTTTACGACACGACCGCTGCGTTGG
SPAC10F6.01c	sir1	I	1204109	1388	0.244	3.89158	0.372171	6.20544	0.556976	28.6352	TTGCTACTTTATTGAAAGAAAAGAATTCTTCTGT
SPAC10F6.01c	sir1	I	1203976	1521	0.244	3.89158	0.372171	6.20544	0.556976	28.6352	GGATTCATCTGCTCCTATCAAATCACTTTTAGAT
SPAC10F6.01c	sir1	I	1203719	1778	0.244	3.89158	0.372171	6.20544	0.556976	28.6352	CCTCTACTGCGTTGTATAGTTCATACACCCAACT
SPAC10F6.01c	sir1	I	1203626	1871	0.244	3.89158	0.372171	6.20544	0.556976	28.6352	TTCCCTATCACAGTGCTGACGATGATGCCATTAC
SPAC10F6.01c	sir1	I	1203303	2194	0.244	3.89158	0.372171	6.20544	0.556976	28.6352	CCTCTTACCATTCTTTTCGCTTCAGACGGAGGTA
SPAC10F6.01c	sir1	I	1201916	3581	0.244	3.89158	0.372171	6.20544	0.556976	28.6352	AGCACGCTCGTCTTAAGTATACCGTTGATACTCT
SPAC10F6.01c	sir1	I	1204940	557	0.243767	3.11327	0.371815	4.96436	0.556976	22.9301	ATTCTCCAGTTTACGACACGACCGCTGCGTTGGA
SPAC10F6.01c	sir1	I	1204476	1021	0.243767	3.11327	0.371815	4.96436	0.556976	22.9301	TCTTCTTTCGTCGCTTCCGGATCTTCAATTGAGC
SPAC10F6.01c	sir1	I	1204415	1082	0.243767	3.11327	0.371815	4.96436	0.556976	22.9301	CTTCAGAGCAAGCCACAGAGATTATTAAAGCTGT
SPAC10F6.01c	sir1	I	1204182	1315	0.487534	6.22653	0.743631	9.92871	0.556976	22.9301	ATCATATCTCCTCAGTTTGCTTTGGGTTCGGTTT
SPAC10F6.01c	sir1	I	1203665	1832	0.243767	3.11327	0.371815	4.96436	0.556976	22.9301	CAGATAAATTTAAGGGCCCCTCGGTTGTTTTGGC
SPAC10F6.01c	sir1	I	1202007	3490	0.243767	3.11327	0.371815	4.96436	0.556976	22.9301	GTTGTTGGCTATGTTCTAACTGATAAGATTATGG
SPAC10F6.01c	sir1	I	1205388	109	0.244	3.11327	0.372171	4.96436	0.556976	22.9082	AATTCGATTTTAAATGGTGCTTTAACAGAATCCT
SPAC10F6.01c	sir1	I	1204257	1240	0.244	3.11327	0.372171	4.96436	0.556976	22.9082	GTCTTTAAGTCTCGTCTTAACATTGTTAACGATC
SPAC10F6.01c	sir1	I	1204077	1420	0.244	3.11327	0.372171	4.96436	0.556976	22.9082	GTCTCTTCTGAATCATTAGAAGTTCTTTCGAATT
SPAC10F6.01c	sir1	I	1203930	1567	0.244	3.11327	0.372171	4.96436	0.556976	22.9082	TTTACCAACGTTTCACATTGGATTATCGGTTCCG
SPAC10F6.01c	sir1	I	1203698	1799	0.244	3.11327	0.372171	4.96436	0.556976	22.9082	CATACACCCAACTAATCTCGGCACTTTTAGAAGC
SPAC10F6.01c	sir1	I	1203688	1809	0.244	3.11327	0.372171	4.96436	0.556976	22.9082	ACTAATCTCGGCACTTTTAGAAGCAGATAAATTT
SPAC10F6.01c	sir1	I	1203478	2019	0.244	3.11327	0.372171	4.96436	0.556976	22.9082	TCGCCGAGAGCTCAAGACCTTTTTGGAAAGGGAT
SPAC10F6.01c	sir1	I	1202027	3470	0.244	3.11327	0.372171	4.96436	0.556976	22.9082	CATATCCTCGTTTGGCTACAGTTGTTGGCTATGT
SPAC10F6.03c	cts1	I	1212658	809	0.244	3.89158	0.975526	22.2593	0.838671	19.0171	TTCGTTTCGCACTGGATAAGATAAGTGTATCTCG
SPAC10F6.06	vip1	I	1217552	382	0.243767	5.44822	0.372832	5.40179	2.03168	11.0008	ATTCAACTAGACCAAAGCTATGGCGTTTCTTCAA
SPAC10F6.11c	atg17	I	1227493	1157	0.244	3.89158	8.71254	103	0.812135	19.6385	ATACAGAATTGCCAAACGTAAAGGTAATTCCTGA
SPAC10F6.12c	mam4	I	1229807	262	0.487534	21.0146	23.7	259.419	0.898231	47.9874	GTCGGCCTTTTAGAATGCTTATTAAGTGGCGGAA
SPAC10F6.12c	mam4	I	1229580	489	0.244	7.78317	11.8613	96.0811	0.898231	35.5123	CACTGATGGGATTTATGCTTACGTTAGACACCCA
SPAC10F6.12c	mam4	I	1229849	220	0.244	3.11327	11.8613	38.4324	0.898231	14.2049	TTCATATTGAATAATGGCAAAGCCTACTGGTTAG
SPAC10F6.13c	NA	I	1231765	251	0.243767	6.22653	0.714286	21.8667	0.957734	26.6702	TCACTAAGGCTGCGGCTGAAGTTCTTTTCAGACC
SPAC10F6.13c	NA	I	1230980	1036	0.244	3.11327	0.714968	10.9333	0.957734	13.3224	CTCAAAACCCCCGGTTCTTGGGATCATATTACAC
SPAC110.03	cdc42	I	1916347	77	0.243767	3.89158	0.621912	12.8667	0.869325	18.3641	TTTCCTATACTACAAACAAGTTTCCTAGTGACTA
SPAC110.03	cdc42	I	1916831	131	0.244	3.11327	0.622506	10.2933	0.869325	14.6772	ATTATGCTGTCACTGTCATGATCGGTGATGAACC
SPAC110.04c	pss1	I	1919961	198	0.487534	13.2314	0.473201	12.2488	1.39218	19.4941	ATCTAACTTTCGTAATACTGTCGGTAGCTTGAAG
SPAC110.04c	pss1	I	1919701	458	0.243767	4.6699	0.2366	4.32312	1.39218	13.7605	TCCCTGCTTGGTTTACTGATATTCAACGCCGTGC
SPAC110.04c	pss1	I	1918447	1712	0.244	4.6699	0.236826	4.32312	1.39218	13.7474	TGATTGCTACCGATAAGCTTGTTGCTGAGACTGT
SPAC110.04c	pss1	I	1918141	2018	0.244	4.6699	0.236826	4.32312	1.39218	13.7474	CTGCCAAGGCCGCTACTAAATCCGAAGCTGAAAA
SPAC110.04c	pss1	I	1919395	764	0.487534	7.00485	0.473201	6.48468	1.39218	10.3204	AATTCAAGGAAAAATACAAAATTGATGTTCTTTC
SPAC1142.02c	NA	I	3628812	73	0.487534	7.78317	1.31044	20.1691	0.765795	20.8468	ACCGGTTCGATTTCTGAAGAAGAAAAGGAAAGCT
SPAC1142.02c	NA	I	3628612	233	0.244	3.89158	0.655846	10.0846	0.765795	20.8269	ATTCCACTGCTCATGTTAATAAAGAAGAGGCTGA
SPAC1142.02c	NA	I	3628510	335	0.243767	3.11327	0.65522	8.06765	0.765795	16.6774	CTAAAGCCATAGAAATCGATCCTACCTCTCCAGT
SPAC1142.05	ctr5	I	3636181	417	0.244	4.6699	1.83333	31.9592	0.575859	33.2355	GTCGTTTAACGGATATGCCATTTTGTTCGGTTTC
SPAC1142.05	ctr5	I	3636016	252	0.487534	5.44822	3.66316	37.2857	0.575859	19.4059	TGATCGCTGGATTGTTGCTCACTCTAATGGCAAA
SPAC1142.05	ctr5	I	3635971	207	0.244	3.89158	1.83333	26.6327	0.575859	27.6962	CTTCGCCGTCGCTATTGAAGGTTTGTCCCTCGTT
SPAC1142.06	get3	I	3637220	119	0.243767	5.44822	1.25635	31.0762	0.826234	27.0506	CGTCGTGTTCATTGGCCATTCAAATGTCAAAAGT
SPAC1142.06	get3	I	3637309	208	0.243767	3.11327	1.25635	17.7578	0.826234	15.4575	TTTGGCACGAAATTTGGAAAAGACGCTCGTAAGG
SPAC11E3.12	NA	I	5306408	463	0.244	3.11327	2.64577	24.1481	0.645416	19.7691	TTAGTAGACATAATGGAAGCATTGACCCAAAAGA
SPAC11E3.13c	gas5	I	5307936	660	0.244	9.3398	2.24009	54.9134	1.13479	33.7313	TAACTCTTCTGTACGTGCTGACTTTTATGGTATG
SPAC11E3.13c	gas5	I	5307534	1062	1.95014	42.0291	17.9036	247.11	1.13479	18.992	TACCCTCACTTGTCCTGCTGACGATTCTTATTTT
SPAC11E3.13c	gas5	I	5307405	1191	0.244	4.6699	2.24009	27.4567	1.13479	16.8656	AGAGTTTAGTGCCAATGCTACTGCTTTAGTATCT
SPAC11E3.13c	gas5	I	5307201	1395	0.975068	14.788	8.95182	86.9463	1.13479	13.3647	TACAAGTTATACATCTGCTAGTGGTAGCTCTGCT
SPAC11E3.13c	gas5	I	5307399	1197	0.244	3.11327	2.24009	18.3045	1.13479	11.2438	TAGTGCCAATGCTACTGCTTTAGTATCTCCTGGT
SPAC11E3.13c	gas5	I	5307268	1328	0.243767	5.44822	2.23796	32.0328	1.13479	19.6954	CAACCACAGCCTCATCCTCTTCCGTATCCTCCGG
SPAC11E3.13c	gas5	I	5307269	1327	0.487534	7.78317	4.47591	45.7612	1.13479	14.0681	TCAACCACAGCCTCATCCTCTTCCGTATCCTCCG
SPAC11E3.13c	gas5	I	5307270	1326	0.243767	3.11327	2.23796	18.3045	1.13479	11.2545	GTCAACCACAGCCTCATCCTCTTCCGTATCCTCC
SPAC11E3.13c	gas5	I	5308062	534	0.244	3.11327	2.24009	18.3045	1.13479	11.2438	CAAGGCAGCTCTTCGCGATGCTAAAGAATACATC
SPAC11G7.01	NA	I	3960887	990	1.95014	77.8317	15.7555	264.532	1.10492	36.1209	TAACGGACGGCCTGTTGCTCCTAGACCTTCTGCC
SPAC11G7.01	NA	I	3960598	701	0.243767	4.6699	1.96944	15.8719	1.10492	17.3381	CTTTGCCCAGTAAATCTAACAAGTCAAGCAATCA
SPAC11G7.01	NA	I	3960577	680	0.244	4.6699	1.97132	15.8719	1.10492	17.3215	CTTCTTATTCTTCCAGTGGCACTTTGCCCAGTAA
SPAC11G7.01	NA	I	3960729	832	0.487534	8.56148	3.93888	29.0985	1.10492	15.8932	TCCAAACGAATTAAGGCTGAGCGCATGCAAGAAG
SPAC11G7.01	NA	I	3960319	422	0.244	3.89158	1.97132	13.2266	1.10492	14.4346	CCAGTGGGATGTCCAGTAGTTCCTTAAGCCATTC
SPAC11G7.01	NA	I	3960166	269	0.243767	3.11327	1.96944	10.5813	1.10492	11.5587	CATCAAGCAGCCAACAAAGCTCTAGTAGCAGTGC
SPAC11G7.01	NA	I	3960421	524	0.243767	3.11327	1.96944	10.5813	1.10492	11.5587	CAGCCAGCATTGTCAGTAGTACGTATCGAGATGG
SPAC11G7.01	NA	I	3960373	476	0.244	3.11327	1.97132	10.5813	1.10492	11.5477	GTTCTTCCTACCACAGCTCTTCCATGACTACGAG
SPAC11G7.01	NA	I	3960583	686	0.244	3.11327	1.97132	10.5813	1.10492	11.5477	ATTCTTCCAGTGGCACTTTGCCCAGTAAATCTAA
SPAC11G7.01	NA	I	3960789	892	0.244	3.11327	1.97132	10.5813	1.10492	11.5477	CAACCCTCCAATTTCCGTAGCCCAAATCGTGCTC
SPAC11G7.04	ubi1	I	3969192	184	0.975068	12.4531	0.231183	3.32546	0.981082	13.0178	TCTGACTACAACATTCAAAAGGAGTCTACCCTTC
SPAC11H11.06	arp2	I	4783481	377	0.244	3.11327	1.31628	18.4	0.967376	13.1896	AGACAATGTTTGAACGGTATGGTTTTGGTGGTGT
SPAC1250.03	ubc14	I	5098537	217	0.244	3.11327	3.25311	35.3208	-1	12.7593	TTTCAGCCTCCTACTATTGAGTTTACTACCAGAA
SPAC12B10.02c	NA	I	4576646	288	0.244	6.22653	1.83121	16.0453	1.06941	23.8622	CTGTAGAAATGTGTATGCAAAGATTAGCACTGAA
SPAC12B10.02c	NA	I	4576520	414	1.70637	38.9158	12.8062	100.283	1.06941	21.3259	TATCTTGCCTGCAAATGCTCCTGGTGCATACCAA
SPAC12B10.02c	NA	I	4576850	84	0.244	4.6699	1.83121	12.034	1.06941	17.8967	ATCGATTGCCATGAATGCGTTGAACGGTCAATCG
SPAC12B10.02c	NA	I	4576560	374	0.244	6.22653	1.83121	16.0453	1.06941	23.8622	TGGCCCGCATTGACAAAGAACGAGTTATTGGTAT
SPAC12B10.02c	NA	I	4576660	274	0.244	5.44822	1.83121	14.0397	1.06941	20.8794	TTGATTGAATTTCCCTGTAGAAATGTGTATGCAA
SPAC12B10.02c	NA	I	4576746	188	0.244	4.6699	1.83121	12.034	1.06941	17.8967	TATATCGCTTAACAAACATGGTAGAAGGAAATAC
SPAC12B10.02c	NA	I	4576691	243	0.243767	3.89158	1.82946	10.0283	1.06941	14.9281	ATTAATATTGGTTAGCGCTGTCTTTTTGACGTTG
SPAC12B10.02c	NA	I	4576639	295	0.244	3.89158	1.83121	10.0283	1.06941	14.9139	AATGTGTATGCAAAGATTAGCACTGAAGACAATC
SPAC12B10.02c	NA	I	4576769	165	0.243767	3.11327	1.82946	8.02266	1.06941	11.9425	TTTTGGTTTGGTGTTTATGGGGATATATCGCTTA
SPAC12B10.02c	NA	I	4576591	343	0.244	3.11327	1.83121	8.02266	1.06941	11.9311	TTGGCTGAAGAGAATCTTAAACATTTTTATATGG
SPAC12B10.02c	NA	I	4576690	244	1.70637	19.4579	12.8062	50.1416	1.06941	10.6629	TTAATATTGGTTAGCGCTGTCTTTTTGACGTTGA
SPAC12B10.02c	NA	I	4576839	95	0.487534	5.44822	3.65891	14.0397	1.06941	10.4497	TGAATGCGTTGAACGGTCAATCGAGAAATCTCTC
SPAC12B10.05	icp55	I	4584017	1189	0.244	3.11327	6.49954	61.5158	0.747998	17.0579	ACTAAACGGGAGATTACAGATATATTGTATCCGC
SPAC12B10.16c	mug157	I	4602080	975	0.244	6.22653	8.23367	51.8644	1.42374	17.9236	GCAAGCATCAGGTCATGCAGACATTGCTAGAACT
SPAC12B10.16c	mug157	I	4602374	681	1.21884	24.9061	41.129	207.458	1.42374	14.3526	TACTGTGAAATGGCTTGCGGCTGTTGAACGCATA
SPAC12B10.16c	mug157	I	4602758	297	0.487534	7.78317	16.4516	64.8305	1.42374	11.2129	TACAATTCGTTGGCATGCCGCTGATTCACATAAT
SPAC12B10.16c	mug157	I	4602140	915	0.244	4.6699	8.23367	38.8983	1.42374	13.4427	ATACTTTATTCCTGCTAATGCCATGATGGTTGTG
SPAC12B10.16c	mug157	I	4602561	494	0.244	3.89158	8.23367	32.4153	1.42374	11.2022	ATTGTAACGCTTTTCAGCCTCCTAAACAAAGCTT
SPAC12G12.02	efg1	I	345904	485	0.244	3.11327	2.64367	42.4615	0.612979	20.8152	CATCTTCAGGTTCCAACAGGGTTCCTGTACAGGA
SPAC12G12.03	cip2	I	344572	556	0.243767	5.44822	2.54185	46.7838	1.06359	21.0138	TCAACAACATACCCTTTTGATAGTTTAAATGCAT
SPAC12G12.03	cip2	I	344602	526	0.244	3.11327	2.54428	26.7336	1.06359	11.9964	TCTGGACCTGCTACTACCTCATTACTTTCCTCAA
SPAC12G12.04	mcp60	I	340197	1657	0.243767	4.6699	0.18662	3.52621	1.57568	12.1581	TTAATGGGTACCACCGAATGTGCCATCGTCGATG
SPAC12G12.04	mcp60	I	341753	101	0.244	4.6699	0.186798	3.52621	1.57568	12.1465	AAGTTCGTACATATGCTAAAGACTTAAAATTTGG
SPAC12G12.04	mcp60	I	341380	474	0.243767	3.89158	0.18662	2.93851	1.57568	10.1317	TGCTGTTGATAACGTCGTCGAATTTTTGCAAGCC
SPAC12G12.04	mcp60	I	341375	479	0.243767	3.89158	0.18662	2.93851	1.57568	10.1317	TTGATAACGTCGTCGAATTTTTGCAAGCCAATAA
SPAC12G12.04	mcp60	I	340234	1620	0.243767	3.89158	0.18662	2.93851	1.57568	10.1317	ACGTACCGGTTTAGTTGATGCTAGTGGAGTCGCC
SPAC12G12.04	mcp60	I	340400	1454	0.244	3.89158	0.186798	2.93851	1.57568	10.122	CTCGTCCCGCTCAAACCATTCTTGAAAATGCTGG
SPAC12G12.07c	NA	I	334870	164	0.243767	4.6699	1.0984	21.6105	0.763704	25.0846	TAGCTGCTAGCGATTCCAATTCTCTCAATGATGA
SPAC12G12.07c	NA	I	334939	233	0.243767	3.11327	1.0984	14.407	0.763704	16.7231	TGACGACATTGAATGAGTTGAAGGAGTTGTTAAG
SPAC12G12.07c	NA	I	334945	239	0.243767	3.11327	1.0984	14.407	0.763704	16.7231	CATTGAATGAGTTGAAGGAGTTGTTAAGCCAAAT
SPAC12G12.07c	NA	I	335410	704	0.243767	3.11327	1.0984	14.407	0.763704	16.7231	TTGAGCAACAGAGTATTAGTGATGACGAAGCCCG
SPAC12G12.07c	NA	I	334905	199	0.244	3.11327	1.09945	14.407	0.763704	16.7071	CAACGAAAAGCATTACAAGGTAAAGATGCTGTAT
SPAC12G12.07c	NA	I	335104	398	0.244	3.11327	1.09945	14.407	0.763704	16.7071	CAAGTTTGGTCCGTTTTCTACGATTTGCAAGCCA
SPAC1327.01c	NA	I	2205202	2892	0.243767	3.89158	21.2609	240.492	0.78942	20.2229	TAGCTTGGTTGCCTATGCTACAGGAAATCCCGGC
SPAC139.02c	oac1	I	1019843	730	0.487534	7.78317	1.89567	39.3061	0.799513	19.9676	TCTGGATTTGGTGTATGCTGCACCATGCAAATTT
SPAC1399.01c	NA	I	1853729	1103	0.243767	5.44822	35.4118	316.05	0.634421	35.2291	CGTCTGATGTCTCCATGCTGGAAGTAGATGGCCC
SPAC1399.01c	NA	I	1853395	769	0.244	3.11327	35.4456	180.6	0.634421	20.1117	TCCTTATGTCCTTCCGATACCTCTCCTCATGCTT
SPAC1399.02	NA	I	1846435	1454	0.243767	6.22653	15	211.343	1.27842	19.9801	CTTGTTCCGCATTTATGCTGCTAAGGAATATGGG
SPAC1399.03	fur4	I	1842507	1173	0.244	11.6748	5.18596	157.771	0.717698	66.6678	CATCGCCTCTATTATTGCCCTCTGCATGTGCCCA
SPAC1399.03	fur4	I	1842789	891	0.487534	13.2314	10.362	178.807	0.717698	37.8145	CATCACCGTTCCCCTTGCCTTTGGTGTAACTTCG
SPAC1399.03	fur4	I	1842981	699	0.244	3.11327	5.18596	42.0723	0.717698	17.7781	TTGGGCGCTCGTTAAAGCCCACGGCGCCGGTCCT
SPAC13A11.02c	erg11	I	575914	707	0.244	4.6699	0.875101	9.5794	0.721564	26.5242	GAGCCCACAAAATTATGCAAAAAACTTATCTTAA
SPAC13A11.02c	erg11	I	576327	294	0.975068	42.0291	3.49706	86.2146	0.721564	59.7365	ATTAGCTGATTTGAATGCTGAAGAAGCTTACTCT
SPAC13A11.02c	erg11	I	576521	100	0.243767	22.5712	0.874266	46.3004	0.721564	128.323	AATAGCAAACGCCCCCCAATTGTCTTCCATTGGA
SPAC13A11.02c	erg11	I	576480	141	0.731301	33.4676	2.6228	68.6524	0.721564	63.424	TGTAGGTTCTGCTGTCGCATACGGTATGGACCCT
SPAC13A11.02c	erg11	I	576509	112	0.243767	5.44822	0.874266	11.176	0.721564	30.9745	CCCCCAATTGTCTTCCATTGGATACCCTTTGTAG
SPAC13A11.02c	erg11	I	576125	496	0.244	5.44822	0.875101	11.176	0.721564	30.9449	TTCGGACCTGGTAAGGAAGGCGTTGCTGATTTGC
SPAC13A11.02c	erg11	I	576520	101	2.68144	57.5954	9.61692	118.146	0.721564	29.7677	ATAGCAAACGCCCCCCAATTGTCTTCCATTGGAT
SPAC13A11.02c	erg11	I	576490	131	0.243767	3.89158	0.874266	7.98283	0.721564	22.1246	GGATACCCTTTGTAGGTTCTGCTGTCGCATACGG
SPAC13A11.02c	erg11	I	576523	98	0.244	3.89158	0.875101	7.98283	0.721564	22.1035	GCAATAGCAAACGCCCCCCAATTGTCTTCCATTG
SPAC13A11.02c	erg11	I	576384	237	0.244	3.89158	0.875101	7.98283	0.721564	22.1035	TCGTAAAATGACCGCTTTCCTTGGTGTCCAAGGT
SPAC13A11.02c	erg11	I	576533	88	0.243767	3.11327	0.874266	6.38627	0.721564	17.6997	CTTACCTCTCGCAATAGCAAACGCCCCCCAATTG
SPAC13A11.02c	erg11	I	576448	173	0.243767	3.11327	0.874266	6.38627	0.721564	17.6997	CTTATGTATTTTTTCGCGAGTGTCGTGCCAAATA
SPAC13A11.02c	erg11	I	575956	665	0.487534	6.22653	1.74853	12.7725	0.721564	17.6997	TTTTCCCTTGGTTACCTCTCCCTAGAAACAGACG
SPAC13A11.02c	erg11	I	575930	691	0.243767	3.11327	0.874266	6.38627	0.721564	17.6997	AACAGACGCCGTGATAGAGCCCACAAAATTATGC
SPAC13A11.02c	erg11	I	576535	86	0.244	3.11327	0.875101	6.38627	0.721564	17.6828	AACTTACCTCTCGCAATAGCAAACGCCCCCCAAT
SPAC13A11.02c	erg11	I	576403	218	0.244	3.11327	0.875101	6.38627	0.721564	17.6828	TCACCTTTGTTTGCATGGGTCGTAAAATGACCGC
SPAC13A11.02c	erg11	I	576395	226	0.731301	8.56148	2.6228	17.5622	0.721564	16.2247	GTTTGCATGGGTCGTAAAATGACCGCTTTCCTTG
SPAC13A11.02c	erg11	I	576492	129	0.487534	5.44822	1.74853	11.176	0.721564	15.4873	TTGGATACCCTTTGTAGGTTCTGCTGTCGCATAC
SPAC13A11.02c	erg11	I	575819	802	0.487534	5.44822	1.74853	11.176	0.721564	15.4873	ATGAGCTGCAAGTATAGAGATGGCCGTCCTTTGA
SPAC13A11.05	NA	I	583200	709	0.243767	3.11327	1.7643	22.7601	0.967123	13.2056	CACGATGAGAAGTGGATTGATGAGCAAAAGATGA
SPAC13D6.02c	byr3	I	2248023	458	0.243767	3.11327	0.148148	2.79431	0.86826	14.7093	TTGAATGTCAACAAGCTTCAGATGGTCAACTTTG
SPAC13D6.02c	byr3	I	2248073	408	0.244	3.11327	0.14829	2.79431	0.86826	14.6952	CACTATGGGCGTGAAATGCTACTCTTGTGGTAAG
SPAC13D6.02c	byr3	I	2248052	429	0.244	3.11327	0.14829	2.79431	0.86826	14.6952	CTCTTGTGGTAAGATTGGACACCGCAGCTTTGAA
SPAC13F5.05	NA	I	2180607	536	0.244	3.89158	10.1208	61.3483	1.46253	10.9052	AAATGAAGCCGACTTTGCTGTACAAATCTCTTTC
SPAC13F5.05	NA	I	2180855	784	0.244	5.44822	10.1208	85.8876	1.46253	15.2672	TACTTAGCAACTTTTTGCTCAAAAAAATCCTGCA
SPAC13F5.05	NA	I	2180662	591	0.244	3.89158	10.1208	61.3483	1.46253	10.9052	TTTTTCATTTATGCCTGCAAAAGCTAATGTGAAT
SPAC13G6.02c	rps101	I	175228	542	0.243767	5.44822	0.11381	3.09796	0.930374	24.0227	CCAACGGTTGTTCCATGAAGGAGCTTGTCCAAAA
SPAC13G6.02c	rps101	I	175314	456	0.243767	3.89158	0.11381	2.21283	0.930374	17.1591	CAACCAAGTCAAGAAGACTACTTATGCTCAATCT
SPAC13G6.02c	rps101	I	175378	392	0.731301	8.56148	0.341431	4.86822	0.930374	12.5833	CCATCAAGACCACCGATGGTTACCTTTGCCGTAT
SPAC13G6.02c	rps101	I	175493	277	0.975068	10.1181	0.455241	5.75335	0.930374	11.1534	GTTGAGGACATCCAAGGTAAGAGCTGCCTCACCA
SPAC13G6.03	gpi7	I	177575	284	0.244	3.11327	9.78187	66	1.00281	12.7236	CCCCTACCGTTACAATGCCCAGACTGAAAGCTTT
SPAC13G6.03	gpi7	I	179027	1736	0.244	3.11327	9.78187	66	1.00281	12.7236	TCATCTGGAGCCTTTTGCTAATAAGTTTTCTCTC
SPAC13G6.03	gpi7	I	179071	1780	0.243767	8.56148	9.77253	181.5	1.00281	35.0233	TTTAAACAATTGCGATGCCAGCTTTCTCTATTCA
SPAC13G6.03	gpi7	I	177453	162	0.243767	3.89158	9.77253	82.5	1.00281	15.9197	GTTCGTGATGGTCGATGCTTTGAGAGCAGATTTC
SPAC13G6.03	gpi7	I	177879	588	0.244	7.00485	9.78187	148.5	1.00281	28.628	ATCGCATTCTTGGGACGCTTTAATACTACACTAC
SPAC13G6.04	tim8	I	180606	127	0.244	4.6699	0.517128	5.5	0.619835	30.8775	CACCAATTTACCTCTACTTGCTGGCCAAAGTGTA
SPAC13G6.04	tim8	I	180515	93	0.243767	3.11327	0.516634	3.66667	0.619835	20.6046	TGAGCAGCAGAAGGTTAAGCTACAGCAAGCAATT
SPAC13G6.07c	rps601	I	187119	443	0.243767	3.89158	0.091825	2.3968	0.905276	17.6348	GCTTCTTTAACTTGTCCAAGGAAGATGATGTCCG
SPAC13G6.09	NA	I	190557	236	0.244	3.89158	2.1449	20.0243	0.554553	28.7603	TCAACAGGGACGGAGACTCACAAACAGCAGGCTG
SPAC13G6.09	NA	I	190533	212	0.244	3.11327	2.1449	16.0194	0.554553	23.0082	ACCACAGAATATTGTATATATTCATCAACAGGGA
SPAC13G6.09	NA	I	190581	260	0.244	3.11327	2.1449	16.0194	0.554553	23.0082	CAGCAGGCTGGACGAGAGGTGTTAAAGTTTTTAG
SPAC13G6.10c	asl1	I	193831	56	0.975068	12.4531	0.876479	5.10884	1.21188	10.5386	CGACCGTTGGAGCTTTGCCCTATGCTCCTAACCA
SPAC13G6.10c	asl1	I	193401	486	0.244	23.3495	0.219329	9.57907	1.21188	78.9638	TAGCTCTTCTTATCCTGCTTCTAGTACTGAAGTT
SPAC13G6.10c	asl1	I	193521	366	0.243767	7.78317	0.21912	3.19302	1.21188	26.3464	TATGGACAACGTTACTGCACCCGTATGGTCCAAT
SPAC13G6.10c	asl1	I	193185	702	11.2133	341.681	10.0795	140.174	1.21188	25.1436	TTCTGTAGTTGCAAGTGCCAGTGTTTCTGCTGCT
SPAC13G6.10c	asl1	I	193275	612	0.244	7.00485	0.219329	2.87372	1.21188	23.6891	TGTCTCGTCTTCAGTTGCTTCTTCATCAGAGATA
SPAC13G6.10c	asl1	I	193209	678	5.36288	138.54	4.82063	56.8358	1.21188	21.3166	TTCCTCATCATCTATTGCTCTTTCTTCTGTAGTT
SPAC13G6.10c	asl1	I	192750	1137	6.58171	127.644	5.91623	52.3656	1.21188	16.003	TATAGATGCAGCTACTGCAGCTAGTTATTATCTT
SPAC13G6.10c	asl1	I	193532	355	0.243767	9.3398	0.21912	3.83163	1.21188	31.6157	CCTCTATATACTATGGACAACGTTACTGCACCCG
SPAC13G6.10c	asl1	I	193226	661	1.4626	56.0388	1.31472	22.9898	1.21188	31.6157	ACATCTTACGTCCCCACTTCCTCATCATCTATTG
SPAC13G6.10c	asl1	I	193696	191	0.243767	7.78317	0.21912	3.19302	1.21188	26.3464	CATATACTTCTTACTCCACTGGTTTAGCTTCTGT
SPAC13G6.10c	asl1	I	193547	340	0.243767	7.78317	0.21912	3.19302	1.21188	26.3464	ACTTTTGTTAGTACTCCTCTATATACTATGGACA
SPAC13G6.10c	asl1	I	193199	688	0.244	7.78317	0.219329	3.19302	1.21188	26.3213	TCTATTGCTCTTTCTTCTGTAGTTGCAAGTGCCA
SPAC13G6.10c	asl1	I	193475	412	0.243767	7.00485	0.21912	2.87372	1.21188	23.7118	GTATCAACTCCCGAGACATCTGCCACTTCTAGTT
SPAC13G6.10c	asl1	I	193414	473	0.244	7.00485	0.219329	2.87372	1.21188	23.6891	CCAGTTCCGAATCTAGCTCTTCTTATCCTGCTTC
SPAC13G6.10c	asl1	I	192437	1450	1.95014	44.3641	1.75296	18.2002	1.21188	18.7718	ATGACCAGCGCTCTTGGCTTTTTAGATGGACATG
SPAC13G6.10c	asl1	I	193700	187	0.243767	5.44822	0.21912	2.23512	1.21188	18.4425	TCCTCATATACTTCTTACTCCACTGGTTTAGCTT
SPAC13G6.10c	asl1	I	193225	662	1.4626	22.5712	1.31472	9.25977	1.21188	12.7341	CATCTTACGTCCCCACTTCCTCATCATCTATTGC
SPAC13G6.10c	asl1	I	193661	226	0.487534	7.00485	0.438239	2.87372	1.21188	11.8559	ACCGAGTCGTCCGACGATGGTGCTTCAACGGCTT
SPAC13G6.10c	asl1	I	193356	531	4.38781	61.487	3.94415	25.2249	1.21188	11.5632	TTCTGCTTCTAGTACTGAAGTTACTAGTTCTTAT
SPAC13G6.10c	asl1	I	193427	460	0.731301	9.3398	0.657359	3.83163	1.21188	10.5386	TCGTATCCTGCTACCAGTTCCGAATCTAGCTCTT
SPAC13G6.10c	asl1	I	193703	184	1.21884	15.5663	1.0956	6.38605	1.21188	10.5386	TCTTCCTCATATACTTCTTACTCCACTGGTTTAG
SPAC13G6.11c	erg12	I	194970	362	0.243767	3.11327	1.22603	12.96	0.752132	16.9804	CTTTGTCTTCTCCTTCTCAGGGTTGTACTTTAAC
SPAC13G6.11c	erg12	I	194551	781	0.243767	3.11327	1.22603	12.96	0.752132	16.9804	ACTGTGATTGACTCAATAATAGATGCAATCGATG
SPAC13G6.11c	erg12	I	194303	1029	0.243767	3.11327	1.22603	12.96	0.752132	16.9804	AACACCTGAGTGCAAAGAAGAGGAATTTAAGTTA
SPAC13G6.11c	erg12	I	195118	214	0.244	3.11327	1.22721	12.96	0.752132	16.9642	CCTTGGCAGCATGTAACAGTGGAAAACGTTCAGC
SPAC13G7.04c	mac1	I	2302389	402	0.243767	10.1181	7.00926	223.659	1.0015	41.4452	TACCTGTCTTGCTTTTGCTATTGAGCTGGTTCTC
SPAC13G7.04c	mac1	I	2302687	104	0.244	3.11327	7.01596	68.8182	1.0015	12.7402	CTACCCGTATGACTCTGGCTAAAGTCGAAGGTAC
SPAC13G7.08c	crb3	I	2311514	254	0.243767	3.11327	4.36808	65.4146	0.618912	20.6354	TTTGTGTGCAATCGAGTCCTTGTGGTTCTTGGCT
SPAC140.01	sdh2	I	1895626	163	0.243767	3.11327	0.698145	10.006	0.584349	21.8559	TATCGCTGGAACCCAGAGAAACCAGAAGTAAAGC
SPAC140.02	gar2	I	1897701	179	0.244	4.6699	0.26352	5.04927	0.650377	29.4275	AAAAGGAGGCTAAGCGTGCTTCTAGTCCCGAACC
SPAC140.02	gar2	I	1898271	749	0.244	4.6699	0.26352	5.04927	0.650377	29.4275	CTGAAGAAAGACCTGCTAAGATTACCAAGCCTTC
SPAC140.02	gar2	I	1898208	686	0.243767	3.89158	0.263269	4.20773	0.650377	24.5463	CCTCTGATTCTGAATCCGAATCCAGCTCTGAAGA
SPAC140.02	gar2	I	1898004	482	0.243767	3.11327	0.263269	3.36618	0.650377	19.637	TTGAAGAAAAGAAGGAGAGCTCTAGTGACTCTTC
SPAC140.02	gar2	I	1898049	527	0.244	3.11327	0.26352	3.36618	0.650377	19.6183	CCTCATCTGAATCTGAATCCGAATCTTCCTCATC
SPAC140.02	gar2	I	1898088	566	0.244	3.11327	0.26352	3.36618	0.650377	19.6183	CTGAGGAAGAAGAAGAGGTGGTCGAGAAGACTGA
SPAC1420.02c	cct5	I	1265341	200	0.243767	3.89158	1.00613	20.7197	0.766324	20.8324	TTTTAATCTCTCCAGATGGAGAGATTACGGTTAC
SPAC144.03	ade2	I	4655313	208	0.244	7.78317	0.445362	21.5347	0.928093	34.3696	TTTCACATTCTTCCTTCAGGACTCGTAAATCCTA
SPAC144.08	NA	I	4669046	173	0.243767	6.22653	4.13415	74.3014	0.673401	37.9313	CATCATGCCAGTCAGAGGCTAAAAACTTTTACAA
SPAC144.10c	gwt1	I	4671782	1160	0.244	3.89158	4.33015	37.7049	1.21354	13.1426	TATTCCCATCTTCTGTGCCATATGGAAGTCGCGT
SPAC144.10c	gwt1	I	4672492	450	0.244	10.1181	4.33015	98.0328	1.21354	34.1707	TTTCCCGAGGAGATATGCCAAAGTTGAAACCTGG
SPAC144.10c	gwt1	I	4672718	224	0.244	3.11327	4.33015	30.1639	1.21354	10.5141	CATCGAAAGTTGGCGTTTTCACTCTTTGCATAGC
SPAC144.10c	gwt1	I	4671702	1240	0.244	3.11327	4.33015	30.1639	1.21354	10.5141	TTGATTGCTAACGTTTTAACAGGAGTAGTTAATT
SPAC144.11	rps1102	I	4674743	132	0.243767	3.11327	0.123155	2.72	0.889131	14.364	CAAGACCCCTGCCGAAGCTATCTACGGTGAGTAT
SPAC144.18	vrg4	I	4690462	293	1.70637	78.61	13.0215	184.25	1.225	37.607	CTGCATCGAAGGCTTTGCAATTTCTTTCTGTTCC
SPAC144.18	vrg4	I	4690931	762	0.244	20.2362	1.86199	47.4306	1.225	67.7024	AATTTCTTACACCTCTGCCTGGTGTGTACGCGTA
SPAC144.18	vrg4	I	4691090	921	0.243767	11.6748	1.86022	27.3638	1.225	39.0964	TTCTGGTGTTGTTTATGCCGTTGCTAAATCTCAA
SPAC144.18	vrg4	I	4690979	810	0.243767	4.6699	1.86022	10.9455	1.225	15.6386	TTATAGTATGGTTGGTGCTCTTAACAAACTTCCC
SPAC144.18	vrg4	I	4690697	528	0.244	3.11327	1.86199	7.29701	1.225	10.4158	TAACTGTCTCACAAATGCTGCTTTTGTTCTCGCG
SPAC144.18	vrg4	I	4690291	122	0.244	9.3398	1.86199	21.891	1.225	31.2473	CGAGTCCTGGTTACAATATGAACTTTCTCCTTTT
SPAC144.18	vrg4	I	4690297	128	0.244	5.44822	1.86199	12.7698	1.225	18.2276	CTGGTTACAATATGAACTTTCTCCTTTTGACTGT
SPAC144.18	vrg4	I	4690294	125	0.244	3.89158	1.86199	9.12127	1.225	13.0197	GTCCTGGTTACAATATGAACTTTCTCCTTTTGAC
SPAC144.18	vrg4	I	4690259	90	0.244	3.11327	1.86199	7.29701	1.225	10.4158	ATTGATGACTTTGACCAATAAATATGTTCTTTCG
SPAC144.18	vrg4	I	4690375	206	0.244	3.11327	1.86199	7.29701	1.225	10.4158	TGAAAGTTATTAATTATAGGGATTTTGATTTTCG
SPAC144.18	vrg4	I	4690419	250	0.244	3.11327	1.86199	7.29701	1.225	10.4158	TTTTGGTTTCCTATTTCCTTTTTATTGGTAGCTA
SPAC144.18	vrg4	I	4690651	482	0.244	3.11327	1.86199	7.29701	1.225	10.4158	CATTTGCTTCCCAAACCTTAAATTCTGGCTATTT
SPAC1486.01	NA	I	3185555	86	0.244	3.89158	1.25741	19.0988	1.45284	10.9779	CTAAGGCTACTCTTCCCCCTTTACCTTATGCTTA
SPAC1486.01	NA	I	3185789	197	0.244	3.89158	1.25741	19.0988	1.45284	10.9779	ACTTGAATGCCGCTCAGGAGAAGCTGGCCGATCC
SPAC1486.02c	dsc2	I	3187533	338	0.243767	7.00485	8.952	148.103	0.742272	38.7134	CTTTTCTCTATTCTTTGCTTTTCAAAAACTTGGA
SPAC1486.05	nup189	I	3198336	1223	0.244	3.11327	3.92801	49.8785	0.872697	14.6205	TGGGTACAGGTTTGTTTGGTTTTGGCGCTAATAA
SPAC14C4.04	B22918-2	I	5234951	659	0.244	3.11327	2.5387	42.3158	0.978997	13.033	CTTATACTTATATTCCTGAATCGAAATACGTACC
SPAC14C4.07	NA	I	5241923	1132	0.244	16.3447	23.3355	495.549	1.23588	54.2014	TGTACAGAGGAATCATGCGAATTCCATCAGTACG
SPAC14C4.07	NA	I	5242378	1587	0.244	21.7929	23.3355	660.732	1.23588	72.2685	TGCACAGTTAGGCTATGCTATTGCTTTGAGTGCA
SPAC14C4.09	agn1	I	5244597	391	0.244	6.22653	3.36733	32.0755	1.90587	13.3894	ACATTTGCTGGAGAGACAGATACATTCGGTTATT
SPAC14C4.09	agn1	I	5244897	691	0.243767	5.44822	3.36412	28.066	1.90587	11.727	TACAAAAATTGGGCCTATAAAAGCGATTGGTTAA
SPAC14C4.09	agn1	I	5244573	367	0.243767	4.6699	3.36412	24.0566	1.90587	10.0517	TATGATGGTAAAGTGTTTGTTTCTACATTTGCTG
SPAC14C4.11	NA	I	5249559	1597	0.244	3.11327	1.24907	15.3927	0.714408	17.86	ATGACACCCGAACCTAGTCAACCCTCACCTTTGG
SPAC14C4.14	atp1	I	5257427	209	0.243767	5.44822	0.400447	10.5987	1.0928	20.4522	GTATCGCCCGTATCTCTGGTCTTTCCAACGTTCA
SPAC14C4.14	atp1	I	5257460	242	0.243767	3.11327	0.400447	6.05639	1.0928	11.687	AAGCAGAAGAACTCGTTGAGTTCTCATCTGGCAT
SPAC14C4.14	atp1	I	5257682	464	0.243767	3.11327	0.400447	6.05639	1.0928	11.687	AGACCACAGAACGCCGTCGTGTTCAACTTAAAGC
SPAC1527.02	sft2	I	4383496	241	0.244	3.11327	5.51436	51.5745	0.929706	13.724	CTAGGAAGTTTAGCATGCTACGCGATTGCTTGTT
SPAC1527.02	sft2	I	4383436	181	0.244	3.11327	5.51436	51.5745	0.929706	13.724	CAAAGCTCAGAATTTAGTTTATCTAGATGGGAAA
SPAC1527.02	sft2	I	4383455	200	0.244	3.11327	5.51436	51.5745	0.929706	13.724	TATCTAGATGGGAAAGGTATATGCTGTTTGGCAT
SPAC1556.02c	sdh1	I	3797954	370	0.244	3.11327	0.854539	15.6585	0.661285	19.2947	ACTGTCAAAGGATCAGATTGGTTGGGTGATCAAG
SPAC1556.02c	sdh1	I	3796487	1837	0.244	3.11327	0.854539	15.6585	0.661285	19.2947	CACAAAACAGGCGACCCTGTCACCTTGAAGTATC
SPAC1556.05c	cgr1	I	3801277	305	0.243767	3.11327	2.688	39.5294	0.626123	20.3977	GTCGGCGACGCAGAGAGAAGCGTAACAAAATGTT
SPAC1556.07	pmm1	I	3806248	173	0.243767	3.89158	0.302817	5.53648	0.783192	20.3837	GTAGTGATTTGAGCAAGCAACAAGAGCAACTGAG
SPAC1556.07	pmm1	I	3806375	300	0.244	3.89158	0.303106	5.53648	0.783192	20.3642	GTCATTCATCGCCTGGTTGGGAGAAGAAAAATAC
SPAC1556.07	pmm1	I	3806440	365	0.243767	3.11327	0.302817	4.42918	0.783192	16.307	TTGCTGATCTGGATATTCCCGTGAAGCGTGGTAC
SPAC1556.07	pmm1	I	3806779	704	0.243767	3.11327	0.302817	4.42918	0.783192	16.307	TTTTTGTCGACCCTCGTACTATCGGACATTCTGT
SPAC1565.07c	knd1	I	1304884	694	0.244	3.11327	15.2771	136.935	1.03318	12.3496	TCCGAGGTAAATATTTCTATTAAATTGCTTAACG
SPAC1565.08	cdc48	I	1306874	380	0.243767	6.22653	0.377428	8.26329	1.46815	17.3981	TCAATCCTTGTCCAGATATTAAATATGCTGAACG
SPAC1565.08	cdc48	I	1306868	374	0.243767	4.6699	0.377428	6.19747	1.46815	13.0486	TAACGATCAATCCTTGTCCAGATATTAAATATGC
SPAC1565.08	cdc48	I	1307327	833	0.243767	4.6699	0.377428	6.19747	1.46815	13.0486	TAATGGCTCGCGCAGTTGCTAATGAAACGGGCGC
SPAC1565.08	cdc48	I	1306471	33	0.243767	3.89158	0.377428	5.16456	1.46815	10.8738	CATGACCGATAAGAAACCAGAAGTGGAACACCTT
SPAC1565.08	cdc48	I	1307857	1363	0.243767	3.89158	0.377428	5.16456	1.46815	10.8738	ATTGACTTGGATGAAGATGAGATTGATGCCGAGG
SPAC1565.08	cdc48	I	1308556	2062	0.243767	3.89158	0.377428	5.16456	1.46815	10.8738	ACGCCTGTTGCTGAAGATGTTGACTTGCGTGCAG
SPAC1565.08	cdc48	I	1308721	2227	0.243767	3.89158	0.377428	5.16456	1.46815	10.8738	GACGATGTTGTTATGGACGAAGATGCATCTGTGT
SPAC1565.08	cdc48	I	1307096	602	0.244	3.89158	0.377789	5.16456	1.46815	10.8634	TTAGCCAGGATACAATTATTCATTGGGAAGGTGA
SPAC1565.08	cdc48	I	1307457	963	0.244	3.89158	0.377789	5.16456	1.46815	10.8634	TTCCCCTGCTATTATTTTTATTGATGAGATAGAT
SPAC1565.08	cdc48	I	1308050	1556	0.244	3.89158	0.377789	5.16456	1.46815	10.8634	AGATGCCTGTTATGTATGCCGAAAAGTTTTTGCG
SPAC15A10.04c	zpr1	I	3684032	1068	0.243767	5.44822	1.0706	14.8615	1.21374	18.4143	CACAACCATTGAAGGTCTTCTAGCTCAAGTTTAT
SPAC15A10.04c	zpr1	I	3683990	1110	0.244	4.6699	1.07162	12.7385	1.21374	15.7686	ATATGGCCGTGTGTTTTCTCAGGAGACCGATTCT
SPAC15A10.04c	zpr1	I	3684240	860	0.244	3.89158	1.07162	10.6154	1.21374	13.1405	TTATCATGTCTACTGTTTGTGATCGTTGTGGATA
SPAC15A10.04c	zpr1	I	3684148	952	0.243767	3.11327	1.0706	8.49231	1.21374	10.5224	TTAAAGGTCATGGATGCCGAGGACTTATCCCGTG
SPAC15A10.04c	zpr1	I	3683978	1122	0.243767	3.11327	1.0706	8.49231	1.21374	10.5224	GTTTTCTCAGGAGACCGATTCTATGACTCCTGAG
SPAC15A10.04c	zpr1	I	3684815	285	0.244	3.11327	1.07162	8.49231	1.21374	10.5124	TACTTTCCATGTTGAGGATAAGGAAGATTTAAAT
SPAC15A10.04c	zpr1	I	3684271	829	0.244	3.11327	1.07162	8.49231	1.21374	10.5124	TTGCTTGATATTCCCCATTTCAAAGAAGTTATTA
SPAC15A10.04c	zpr1	I	3684263	837	0.244	3.11327	1.07162	8.49231	1.21374	10.5124	TATTCCCCATTTCAAAGAAGTTATTATCATGTCT
SPAC15A10.06	NA	I	3690134	755	0.244	8.56148	9.97443	137.824	1.33961	26.1927	TCATAACTGCGCTTTTGCTAAAGTATTCTTATTT
SPAC15A10.06	NA	I	3689766	387	0.244	4.6699	9.97443	75.1765	1.33961	14.2869	TCTAACATTTGCCTTTGCTGGTACCTTTATATCT
SPAC15A10.06	NA	I	3690342	963	0.244	3.89158	9.97443	62.6471	1.33961	11.9058	TGTTTTTCGGGTTCTTGCGCAACTCTCGGAAAAC
SPAC15A10.06	NA	I	3690220	841	0.244	6.22653	9.97443	100.235	1.33961	19.0492	TCCTACTTTTTTTCAAACGGCTGCCACATGTCAG
SPAC15A10.06	NA	I	3690247	868	0.244	5.44822	9.97443	87.7059	1.33961	16.6681	ATGTCAGGCGTAGTTTCCTTATTGTTTTGTGGAA
SPAC15A10.09c	pun1	I	3695590	437	0.244	4.6699	8.76594	25.8806	1.72043	11.1245	TCAACCCCCTTACAATGCTGGAAACCAGTATTAA
SPAC15A10.09c	pun1	I	3695568	459	0.244	4.6699	8.76594	25.8806	1.72043	11.1245	AACCAGTATTAATAATGCAACTGGTAGCCAAATT
SPAC15E1.08	naa10	I	3729996	104	0.243767	3.89158	0.585526	7.92285	0.753827	21.1777	ATTACCTTTATCATGCTATTTCTTGGCCTATGCT
SPAC15E1.08	naa10	I	3730521	314	0.243767	3.11327	0.585526	6.33828	0.753827	16.9422	TCGAAGTTTATGGCGCCAAATATATGAGTCTTCA
SPAC15E1.08	naa10	I	3730530	323	0.243767	3.11327	0.585526	6.33828	0.753827	16.9422	ATGGCGCCAAATATATGAGTCTTCATGTTCGTAA
SPAC15E1.08	naa10	I	3730019	127	0.244	3.11327	0.586086	6.33828	0.753827	16.926	TGGCCTATGCTTTCTTATGTTGCTACTGATCCGA
SPAC15E1.08	naa10	I	3730988	531	0.244	3.11327	0.586086	6.33828	0.753827	16.926
SPAC15F9.03c	nxt2	I	2401309	151	0.731301	10.1181	0.940978	18.3878	1.00877	13.7155	ACTAAAGCCATTGTGGAAAAACTTGTTAGCCTGC
SPAC16.02c	srp2	I	4425774	572	0.243767	3.11327	0.329235	5.25359	0.72017	17.734	CACGTTCTCCACCTGCTCGCCGTCGTTATCGTGA
SPAC16.02c	srp2	I	4425708	638	0.243767	3.11327	0.329235	5.25359	0.72017	17.734	ACGCTTATCGTCCCGGCAGAGATGATGAACGTCG
SPAC1635.01	NA	I	4649576	319	0.243767	4.6699	0.571332	10.5248	1.36229	14.0625	AGCCCTGCAACTGCCGCCAAGACTGCTATTCTCA
SPAC1635.01	NA	I	4649364	107	0.244	4.6699	0.571878	10.5248	1.36229	14.0491	GCACTACCGCTCCCAACGGAGTCGTCTTCAATGT
SPAC1635.01	NA	I	4649586	329	0.243767	3.89158	0.571332	8.77066	1.36229	11.7188	CTGCCGCCAAGACTGCTATTCTCAATTTGGAGCA
SPAC1639.01c	NA	I	252408	468	0.244	3.89158	2.6676	36.3576	1.10868	14.3856	ATTTTTATACTACTGTGCTTATATTTCAAAATTC
SPAC1639.01c	NA	I	252651	225	0.244	3.11327	2.6676	29.0861	1.10868	11.5085	GTCCGCCCCGGTCGTTGCAACCATCATCATATCT
SPAC167.01	ire1	I	1561719	1014	0.243767	11.6748	15.184	402.375	0.773827	61.8911	TTTTGATTCGAAACTTGCGCTTTCATCATATGAC
SPAC167.01	ire1	I	1561854	879	0.244	3.89158	15.1985	134.125	0.773827	20.6107	ATCGTTTGTTGATATTGCTAGAACGGAATATTTC
SPAC167.01	ire1	I	1562559	174	0.243767	3.89158	15.184	134.125	0.773827	20.6304	TTCACCTACTGCTGATTCACCTTCCTCTGTGGAT
SPAC167.01	ire1	I	1562593	140	0.243767	3.11327	15.184	107.3	0.773827	16.5043	CCAATGGTAAAGCAAACAATGAATTAGCTCTTTT
SPAC167.04	pam17	I	1554641	185	0.243767	3.11327	2.64706	27.3913	0.670168	19.0572	ATTTAAATTGGCCCACATTCCTGAAATTAAGAAA
SPAC167.04	pam17	I	1554503	323	0.243767	3.11327	2.64706	27.3913	0.670168	19.0572	CTATTATGGGTCTTGATCTATTTACTCTATATGT
SPAC1687.01	rpc19	I	903432	211	0.243767	7.00485	1.17757	27.216	0.686053	41.8857	TCCATCCCACATCCATCTGAAGCAAAAATGAATT
SPAC1687.02	NA	I	904389	124	0.731301	18.6796	32.2105	343.579	0.703219	36.3229	GTTATTACGGCACGTTGCATAAGTGTCTTATTAG
SPAC1687.03c	rfc4	I	905959	197	0.243767	4.6699	3.00877	55.125	0.567904	33.7332	GAATGCCTGGTATCGGAAAAACGACGTCTATTCT
SPAC1687.06c	rpl44	I	911669	8	0.243767	8.56148	0.0562891	3.46963	1.00581	34.9188
SPAC1687.16c	erg31	I	933458	495	0.244	20.2362	1.71837	37.1487	1.90461	43.5446	TCCATATGCATCCCATGCTTTCAAATCCGCTGAT
SPAC1687.16c	erg31	I	933467	486	0.487534	25.6845	3.43346	47.1503	1.90461	27.6605	TATCTGCACTCCATATGCATCCCATGCTTTCAAA
SPAC1687.16c	erg31	I	933508	445	0.243767	7.00485	1.71673	12.8592	1.90461	15.0875	TATGTATACCCTCGTCTTCACAAACTCCATCATA
SPAC1687.16c	erg31	I	933327	626	0.731301	18.6796	5.15019	34.2911	1.90461	13.4111	CCATCATGATTCACGATGGTAAATACATCTCCAA
SPAC1687.16c	erg31	I	933300	653	0.243767	4.6699	1.71673	8.57278	1.90461	10.0584	TCTCCAACAACCCCATCATCAATGGTGCTGCTCA
SPAC1687.16c	erg31	I	933370	583	0.244	4.6699	1.71837	8.57278	1.90461	10.0487	AAGTTGACCTACTTGGCTCTTTTCACCTTTGTCA
SPAC16A10.06c	nse2	I	3090172	277	0.244	3.11327	3.34986	30.12	0.812191	15.7097	ACCAGTGAAAATATAAGTGATTTTGAAAATAAAA
SPAC16A10.06c	nse2	I	3089744	590	0.244	3.11327	3.34986	30.12	0.812191	15.7097	CGACAGCCTGTAATCATTTTTATGAAAAAGATGC
SPAC16C9.02c	NA	I	793495	215	0.243767	3.11327	0.963504	15.2099	0.71324	17.9063	CACCTACAGAAGTTCCATCTCGAGCAAATATCGC
SPAC16C9.03	nmd3	I	795276	193	0.243767	3.89158	2.83523	41.3536	0.794839	20.085	AACCATTGTCGTGAATGTGAACGATACATGCAAC
SPAC16C9.03	nmd3	I	795428	345	0.244	3.11327	2.83794	33.0829	0.794839	16.0527	ACCACATTCCCGACGAATTAAAGTCAAATTAACG
SPAC16E8.01	shd1	I	3499936	742	0.244	3.11327	5.37415	54.6538	0.580289	21.9878	CCTCCAACACTTCCACCCCAATCTACTAATACTT
SPAC16E8.01	shd1	I	3500066	872	0.244	3.11327	5.37415	54.6538	0.580289	21.9878	CAACTAATGCGTCTACTAGATCTACTGGCACTTC
SPAC16E8.06c	nop12	I	3509534	427	0.243767	3.11327	2.38156	21.7686	0.659619	19.3619	GAACGGACATCTCAGGAAGATGTTAAATCAGAAC
SPAC16E8.15	tif45	I	3528292	134	0.244	3.11327	0.579919	8.90847	0.585868	21.7784	TTGCTAGACCATGGACTTTGTGGTTTTTAATGCC
SPAC16E8.15	tif45	I	3528491	265	0.244	3.11327	0.579919	8.90847	0.585868	21.7784	GCATCTAGCTTGCCTATTAAGTCTGATTATTCTT
SPAC16E8.15	tif45	I	3528516	290	0.244	3.11327	0.579919	8.90847	0.585868	21.7784	ATTATTCTTTTTTCCGTGAAGGAGTTCGTCCAGA
SPAC1705.03c	ecm33	I	1570170	1089	0.975068	19.4579	0.697521	14.1043	0.891118	22.3937	GTCTTCCACTGTCTCTGCTACTAGTGGATCTGCC
SPAC1705.03c	ecm33	I	1570317	942	0.243767	4.6699	0.17438	3.38503	0.891118	21.498	GAGTGATGTGAAGGGTGCTCTCACTGTCGAGACT
SPAC1705.03c	ecm33	I	1570512	747	0.975068	16.3447	0.697521	11.8476	0.891118	18.8107	AATCGGACAAAGTTTTGCTGTTTTGTACTCTCCT
SPAC1705.03c	ecm33	I	1570186	1073	0.243767	4.6699	0.17438	3.38503	0.891118	21.498	CTAGTTCTTATGATTTGTCTTCCACTGTCTCTGC
SPAC1705.03c	ecm33	I	1570840	419	0.243767	3.89158	0.17438	2.82086	0.891118	17.915	GTCTTTCCGATTCTGATAGTGTCGTAATTGATGA
SPAC1705.03c	ecm33	I	1570762	497	0.731301	10.8964	0.523141	7.8984	0.891118	16.7206	CTACTTTCCAAGTAACCAACAATCGTTATATTCA
SPAC1705.03c	ecm33	I	1570556	703	2.1939	29.576	1.56942	21.4385	0.891118	15.1282	TCTAACACTACTCTGGATAACATTTCGGTTCCTT
SPAC1705.03c	ecm33	I	1571056	203	0.487534	6.22653	0.34876	4.51337	0.891118	14.332	CTGTTAATGGAATTGAGTCCGTTCAAGGTGATGT
SPAC1705.03c	ecm33	I	1570738	521	0.243767	3.11327	0.17438	2.25668	0.891118	14.332	GTTATATTCAGGAGATCACCATGGAGGGCCTCGA
SPAC1705.03c	ecm33	I	1570734	525	0.243767	3.11327	0.17438	2.25668	0.891118	14.332	TATTCAGGAGATCACCATGGAGGGCCTCGAAAGT
SPAC1705.03c	ecm33	I	1571242	17	0.244	3.11327	0.174547	2.25668	0.891118	14.3183	TGTTGTTCAAATCATTCGCTCTCACTCTTCTTTT
SPAC1705.03c	ecm33	I	1571053	206	0.244	3.11327	0.174547	2.25668	0.891118	14.3183	TTAATGGAATTGAGTCCGTTCAAGGTGATGTTGT
SPAC1705.03c	ecm33	I	1570751	508	0.244	3.11327	0.174547	2.25668	0.891118	14.3183	GTAACCAACAATCGTTATATTCAGGAGATCACCA
SPAC1705.03c	ecm33	I	1570088	1171	0.244	3.11327	0.174547	2.25668	0.891118	14.3183	TCTGCATCTTCCTCTTCCTCTTCCTCCCATGAAA
SPAC1751.03	NA	I	387390	813	0.244	3.89158	0.856444	14.5312	0.848623	18.7941	TGCTCATTGCCAACACCAAAAATTTGATGAAGAT
SPAC1751.03	NA	I	386586	180	0.243767	3.11327	0.855626	11.625	0.848623	15.0496	GTTTCTGACTCGCTTGCCATTGTTGGCACAAGCA
SPAC1751.03	NA	I	386920	343	0.243767	3.11327	0.855626	11.625	0.848623	15.0496	ACTCCTGCCATACTCAGTGTCTTAAGCATTTTAT
SPAC1751.03	NA	I	387263	686	0.243767	3.11327	0.855626	11.625	0.848623	15.0496	ACTTTTTCTTTGATGATATTGTCACCCTTCCACC
SPAC1782.02c	NA	I	4760512	273	0.487534	21.0146	4.58491	90.4966	0.992003	43.4512	AATTACTCCAATTCGTGCTATATTTGACTTTATC
SPAC1782.02c	NA	I	4760611	174	0.243767	5.44822	2.29245	23.4621	0.992003	22.5303	CAACTTATCGACTCTTGCATTGTCCGGCTTGGTA
SPAC1782.07	qcr8	I	4767482	139	0.243767	3.11327	0.465776	5.4439	0.986922	12.9407	TTCAAAACTTCTACGCAAAATATGTTTCGTCGCG
SPAC1782.07	qcr8	I	4767452	109	0.731301	9.3398	1.39733	16.3317	0.986922	12.9407	CCATTTCAACAGAGACCAATGGCCGGCTTCTTCA
SPAC1782.10c	nhp2	I	4772977	168	0.243767	3.11327	0.587863	6.88889	0.657502	19.4243	GAAACACATCCTTCGTGGGGTCAAAGAGGTTGTA
SPAC1782.10c	nhp2	I	4772894	251	0.487534	6.22653	1.17573	13.7778	0.657502	19.4243	TTTCTCCCATGGATGTTATATCTCATATTCCAGT
SPAC1782.11	met14	I	4773902	111	0.244	3.11327	0.257425	5.52381	0.661839	19.2785	ATTATCTGCGTCTGGAAAGTCTACAATCGCTTGT
SPAC1782.11	met14	I	4774216	425	0.244	3.11327	0.257425	5.52381	0.661839	19.2785	TTGCCGAGCAGCGTGATCCAAAGGGTTTGTACAA
SPAC1783.02c	vps66	I	2189962	507	0.244	4.6699	8.3691	74.2192	1.13996	16.7891	TGATGCTAAACCTCTTGCTAAAGTTGCTGCAAAG
SPAC1783.07c	pap1	I	2201704	542	0.244	3.11327	5.42675	50.6565	1.18023	10.8108	TATCTCCTCAATCTAATCTTCACCTTTCTCCTAA
SPAC1783.08c	rpl1502	I	2204166	179	0.243767	3.89158	0.118684	2.68379	0.926607	17.2288	CCAAGCAAGGATATGTTATTTATCGTATTCGTGT
SPAC1783.08c	rpl1502	I	2203792	553	0.244	3.11327	0.118797	2.14703	0.926607	13.7699	TATAACAACTCCCCTCAACATGCCACCTGGCTCC
SPAC1786.01c	ptl2	I	3029419	754	0.244	7.00485	1.96353	93.0984	0.971013	29.5654	GGAAGAACGGCCCTTTGCCTATCAGGTGGTGCTT
SPAC1786.01c	ptl2	I	3029146	1027	0.487534	5.44822	3.92332	72.4098	0.971013	11.5086	TTATGGGCAAAAACTTGCATGTATTTTACTCGTG
SPAC1786.01c	ptl2	I	3029645	528	0.487534	9.3398	3.92332	124.131	0.971013	19.7291	ACAGAAAGATTGGAATGCCCTCAAATCTGTACTT
SPAC1786.01c	ptl2	I	3029840	333	0.244	4.6699	1.96353	62.0656	0.971013	19.7103	TATTGTTTGGAGAGGCGAAGCTCGCAGACTTCGT
SPAC1786.01c	ptl2	I	3029833	340	0.244	3.11327	1.96353	41.377	0.971013	13.1402	TGGAGAGGCGAAGCTCGCAGACTTCGTAAACTCT
SPAC1786.02	NA	I	3034913	32	0.487534	14.0097	2.43703	20.0981	1.50675	19.0714	TCTATTTCCTGGCCTTGCTCCTGGCCACTGCTGT
SPAC1786.02	NA	I	3036495	1614	2.68144	117.526	13.4037	168.601	1.50675	29.0886	TCATCGCTATCGTATTGCAAACAGCGAGATTCAA
SPAC1786.02	NA	I	3036186	1305	3.90027	126.087	19.4962	180.883	1.50675	21.4553	GCTTGATGTCGTATTTGCCTTCGACTCAAGTGGA
SPAC1786.02	NA	I	3036060	1179	6.82548	175.9	34.1184	252.343	1.50675	17.1037	TGATATTGCTGGTAATGCTACTGCCGTCTCTGAA
SPAC1786.02	NA	I	3035022	141	0.487534	10.1181	2.43703	14.5153	1.50675	13.7738	CACCAATGCTTCGTATGCCCCTGTGATCCGTTCT
SPAC1786.02	NA	I	3035640	759	0.244	4.6699	1.21968	6.69937	1.50675	12.7021	CTCGTCTGTTCAAAATGCCTCCTGGTTCCAAACT
SPAC1786.02	NA	I	3035577	696	0.243767	3.89158	1.21851	5.5828	1.50675	10.5952	TTGGGGACGTGCCATTGCTCGTCACTTTGTCGGA
SPAC1786.02	NA	I	3036051	1170	0.243767	3.89158	1.21851	5.5828	1.50675	10.5952	TGATGCTACTGATATTGCTGGTAATGCTACTGCC
SPAC1786.02	NA	I	3036598	1717	0.244	13.2314	1.21968	18.9815	1.50675	35.9893	TGTGCCGTCGTCCAACGCTCTTTGGAACGTCGCA
SPAC1786.02	NA	I	3036172	1291	2.68144	116.748	13.4037	167.484	1.50675	28.896	CAACCCGAGCGTAAGCTTGATGTCGTATTTGCCT
SPAC1786.02	NA	I	3035918	1037	0.243767	7.00485	1.21851	10.049	1.50675	19.0714	CCTCTACTCGTTACAACGAGGCTTTAATCGATGT
SPAC1786.02	NA	I	3034911	30	0.244	7.00485	1.21968	10.049	1.50675	19.0531	TTTCTATTTCCTGGCCTTGCTCCTGGCCACTGCT
SPAC1786.02	NA	I	3036044	1163	0.487534	10.1181	2.43703	14.5153	1.50675	13.7738	CCTATACTGATGCTACTGATATTGCTGGTAATGC
SPAC1786.02	NA	I	3036042	1161	0.244	4.6699	1.21968	6.69937	1.50675	12.7021	CCCCTATACTGATGCTACTGATATTGCTGGTAAT
SPAC1786.02	NA	I	3034885	4	0.243767	3.89158	1.21851	5.5828	1.50675	10.5952
SPAC1786.02	NA	I	3035273	392	0.243767	3.89158	1.21851	5.5828	1.50675	10.5952	TGCTTTTCGGTGGTGGTGCCTTGGCTGCTTTGGA
SPAC1786.02	NA	I	3035423	542	0.244	3.89158	1.21968	5.5828	1.50675	10.5851	TCCAAAACATCTCCAAGTCCATTTGGTACACCCG
SPAC1786.02	NA	I	3035890	1009	0.244	3.89158	1.21968	5.5828	1.50675	10.5851	GACAATGTTGGCTTCTTGGTCGGTACCTCCTCTA
SPAC1786.02	NA	I	3035891	1010	0.244	3.89158	1.21968	5.5828	1.50675	10.5851	ACAATGTTGGCTTCTTGGTCGGTACCTCCTCTAC
SPAC1786.02	NA	I	3035930	1049	0.244	3.89158	1.21968	5.5828	1.50675	10.5851	ACAACGAGGCTTTAATCGATGTCAGTTTGCGTCA
SPAC1786.02	NA	I	3036032	1151	0.244	3.89158	1.21968	5.5828	1.50675	10.5851	TCTACCCCAACCCCTATACTGATGCTACTGATAT
SPAC1786.02	NA	I	3036056	1175	0.244	3.89158	1.21968	5.5828	1.50675	10.5851	CTACTGATATTGCTGGTAATGCTACTGCCGTCTC
SPAC1786.02	NA	I	3036115	1234	0.244	3.89158	1.21968	5.5828	1.50675	10.5851	TTGGACTTGTTTGATGGTGGCTATGACGGCCAAA
SPAC1786.02	NA	I	3036171	1290	0.244	3.89158	1.21968	5.5828	1.50675	10.5851	TCAACCCGAGCGTAAGCTTGATGTCGTATTTGCC
SPAC1786.02	NA	I	3036455	1574	0.244	3.89158	1.21968	5.5828	1.50675	10.5851	TGCCCAACACTCCTTGGACAATGAAATCCAACCT
SPAC1786.03	cut11	I	3037998	239	0.487534	17.123	12.1208	195.724	1.25007	28.0956	TTCCCTATTTTGTAATGCTTAAAAGTCGGATGTC
SPAC1786.03	cut11	I	3038176	417	0.487534	14.0097	12.1208	160.138	1.25007	22.9873	TCGGCTGCAGTGGATTGCTTCACCAAACGCGTAC
SPAC17A2.02c	NA	I	3553607	131	0.731301	10.1181	4.30049	25.911	1.17654	11.7597	ACATGCATGTTATTTTGCTGAGCGCTTTGTTTTA
SPAC17A2.02c	NA	I	3553458	280	0.244	3.11327	1.43487	7.9726	1.17654	10.8448	AGTATTGTCTTGATTTGCCTTGGGTATACTTGCT
SPAC17A2.02c	NA	I	3552946	792	0.487534	7.00485	2.867	17.9384	1.17654	12.212	TTCCAAAATGATTGATGCTATTCGTCGTCGCGCT
SPAC17A2.02c	NA	I	3553566	172	0.244	6.22653	1.43487	15.9452	1.17654	21.6895	ATAAACATCCTTTCGCCAGTTATCTCTAGACATT
SPAC17A2.02c	NA	I	3553556	182	0.244	4.6699	1.43487	11.9589	1.17654	16.2672	TTTCGCCAGTTATCTCTAGACATTTGAGTACCCA
SPAC17A2.02c	NA	I	3553499	239	0.731301	12.4531	4.30049	31.8904	1.17654	14.4735	CTCGGTTGAATTGGGACGCCCACGTTGTCAGTTC
SPAC17A2.02c	NA	I	3553103	635	0.243767	3.11327	1.4335	7.9726	1.17654	10.8551	TTGTGACCTTCATCTGCGTACGTATCGCTTGGGG
SPAC17A2.02c	NA	I	3553521	217	1.21884	15.5663	7.16749	39.863	1.17654	10.8551	TATGCCAAGTTATCGAAGAAGACTCGGTTGAATT
SPAC17A2.02c	NA	I	3553305	433	0.244	3.11327	1.43487	7.9726	1.17654	10.8448	CACATTACTGGTATTGGATTTGTCATTCATGCCA
SPAC17A2.02c	NA	I	3553553	185	0.975068	11.6748	5.73399	29.8973	1.17654	10.1767	CGCCAGTTATCTCTAGACATTTGAGTACCCATTA
SPAC17A2.13c	rad25	I	3583258	803	0.244	4.6699	0.46422	8.90146	1.00598	19.0252
SPAC17A2.13c	rad25	I	3583588	473	0.243767	3.11327	0.463776	5.93431	1.00598	12.6956	ACAAGGCAGCTTCTGACATTGCTGTTGCTGAGTT
SPAC17A5.03	rpl301	I	1756254	146	0.243767	7.00485	0.176845	6.73269	0.853451	33.6702	CCGCTTTCCTCGGTTATAAGGCTGGTATGACTCA
SPAC17A5.08	erp2	I	1768196	410	2.9252	116.748	33.9107	202.452	1.39442	28.6219	ACAAAAAGGACAGCATGCAAAGTACTGTTTTAGA
SPAC17A5.08	erp2	I	1768002	216	0.243767	8.56148	2.82589	14.8465	1.39442	25.1873	ATCTCAGAAGACCGTTGCACTTGGCAAAAAGAGA
SPAC17A5.08	erp2	I	1768050	264	0.243767	6.22653	2.82589	10.7974	1.39442	18.318	ATTTTTCACCCTCGAAGAAAAGGGTGAATATGAA
SPAC17A5.08	erp2	I	1768154	368	0.243767	5.44822	2.82589	9.44776	1.39442	16.0283	AACTTTCTCTTCCTGCATTAACCCGTGATGAAGC
SPAC17A5.08	erp2	I	1768150	364	0.244	5.44822	2.82859	9.44776	1.39442	16.013	AATGAACTTTCTCTTCCTGCATTAACCCGTGATG
SPAC17A5.08	erp2	I	1767974	188	0.244	4.6699	2.82859	8.09808	1.39442	13.7254	TTGATGTCGATTATATGATCAAGGCACCATCTCA
SPAC17A5.08	erp2	I	1768137	351	0.243767	3.89158	2.82589	6.7484	1.39442	11.4488	AATCACTATGGAAAATGAACTTTCTCTTCCTGCA
SPAC17A5.08	erp2	I	1768010	224	0.244	3.89158	2.82859	6.7484	1.39442	11.4378	AGACCGTTGCACTTGGCAAAAAGAGAAGACAGGC
SPAC17A5.08	erp2	I	1768051	265	0.244	3.89158	2.82859	6.7484	1.39442	11.4378	TTTTTCACCCTCGAAGAAAAGGGTGAATATGAAT
SPAC17A5.08	erp2	I	1768181	395	0.244	3.89158	2.82859	6.7484	1.39442	11.4378	ATGAAGCCAAAGACTACAAAAAGGACAGCATGCA
SPAC17A5.15c	gus1	I	1784422	662	0.243767	7.00485	0.43622	12.9232	0.881069	32.6148	GTGGATATTTGCACATTGGACACGCAAAGGCCGC
SPAC17A5.15c	gus1	I	1784405	679	0.243767	4.6699	0.43622	8.61549	0.881069	21.7432	GGACACGCAAAGGCCGCACTTTTAAATCAATATT
SPAC17A5.15c	gus1	I	1783964	1120	0.244	3.89158	0.436637	7.17957	0.881069	18.102	AATTTATTACCTCACCATCGTACTGGGACCAAGT
SPAC17A5.15c	gus1	I	1783855	1229	0.243767	3.11327	0.43622	5.74366	0.881069	14.4954	CTACTGAGTACCGTGATCGCAATCCCTTATATCA
SPAC17A5.15c	gus1	I	1783546	1538	0.243767	3.11327	0.43622	5.74366	0.881069	14.4954	TCATTGATCCCGTTGCTCCACGCCATACAGCTGT
SPAC17A5.15c	gus1	I	1784917	167	0.244	3.11327	0.436637	5.74366	0.881069	14.4816	CCATTCAGCTTAACGGCTCTGATTCTCCTGTATT
SPAC17A5.15c	gus1	I	1784680	404	0.244	3.11327	0.436637	5.74366	0.881069	14.4816	CCTCTGCTGATTTTTCTATTTGGGGTGCCTTAAA
SPAC17A5.15c	gus1	I	1784596	488	0.244	3.11327	0.436637	5.74366	0.881069	14.4816	TTGCTCGTTGGTACAAGTTTATGGATTCTCAAAA
SPAC17A5.15c	gus1	I	1784296	788	0.244	3.11327	0.436637	5.74366	0.881069	14.4816	AAGACGCCATTTTGGAGGATGTCGCCTTACTCGG
SPAC17A5.15c	gus1	I	1783768	1316	0.244	3.11327	0.436637	5.74366	0.881069	14.4816	GTATGAACTTTGTACGTACATTGTTAAGTAAGCG
SPAC17C9.03	tif471	I	4495587	716	0.243767	4.6699	1.06176	18.5824	0.651765	29.3928	CCACGAGTGCATCCAACACCAATACCTCTCCTGC
SPAC17C9.03	tif471	I	4493839	2464	0.243767	3.89158	1.06176	15.4853	0.651765	24.494	CCATCTACTGAGGAAGCCTTAAAAGCTGGTAAAT
SPAC17C9.03	tif471	I	4495570	733	0.244	3.89158	1.06277	15.4853	0.651765	24.4707	ACCAATACCTCTCCTGCTAATGGCGCACCGACTA
SPAC17C9.03	tif471	I	4494922	1381	0.243767	3.11327	1.06176	12.3882	0.651765	19.5952	TCTACACTTAGCCCCAGAAATGGATTTGCCCCTA
SPAC17C9.03	tif471	I	4493329	2974	0.243767	3.11327	1.06176	12.3882	0.651765	19.5952	CTTACTGAAAAACCTGCTGAAACTAAGGGTGAGG
SPAC17C9.03	tif471	I	4495437	866	0.244	3.11327	1.06277	12.3882	0.651765	19.5765	CAAACACATCTTCTAGATCTAATCGTCAAAATCA
SPAC17C9.03	tif471	I	4495431	872	0.244	3.11327	1.06277	12.3882	0.651765	19.5765	CATCTTCTAGATCTAATCGTCAAAATCACGGAAA
SPAC17C9.03	tif471	I	4493652	2651	0.244	3.11327	1.06277	12.3882	0.651765	19.5765	GATCCGGCTCAAATACTCACTCCCATGCTGGCCC
SPAC17C9.03	tif471	I	4492751	3552	0.244	3.11327	1.06277	12.3882	0.651765	19.5765	AACAGACCCAGAAGAAGAAGAGATTGAAAGTTTG
SPAC17C9.03	tif471	I	4492288	4015	0.244	3.11327	1.06277	12.3882	0.651765	19.5765	CACGGTCCCACAAGTTTGAGTTCAATGCTTAAAG
SPAC17C9.06	sam50	I	4489932	278	0.244	3.11327	9.10423	105.778	1.13811	11.211	TTCAAGAAACTACTGGGAATTTGATGGCATTCAA
SPAC17C9.07	alg8	I	4486809	1257	0.243767	3.89158	8.01064	87.5581	0.976945	16.3411	TACAGGTGCTTGGATTGCTATGTTATTAACTTTT
SPAC17C9.07	alg8	I	4487915	151	0.244	3.11327	8.01829	70.0465	0.976945	13.0604	TCGGAGTGGTACAAATCTTCGATTTCAGAATGGA
SPAC17C9.09c	tim13	I	4484170	93	0.244	3.89158	0.527977	6.23377	0.833319	19.1393	TCAGGAACTTGCTGTTGCTCAAGCTGGCGAATTG
SPAC17C9.09c	tim13	I	4484398	220	0.243767	4.6699	0.527473	7.48052	0.833319	22.9891	ATGGAACGCTATATGGATGCTTGGAACATTGTTT
SPAC17C9.09c	tim13	I	4484294	159	0.243767	3.11327	0.527473	4.98701	0.833319	15.326	ATGTATCCCGGAGCCTGGTTCCACATTCGATCCC
SPAC17C9.09c	tim13	I	4484453	275	0.244	3.11327	0.527977	4.98701	0.833319	15.3114
SPAC17C9.10	stm1	I	4482496	278	0.487534	12.4531	3.2	50.023	0.77324	33.0337	ACAGTACCCTACTTATGCAAATTTACTACTATCG
SPAC17C9.12	scs22	I	4478992	608	0.243767	4.6699	0.903955	10.3971	1.09857	17.4383	CTGCAGTTTCTCACCAGAAGCCCCATGAAGCCCC
SPAC17C9.12	scs22	I	4479035	565	0.243767	3.89158	0.903955	8.66426	1.09857	14.5319	CCATCTACAGCTACTACACAGCATACCCAGCTTC
SPAC17C9.12	scs22	I	4478981	619	0.244	3.89158	0.904819	8.66426	1.09857	14.518	CACCAGAAGCCCCATGAAGCCCCATCTACTGCCG
SPAC17C9.12	scs22	I	4479153	447	0.243767	3.11327	0.903955	6.93141	1.09857	11.6255	TATTCCTACTTCTGCCACTGACAATTATACCACA
SPAC17C9.12	scs22	I	4478996	604	0.975068	10.8964	3.61582	24.2599	1.09857	10.1723	ACATCTGCAGTTTCTCACCAGAAGCCCCATGAAG
SPAC17C9.13c	cut8	I	4478212	363	0.244	3.11327	1.62501	21.4694	0.874434	14.5915	TGCGCTTAATGATATGGTTCCTTGTTATTTACCT
SPAC17D4.01	pex7	I	4723024	7	0.975068	12.4531	16.2632	231.75	0.845849	15.099
SPAC17D4.03c	cis4	I	4727132	1925	0.244	4.6699	8.09228	81.9503	0.91658	20.8808	ATTCGGCGAAGAATTTGCTCTCTGTGACTGATCC
SPAC17D4.03c	cis4	I	4726917	2140	0.244	3.89158	8.09228	68.2919	0.91658	17.4007	TCAATCGCTGTACCAAATTTAAAACACATTTGTA
SPAC17G6.02c	tco1	I	3589165	783	0.244	3.11327	16.8264	121.875	0.840195	15.1861	TCCCTCTCTATATCCTGCTCTCGAGAGAAGCAAA
SPAC17G6.06	rps2401	I	3599107	5	0.243767	3.89158	0.105965	2.68212	0.816663	19.5483
SPAC17G6.09	sec62	I	3604669	578	0.244	7.00485	2.13157	12.6031	1.37584	20.8661	TTACTGCTGTCATCGTGCGCCCTGGCATTTGGCT
SPAC17G6.09	sec62	I	3604678	587	0.975068	27.2411	8.51813	49.0119	1.37584	20.3059	TCATCGTGCGCCCTGGCATTTGGCTATTCCCCAA
SPAC17G6.09	sec62	I	3604296	205	0.243767	6.22653	2.12953	11.2027	1.37584	18.5654	AAATACAAAGGGTTTCCAGAAATTTCAAGCCGTG
SPAC17G6.09	sec62	I	3604705	614	0.244	6.22653	2.13157	11.2027	1.37584	18.5477	TCCCCAATCTTCTTGCCGACGTTGGCTTCTGTGA
SPAC17G6.09	sec62	I	3604601	510	0.243767	5.44822	2.12953	9.80238	1.37584	16.2447	TATGGGAGGCCTTGGAGTAATCGGTCTATTCTTT
SPAC17G6.09	sec62	I	3604593	502	0.244	5.44822	2.13157	9.80238	1.37584	16.2292	TATTTAAGTATGGGAGGCCTTGGAGTAATCGGTC
SPAC17G6.09	sec62	I	3604651	560	0.244	5.44822	2.13157	9.80238	1.37584	16.2292	GTTTTTTCTTATTTTGCATTACTGCTGTCATCGT
SPAC17G6.09	sec62	I	3604676	585	0.244	5.44822	2.13157	9.80238	1.37584	16.2292	TGTCATCGTGCGCCCTGGCATTTGGCTATTCCCC
SPAC17G6.09	sec62	I	3604371	280	0.243767	4.6699	2.12953	8.40204	1.37584	13.9241	ATGCTGGTTCGCGTTGATAAACTCCCCCCTAAAC
SPAC17G6.09	sec62	I	3604569	478	0.244	4.6699	2.13157	8.40204	1.37584	13.9108	ATGTTTATGCGCAAGGGTGCTTGGTATTTAAGTA
SPAC17G6.09	sec62	I	3604704	613	0.244	4.6699	2.13157	8.40204	1.37584	13.9108	TTCCCCAATCTTCTTGCCGACGTTGGCTTCTGTG
SPAC17G6.09	sec62	I	3604602	511	0.243767	3.89158	2.12953	7.0017	1.37584	11.6034	ATGGGAGGCCTTGGAGTAATCGGTCTATTCTTTG
SPAC17G6.11c	NA	I	3608428	1310	0.244	7.00485	3.5227	39.629	1.28028	22.4235	TTTACTTGGAAACCATGCCTGTCGTTTCTCAATC
SPAC17G6.11c	NA	I	3608158	1580	0.244	3.89158	3.5227	22.0161	1.28028	12.4575	AGTATACATGGACAATGCGTCAACCAGCTGTGGG
SPAC17G6.11c	NA	I	3607966	1772	0.244	3.89158	3.5227	22.0161	1.28028	12.4575	CTGATTCCAGTAGCGTGCTTGGTTGTGATCCTGA
SPAC17G6.11c	NA	I	3608780	958	0.244	27.2411	3.5227	154.113	1.28028	87.2025	ACCTGGAATAAATTATGCTTTAAGGGTGGTAGAA
SPAC17G6.11c	NA	I	3609045	693	0.244	7.78317	3.5227	44.0323	1.28028	24.915	TGATACCCCCGAAAGTGCTTATACGTTTGATTCT
SPAC17G6.11c	NA	I	3608250	1488	0.243767	7.00485	3.51934	39.629	1.28028	22.4449	TTGGCTTAGCGGTAATGCTTATCAAAAGTATGGT
SPAC17G6.11c	NA	I	3609015	723	0.244	3.89158	3.5227	22.0161	1.28028	12.4575	TTCTCAGGATTTAGGTACTCTGGATCTTGTTTTT
SPAC17G6.14c	uap56	I	3618641	203	0.244	6.22653	0.338933	9.7026	0.878482	29.0485	TTCGTGCAATTACGGACAGTGGGTTTGAGCACCC
SPAC17G6.14c	uap56	I	3618679	165	0.244	3.89158	0.338933	6.06413	0.878482	18.1553	TACGGGCTTTCGGGACTTTTTGTTAAAGCCCGAA
SPAC17G6.14c	uap56	I	3618447	397	0.243767	3.11327	0.338609	4.8513	0.878482	14.5381	ACTCGTGAACTTGCTTTTCAAATCAAAAATGAAT
SPAC17G6.14c	uap56	I	3617717	1127	0.243767	3.11327	0.338609	4.8513	0.878482	14.5381	ACATGCCTGATTCCCCTGATAGTTATCTTCATCG
SPAC17G6.14c	uap56	I	3618762	82	0.244	3.11327	0.338933	4.8513	0.878482	14.5242	GCTCAGGAGATCACTCCTGCTGCTGATACCGCAG
SPAC17G6.14c	uap56	I	3618190	654	0.244	3.11327	0.338933	4.8513	0.878482	14.5242	TGACATGCGTCGTGATATCCAAGAGGTTTTCCGC
SPAC17G6.14c	uap56	I	3618068	776	0.244	3.11327	0.338933	4.8513	0.878482	14.5242	CCTTGGAGATTTATGTGGACGATGAGACTAAGCT
SPAC17G6.15c	NA	I	3619860	555	0.244	4.6699	1.86884	28.087	0.751309	25.4741	CCCTTTTGCTGCTGTTGCTTCAGCTGGTGTTTTA
SPAC17G6.15c	NA	I	3619996	419	0.244	3.11327	1.86884	18.7246	0.751309	16.9827	TGACTCTTCCGCAGATGACTAAATCCTATATTTA
SPAC17G8.06c	NA	I	2352915	251	0.244	5.44822	0.342548	11.3529	0.765242	29.1787	ATGAAGGAAATCCTTGCAATATGCATTTACTTGA
SPAC17G8.06c	NA	I	2352720	446	0.243767	3.11327	0.342221	6.48736	0.765242	16.6895	AAGGTCAATGGTATGATGCCAACGTCTCTATTCC
SPAC17G8.06c	NA	I	2353104	62	0.244	3.11327	0.342548	6.48736	0.765242	16.6735	AAAGAGCTGCATTAAGCCTAAAAGGCTTTAAAAC
SPAC17G8.06c	NA	I	2352880	286	0.244	3.11327	0.342548	6.48736	0.765242	16.6735	CTCGGTCGACGAGTGAAAGAAGGTGTCAAAAAGG
SPAC17G8.06c	NA	I	2352526	640	0.244	3.11327	0.342548	6.48736	0.765242	16.6735	ATCACAGGAAAAATTGATGAGCCAACCCGTCATG
SPAC17G8.06c	NA	I	2352651	515	0.487534	5.44822	0.684441	11.3529	0.765242	14.6033	CTATGGGAAGATTCAACCGCCCTAGTATTATGGT
SPAC17G8.08c	NA	I	2355827	383	0.244	3.89158	1.38151	16	0.658684	24.2136	TTTTTGGAATTAAAATGCTTATGGAAGCGAAGGA
SPAC17G8.08c	NA	I	2355908	302	0.243767	7.00485	1.38019	28.8	0.658684	43.6262	TAGGAGTACTTCTTGGGCACGCCGCTCCATTACT
SPAC17G8.08c	NA	I	2356104	106	0.243767	3.89158	1.38019	16	0.658684	24.2368	TCAGCTATCAAACATCCAGAGGAAGTGCACCCAA
SPAC17G8.08c	NA	I	2355678	532	0.243767	3.11327	1.38019	12.8	0.658684	19.3894	ACTGGTCACAGGTCTCGCTCTGGACATACTTTAA
SPAC17G8.08c	NA	I	2356010	200	0.244	3.11327	1.38151	12.8	0.658684	19.3709	TAGGAGACAAGACTTTCATCGTAGCTGCTCTTTT
SPAC17G8.11c	imt3	I	2361429	83	1.4626	45.9207	30.6	302.34	0.983419	31.9259	TTGGAGGTCCAATGATGCTGTTCTTTATTAATTA
SPAC17G8.11c	imt3	I	2360642	870	0.487534	13.2314	10.2	87.1148	0.983419	27.597	TTTTATATTTGGCTATGCTTTGAAGCCTGCCGCT
SPAC17G8.11c	imt3	I	2361206	306	0.243767	4.6699	5.1	30.7464	0.983419	19.4802	CATGAGGGAGTTTATTGCTACTGATTATCCTTGG
SPAC17G8.11c	imt3	I	2360864	648	0.244	3.89158	5.10487	25.622	0.983419	16.218	GTCGATAATATGGAGTGCTTGGCGGAAGCTTCCA
SPAC17G8.11c	imt3	I	2361391	121	0.243767	6.22653	5.1	40.9952	0.983419	25.9736	ACAGACCTTCTTAAAGTTGATGACGTTTATAATC
SPAC17G8.11c	imt3	I	2360859	653	0.244	3.11327	5.10487	20.4976	0.983419	12.9744	TAATATGGAGTGCTTGGCGGAAGCTTCCAGATGC
SPAC17H9.10c	ddb1	I	2024308	133	0.243767	3.11327	7.59198	69.6	0.863028	14.7985	TATAGCTATGAAAATAATCGATTATGTTTAATAA
SPAC17H9.14c	NA	I	2029698	609	3.16897	149.437	9.5251	169.135	0.927472	50.8439	TAATGCAGACGTCTTTGCTGACATCGGAAGGCTA
SPAC17H9.14c	NA	I	2029965	342	0.244	7.78317	0.7334	8.80914	0.927472	34.3927	AGTTCAGTACTCCAATGCTCGCGACGTTGACAGT
SPAC17H9.14c	NA	I	2029488	819	0.244	7.00485	0.7334	7.92822	0.927472	30.9534	TTTCGATGAATTTGCTGCTGAGTTTTTGGATATG
SPAC17H9.14c	NA	I	2029491	816	3.90027	94.9546	11.7232	107.471	0.927472	26.2495	AACTTTCGATGAATTTGCTGCTGAGTTTTTGGAT
SPAC17H9.14c	NA	I	2030067	240	0.243767	3.11327	0.7327	3.52365	0.927472	13.7702	GATTGGCAAAATTGATGCGGATACACACTCCGAT
SPAC17H9.14c	NA	I	2030124	183	1.21884	59.9304	3.6635	67.8303	0.927472	53.0153	TTTAGCGCCAGTGTATGAAGAACTTGGCGCTCTT
SPAC17H9.14c	NA	I	2029767	540	0.243767	8.56148	0.7327	9.69005	0.927472	37.8681	TTTGGCTCCTACTTACGAAACTCTTGGCAAGGTA
SPAC17H9.14c	NA	I	2029754	553	0.244	5.44822	0.7334	6.16639	0.927472	24.0749	TACGAAACTCTTGGCAAGGTATTCAAAAACGAAC
SPAC17H9.14c	NA	I	2029806	501	0.243767	4.6699	0.7327	5.28548	0.927472	20.6553	AGTTGAATTTTATGCGGATTGGTGCGGTTATTGC
SPAC17H9.14c	NA	I	2029766	541	0.244	4.6699	0.7334	5.28548	0.927472	20.6356	TTGGCTCCTACTTACGAAACTCTTGGCAAGGTAT
SPAC17H9.14c	NA	I	2030164	143	0.487534	8.56148	1.4654	9.69005	0.927472	18.934	TGATTGAGTTTTACGCCACCTGGTGTGGACATTG
SPAC17H9.14c	NA	I	2029907	400	0.243767	3.89158	0.7327	4.40457	0.927472	17.2128	ACTGGTATCAAAAAACGCAAGATTGTCCTCCCTA
SPAC17H9.14c	NA	I	2029313	994	1.70637	27.2411	5.1289	30.832	0.927472	17.2128	TTGTCTAAACTTTTACGCCAGAAGAGCATCGCTT
SPAC17H9.14c	NA	I	2029779	528	0.244	3.89158	0.7334	4.40457	0.927472	17.1963	TTATTGCAAGCGTTTGGCTCCTACTTACGAAACT
SPAC17H9.14c	NA	I	2030224	83	0.243767	3.11327	0.7327	3.52365	0.927472	13.7702	TAGAGCTCCAAAGTCTCAATGAGTTGGAGAATAC
SPAC17H9.14c	NA	I	2029777	530	0.243767	3.11327	0.7327	3.52365	0.927472	13.7702	ATTGCAAGCGTTTGGCTCCTACTTACGAAACTCT
SPAC17H9.14c	NA	I	2029886	421	0.244	3.11327	0.7334	3.52365	0.927472	13.7571	ATTGTCCTCCCTAGCAATGTAGTTGAGCTCGATT
SPAC17H9.14c	NA	I	2029829	478	0.244	3.11327	0.7334	3.52365	0.927472	13.7571	ATGGACGATAAAAAAGATGTTTTAGTTGAATTTT
SPAC17H9.14c	NA	I	2029780	527	0.244	3.11327	0.7334	3.52365	0.927472	13.7571	GTTATTGCAAGCGTTTGGCTCCTACTTACGAAAC
SPAC17H9.14c	NA	I	2029765	542	0.244	3.11327	0.7334	3.52365	0.927472	13.7571	TGGCTCCTACTTACGAAACTCTTGGCAAGGTATT
SPAC17H9.14c	NA	I	2029756	551	1.95014	22.5712	5.8616	25.5465	0.927472	12.4793	CTTACGAAACTCTTGGCAAGGTATTCAAAAACGA
SPAC17H9.14c	NA	I	2029769	538	0.487534	5.44822	1.4654	6.16639	0.927472	12.0489	CGTTTGGCTCCTACTTACGAAACTCTTGGCAAGG
SPAC1805.06c	hem2	I	2784834	95	0.244	3.11327	1.35746	23.2941	0.991883	12.8637	TTACCAAGTCATCTCTAATGTATCCTATCTTCAT
SPAC1805.11c	rps2602	I	2793458	17	1.21884	26.4628	0.311419	9.08686	0.733416	29.6033	TGACTCAGAAGAGAAGAAATAACGGACGCAACAA
SPAC1805.12c	uep1	I	2794409	314	0.243767	7.78317	0.141447	7.57339	0.699229	45.6628	ATGCTCGTCTTCCTCCTCGTGCCACTAACTGCCG
SPAC1805.12c	uep1	I	2794356	367	0.243767	3.89158	0.141447	3.78669	0.699229	22.8314	ACCAACCAACTCCGTCCTAAGAAGAAGCTTAAGT
SPAC1805.12c	uep1	I	2794686	37	0.244	3.11327	0.141583	3.02935	0.699229	18.2477	TTGACTGGTAAAACTATAACCCTAGAGGTGGAAT
SPAC1805.12c	uep1	I	2794439	284	0.244	3.11327	0.141583	3.02935	0.699229	18.2477	ACTGTGAGAAGCAAATCTGCCGTAAATGCTATGC
SPAC1805.15c	pub2	I	2798086	1951	0.243767	3.11327	8.68966	106.105	0.787885	16.2098	CCGCCTTATAATTCCAAAGAAGAACTAGAACAAA
SPAC1834.02	aro1	I	4696465	2695	0.244	3.89158	1.13645	17.5278	0.852081	18.7178	TTGGATGAATTACTAGAAGACTATCTTGAGATGC
SPAC1834.02	aro1	I	4697837	4067	0.244	3.89158	1.13645	17.5278	0.852081	18.7178	CTATTCCCTATAAGTTGTCTGTTATGAAGTTCAT
SPAC1834.02	aro1	I	4695074	1304	0.243767	3.11327	1.13537	14.0223	0.852081	14.9886	GTACATGCCGTCTTACTAACATGCTTCACTCAGA
SPAC1834.02	aro1	I	4695549	1779	0.243767	3.11327	1.13537	14.0223	0.852081	14.9886	AAAATTAGTAGGCGGCAAGCCCATTTCTCAATTG
SPAC1834.02	aro1	I	4695919	2149	0.243767	3.11327	1.13537	14.0223	0.852081	14.9886	ATAGATATGGAAACCATGACTGATGCATTTTTAA
SPAC1834.02	aro1	I	4697025	3255	0.243767	3.11327	1.13537	14.0223	0.852081	14.9886	AATTGAAGTTCGTGTGGATTATTTGAAGGATCCC
SPAC1834.02	aro1	I	4696201	2431	0.244	3.11327	1.13645	14.0223	0.852081	14.9743	TCATTTAGCGTTTTGTCATTAATTTGTCCCTCTC
SPAC1834.02	aro1	I	4697153	3383	0.244	3.11327	1.13645	14.0223	0.852081	14.9743	GTACCATTTCGCAAGGTGGTTTATTCCCGAATGA
SPAC1834.02	aro1	I	4697339	3569	0.244	3.11327	1.13645	14.0223	0.852081	14.9743	CTGGTACTTGGTCATGGGCAAGACCTCACGAATG
SPAC1834.04	hht1	I	4700192	364	0.243767	3.11327	0.71979	8.22	1.04206	12.256	CGTGTTACGATTCAACCCAAGGATATGCAGTTGG
SPAC1834.05	alg9	I	4702727	140	0.731301	13.2314	14.6535	127.06	0.669247	27.0348	ACTATTGGGAGCCGTTGCATTATTTATTATACGG
SPAC1834.05	alg9	I	4703250	663	0.243767	6.22653	4.88451	59.7931	0.669247	38.1667	TAAGGCTATTTTTGTTGCTCTCCTTATAACCGGT
SPAC1834.05	alg9	I	4702772	185	0.243767	5.44822	4.88451	52.319	0.669247	33.3959	AAACATGGGAGTATTCTCCCGAATATGCCATCCG
SPAC1834.05	alg9	I	4702769	182	0.244	4.6699	4.88917	44.8448	0.669247	28.5977	TGCAAACATGGGAGTATTCTCCCGAATATGCCAT
SPAC1834.05	alg9	I	4702796	209	0.244	4.6699	4.88917	44.8448	0.669247	28.5977	ATGCCATCCGTAGTTGGTTTTACATAGCTTTGCA
SPAC1834.05	alg9	I	4702699	112	0.243767	3.11327	4.88451	29.8966	0.669247	19.0834	GTAATCGATGATTGTGACGAGGTATATAACTATT
SPAC1851.02	slc1	I	4500656	23	0.243767	3.11327	1.99052	18.0645	0.657817	19.415	TTATTAAGAGCACGCTGCTTGCTACTGTGACAGT
SPAC1851.02	slc1	I	4501100	404	0.244	3.11327	1.99242	18.0645	0.657817	19.3964	AGTCTCTAAGATATGTGCCCATTTTGGGATGGTT
SPAC1851.02	slc1	I	4500804	171	0.731301	12.4531	5.97156	72.2581	0.657817	25.8866	TATAGCCTCAGTTGTTGCACGTTTATGTGGTTAT
SPAC1851.02	slc1	I	4501233	537	0.244	3.89158	1.99242	22.5806	0.657817	24.2455	TTCTATTTGGGTATTTGCAGAAGGCACTCGTTCC
SPAC1851.02	slc1	I	4501167	471	0.244	3.11327	1.99242	18.0645	0.657817	19.3964	GTCTCGCCGAAGTGATGCGATTCAACTTTTTGCG
SPAC186.05c	NA	I	5540941	196	0.244	3.11327	13.3857	80.9231	0.843862	15.1201	TTTGGTTCATATTTGGCTCTTTTTTTTATGACTT
SPAC18B11.05	gpi18	I	309387	387	0.244	4.6699	26.3459	239.143	1.1226	17.0487	TTGGATTCGATGGGATGCTATCTATTTTGTTGAT
SPAC18B11.08c	NA	I	304845	206	0.243767	3.89158	0.811268	9.66443	0.761367	20.968	CTCCCAGCTCATCTCCGACTTCAATGGCTTTTAT
SPAC18B11.08c	NA	I	304855	216	0.243767	3.11327	0.811268	7.73154	0.761367	16.7744	ATCTCCGACTTCAATGGCTTTTATGGGTATCGCG
SPAC18G6.02c	chp1	I	2213009	849	0.244	3.11327	28.2917	226.118	0.79912	15.9667	TTCCGATAATGATGTTGCCAATTCATTATTTTTT
SPAC18G6.04c	shm2	I	2218444	208	0.243767	3.89158	1.91016	35.7805	0.745375	21.4179	ACTTCAAGAGCTGTGATGGATGCACTCGGAAGTA
SPAC18G6.09c	NA	I	2233820	266	0.244	3.11327	2.15573	20.0856	1.17612	10.8486	CTGGTCACAGTTCGTATGCTGGCTCTCGTATCTC
SPAC18G6.09c	NA	I	2233532	554	0.244	3.11327	2.15573	20.0856	1.17612	10.8486	CTCCCGTTTCCGAAAAGGCTGAATGGCAACCTCC
SPAC18G6.11c	rrn3	I	2238471	323	0.243767	4.6699	1.64986	24.8848	0.784044	24.4339	CGTGCAATGTTTCCAGATTGGATAGCTCTAATTC
SPAC18G6.11c	rrn3	I	2238079	715	0.243767	4.6699	1.64986	24.8848	0.784044	24.4339	TTGCATGCAATAATTGATAAAATTATCCAAATTG
SPAC18G6.11c	rrn3	I	2238336	458	0.244	3.89158	1.65144	20.7373	0.784044	20.3421	CTAATTACTTGCCGCTAGTTATGACTATGCTGAT
SPAC18G6.11c	rrn3	I	2238327	467	0.243767	3.11327	1.64986	16.5899	0.784044	16.2893	TGCCGCTAGTTATGACTATGCTGATTCAGCATAT
SPAC18G6.11c	rrn3	I	2238153	641	0.243767	3.11327	1.64986	16.5899	0.784044	16.2893	TTTTAGCACAGATGACTTATATTTCGAACGTTTT
SPAC18G6.11c	rrn3	I	2238023	771	0.243767	3.11327	1.64986	16.5899	0.784044	16.2893	TGATGATGATGATGAGGAGGAGGATGAAGTGGTA
SPAC18G6.11c	rrn3	I	2237991	803	0.243767	3.11327	1.64986	16.5899	0.784044	16.2893	TAACAGATGATGATGGAACTAGCAATGCCGATTC
SPAC18G6.11c	rrn3	I	2237911	883	0.244	3.11327	1.65144	16.5899	0.784044	16.2737	TCAAGTGAAATGACATCTAGCACAATATTGACTC
SPAC18G6.12c	NA	I	2239666	763	0.244	3.11327	10.0096	109.412	0.794334	16.0629	CGTGTCGCTTTTACATACCAGGATGAAAACTACT
SPAC18G6.14c	rps7	I	2242042	480	4.14404	45.1424	0.780755	9.37438	0.869874	12.5229	CCTTGACAACAGAGATGCTAACACTGTTGATTAT
SPAC1952.01	NA	I	4969257	885	0.244	3.89158	23.1731	165.811	1.10414	14.4449	CTTGCCTATTACTATTGCTCTTATTGGCCTGCAT
SPAC1952.03	otu2	I	4971469	353	0.244	3.11327	3.76808	39.3939	0.748356	17.0498	CGGCAGAAAAATCATCAGTTCAGTCCTCATTGAA
SPAC1952.10c	NA	I	4985407	771	0.244	14.788	32.9405	355.759	1.52765	39.673	GATGACCTGTAGGTATGCTGTTTACAGAGAAAAT
SPAC1952.14c	mrpl25	I	4994428	15	0.244	3.11327	5.15787	29.2	0.648404	19.678
SPAC19A8.04	erg5	I	2482015	94	1.21884	40.4725	3.39011	65.431	0.87516	37.9426	TCGAAATGGACAATTTGCTTCGCCCTTTTGGCTG
SPAC19A8.04	erg5	I	2481228	549	0.243767	12.4531	0.678022	20.1326	0.87516	58.3732	TAGTAAAGATGACTATGCTCAATATATGATTCCA
SPAC19A8.04	erg5	I	2480652	1125	0.975068	45.1424	2.71209	72.9807	0.87516	52.9007	GATGACTTATACCCGTGCCGTTGTTAAGGAATGT
SPAC19A8.04	erg5	I	2481312	465	1.21884	30.3544	3.39011	49.0732	0.87516	28.4569	TTTATTCACTACCCGTGCTCTTGCGTCTTATTTA
SPAC19A8.04	erg5	I	2481411	366	1.4626	32.6893	4.06813	52.8481	0.87516	25.5383	ACCCTGCGTTGTTGATGCTGGAAAGAAAATTCTA
SPAC19A8.04	erg5	I	2480970	807	0.487534	10.1181	1.35604	16.3577	0.87516	23.7141	CATGGAGGCTGGTAATGCCCCTGCTTGCATGATG
SPAC19A8.04	erg5	I	2481540	237	0.244	4.6699	0.67867	7.54973	0.87516	21.8691	TTTTGAGAAATACAATGCTAAATGGCAAACCGGA
SPAC19A8.04	erg5	I	2480793	984	0.731301	11.6748	2.03407	18.8743	0.87516	18.2416	AGACGCTACTTCTAGTGCTATGACTTGGCTCTTT
SPAC19A8.04	erg5	I	2481989	120	3.65651	42.8074	10.1703	69.2059	0.87516	13.3772	TTTGGCTGTCTGCATTGCTTATGATCAAATCTCG
SPAC19A8.04	erg5	I	2480808	969	0.243767	17.9013	0.678022	28.9406	0.87516	83.9115	TTTATTTGCTTCCCAAGACGCTACTTCTAGTGCT
SPAC19A8.04	erg5	I	2481470	307	0.243767	4.6699	0.678022	7.54973	0.87516	21.89	GTTATCGCTTCCGAACGCGATTTGGCCCGTAAGA
SPAC19A8.04	erg5	I	2480947	830	0.243767	4.6699	0.678022	7.54973	0.87516	21.89	CTTGCATGATGGAAGAATGGATTCATGAAATGAT
SPAC19A8.04	erg5	I	2480807	970	0.244	4.6699	0.67867	7.54973	0.87516	21.8691	TTATTTGCTTCCCAAGACGCTACTTCTAGTGCTA
SPAC19A8.04	erg5	I	2481532	245	0.243767	3.89158	0.678022	6.29144	0.87516	18.2416	AATACAATGCTAAATGGCAAACCGGACCCCTTTC
SPAC19A8.04	erg5	I	2480951	826	0.243767	3.89158	0.678022	6.29144	0.87516	18.2416	CCTGCTTGCATGATGGAAGAATGGATTCATGAAA
SPAC19A8.04	erg5	I	2481436	341	0.244	3.89158	0.67867	6.29144	0.87516	18.2242	TTTTAAATTCTCCAAGTTATGTTCAACCCTGCGT
SPAC19A8.04	erg5	I	2482104	5	0.243767	3.11327	0.678022	5.03315	0.87516	14.5933
SPAC19A8.04	erg5	I	2481560	217	0.243767	3.11327	0.678022	5.03315	0.87516	14.5933	TTGGATAGTATGAAACCAACTTTTGAGAAATACA
SPAC19A8.04	erg5	I	2481571	206	0.731301	9.3398	2.03407	15.0995	0.87516	14.5933	TGGGATCTTTCTTGGATAGTATGAAACCAACTTT
SPAC19A8.04	erg5	I	2481980	129	0.244	3.11327	0.67867	5.03315	0.87516	14.5794	CTGCATTGCTTATGATCAAATCTCGTATCAGATG
SPAC19A8.04	erg5	I	2481150	627	0.244	3.11327	0.67867	5.03315	0.87516	14.5794	TTACTATATCTCCGACGATGCTATTAAGCACATT
SPAC19A8.04	erg5	I	2480972	805	0.244	3.11327	0.67867	5.03315	0.87516	14.5794	AACATGGAGGCTGGTAATGCCCCTGCTTGCATGA
SPAC19A8.05c	sst4	I	2479331	1213	0.243767	3.11327	4.00218	39.8478	1.12251	11.3777	CAGCTACAGGAACTCCACGAAAATATGGGTGTTA
SPAC19A8.05c	sst4	I	2479323	1205	0.244	3.11327	4.00601	39.8478	1.12251	11.3668	CGGAATATCAGCTACAGGAACTCCACGAAAATAT
SPAC19A8.09	NA	I	2468076	155	0.244	12.4531	4.39705	65.6	0.8026	63.5898	TCAAAAGCCGAATTTTGCATTTAATTCGAGCTAT
SPAC19A8.09	NA	I	2468118	113	0.487534	13.2314	8.78571	69.7	0.8026	33.8143	CCCAAAGTGCTGCCCTGGGATTTGGTGATCGACA
SPAC19A8.15	trp2	I	2458681	1069	0.243767	4.6699	0.31877	6.99944	0.890082	21.523	CTCGATTATGCTAAGCGTTTAACTGAGTATTGTG
SPAC19A8.15	trp2	I	2459616	134	0.243767	3.89158	0.31877	5.83287	0.890082	17.9358	GTTTGCAAAATGGAGGAGCAGGAATAATTGAGCT
SPAC19A8.15	trp2	I	2457903	1847	0.244	3.89158	0.319075	5.83287	0.890082	17.9187	AATATACCAATCGCGCAGAGTTTATCGCTGTCAC
SPAC19A8.15	trp2	I	2459326	424	0.243767	3.11327	0.31877	4.6663	0.890082	14.3487	GCTGTCGGCTTTAGAGAAGAATGTAAAAAGCAAG
SPAC19A8.15	trp2	I	2459013	737	0.243767	3.11327	0.31877	4.6663	0.890082	14.3487	TCGATTTGATTTTGAAGGCAGAGCCTGGCACTGC
SPAC19A8.15	trp2	I	2458713	1037	0.243767	3.11327	0.31877	4.6663	0.890082	14.3487	CTTATTATGAGTATATGGGTCGTCCAAGTGCCCT
SPAC19A8.15	trp2	I	2459427	323	0.244	3.11327	0.319075	4.6663	0.890082	14.335	ACTACAATCCTATTTTCAGTTATGGAGATGCCAA
SPAC19A8.15	trp2	I	2458980	770	0.244	3.11327	0.319075	4.6663	0.890082	14.335	CTGCTACCGTGGTTGAGGAATATTGTAAATATCT
SPAC19A8.15	trp2	I	2459077	673	0.487534	5.44822	0.63754	8.16602	0.890082	12.5551	ACCAGTGAACATTTCCACCAAGTTGGCAGCGTGT
SPAC19B12.02c	gas1	I	4880006	446	1.21884	32.6893	1.6385	16.5381	1.01478	26.4295	CTCCCTATGATAACATGCTTGGTTTCATTGCTGG
SPAC19B12.02c	gas1	I	4879269	1183	0.243767	11.6748	0.327701	5.90645	1.01478	47.1955	CTCTTCAGCTATGTTTGCAATGAAATTTCTTGTG
SPAC19B12.02c	gas1	I	4879588	864	7.06924	238.165	9.50332	120.492	1.01478	33.1996	TTGGTCTGGTGGTATTGCTTACCAATATTTTGAG
SPAC19B12.02c	gas1	I	4879993	459	29.0083	839.804	38.9964	424.871	1.01478	28.5288	CATGCTTGGTTTCATTGCTGGAAACGAAGTTATT
SPAC19B12.02c	gas1	I	4879081	1371	1.21884	32.6893	1.6385	16.5381	1.01478	26.4295	TGCCACTGGTACTTGTGCTTCATACCTTTCTGCT
SPAC19B12.02c	gas1	I	4880161	291	0.243767	6.22653	0.327701	3.15011	1.01478	25.1709	GTCTCTTGATCACTCTGCTTGTATGCAAGCTTTT
SPAC19B12.02c	gas1	I	4879192	1260	1.70637	35.8026	2.2939	18.1131	1.01478	20.6761	TTACAGTTACTGTGATGCTAAGCAACAATTGGAT
SPAC19B12.02c	gas1	I	4879042	1410	4.63157	85.6148	6.22631	43.314	1.01478	18.2158	ATCTTCTGCCACCAATGCTATTTCTCTTACCGCT
SPAC19B12.02c	gas1	I	4879486	966	1.21884	20.2362	1.6385	10.2379	1.01478	16.3611	CCTTTCTTCCAGATATGCCTCTGTCATCCCTAGT
SPAC19B12.02c	gas1	I	4879468	984	5.36288	68.4919	7.20941	34.6512	1.01478	12.5855	CTCTGTCATCCCTAGTGCTTCTTATGAATCGACT
SPAC19B12.02c	gas1	I	4879633	819	0.731301	8.56148	0.983102	4.3314	1.01478	11.5367	ATTCTCTGAAATTGTTGCCTTGTTCAGTGACAAC
SPAC19B12.02c	gas1	I	4879402	1050	0.731301	8.56148	0.983102	4.3314	1.01478	11.5367	TCAAGCTACCAACAGTGCTTGGATGGCTGCTACT
SPAC19B12.02c	gas1	I	4879629	823	0.243767	31.911	0.327701	16.1443	1.01478	129.001	TCTGAAATTGTTGCCTTGTTCAGTGACAACATGA
SPAC19B12.02c	gas1	I	4880087	365	0.487534	32.6893	0.655401	16.5381	1.01478	66.0736	CTTATGAAGCCATTTCAAGCTCTGATCCTACTTG
SPAC19B12.02c	gas1	I	4880075	377	0.243767	14.0097	0.327701	7.08774	1.01478	56.6346	TTTCAAGCTCTGATCCTACTTGGACTGTTGATTT
SPAC19B12.02c	gas1	I	4880033	419	1.21884	60.7087	1.6385	30.7136	1.01478	49.0833	GATATACTGAAGTCGTTGATTCTTTGGCTCCCTA
SPAC19B12.02c	gas1	I	4880090	362	0.244	10.8964	0.328014	5.51269	1.01478	44.007	AACCTTATGAAGCCATTTCAAGCTCTGATCCTAC
SPAC19B12.02c	gas1	I	4880036	416	0.244	10.1181	0.328014	5.11893	1.01478	40.8637	CTAGATATACTGAAGTCGTTGATTCTTTGGCTCC
SPAC19B12.02c	gas1	I	4879628	824	1.4626	57.5954	1.9662	29.1385	1.01478	38.8052	CTGAAATTGTTGCCTTGTTCAGTGACAACATGAC
SPAC19B12.02c	gas1	I	4880104	348	0.487534	18.6796	0.655401	9.45033	1.01478	37.7564	TTCTGATTTGGCCCAACCTTATGAAGCCATTTCA
SPAC19B12.02c	gas1	I	4880061	391	0.487534	17.123	0.655401	8.6628	1.01478	34.61	CCTACTTGGACTGTTGATTTGTTTTCTAGATATA
SPAC19B12.02c	gas1	I	4880089	363	0.487534	13.2314	0.655401	6.69398	1.01478	26.7441	ACCTTATGAAGCCATTTCAAGCTCTGATCCTACT
SPAC19B12.02c	gas1	I	4879690	762	0.244	6.22653	0.328014	3.15011	1.01478	25.1469	CATGACTGTCCCTATGATTTTCTCAGAGTTTGGA
SPAC19B12.02c	gas1	I	4880115	337	0.731301	16.3447	0.983102	8.26904	1.01478	22.0245	ATATACGTTCTTTCTGATTTGGCCCAACCTTATG
SPAC19B12.02c	gas1	I	4880088	364	3.65651	64.6003	4.91551	32.6824	1.01478	17.4099	CCTTATGAAGCCATTTCAAGCTCTGATCCTACTT
SPAC19B12.02c	gas1	I	4880097	355	0.731301	10.1181	0.983102	5.11893	1.01478	13.6342	TTGGCCCAACCTTATGAAGCCATTTCAAGCTCTG
SPAC19B12.02c	gas1	I	4880084	368	0.731301	10.1181	0.983102	5.11893	1.01478	13.6342	ATGAAGCCATTTCAAGCTCTGATCCTACTTGGAC
SPAC19B12.02c	gas1	I	4880060	392	1.4626	19.4579	1.9662	9.84409	1.01478	13.1099	CTACTTGGACTGTTGATTTGTTTTCTAGATATAC
SPAC19B12.02c	gas1	I	4880130	322	6.09418	70.0485	8.19252	35.4387	1.01478	11.3269	TTTCAAGATGCTGGTATATACGTTCTTTCTGATT
SPAC19B12.02c	gas1	I	4880062	390	2.68144	30.3544	3.60471	15.3568	1.01478	11.1553	TCCTACTTGGACTGTTGATTTGTTTTCTAGATAT
SPAC19B12.02c	gas1	I	4879820	632	0.487534	5.44822	0.655401	2.75635	1.01478	11.0123	TGGCGTATTACTTTGACTGCGGTGATGATGATGA
SPAC19B12.02c	gas1	I	4879094	1358	0.487534	5.44822	0.655401	2.75635	1.01478	11.0123	TTTCTGCCTCTTCTGCCACTGGTACTTGTGCTTC
SPAC19B12.02c	gas1	I	4879602	850	1.21884	13.2314	1.6385	6.69398	1.01478	10.6976	AACATGACTGATGTTTGGTCTGGTGGTATTGCTT
SPAC19B12.02c	gas1	I	4880131	321	3.90027	40.4725	5.24321	20.4757	1.01478	10.2257	TTTTCAAGATGCTGGTATATACGTTCTTTCTGAT
SPAC19B12.03	bgs3	I	4886012	2015	0.244	6.22653	11.1964	156.6	0.939699	27.1561	CATACTTGTGGTACATGCTAATTAGCACTATGTT
SPAC19B12.03	bgs3	I	4885874	1877	0.243767	4.6699	11.1857	117.45	0.939699	20.3866	ATCCGATTCGTTTTTTGCAAAGAATGAAGCCGTA
SPAC19B12.03	bgs3	I	4885286	1289	0.244	3.11327	11.1964	78.3	0.939699	13.5781	GCCGAATTTGGATTTTGCACATATCCGTTTTTTG
SPAC19B12.03	bgs3	I	4885647	1650	0.243767	16.3447	11.1857	411.075	0.939699	71.3529	TTCCATTGGATGTGTTGCTTATCAATCATTTATT
SPAC19B12.03	bgs3	I	4889340	5343	0.487534	13.2314	22.3714	332.775	0.939699	28.881	ATTATGTACATTCGTTGCTATGATTGTCGTTCCC
SPAC19B12.03	bgs3	I	4888347	4350	0.244	5.44822	11.1964	137.025	0.939699	23.7616	CTGGGTTACCATGTTTGCTCTTGTTATTTGTCCA
SPAC19B12.03	bgs3	I	4884447	450	0.244	4.6699	11.1964	117.45	0.939699	20.3671	GTATGCCTCATGGACTGCTGAAACCAAGGCTCCT
SPAC19B12.03	bgs3	I	4886949	2952	0.244	4.6699	11.1964	117.45	0.939699	20.3671	CTCTATGCAGCGTTATGCAAAATTTAATAGAGAT
SPAC19B12.06c	NA	I	4894658	364	0.244	14.788	1.37168	36.2727	0.881897	68.723	GCATACTTAATAGCTTGCTATGTTGCTGAGTCTG
SPAC19B12.06c	NA	I	4894199	675	0.243767	7.78317	1.37037	19.0909	0.881897	36.2046	TTCTAAAATTATCGATGCTATCCCCAATTATATA
SPAC19B12.06c	NA	I	4894917	155	0.243767	7.78317	1.37037	19.0909	0.881897	36.2046	TCGTTGACTTTTTTGGCCTAAGCTGGCATAATTT
SPAC19B12.06c	NA	I	4894701	321	0.243767	4.6699	1.37037	11.4545	0.881897	21.7228	AATCGCCATGTTTTTTGGATTTTTGGAAGTAATT
SPAC19B12.06c	NA	I	4894953	119	0.244	4.6699	1.37168	11.4545	0.881897	21.702	CTATCATTCTTGGAATCGTAAACATTTTCTTGCC
SPAC19B12.06c	NA	I	4894912	160	0.244	4.6699	1.37168	11.4545	0.881897	21.702	GACTTTTTTGGCCTAAGCTGGCATAATTTAATAA
SPAC19B12.06c	NA	I	4894951	121	0.244	3.11327	1.37168	7.63636	0.881897	14.468	ATCATTCTTGGAATCGTAAACATTTTCTTGCCTA
SPAC19B12.06c	NA	I	4894914	158	0.244	3.11327	1.37168	7.63636	0.881897	14.468	TTGACTTTTTTGGCCTAAGCTGGCATAATTTAAT
SPAC19B12.06c	NA	I	4894799	223	0.244	3.11327	1.37168	7.63636	0.881897	14.468	CCGCTCGTTCATCATGGAGTAATTTCTTTCATTT
SPAC19B12.06c	NA	I	4894730	292	0.244	3.11327	1.37168	7.63636	0.881897	14.468	TTTGAACGCAGATACGGAACATTATGTACAATCG
SPAC19D5.02c	NA	I	5205900	234	0.487534	7.78317	12.1081	120	0.678208	23.539	TACCAACACATGGCTTGCAGGCGCCAGCAAATAC
SPAC19D5.03	cid1	I	5206851	139	0.243767	4.6699	12.8211	149.143	0.568661	33.6883	AAGGAATTTACGAAGTTTTGCTATGAAGTGTATA
SPAC19G12.06c	hta2	I	4053243	3	0.243767	4.6699	0.302521	6.50959	0.912642	20.9909
SPAC19G12.07c	rsd1	I	4055390	535	0.243767	3.11327	7.64557	57.5238	0.84182	15.1713	TATTCACGCAGCCCTCCTTACTCTTCGCGGCATA
SPAC19G12.08	scs7	I	4057586	341	0.244	3.11327	0.717226	4.95962	1.08862	11.7206	TCAAGAAGCCTTTATTGCCCCAAATTTTGTTTGG
SPAC19G12.08	scs7	I	4057684	439	0.244	8.56148	0.717226	13.639	1.08862	32.2317	TCTGCTCCTTTGTTTGGAAACTTTTTGGAGCCTC
SPAC19G12.08	scs7	I	4057622	377	0.243767	4.6699	0.716541	7.43943	1.08862	17.5977	ACATCAAGAAGGATGTTTATTTGGACCAAGTTCA
SPAC19G12.08	scs7	I	4057767	522	0.244	4.6699	0.717226	7.43943	1.08862	17.5809	CACTTATGGATTCTTGTACGCCTGTACCGGAATT
SPAC19G12.08	scs7	I	4057807	562	0.243767	3.89158	0.716541	6.19952	1.08862	14.6648	TCTGTTGCTATCACCTTCTTCATCATTGGATTAT
SPAC19G12.08	scs7	I	4057808	563	0.243767	3.89158	0.716541	6.19952	1.08862	14.6648	CTGTTGCTATCACCTTCTTCATCATTGGATTATT
SPAC19G12.08	scs7	I	4057387	142	0.243767	3.11327	0.716541	4.95962	1.08862	11.7318	GCTGATATCCTTAATGCTACCTCCAAGTCCAAGC
SPAC19G12.08	scs7	I	4057628	383	0.244	3.11327	0.717226	4.95962	1.08862	11.7206	AGAAGGATGTTTATTTGGACCAAGTTCACCGTCC
SPAC19G12.08	scs7	I	4057739	494	0.244	3.11327	0.717226	4.95962	1.08862	11.7206	TGATTCCATTGATTTGGGTTCCCTGTGTCACTTA
SPAC19G12.08	scs7	I	4057759	514	0.244	3.11327	0.717226	4.95962	1.08862	11.7206	CCCTGTGTCACTTATGGATTCTTGTACGCCTGTA
SPAC19G12.08	scs7	I	4057865	620	0.244	3.11327	0.717226	4.95962	1.08862	11.7206	CTATGCATCGTTTCCTCTTCCACTTGGATGAGTA
SPAC19G12.08	scs7	I	4057685	440	0.487534	5.44822	1.43308	8.67933	1.08862	10.2653	CTGCTCCTTTGTTTGGAAACTTTTTGGAGCCTCT
SPAC19G12.10c	cpy1	I	4062970	1547	0.244	3.11327	0.567422	2.7102	1.18321	10.7836	TTGCCTACCTTGAAATGCTCAAGGCTGAAGGTAT
SPAC19G12.10c	cpy1	I	4061879	2638	0.731301	9.3398	1.70064	8.1306	1.18321	10.794	TACGATTACAAGGGATGCAATACTGAAGTAAACA
SPAC19G12.10c	cpy1	I	4062384	2133	4.38781	99.6245	10.2038	86.7264	1.18321	19.1892	TTTGGACTTTCACATTGCTGGTGAATCCTATGCT
SPAC19G12.10c	cpy1	I	4062345	2172	0.243767	3.11327	0.56688	2.7102	1.18321	10.794	TTACATCCCCCAGTTTGCCAAGGAAATTATGGAG
SPAC19G12.10c	cpy1	I	4062479	2038	0.243767	42.0291	0.56688	36.5877	1.18321	145.718	AACGGAGATGACTCGGTTCTTGACACTGTTACGG
SPAC19G12.10c	cpy1	I	4062890	1627	0.243767	14.0097	0.56688	12.1959	1.18321	48.5728	TCTAATGCTCAACCTGCTGATTCTTCACGTCCCT
SPAC19G12.10c	cpy1	I	4062733	1784	0.244	12.4531	0.567422	10.8408	1.18321	43.1346	CCGGTTACTTAGATGTCGAAGATGACAGACATCT
SPAC19G12.10c	cpy1	I	4062548	1969	0.244	11.6748	0.567422	10.1633	1.18321	40.4387	AACCCTCACAGTTGGAACTCCAATGCTTCAGTTA
SPAC19G12.10c	cpy1	I	4062857	1660	0.244	10.8964	0.567422	9.4857	1.18321	37.7428	TACGCTGTTTTTTCACAAGAAGAGAATGGTGAAC
SPAC19G12.10c	cpy1	I	4062520	1997	0.243767	10.1181	0.56688	8.80815	1.18321	35.0803	CAGTTATCTTTTTGGATCAACCTATCAACACGGG
SPAC19G12.10c	cpy1	I	4063033	1484	0.487534	18.6796	1.13376	16.2612	1.18321	32.3819	CAATTCCCCCCCTATTTGAATTCGACGATGATTT
SPAC19G12.10c	cpy1	I	4062907	1610	0.244	9.3398	0.567422	8.1306	1.18321	32.3509	GTCATCCTGCTAAGCCATCTAATGCTCAACCTGC
SPAC19G12.10c	cpy1	I	4062493	2024	0.243767	8.56148	0.56688	7.45305	1.18321	29.6834	ACACGGGTTTCAGCAACGGAGATGACTCGGTTCT
SPAC19G12.10c	cpy1	I	4063009	1508	0.244	8.56148	0.567422	7.45305	1.18321	29.655	ACGATGATTTGGAGTTGAGTGATCTCACTCCTGA
SPAC19G12.10c	cpy1	I	4062954	1563	0.244	8.56148	0.567422	7.45305	1.18321	29.655	GCTCAAGGCTGAAGGTATTGATCCTATGACTGCT
SPAC19G12.10c	cpy1	I	4062424	2093	0.244	8.56148	0.567422	7.45305	1.18321	29.655	TCTTGAACCTTTTCTTTGCCAAGTTCCCTCAGTA
SPAC19G12.10c	cpy1	I	4062856	1661	0.243767	7.78317	0.56688	6.7755	1.18321	26.9849	ACGCTGTTTTTTCACAAGAAGAGAATGGTGAACA
SPAC19G12.10c	cpy1	I	4062425	2092	0.244	7.78317	0.567422	6.7755	1.18321	26.9591	TTCTTGAACCTTTTCTTTGCCAAGTTCCCTCAGT
SPAC19G12.10c	cpy1	I	4062973	1544	0.243767	7.00485	0.56688	6.09795	1.18321	24.2864	AATTTGCCTACCTTGAAATGCTCAAGGCTGAAGG
SPAC19G12.10c	cpy1	I	4062881	1636	0.243767	7.00485	0.56688	6.09795	1.18321	24.2864	CAACCTGCTGATTCTTCACGTCCCTACGCTGTTT
SPAC19G12.10c	cpy1	I	4062728	1789	0.243767	7.00485	0.56688	6.09795	1.18321	24.2864	TACTTAGATGTCGAAGATGACAGACATCTTTTCT
SPAC19G12.10c	cpy1	I	4062610	1907	0.243767	7.00485	0.56688	6.09795	1.18321	24.2864	CTGGTTTGTTCATGGAATTAGGTCCTTCTTCAAT
SPAC19G12.10c	cpy1	I	4063484	1033	0.244	7.00485	0.567422	6.09795	1.18321	24.2632	CCTCCTTTCAAACACCATGAGCTTGAGGAGCATG
SPAC19G12.10c	cpy1	I	4063036	1481	0.244	7.00485	0.567422	6.09795	1.18321	24.2632	CATCAATTCCCCCCCTATTTGAATTCGACGATGA
SPAC19G12.10c	cpy1	I	4062744	1773	0.244	7.00485	0.567422	6.09795	1.18321	24.2632	TAAGCAATACACCGGTTACTTAGATGTCGAAGAT
SPAC19G12.10c	cpy1	I	4063031	1486	0.487534	12.4531	1.13376	10.8408	1.18321	21.5879	ATTCCCCCCCTATTTGAATTCGACGATGATTTGG
SPAC19G12.10c	cpy1	I	4063418	1099	0.244	6.22653	0.567422	5.4204	1.18321	21.5673	AAGGAACACCATAAGGGACCCAAGGATAAGGAGC
SPAC19G12.10c	cpy1	I	4062454	2063	0.244	6.22653	0.567422	5.4204	1.18321	21.5673	CTGTTACGGCTGGTAAGGATGTTTATGCATTCTT
SPAC19G12.10c	cpy1	I	4063034	1483	2.1939	49.034	5.10192	42.6857	1.18321	18.8894	TCAATTCCCCCCCTATTTGAATTCGACGATGATT
SPAC19G12.10c	cpy1	I	4064077	440	0.243767	5.44822	0.56688	4.74285	1.18321	18.8894	CTCCCCGCAGAAAGCACGGTAAATGCAAAGGAAA
SPAC19G12.10c	cpy1	I	4063446	1071	0.243767	5.44822	0.56688	4.74285	1.18321	18.8894	TCCTGAGCATCATCGTGGACCTGAGGACAAGGAA
SPAC19G12.10c	cpy1	I	4063108	1409	0.243767	5.44822	0.56688	4.74285	1.18321	18.8894	TTTTAGACACTCTTGGTATTGAATACTATGGTAA
SPAC19G12.10c	cpy1	I	4062734	1783	0.243767	5.44822	0.56688	4.74285	1.18321	18.8894	ACCGGTTACTTAGATGTCGAAGATGACAGACATC
SPAC19G12.10c	cpy1	I	4064156	361	0.244	5.44822	0.567422	4.74285	1.18321	18.8714	CGTCTCGACAATATCTTTGACGATGATGAGGATG
SPAC19G12.10c	cpy1	I	4062892	1625	0.244	5.44822	0.567422	4.74285	1.18321	18.8714	CATCTAATGCTCAACCTGCTGATTCTTCACGTCC
SPAC19G12.10c	cpy1	I	4062755	1762	0.975068	20.2362	2.26752	17.6163	1.18321	17.5402	ATTGACACTGTTAAGCAATACACCGGTTACTTAG
SPAC19G12.10c	cpy1	I	4062616	1901	0.487534	10.1181	1.13376	8.80815	1.18321	17.5402	CCCTTACTGGTTTGTTCATGGAATTAGGTCCTTC
SPAC19G12.10c	cpy1	I	4064203	314	0.731301	14.788	1.70064	12.8735	1.18321	17.0904	ACTCTTTCCTTCAGCCTGCTCGTGATTTCCTTCA
SPAC19G12.10c	cpy1	I	4064329	188	0.243767	4.6699	0.56688	4.0653	1.18321	16.1909	TTATGAATCCCGTTCCCGAGCGTGATGAAGCTGA
SPAC19G12.10c	cpy1	I	4064138	379	0.243767	4.6699	0.56688	4.0653	1.18321	16.1909	GACGATGATGAGGATGAACACGTTCGCGAGAAGC
SPAC19G12.10c	cpy1	I	4064119	398	0.243767	4.6699	0.56688	4.0653	1.18321	16.1909	ACGTTCGCGAGAAGCGCCCTCATGACTCAGCTGA
SPAC19G12.10c	cpy1	I	4063437	1080	0.243767	4.6699	0.56688	4.0653	1.18321	16.1909	TCATCGTGGACCTGAGGACAAGGAACACCATAAG
SPAC19G12.10c	cpy1	I	4063093	1424	0.243767	4.6699	0.56688	4.0653	1.18321	16.1909	GTATTGAATACTATGGTAACATTCCTGTACATAT
SPAC19G12.10c	cpy1	I	4062920	1597	0.243767	4.6699	0.56688	4.0653	1.18321	16.1909	TTCCGTGACCAGAGTCATCCTGCTAAGCCATCTA
SPAC19G12.10c	cpy1	I	4062883	1634	0.243767	4.6699	0.56688	4.0653	1.18321	16.1909	CTCAACCTGCTGATTCTTCACGTCCCTACGCTGT
SPAC19G12.10c	cpy1	I	4064208	309	0.244	4.6699	0.567422	4.0653	1.18321	16.1755	GCTTGACTCTTTCCTTCAGCCTGCTCGTGATTTC
SPAC19G12.10c	cpy1	I	4062737	1780	0.244	4.6699	0.567422	4.0653	1.18321	16.1755	TACACCGGTTACTTAGATGTCGAAGATGACAGAC
SPAC19G12.10c	cpy1	I	4064322	195	0.487534	8.56148	1.13376	7.45305	1.18321	14.8417	TCCCGTTCCCGAGCGTGATGAAGCTGAGGCTCCT
SPAC19G12.10c	cpy1	I	4062398	2119	0.487534	8.56148	1.13376	7.45305	1.18321	14.8417	CCTCAGTACGCTCATTTGGACTTTCACATTGCTG
SPAC19G12.10c	cpy1	I	4062495	2022	0.975068	16.3447	2.26752	14.2286	1.18321	14.1671	CAACACGGGTTTCAGCAACGGAGATGACTCGGTT
SPAC19G12.10c	cpy1	I	4062521	1996	1.4626	24.1278	3.40128	21.0041	1.18321	13.9422	TCAGTTATCTTTTTGGATCAACCTATCAACACGG
SPAC19G12.10c	cpy1	I	4064179	338	0.243767	3.89158	0.56688	3.38775	1.18321	13.4924	ATTTCCTTCACACCGTTTCTGATCGTCTCGACAA
SPAC19G12.10c	cpy1	I	4062923	1594	0.243767	3.89158	0.56688	3.38775	1.18321	13.4924	GCTTTCCGTGACCAGAGTCATCCTGCTAAGCCAT
SPAC19G12.10c	cpy1	I	4062740	1777	0.243767	3.89158	0.56688	3.38775	1.18321	13.4924	CAATACACCGGTTACTTAGATGTCGAAGATGACA
SPAC19G12.10c	cpy1	I	4062719	1798	0.487534	7.78317	1.13376	6.7755	1.18321	13.4924	GTCGAAGATGACAGACATCTTTTCTTCTGGTTCT
SPAC19G12.10c	cpy1	I	4062679	1838	0.243767	3.89158	0.56688	3.38775	1.18321	13.4924	CTAGAAATGATCCCGAGAATGATCCCGTCGTGTT
SPAC19G12.10c	cpy1	I	4062550	1967	0.243767	3.89158	0.56688	3.38775	1.18321	13.4924	ATAACCCTCACAGTTGGAACTCCAATGCTTCAGT
SPAC19G12.10c	cpy1	I	4064467	50	0.244	3.89158	0.567422	3.38775	1.18321	13.4796	TCACTTGCGTCGTATCCGCTCAGTTTAACGGTTA
SPAC19G12.10c	cpy1	I	4064103	414	0.244	3.89158	0.567422	3.38775	1.18321	13.4796	CCCTCATGACTCAGCTGATGAGGATGCTCCCCGC
SPAC19G12.10c	cpy1	I	4064080	437	0.244	3.89158	0.567422	3.38775	1.18321	13.4796	ATGCTCCCCGCAGAAAGCACGGTAAATGCAAAGG
SPAC19G12.10c	cpy1	I	4063472	1045	0.244	3.89158	0.567422	3.38775	1.18321	13.4796	CACCATGAGCTTGAGGAGCATGAAGGTCCTGAGC
SPAC19G12.10c	cpy1	I	4063440	1077	0.244	3.89158	0.567422	3.38775	1.18321	13.4796	GCATCATCGTGGACCTGAGGACAAGGAACACCAT
SPAC19G12.10c	cpy1	I	4063059	1458	0.244	3.89158	0.567422	3.38775	1.18321	13.4796	TCAAGAAAATGCCCCAAAGGATTCATCAATTCCC
SPAC19G12.10c	cpy1	I	4062928	1589	0.244	3.89158	0.567422	3.38775	1.18321	13.4796	TGACTGCTTTCCGTGACCAGAGTCATCCTGCTAA
SPAC19G12.10c	cpy1	I	4062800	1717	0.244	3.89158	0.567422	3.38775	1.18321	13.4796	GATCACACTCTTCGCGTTAAAGATTCCAAACCTG
SPAC19G12.10c	cpy1	I	4062797	1720	0.244	3.89158	0.567422	3.38775	1.18321	13.4796	CACACTCTTCGCGTTAAAGATTCCAAACCTGAAT
SPAC19G12.10c	cpy1	I	4062736	1781	0.244	3.89158	0.567422	3.38775	1.18321	13.4796	ACACCGGTTACTTAGATGTCGAAGATGACAGACA
SPAC19G12.10c	cpy1	I	4062697	1820	0.244	3.89158	0.567422	3.38775	1.18321	13.4796	TCTTCTGGTTCTTTGAATCTAGAAATGATCCCGA
SPAC19G12.10c	cpy1	I	4062621	1896	0.244	3.89158	0.567422	3.38775	1.18321	13.4796	CTCTTCCCTTACTGGTTTGTTCATGGAATTAGGT
SPAC19G12.10c	cpy1	I	4062545	1972	0.244	3.89158	0.567422	3.38775	1.18321	13.4796	CCTCACAGTTGGAACTCCAATGCTTCAGTTATCT
SPAC19G12.10c	cpy1	I	4062451	2066	0.244	3.89158	0.567422	3.38775	1.18321	13.4796	TTACGGCTGGTAAGGATGTTTATGCATTCTTGAA
SPAC19G12.10c	cpy1	I	4064229	288	0.243767	3.11327	0.56688	2.7102	1.18321	10.794	ACACCCTGGATTTAAAGACAAGCTTGACTCTTTC
SPAC19G12.10c	cpy1	I	4064206	311	0.243767	3.11327	0.56688	2.7102	1.18321	10.794	TTGACTCTTTCCTTCAGCCTGCTCGTGATTTCCT
SPAC19G12.10c	cpy1	I	4064194	323	0.243767	3.11327	0.56688	2.7102	1.18321	10.794	TTCAGCCTGCTCGTGATTTCCTTCACACCGTTTC
SPAC19G12.10c	cpy1	I	4064058	459	0.243767	3.11327	0.56688	2.7102	1.18321	10.794	TAAATGCAAAGGAAAAGGAAAGCACCATAAGGGT
SPAC19G12.10c	cpy1	I	4063130	1387	0.243767	3.11327	0.56688	2.7102	1.18321	10.794	ATTGCCGAAGAGTTTTCTCGCTTTTTAGACACTC
SPAC19G12.10c	cpy1	I	4062794	1723	0.487534	6.22653	1.13376	5.4204	1.18321	10.794	ACTCTTCGCGTTAAAGATTCCAAACCTGAATCAC
SPAC19G12.10c	cpy1	I	4062771	1746	0.243767	3.11327	0.56688	2.7102	1.18321	10.794	ACCTGAATCACTTGGTATTGACACTGTTAAGCAA
SPAC19G12.10c	cpy1	I	4062674	1843	0.243767	3.11327	0.56688	2.7102	1.18321	10.794	AATGATCCCGAGAATGATCCCGTCGTGTTGTGGT
SPAC19G12.10c	cpy1	I	4062673	1844	0.243767	3.11327	0.56688	2.7102	1.18321	10.794	ATGATCCCGAGAATGATCCCGTCGTGTTGTGGTT
SPAC19G12.10c	cpy1	I	4062659	1858	0.243767	3.11327	0.56688	2.7102	1.18321	10.794	GATCCCGTCGTGTTGTGGTTGAACGGTGGTCCTG
SPAC19G12.10c	cpy1	I	4062655	1862	0.243767	3.11327	0.56688	2.7102	1.18321	10.794	CCGTCGTGTTGTGGTTGAACGGTGGTCCTGGTTG
SPAC19G12.10c	cpy1	I	4062604	1913	0.243767	3.11327	0.56688	2.7102	1.18321	10.794	TGTTCATGGAATTAGGTCCTTCTTCAATCAACAT
SPAC19G12.10c	cpy1	I	4064269	248	0.731301	9.3398	1.70064	8.1306	1.18321	10.794	ACGAGTTTAATGATGACTTTGAAGATGATACTGC
SPAC19G12.10c	cpy1	I	4062605	1912	1.4626	18.6796	3.40128	16.2612	1.18321	10.794	TTGTTCATGGAATTAGGTCCTTCTTCAATCAACA
SPAC19G12.10c	cpy1	I	4062452	2065	1.21884	15.5663	2.8344	13.551	1.18321	10.794	GTTACGGCTGGTAAGGATGTTTATGCATTCTTGA
SPAC19G12.10c	cpy1	I	4064383	134	0.244	3.11327	0.567422	2.7102	1.18321	10.7836	ACGAGAAATTTGGGGAGGATTTCATCCGTGAGCA
SPAC19G12.10c	cpy1	I	4064133	384	0.244	3.11327	0.567422	2.7102	1.18321	10.7836	TGATGAGGATGAACACGTTCGCGAGAAGCGCCCT
SPAC19G12.10c	cpy1	I	4064068	449	0.244	3.11327	0.567422	2.7102	1.18321	10.7836	GAAAGCACGGTAAATGCAAAGGAAAAGGAAAGCA
SPAC19G12.10c	cpy1	I	4063493	1024	0.244	3.11327	0.567422	2.7102	1.18321	10.7836	ATGCCTCCTCCTCCTTTCAAACACCATGAGCTTG
SPAC19G12.10c	cpy1	I	4063430	1087	0.244	3.11327	0.567422	2.7102	1.18321	10.7836	GGACCTGAGGACAAGGAACACCATAAGGGACCCA
SPAC19G12.10c	cpy1	I	4063139	1378	0.244	3.11327	0.567422	2.7102	1.18321	10.7836	GTTGAAGAAATTGCCGAAGAGTTTTCTCGCTTTT
SPAC19G12.10c	cpy1	I	4062927	1590	0.244	3.11327	0.567422	2.7102	1.18321	10.7836	GACTGCTTTCCGTGACCAGAGTCATCCTGCTAAG
SPAC19G12.10c	cpy1	I	4062903	1614	0.244	3.11327	0.567422	2.7102	1.18321	10.7836	TCCTGCTAAGCCATCTAATGCTCAACCTGCTGAT
SPAC19G12.10c	cpy1	I	4062695	1822	0.244	3.11327	0.567422	2.7102	1.18321	10.7836	TTCTGGTTCTTTGAATCTAGAAATGATCCCGAGA
SPAC19G12.10c	cpy1	I	4062653	1864	0.244	3.11327	0.567422	2.7102	1.18321	10.7836	GTCGTGTTGTGGTTGAACGGTGGTCCTGGTTGCT
SPAC19G12.10c	cpy1	I	4062552	1965	0.244	3.11327	0.567422	2.7102	1.18321	10.7836	ATATAACCCTCACAGTTGGAACTCCAATGCTTCA
SPAC19G12.16c	adg2	I	4080842	107	0.243767	3.89158	1.11215	11.309	0.783771	20.3686	GGACTAGTGGACATATTGAACCCTTGGAATGGAG
SPAC19G12.16c	adg2	I	4080202	747	0.244	3.89158	1.11322	11.309	0.783771	20.3492	TTTGCCAACGTCTATTATTACATCGACTTCCACA
SPAC19G12.16c	adg2	I	4080164	785	0.244	3.89158	1.11322	11.309	0.783771	20.3492	TTACAGTCTCTTCTTCTAGTCTCAGTAGCTTCAC
SPAC19G12.16c	adg2	I	4079349	1600	0.487534	7.00485	2.22431	20.3562	0.783771	18.3318	TCCTCCTTCTCTAGTTCTCCTTCTCCTACATCCT
SPAC19G12.16c	adg2	I	4080006	943	0.487534	6.22653	2.22431	18.0944	0.783771	16.2949	TCTTCTTTCACCTCCAGCAGCAGCTCATACACTA
SPAC19G12.16c	adg2	I	4080854	95	0.244	3.11327	1.11322	9.04719	0.783771	16.2794	CTTCAGACGTTTGGACTAGTGGACATATTGAACC
SPAC19G12.16c	adg2	I	4080504	445	0.244	3.11327	1.11322	9.04719	0.783771	16.2794	TCTGCTAGCACTTCTATTCCAAGCACTGCTATAA
SPAC19G12.16c	adg2	I	4080366	583	0.244	3.11327	1.11322	9.04719	0.783771	16.2794	CCTCCGCCAGCGTCGAGCACTTCTTCGTTTAGCA
SPAC19G12.16c	adg2	I	4080312	637	0.244	3.11327	1.11322	9.04719	0.783771	16.2794	ATTCCCAGCTCTTCATCGTTTACTACTACTACAG
SPAC19G12.16c	adg2	I	4080292	657	0.244	3.11327	1.11322	9.04719	0.783771	16.2794	TACTACTACTACAGGCTCTCCTTATTATAACACA
SPAC19G12.16c	adg2	I	4080059	890	0.244	3.11327	1.11322	9.04719	0.783771	16.2794	CACCATTCTATTCCAACAGTAGTGTCATCCCTAC
SPAC19G12.16c	adg2	I	4080195	754	0.487534	5.44822	2.22431	15.8326	0.783771	14.258	ACGTCTATTATTACATCGACTTCCACACCCGTTA
SPAC1A6.01c	NA	I	1067066	1331	0.244	3.89158	1.89131	19.0529	0.828448	19.2518	ATCAGAAGTGGTCTAAAGTTCAGGATGATGATGG
SPAC1A6.01c	NA	I	1067174	1223	0.243767	3.11327	1.8895	15.2423	0.828448	15.4162	GTCATAACCCGAAGGCTCCTGTTATTAGAAATTT
SPAC1A6.01c	NA	I	1067129	1268	0.243767	3.11327	1.8895	15.2423	0.828448	15.4162	TTTACCATCAAGACCTACACTCTAGTCATGTCGC
SPAC1A6.03c	NA	I	1071974	152	0.487534	34.2459	3.31017	100.164	1.12816	62.2633	CGCCTCTTTCATTAATGCAAAAACGAGAGGCTTT
SPAC1A6.03c	NA	I	1070770	1356	0.487534	15.5663	3.31017	45.529	1.12816	28.3015	TGTTGACGTTATATTTGCTGTTGACGCAACTTAT
SPAC1A6.03c	NA	I	1071349	777	0.244	7.00485	1.65667	20.4881	1.12816	25.447	TCGTAAGCTTGTCGATGCTACCCAAGGTGGTCCA
SPAC1A6.03c	NA	I	1071232	894	0.243767	6.22653	1.65509	18.2116	1.12816	22.6412	TTTGGAAGAGGAAAAAGCTATCCCTGCCAACACC
SPAC1A6.03c	NA	I	1071041	1085	0.243767	6.22653	1.65509	18.2116	1.12816	22.6412	CTTCAGCTACATTGTTCAACACGTTTCTGTTAGA
SPAC1A6.03c	NA	I	1071623	503	0.243767	3.89158	1.65509	11.3823	1.12816	14.1507	GTTCTTCACTTGCTGGAATTCTTCAATCCGCCAT
SPAC1A6.03c	NA	I	1070789	1337	0.243767	3.89158	1.65509	11.3823	1.12816	14.1507	TGTTACATCCTCAAAGATTTGTTGACGTTATATT
SPAC1A6.03c	NA	I	1071696	430	3.16897	41.2508	21.5161	120.652	1.12816	11.5383	TCTGGCGGTGGACTCCGCGCTATGGTCCACGGAG
SPAC1A6.03c	NA	I	1071869	257	0.243767	3.11327	1.65509	9.1058	1.12816	11.3206	ATATGCTACGACCTGCTTCTGACGGAATAAGTTC
SPAC1A6.03c	NA	I	1071669	457	0.243767	3.11327	1.65509	9.1058	1.12816	11.3206	CACGGAGGAGGTGTTTTAAATGCTTTCGATTCTC
SPAC1A6.03c	NA	I	1071231	895	0.243767	3.11327	1.65509	9.1058	1.12816	11.3206	TTGGAAGAGGAAAAAGCTATCCCTGCCAACACCA
SPAC1A6.03c	NA	I	1071020	1106	0.243767	3.11327	1.65509	9.1058	1.12816	11.3206	CGTTTCTGTTAGAATGGAGTCAGGAAGTAACGTC
SPAC1A6.03c	NA	I	1071738	388	0.244	3.11327	1.65667	9.1058	1.12816	11.3098	GTGATTAATGATTCAGATGGCCCTCGTTTAGGAC
SPAC1A6.03c	NA	I	1071645	481	0.244	3.11327	1.65667	9.1058	1.12816	11.3098	TTCGATTCTCGAAATGGCAATGGTTCTTCACTTG
SPAC1A6.03c	NA	I	1071598	528	0.244	3.11327	1.65667	9.1058	1.12816	11.3098	ATCCGCCATGTATATCGCTGGTCTTTCTGGTGGT
SPAC1A6.03c	NA	I	1071470	656	0.244	3.11327	1.65667	9.1058	1.12816	11.3098	CTCATGGTGACAATGTTGTCGAAAATCTTGCTTA
SPAC1A6.03c	NA	I	1071363	763	0.244	3.11327	1.65667	9.1058	1.12816	11.3098	GGACGCGCTTTATCTCGTAAGCTTGTCGATGCTA
SPAC1A6.03c	NA	I	1071309	817	0.244	3.11327	1.65667	9.1058	1.12816	11.3098	ACATTTTCTAGCATTAGAAACCAAACTTGGTTCC
SPAC1A6.03c	NA	I	1071024	1102	0.244	3.11327	1.65667	9.1058	1.12816	11.3098	AACACGTTTCTGTTAGAATGGAGTCAGGAAGTAA
SPAC1A6.03c	NA	I	1070892	1234	0.244	3.11327	1.65667	9.1058	1.12816	11.3098	TTCACGACTACAAACACCACCGTCAAAAACCCTT
SPAC1A6.04c	plb1	I	1075586	1031	0.487534	20.2362	0.660807	9.42942	1.36678	30.3687	ACTTCAACAAGATAATGCGTAACTTCAATGACTC
SPAC1A6.04c	plb1	I	1075364	1253	12.9197	405.503	17.5114	188.951	1.36678	22.9638	CTTTGTGGCCTTTGTTGCAAAAGGGTCGTGATGT
SPAC1A6.04c	plb1	I	1076324	293	0.244	7.00485	0.330719	3.26403	1.36678	21.0044	TTCGTAACGCCAACTTGCCTGGTTTGAATGCCGA
SPAC1A6.04c	plb1	I	1074873	1744	0.975068	45.9207	1.32161	21.3975	1.36678	34.4567	CCCGAGTGCCAACAATGCTACTATAACTACTGCT
SPAC1A6.04c	plb1	I	1075813	804	0.487534	22.5712	0.660807	10.5174	1.36678	33.8727	CCCCATCATTACCTTTGCTACCCAAAACTATGGT
SPAC1A6.04c	plb1	I	1075615	1002	0.244	7.78317	0.330719	3.6267	1.36678	23.3382	TGGTTTCATGATGGGTGCTTCTTCTACTTACTTC
SPAC1A6.04c	plb1	I	1075984	633	0.975068	21.0146	1.32161	9.79208	1.36678	15.7683	TATTATGAATGAAGTTGCCGAAAAGGCCAATGCT
SPAC1A6.04c	plb1	I	1076206	411	3.16897	66.1569	4.29525	30.8269	1.36678	15.2742	CCTCTCTGCCATGGATGCTCGTCACGACAACCAC
SPAC1A6.04c	plb1	I	1076269	348	1.95014	31.1327	2.64323	14.5068	1.36678	11.6803	TCCTTCTATCGGTATTGCCTTGTCCGGTGGTGGT
SPAC1A6.04c	plb1	I	1076309	308	0.243767	18.6796	0.330404	8.70408	1.36678	56.0652	TGCCTGGTTTGAATGCCGATACTCTTTCTGGCTC
SPAC1A6.04c	plb1	I	1076094	523	0.243767	13.2314	0.330404	6.16539	1.36678	39.7129	GCTCTCAACAATTTCAGTACCATTAACGACTTTA
SPAC1A6.04c	plb1	I	1076082	535	0.487534	21.0146	0.660807	9.79208	1.36678	31.5367	TTCAGTACCATTAACGACTTTAGCAAACTTTGGG
SPAC1A6.04c	plb1	I	1076363	254	0.243767	8.56148	0.330404	3.98937	1.36678	25.6966	CTCGTTCTACTATTACCAACACTGCCATGAAGGA
SPAC1A6.04c	plb1	I	1076186	431	0.243767	7.78317	0.330404	3.6267	1.36678	23.3605	GTCACGACAACCACACTGTTTTGACTGGTCTCCT
SPAC1A6.04c	plb1	I	1076023	594	0.243767	7.78317	0.330404	3.6267	1.36678	23.3605	CAAGAGTGCTATTGTTTTCAACGCTCATTTCTAC
SPAC1A6.04c	plb1	I	1076432	185	0.244	7.78317	0.330719	3.6267	1.36678	23.3382	CCTCTGATAACATTGTCGAGAGTCTCTCCAGCAA
SPAC1A6.04c	plb1	I	1076025	592	0.487534	14.788	0.660807	6.89073	1.36678	22.1925	CCCAAGAGTGCTATTGTTTTCAACGCTCATTTCT
SPAC1A6.04c	plb1	I	1075478	1139	0.243767	7.00485	0.330404	3.26403	1.36678	21.0245	CCATTCCCAACCCCTTCCAAGGTGTTGAGAGTGC
SPAC1A6.04c	plb1	I	1076294	323	0.243767	6.22653	0.330404	2.90136	1.36678	18.6884	CCGATACTCTTTCTGGCTCTGAAGGTCCTTCTAT
SPAC1A6.04c	plb1	I	1076093	524	0.244	6.22653	0.330719	2.90136	1.36678	18.6706	CTCTCAACAATTTCAGTACCATTAACGACTTTAG
SPAC1A6.04c	plb1	I	1076081	536	0.244	6.22653	0.330719	2.90136	1.36678	18.6706	TCAGTACCATTAACGACTTTAGCAAACTTTGGGC
SPAC1A6.04c	plb1	I	1075979	638	0.244	6.22653	0.330719	2.90136	1.36678	18.6706	TGAATGAAGTTGCCGAAAAGGCCAATGCTGGCTT
SPAC1A6.04c	plb1	I	1076075	542	1.70637	38.1375	2.31283	17.7708	1.36678	16.3524	CCATTAACGACTTTAGCAAACTTTGGGCTTTCAA
SPAC1A6.04c	plb1	I	1076477	140	0.487534	10.8964	0.660807	5.07738	1.36678	16.3524	CTAAGCAAGAGGGACCCAGTTACGCTCCTTATTA
SPAC1A6.04c	plb1	I	1076379	238	0.243767	5.44822	0.330404	2.53869	1.36678	16.3524	TCTGAATACTTGAGCACTCGTTCTACTATTACCA
SPAC1A6.04c	plb1	I	1076336	281	0.243767	5.44822	0.330404	2.53869	1.36678	16.3524	TGAAGGACTTCCTTCGTAACGCCAACTTGCCTGG
SPAC1A6.04c	plb1	I	1076289	328	0.243767	5.44822	0.330404	2.53869	1.36678	16.3524	ACTCTTTCTGGCTCTGAAGGTCCTTCTATCGGTA
SPAC1A6.04c	plb1	I	1076070	547	0.243767	5.44822	0.330404	2.53869	1.36678	16.3524	AACGACTTTAGCAAACTTTGGGCTTTCAACCACC
SPAC1A6.04c	plb1	I	1076327	290	0.244	5.44822	0.330719	2.53869	1.36678	16.3367	TCCTTCGTAACGCCAACTTGCCTGGTTTGAATGC
SPAC1A6.04c	plb1	I	1076138	479	0.244	5.44822	0.330719	2.53869	1.36678	16.3367	ATCTCGTTGGTACTGATGGTAGTGCCTGGACTGT
SPAC1A6.04c	plb1	I	1076010	607	0.244	5.44822	0.330719	2.53869	1.36678	16.3367	GTTTTCAACGCTCATTTCTACAGTTCTATTATGA
SPAC1A6.04c	plb1	I	1075491	1126	0.244	5.44822	0.330719	2.53869	1.36678	16.3367	CAACAAATCATCTCCATTCCCAACCCCTTCCAAG
SPAC1A6.04c	plb1	I	1076462	155	0.243767	4.6699	0.330404	2.17602	1.36678	14.0163	CCAGTTACGCTCCTTATTATGTGGACTGTCCCTC
SPAC1A6.04c	plb1	I	1076058	559	0.243767	4.6699	0.330404	2.17602	1.36678	14.0163	AAACTTTGGGCTTTCAACCACCCTTTGATGTATC
SPAC1A6.04c	plb1	I	1076144	473	0.731301	14.0097	0.991211	6.52806	1.36678	14.0163	CTGACTATCTCGTTGGTACTGATGGTAGTGCCTG
SPAC1A6.04c	plb1	I	1076351	266	1.70637	32.6893	2.31283	15.2321	1.36678	14.0163	TTACCAACACTGCCATGAAGGACTTCCTTCGTAA
SPAC1A6.04c	plb1	I	1076434	183	0.244	4.6699	0.330719	2.17602	1.36678	14.0029	TCCCTCTGATAACATTGTCGAGAGTCTCTCCAGC
SPAC1A6.04c	plb1	I	1076295	322	0.244	4.6699	0.330719	2.17602	1.36678	14.0029	GCCGATACTCTTTCTGGCTCTGAAGGTCCTTCTA
SPAC1A6.04c	plb1	I	1076066	551	0.244	4.6699	0.330719	2.17602	1.36678	14.0029	ACTTTAGCAAACTTTGGGCTTTCAACCACCCTTT
SPAC1A6.04c	plb1	I	1075251	1366	0.244	4.6699	0.330719	2.17602	1.36678	14.0029	GAGCGTGTCGTTGCTGCCCAAGCTGCCGGAAACA
SPAC1A6.04c	plb1	I	1076026	591	1.21884	21.7929	1.65202	10.1548	1.36678	13.0819	TCCCAAGAGTGCTATTGTTTTCAACGCTCATTTC
SPAC1A6.04c	plb1	I	1076147	470	0.487534	8.56148	0.660807	3.98937	1.36678	12.8483	CCTCTGACTATCTCGTTGGTACTGATGGTAGTGC
SPAC1A6.04c	plb1	I	1076366	251	1.21884	21.0146	1.65202	9.79208	1.36678	12.6147	GCACTCGTTCTACTATTACCAACACTGCCATGAA
SPAC1A6.04c	plb1	I	1076074	543	1.4626	24.1278	1.98242	11.2428	1.36678	12.0696	CATTAACGACTTTAGCAAACTTTGGGCTTTCAAC
SPAC1A6.04c	plb1	I	1076342	275	0.487534	7.78317	0.660807	3.6267	1.36678	11.6803	CTGCCATGAAGGACTTCCTTCGTAACGCCAACTT
SPAC1A6.04c	plb1	I	1075380	1237	0.487534	7.78317	0.660807	3.6267	1.36678	11.6803	ACTGGTGAGAAGATTCCTTTGTGGCCTTTGTTGC
SPAC1A6.04c	plb1	I	1076261	356	0.975068	14.788	1.32161	6.89073	1.36678	11.0962	TCGGTATTGCCTTGTCCGGTGGTGGTTTACGTGC
SPAC1A6.04c	plb1	I	1076159	458	0.975068	14.0097	1.32161	6.52806	1.36678	10.5122	GTCTCCTTCAAGCCTCTGACTATCTCGTTGGTAC
SPAC1A6.04c	plb1	I	1076348	269	3.16897	45.1424	4.29525	21.0348	1.36678	10.4224	CCAACACTGCCATGAAGGACTTCCTTCGTAACGC
SPAC1A6.04c	plb1	I	1076064	553	3.41274	46.699	4.62565	21.7602	1.36678	10.0116	TTTAGCAAACTTTGGGCTTTCAACCACCCTTTGA
SPAC1A6.09c	lag1	I	1088714	276	0.243767	27.2411	3.4	212.72	0.871957	128.161	TTCCTTACGGCCCTATGCGGAGCCATTTATTTTT
SPAC1A6.09c	lag1	I	1088314	676	0.244	3.89158	3.40325	30.3886	0.871957	18.2912	TTAGAACAAAGAAGGGCCGATCATTGGCAAATGT
SPAC1A6.09c	lag1	I	1088674	316	0.243767	3.11327	3.4	24.3109	0.871957	14.6469	TATAAACAACCCGATGGCTCTTACGGTAAAGGCC
SPAC1A6.09c	lag1	I	1088712	278	0.244	3.11327	3.40325	24.3109	0.871957	14.6329	CCTTACGGCCCTATGCGGAGCCATTTATTTTTCT
SPAC1A6.09c	lag1	I	1088675	315	0.244	3.11327	3.40325	24.3109	0.871957	14.6329	ATATAAACAACCCGATGGCTCTTACGGTAAAGGC
SPAC1B1.01	deb1	I	3537092	466	0.243767	3.11327	4.82215	50.8673	0.843016	15.1498	CAGTCGGGCCTCACGAATCACAAGCGAACGTACC
SPAC1B1.03c	kap95	I	3541587	2493	0.244	3.11327	1.31167	15.2247	0.886392	14.3946	GGCAGATTGGGTAGCTGCTCTTCTCAATTCTGGA
SPAC1B1.03c	kap95	I	3543907	173	0.243767	3.11327	1.31041	15.2247	0.886392	14.4084	TTCGTATGGCTGCTGGTTTGGCTTTGAAAAATGC
SPAC1B2.03c	NA	I	2812136	305	27.0581	735.509	58.7441	425.313	1.28109	21.2183	TCATCAGTGGAGCTTTGCTTGCTTTGTTGGTAGA
SPAC1B2.03c	NA	I	2811511	930	0.975068	26.4628	2.1169	15.3023	1.28109	21.1846	CTCTGTTGCTGCCGCTGCTGGCTCTGAAGCTTTA
SPAC1B2.03c	NA	I	2812262	179	0.243767	17.9013	0.529226	10.3515	1.28109	57.3231	GGTCGAGCGTAATTGTATCCATTACCGCTTACTA
SPAC1B2.03c	NA	I	2812194	247	0.244	9.3398	0.529732	5.40081	1.28109	29.8791	AATCGCAAACCTTTGAAACAACGTCGTCTTTTTC
SPAC1B2.03c	NA	I	2812259	182	0.243767	8.56148	0.529226	4.95074	1.28109	27.4154	CGAGCGTAATTGTATCCATTACCGCTTACTATGT
SPAC1B2.03c	NA	I	2812178	263	1.21884	37.3592	2.64613	21.6032	1.28109	23.9262	AACAACGTCGTCTTTTTCAACTTCACAACTTCAT
SPAC1B2.03c	NA	I	2812205	236	0.731301	18.6796	1.58768	10.8016	1.28109	19.9385	CGATCATGACAAATCGCAAACCTTTGAAACAACG
SPAC1B2.03c	NA	I	2812232	209	0.244	5.44822	0.529732	3.15047	1.28109	17.4295	ACTATGTTATCATTTTGAGTGGTCGAGCGATCAT
SPAC1B2.03c	NA	I	2812179	262	0.244	4.6699	0.529732	2.7004	1.28109	14.9396	AAACAACGTCGTCTTTTTCAACTTCACAACTTCA
SPAC1B2.03c	NA	I	2812301	140	0.243767	3.89158	0.529226	2.25034	1.28109	12.4615	AATTTGAGTACATCCCGGGTAAAACTCCCATGTC
SPAC1B2.03c	NA	I	2812289	152	0.243767	3.89158	0.529226	2.25034	1.28109	12.4615	TCCCGGGTAAAACTCCCATGTCTCAGTGGTCGAG
SPAC1B2.03c	NA	I	2812151	290	0.487534	7.78317	1.05845	4.50067	1.28109	12.4615	ACTTCATTTTGACTATCATCAGTGGAGCTTTGCT
SPAC1B2.03c	NA	I	2812443	41	0.244	3.89158	0.529732	2.25034	1.28109	12.4496	TGAAAATTCACCGACCCAGCATTGACCATCCATT
SPAC1B2.03c	NA	I	2812154	287	0.244	3.89158	0.529732	2.25034	1.28109	12.4496	ACAACTTCATTTTGACTATCATCAGTGGAGCTTT
SPAC1B3.03c	wis2	I	4930014	1000	0.243767	5.44822	0.418196	5.25368	1.84606	12.1069	ATTTCAAAGAAGCTTGCAGAAATTCGTCAAAAGA
SPAC1B3.03c	wis2	I	4930886	128	0.243767	4.6699	0.418196	4.50315	1.84606	10.3774	TGTGTAATGGGTTTGAGAAGGATGGCCGTTGTTT
SPAC1B3.03c	wis2	I	4930217	797	0.487534	9.3398	0.836392	9.00631	1.84606	10.3774	TATACGCAAACCTTGCCCTTGTAGCTTTGAAGCA
SPAC1B3.03c	wis2	I	4930178	836	0.243767	4.6699	0.418196	4.50315	1.84606	10.3774	AACCTCAGGAAGCTATTCGAAACGCCAACATTGT
SPAC1B3.03c	wis2	I	4930691	323	0.244	4.6699	0.418596	4.50315	1.84606	10.3675	TGGCCAATGCCGGCCCTAATACCAATGGATCTCA
SPAC1B3.03c	wis2	I	4930594	420	0.244	4.6699	0.418596	4.50315	1.84606	10.3675	AATTCAAGGAAAATCTACTGTTCGTACCATTGAA
SPAC1B3.10c	NA	I	4947685	398	0.244	15.5663	26.6254	492.593	0.984551	64.7975	TCAAGTATTATGATATGCTACAAAAAGCGAATGG
SPAC1B3.10c	NA	I	4947342	741	0.243767	7.78317	26.6	246.296	0.984551	32.4297	TATGGGTGTGTACGGTGCTGCTTCTGCTTATACC
SPAC1B3.10c	NA	I	4946409	1674	0.244	6.22653	26.6254	197.037	0.984551	25.919	GTTTTACTCTCGTGCTGCCGCTCAGGGTGATATT
SPAC1B3.13	NA	I	4951874	272	0.244	3.11327	3.28808	41.2085	0.834611	15.2877	CTCCTGAGAATGCATTTGAGCTATATGTGATTTT
SPAC1B3.14	vma3	I	4955254	342	0.487534	7.00485	0.504411	6.63733	1.00537	14.2912	TGGTATTGTTGGTGATGCTGGTGTCCGTGGTACC
SPAC1B3.14	vma3	I	4955212	300	0.243767	10.1181	0.252205	9.58725	1.00537	41.2856	TTTGTCAGTCGGTTTGGCTGGTCTGGCTGCTGGT
SPAC1B3.14	vma3	I	4955097	185	0.487534	8.56148	0.504411	8.11229	1.00537	17.467	CTGTTGTTATGGCTGGTATTATTGCTATTTATGG
SPAC1B3.14	vma3	I	4955123	211	0.243767	3.89158	0.252205	3.68741	1.00537	15.8791	ATTTATGGTCTTGTTGTTTCTGTCTTGATTTCCG
SPAC1B3.14	vma3	I	4955076	164	0.244	3.11327	0.252447	2.94992	1.00537	12.6911	TGATTGTTAAGAATACCATTCCTGTTGTTATGGC
SPAC1B3.14	vma3	I	4955162	250	0.244	3.11327	0.252447	2.94992	1.00537	12.6911	TTAAAGCAAATTCTCAGTCTTTACAGTGGATTTA
SPAC1B3.14	vma3	I	4955290	378	0.244	3.11327	0.252447	2.94992	1.00537	12.6911	TCAACAACCTCGTCTCTTTGTAGCCATGATTTTA
SPAC1B3.14	vma3	I	4955328	416	0.244	3.11327	0.252447	2.94992	1.00537	12.6911	TTATTTTTGCTGAAGTCTTGGGACTTTATGGCCT
SPAC1B3.14	vma3	I	4954876	152	0.731301	7.78317	0.756617	7.37481	1.00537	10.5861	TGCGCCCTGATTTGATTGTTAAGAATACCATTCC
SPAC1B3.16c	vht1	I	4959792	1007	0.243767	7.00485	0.63363	9.15554	1.03091	27.8743	GGCAATGGTCTGATTTGCTAAAGTCTTGCTTGGA
SPAC1B3.16c	vht1	I	4959833	966	0.487534	44.3641	1.26726	57.9851	1.03091	88.2686	TCATTCTAGATACATTGCAGAGATGAATGTTGGT
SPAC1B3.16c	vht1	I	4959998	801	0.243767	6.22653	0.63363	8.13826	1.03091	24.7772	GGGAGTCGTTGCTATTGCCCAAGCATTATCCATT
SPAC1B3.16c	vht1	I	4959626	1173	0.243767	6.22653	0.63363	8.13826	1.03091	24.7772	TGCTCCTATTTGGCTTGCCGACGCTTTGGGCATT
SPAC1B3.16c	vht1	I	4960250	549	0.244	3.89158	0.634236	5.08641	1.03091	15.4709	AACGAAACATGGTAATGCGCAAAGTTATGTCGCT
SPAC1B3.16c	vht1	I	4959847	952	0.244	7.00485	0.634236	9.15554	1.03091	27.8477	GCCGACAAATCCCTTCATTCTAGATACATTGCAG
SPAC1B3.16c	vht1	I	4959620	1179	0.731301	19.4579	1.90089	25.4321	1.03091	25.8095	TATTTGGCTTGCCGACGCTTTGGGCATTGTCACT
SPAC1B3.16c	vht1	I	4960485	314	0.243767	6.22653	0.63363	8.13826	1.03091	24.7772	GTTTTACTGTCTCACTTTCGTTTACCATGAATAC
SPAC1B3.16c	vht1	I	4960459	340	2.9252	73.9401	7.60356	96.6418	1.03091	24.5191	ATGAATACGGCTCAGGGCCACAGTCTTATTCAAA
SPAC1B3.16c	vht1	I	4960458	341	2.1939	49.034	5.70267	64.0888	1.03091	21.68	TGAATACGGCTCAGGGCCACAGTCTTATTCAAAC
SPAC1B3.16c	vht1	I	4960460	339	0.244	5.44822	0.634236	7.12098	1.03091	21.6593	CATGAATACGGCTCAGGGCCACAGTCTTATTCAA
SPAC1B3.16c	vht1	I	4960065	734	0.487534	10.1181	1.26726	13.2247	1.03091	20.1314	CAGCTGGTTTCCAAAAGATGGATGGCGCTCGCGG
SPAC1B3.16c	vht1	I	4960611	188	0.243767	4.6699	0.63363	6.10369	1.03091	18.5829	AAACGACGGTAAAAGAGCAAGAATTTACTAGTAG
SPAC1B3.16c	vht1	I	4960659	140	0.243767	3.89158	0.63363	5.08641	1.03091	15.4857	CGACAGTAATCGATTCGTCTGATCTCAATGTTTT
SPAC1B3.16c	vht1	I	4960410	389	0.243767	3.89158	0.63363	5.08641	1.03091	15.4857	CAGCTCACTATCTCGCCTTGGGTTTGGCGTTGTT
SPAC1B3.16c	vht1	I	4960120	679	0.243767	3.89158	0.63363	5.08641	1.03091	15.4857	ATTGGTTGGTATTATACGGCTGCTCAAATTGCAG
SPAC1B3.16c	vht1	I	4960108	691	0.243767	3.89158	0.63363	5.08641	1.03091	15.4857	TATACGGCTGCTCAAATTGCAGCAGCAGCCGTCA
SPAC1B3.16c	vht1	I	4960094	705	0.243767	3.89158	0.63363	5.08641	1.03091	15.4857	AATTGCAGCAGCAGCCGTCAGTTTGGTTTCAGCT
SPAC1B3.16c	vht1	I	4960051	748	0.487534	7.78317	1.26726	10.1728	1.03091	15.4857	AAGATGGATGGCGCTCGCGGCTTGTATGGATACC
SPAC1B3.16c	vht1	I	4960463	336	0.244	3.89158	0.634236	5.08641	1.03091	15.4709	TACCATGAATACGGCTCAGGGCCACAGTCTTATT
SPAC1B3.16c	vht1	I	4960097	702	0.244	3.89158	0.634236	5.08641	1.03091	15.4709	TCAAATTGCAGCAGCAGCCGTCAGTTTGGTTTCA
SPAC1B3.16c	vht1	I	4960055	744	0.244	3.89158	0.634236	5.08641	1.03091	15.4709	CCAAAAGATGGATGGCGCTCGCGGCTTGTATGGA
SPAC1B3.16c	vht1	I	4959965	834	2.68144	36.5809	6.96993	47.8123	1.03091	13.2333	TCCCTGGTGGTTGCCGGCAGTTGCTTCAAAGGAG
SPAC1B3.16c	vht1	I	4960461	338	1.21884	16.3447	3.16815	21.3629	1.03091	13.008	CCATGAATACGGCTCAGGGCCACAGTCTTATTCA
SPAC1B3.16c	vht1	I	4960412	387	0.243767	3.11327	0.63363	4.06913	1.03091	12.3886	CTCAGCTCACTATCTCGCCTTGGGTTTGGCGTTG
SPAC1B3.16c	vht1	I	4960376	423	0.243767	3.11327	0.63363	4.06913	1.03091	12.3886	TTACGTTGGCTACATTATTTTTGAGGTGCCCTCC
SPAC1B3.16c	vht1	I	4960493	306	0.244	3.11327	0.634236	4.06913	1.03091	12.3768	TTGTCTTCGTTTTACTGTCTCACTTTCGTTTACC
SPAC1B3.16c	vht1	I	4960467	332	0.244	3.11327	0.634236	4.06913	1.03091	12.3768	CGTTTACCATGAATACGGCTCAGGGCCACAGTCT
SPAC1B3.16c	vht1	I	4960434	365	0.244	3.11327	0.634236	4.06913	1.03091	12.3768	TTATTCAAACACTTTCTGGCTACTCAGCTCACTA
SPAC1B3.16c	vht1	I	4960069	730	0.244	3.11327	0.634236	4.06913	1.03091	12.3768	GTTTCAGCTGGTTTCCAAAAGATGGATGGCGCTC
SPAC1B3.16c	vht1	I	4959875	924	0.244	3.11327	0.634236	4.06913	1.03091	12.3768	TCCTCAGAGAATTGGCTTCCTCACGCCTGCCGAC
SPAC1B3.16c	vht1	I	4960380	419	0.487534	5.44822	1.26726	7.12098	1.03091	10.84	TGTTTTACGTTGGCTACATTATTTTTGAGGTGCC
SPAC1B3.16c	vht1	I	4960433	366	0.731301	7.78317	1.90089	10.1728	1.03091	10.3238	TATTCAAACACTTTCTGGCTACTCAGCTCACTAT
SPAC1B9.03c	NA	I	2406962	181	0.243767	3.89158	3.5241	51.3158	0.713222	22.3834	CATACAGCTATTCGATTAAAGGAGCGTAAAGCTA
SPAC1D4.02c	NA	I	641536	90	0.244	4.6699	5.35563	70.7727	0.895726	21.3669	ATCATGTGGTTTCAGAGTATTAAAGGTTGAAAAC
SPAC1D4.02c	NA	I	641342	238	0.243767	3.11327	5.35052	47.1818	0.895726	14.2582	TCCCCCGAAGTAACTTTAGAAGTATTTTCTTTAA
SPAC1D4.02c	NA	I	641526	100	0.244	3.11327	5.35563	47.1818	0.895726	14.2446	TTCAGAGTATTAAAGGTTGAAAACGATTCGAAAG
SPAC1D4.05c	NA	I	646640	1115	0.244	3.89158	21.5762	232.8	0.91503	17.4302	AAATGCTTGAGATCTTGCGAAGATTTCTTTGGCT
SPAC1D4.08	pis1	I	651385	293	0.487534	14.0097	3.5493	29.2017	1.38332	20.773	GCGCCACCTCGTGCTTGCTTTGCTTTTTATGTGC
SPAC1D4.08	pis1	I	651744	652	0.244	7.00485	1.77634	14.6009	1.38332	20.7532	TTATGTGGTCCTATTTGCCTTGCCAAACAAATTA
SPAC1D4.08	pis1	I	651390	298	1.4626	32.6893	10.6479	68.1373	1.38332	16.1568	ACCTCGTGCTTGCTTTGCTTTTTATGTGCTGCTT
SPAC1D4.08	pis1	I	651419	327	0.244	6.22653	1.77634	12.9785	1.38332	18.4473	TGCTTATCCAAAATATGCTATAATTTTTCAACTG
SPAC1D4.08	pis1	I	651238	146	0.243767	5.44822	1.77465	11.3562	1.38332	16.1568	CGTTGTACTTTATGTCATGGCACCCAAATTATTG
SPAC1D4.08	pis1	I	651267	175	0.244	5.44822	1.77634	11.3562	1.38332	16.1414	TATTGTACTATTGTGTATTTATACTCAAGTTTAC
SPAC1D4.08	pis1	I	651377	285	0.243767	3.89158	1.77465	8.11159	1.38332	11.5406	AGACCGATGCGCCACCTCGTGCTTGCTTTGCTTT
SPAC1D4.08	pis1	I	651240	148	0.244	3.89158	1.77634	8.11159	1.38332	11.5296	TTGTACTTTATGTCATGGCACCCAAATTATTGTA
SPAC1D4.09c	rtf2	I	652671	455	0.243767	3.89158	2.27358	30.3782	0.670215	23.8197	TCTACGAGGAAAAAGACGTTATTCCCATCAACCC
SPAC1D4.14	tho2	I	674412	3979	0.243767	3.11327	13.8442	165.661	0.757721	16.8551	ACTGCTTCCATATCGGAAGAACAGGCAAAGATTG
SPAC1F12.02c	NA	I	3810016	17	1.4626	14.788	0.397491	7.06232	0.763378	13.2448	TGTTGTTGTACAAGGACGTTATTTCTGGAGACGA
SPAC1F12.07	NA	I	3816062	210	0.243767	5.44822	0.495343	12.9794	0.888407	25.1575	TATCCCCGAAAACTTTCATATTTTATTTATGCAA
SPAC1F12.09	gpi17	I	3820092	1337	0.243767	4.6699	12.8077	203.878	0.865461	22.1353	AGCTGGTTCATTCTATGCAAAGTATGGCCGTTCC
SPAC1F12.09	gpi17	I	3819272	559	0.244	7.00485	12.8199	305.816	0.865461	33.1712	ATAATTGATACACCTAGCAAAGGTCCATCAGAAT
SPAC1F3.06c	spo15	I	630882	420	0.243767	3.11327	6.54849	59.1839	0.62612	20.3978	TTTAAATGAGTTGAAGCAAGTGCGGTCCAAACTG
SPAC1F3.06c	spo15	I	630656	646	0.244	3.11327	6.55475	59.1839	0.62612	20.3783	TTAACGGTTACGGAAAAATTAGATAAAAAAGAAA
SPAC1F3.06c	spo15	I	625479	5823	0.244	3.11327	6.55475	59.1839	0.62612	20.3783	TTTGAGATTATTAGGTCAAAGACATTCTTTTTGT
SPAC1F3.09	mug161	I	636480	1207	0.243767	3.11327	2.42241	23.5804	0.891451	14.3266	ATTGCGCATGCTTCTGCTTTAAGTACTTTGTCGG
SPAC1F3.09	mug161	I	635214	181	0.244	3.11327	2.42473	23.5804	0.891451	14.3129	GCGGACGTTGTTAAACTAAAAAATGAAAAAGTAA
SPAC1F5.02	NA	I	292796	941	0.244	3.11327	0.57761	5.75486	0.799467	15.9597	CAAACCTTAAAAGCATGCTCAAATATCCTTTCCC
SPAC1F5.02	NA	I	292919	818	0.243767	7.00485	0.577058	12.9484	0.799467	35.9437	TTTTTCAACCCCTAGCTAAAAAGTATCAGGATAC
SPAC1F5.02	NA	I	293003	734	0.244	5.44822	0.57761	10.071	0.799467	27.9295	CCTTTGGTAAATATCAGCAAAGTGGTTTGCCTTT
SPAC1F5.02	NA	I	293334	403	0.244	4.6699	0.57761	8.6323	0.799467	23.9396	ACTGTTAAGCCCATATCTAAAGACACCCTTGAAA
SPAC1F5.02	NA	I	292986	751	0.243767	3.89158	0.577058	7.19358	0.799467	19.9687	CAAAGTGGTTTGCCTTTGGGAATTATATTTTATA
SPAC1F5.02	NA	I	293230	507	0.243767	3.11327	0.577058	5.75486	0.799467	15.975	TACCGAGGTTGCCGAAGTAATGAAGGATGACTTT
SPAC1F5.02	NA	I	293126	611	0.243767	3.11327	0.577058	5.75486	0.799467	15.975	TTACTAAAGACGCTGCTCAAGATTCCGATAAGCT
SPAC1F5.02	NA	I	292771	966	0.244	3.11327	0.57761	5.75486	0.799467	15.9597	TCCTTTCCCTACTACTGAATTGACGGCAAAAGCC
SPAC1F5.02	NA	I	292384	1353	0.244	3.11327	0.57761	5.75486	0.799467	15.9597	TGACCGTACGTTAGAGGACTTGAGTGCCTTTATA
SPAC1F5.02	NA	I	292872	865	0.731301	7.78317	1.73117	14.3872	0.799467	13.3125	TTCTTAGATGCTGTACGTTATGGAGCAGTAGCTA
SPAC1F5.03c	NA	I	290244	92	0.243767	3.11327	2.96134	43.7714	0.767042	16.6503	ACCCCAGTTTTAATCGTGATCGTGACACTATAAC
SPAC1F5.06	lsh1	I	280925	219	0.731301	18.6796	8.61443	162.574	0.763592	33.4511	TATTTTTGGTGTTGATGCTTCCAACTTGGCTACC
SPAC1F5.06	lsh1	I	280423	721	0.244	6.22653	2.87422	54.1915	0.763592	33.4191	ACGGTAGAGGGATCTTCACTAGGTAAAAAGCAAA
SPAC1F5.06	lsh1	I	279186	1958	0.244	3.11327	2.87422	27.0957	0.763592	16.7096	CACCTACCTCTGAAGTCACAGATCGTTACAAAAA
SPAC1F5.08c	yam8	I	276159	1071	0.731301	42.0291	99.6136	717.218	1.05059	54.7044	AAATTGTAGTGATTGTGCCAACAGCTACAAAAAT
SPAC1F5.08c	yam8	I	276369	1281	0.244	5.44822	33.2363	92.9727	1.05059	21.2536	TTTAGATTTAGGCTTTGCATGCCCGAAGGCTGGT
SPAC1F5.08c	yam8	I	275994	906	0.244	3.11327	33.2363	53.1273	1.05059	12.1449	CTCAGAAGTTGCTTATGCTGTGCCTGGAAATTCT
SPAC1F5.10	NA	I	271760	443	0.243767	5.44822	0.7397	11.6014	0.738198	30.2766	TTTCTGGCACTCCTGGGCGCGTAACGGACATGAT
SPAC1F5.10	NA	I	271970	233	0.243767	3.11327	0.7397	6.62937	0.738198	17.3009	CAACTTTTTCTATTGGTATTCTTCAGTCGATCGA
SPAC1F5.10	NA	I	271884	319	0.243767	3.11327	0.7397	6.62937	0.738198	17.3009	GCAGTTCAAATCCAGAATGTTGTACTTGCATTGG
SPAC1F5.10	NA	I	271460	743	0.243767	3.11327	0.7397	6.62937	0.738198	17.3009	AAGAGGAATGGAAGTTTGATACTCTGTGTGATTT
SPAC1F5.10	NA	I	271325	878	0.244	3.11327	0.740407	6.62937	0.738198	17.2844	CCAGTATGCACGGTGAGATGCCGCAAAAAGAAAG
SPAC1F5.10	NA	I	271238	965	0.244	3.11327	0.740407	6.62937	0.738198	17.2844	CAGACATATGGGCAAGAGGAATTGATGTTCAGCA
SPAC1F7.02c	has1	I	4218870	283	0.243767	3.11327	1.12792	12.4071	0.827494	15.4339	AAGTTTTCAGACCTACAACTCTCTGAAAACATCC
SPAC1F7.02c	has1	I	4218493	660	0.244	3.11327	1.129	12.4071	0.827494	15.4192	AGTTGCTACTCCTGGTCGTTTACTGGATCACTTG
SPAC1F7.02c	has1	I	4218129	1024	0.244	3.11327	1.129	12.4071	0.827494	15.4192	AAAAAAGTTATTGTTTTCATGTCATCTTGTGCTT
SPAC1F7.03	pkd2	I	4220066	66	0.487534	10.8964	9.67347	53.6122	1.50108	14.8893	ATTTTCATGGGCTGATGCTTTAACCAGATTCATT
SPAC1F7.03	pkd2	I	4220816	816	0.244	3.89158	4.84136	19.1472	1.50108	10.6251	AGATTTGGGTATACATGCTAATGTCGCCCTCGCA
SPAC1F7.03	pkd2	I	4220781	781	1.4626	102.738	29.0204	505.487	1.50108	46.795	GTTAAATCAACTGGCGGCACGCCATCTACTCTTG
SPAC1F7.03	pkd2	I	4220698	698	0.243767	8.56148	4.83673	42.1239	1.50108	23.3975	TCATTTACAGTTGGGGCCGTAATTTCATGTGGTC
SPAC1F7.03	pkd2	I	4220767	767	0.244	7.78317	4.84136	38.2944	1.50108	21.2501	TTTTTACATGGTACGTTAAATCAACTGGCGGCAC
SPAC1F7.03	pkd2	I	4220740	740	1.21884	30.3544	24.1837	149.348	1.50108	16.5909	TTATCAGGATTGGCTTCATGCAAGATGTTTTTAC
SPAC1F7.03	pkd2	I	4220049	49	0.243767	4.6699	4.83673	22.9767	1.50108	12.7623	GTTGTGGTCGTCGAGCTATTTTCATGGGCTGATG
SPAC1F7.03	pkd2	I	4220686	686	0.243767	4.6699	4.83673	22.9767	1.50108	12.7623	CTCTTCCTGCTATCATTTACAGTTGGGGCCGTAA
SPAC1F7.03	pkd2	I	4220780	780	0.244	3.89158	4.84136	19.1472	1.50108	10.6251	CGTTAAATCAACTGGCGGCACGCCATCTACTCTT
SPAC1F7.04	rho1	I	4224643	133	0.243767	3.11327	0.639035	8.95588	0.872989	14.6296	TTTGAAAATTATGTAGCTGATGTTGAGGTTGATG
SPAC1F7.04	rho1	I	4225070	560	0.243767	3.11327	0.639035	8.95588	0.872989	14.6296	AACACAAGCCCAAAGTGAAGCCCTCTAGTGGAAC
SPAC1F7.05	cdc22	I	4227894	597	0.244	3.11327	1.71955	21.5575	1.01056	12.626	TCAACGCTACTTTACCCATGCTTCACCAACTCTT
SPAC1F7.13c	rpl801	I	4251221	196	0.243767	7.00485	0.0713216	3.36506	0.808744	35.5314	GCTTTCCGTAACCCTTATCACTACAGAACCGATG
SPAC1F7.13c	rpl801	I	4250794	623	0.243767	5.44822	0.0713216	2.61727	0.808744	27.6356	TGAACCCCGTCGATCATCCTCACGGTGGTGGTAA
SPAC1F7.13c	rpl801	I	4251214	203	0.244	5.44822	0.0713898	2.61727	0.808744	27.6092	GTAACCCTTATCACTACAGAACCGATGTTGAGAC
SPAC1F8.06	fta5	I	100808	798	0.244	7.78317	23.1821	156.486	1.16878	27.2919	TTTCTTCAGGGTTCCTGCTACTGATAACTGGAGT
SPAC1F8.06	fta5	I	100850	840	0.243767	5.44822	23.16	109.541	1.16878	19.1226	TAAGAACGTCGATGATGCTTTCTTCGGTTGGTTC
SPAC1F8.07c	NA	I	103527	16	1.21884	13.2314	0.138407	2.11694	0.845868	12.8339	ATGACTAAGGACGCTGAATCTACTATGACCGTTG
SPAC20G4.06c	adf1	I	4825605	257	0.243767	5.44822	0.149891	5.09315	0.797504	28.025	TTATCTTTATTAGCTGGTCTCCTGATGTTGCTCC
SPAC20G4.06c	adf1	I	4825575	287	0.244	3.89158	0.150035	3.63796	0.797504	19.9988	CTCCCATTAAATCTAAGATGGTTTACTCTTCTTC
SPAC20G4.06c	adf1	I	4825581	281	0.243767	3.11327	0.149891	2.91037	0.797504	16.0143	ATGTTGCTCCCATTAAATCTAAGATGGTTTACTC
SPAC20G4.07c	sts1	I	4827277	766	0.243767	4.6699	1.68356	15.8066	1.04643	18.3073	TTGTATGCAAACGCGTGCTCGAAGGGAGAGCAGT
SPAC20G4.07c	sts1	I	4826945	1098	0.244	14.788	1.68517	50.0542	1.04643	57.9176	TACCTTTATTCGTTGTGCAAATGGCGGTACTTTG
SPAC20G4.07c	sts1	I	4827362	681	2.9252	54.4822	20.2027	184.41	1.04643	17.7987	TATTTCCGTTGGTGCTGCTGTTCGTCAATATGAA
SPAC20G4.07c	sts1	I	4827584	459	0.244	3.11327	1.68517	10.5377	1.04643	12.1932	TCCTTTGATGAGCGTTGCAATAATAACCGCTTTT
SPAC20G4.07c	sts1	I	4827430	613	0.244	6.22653	1.68517	21.0754	1.04643	24.3864	CGCCTTGGCAAATTGCTTGATTTTAAAATGTTCT
SPAC20G4.07c	sts1	I	4827756	287	0.243767	3.89158	1.68356	13.1721	1.04643	15.2561	ACTTAACTCTTCCTGGTGTTCGGACGCAAGGTTT
SPAC20G4.07c	sts1	I	4827581	462	0.244	3.89158	1.68517	13.1721	1.04643	15.2415	TTTGATGAGCGTTGCAATAATAACCGCTTTTGTC
SPAC20G4.07c	sts1	I	4827544	499	0.243767	3.11327	1.68356	10.5377	1.04643	12.2048	ACCTTTGTTTTGTACACTGGAACTTTGCTTTTTG
SPAC20G4.07c	sts1	I	4827906	137	0.244	3.11327	1.68517	10.5377	1.04643	12.1932	ATTCGCAGTTTATTAAACCAGAATCTTTTACGAT
SPAC20G4.07c	sts1	I	4827229	814	0.244	3.11327	1.68517	10.5377	1.04643	12.1932	TGGGACATGGCTTATGAAAAGTTTGGTTTTATGC
SPAC20G4.08	pdc1	I	4829267	211	0.243767	3.11327	5.19453	50.6824	0.812213	15.7243	TCAAACCAGTCACCATCAAATTCAGGACCAAAAT
SPAC20G8.03	itr2	I	1394020	125	0.244	4.6699	1.18837	12.6023	0.932938	20.5147	CTTTTTCTGAGGACATGCGTGAAATCCCTTCTTT
SPAC20G8.03	itr2	I	1395233	1338	0.243767	24.9061	1.18723	67.212	0.932938	109.516	TTTCCTTGCTAGCTATGCTTCTGGAATCGGAAAT
SPAC20G8.03	itr2	I	1394585	690	0.487534	14.0097	2.37447	37.8068	0.932938	30.8014	CTACTCACTTAATGCTGCTTTTGAACATGTACAT
SPAC20G8.03	itr2	I	1394582	687	0.244	6.22653	1.18837	16.803	0.932938	27.3529	TGCCTACTCACTTAATGCTGCTTTTGAACATGTA
SPAC20G8.03	itr2	I	1395113	1218	1.95014	24.9061	9.49787	67.212	0.932938	13.6895	TTCAGCCGTGATGATTGCAGGTTTGGCGCTTTGT
SPAC20G8.03	itr2	I	1394399	504	0.244	3.11327	1.18837	8.40151	0.932938	13.6765	ATCTGTTATTATGGCTGCTTCGCGGAATGTTGCA
SPAC20G8.03	itr2	I	1394282	387	0.243767	3.89158	1.18723	10.5019	0.932938	17.1119	GATTACCTCTGCCACTTCCTTCGCCGCCCTTATA
SPAC20G8.03	itr2	I	1394394	499	0.243767	3.89158	1.18723	10.5019	0.932938	17.1119	ATCGGATCTGTTATTATGGCTGCTTCGCGGAATG
SPAC20G8.03	itr2	I	1394419	524	0.243767	3.89158	1.18723	10.5019	0.932938	17.1119	CGCGGAATGTTGCAATGATGGTTGTTGGTCGTTT
SPAC20G8.03	itr2	I	1394317	422	0.244	3.89158	1.18837	10.5019	0.932938	17.0956	CTGCAACCACTTCAGGATGGCTTGCTGATTGGGT
SPAC20G8.03	itr2	I	1394298	403	0.487534	7.00485	2.37447	18.9034	0.932938	15.4007	TCCTTCGCCGCCCTTATATCTGCAACCACTTCAG
SPAC20G8.03	itr2	I	1393973	78	0.244	3.11327	1.18837	8.40151	0.932938	13.6765	TATCGTGGAAATGACCACTCGTCCTTCTGAAACC
SPAC20G8.04c	NA	I	1397800	122	0.243767	5.44822	2.1147	60.6986	0.88052	25.3828	TCCCTCTCGCTTCTCCTAGTACTCTTTTAAAAAT
SPAC20G8.07c	erg2	I	1410999	135	0.731301	14.788	3.17308	33.8005	0.99349	20.354	ATCTAAGCAGTCTATTGCTTTATACGCAAATGAT
SPAC20G8.07c	erg2	I	1410735	399	0.487534	7.78317	2.11538	17.7898	0.99349	16.069	TGGCCGTCAACTTGCTGCTTCTGCTAATGACCTT
SPAC20G8.07c	erg2	I	1410942	192	0.244	3.89158	1.0587	8.89488	0.99349	16.0536	GAGCGACAGACTCGTTGCTGAATACGGAGACTTA
SPAC20G8.07c	erg2	I	1410729	405	0.975068	14.788	4.23077	33.8005	0.99349	15.2655	TCAACTTGCTGCTTCTGCTAATGACCTTGAGGCT
SPAC20G8.07c	erg2	I	1410627	507	0.244	3.11327	1.0587	7.1159	0.99349	12.8429	TGGTGAACCTTGTTTTGCTCTTGAACTAGCTCAA
SPAC20G8.07c	erg2	I	1410950	184	0.243767	5.44822	1.05769	12.4528	0.99349	22.4966	TACGACTTGAGCGACAGACTCGTTGCTGAATACG
SPAC20G8.07c	erg2	I	1411083	51	0.244	5.44822	1.0587	12.4528	0.99349	22.4751	TTTTATTGCTGGATTGATTTATTATATACAAAAA
SPAC20G8.07c	erg2	I	1411048	86	0.244	4.6699	1.0587	10.6739	0.99349	19.2643	ATCATCTTCGTTCCTTCTATCAATTTGATCCAGC
SPAC20G8.07c	erg2	I	1410979	155	0.244	3.89158	1.0587	8.89488	0.99349	16.0536	TATACGCAAATGATACCAAAGCTCTTCTTTACGA
SPAC20G8.07c	erg2	I	1411026	108	0.243767	3.11327	1.05769	7.1159	0.99349	12.8552	ATTTGATCCAGCAAAGTTGCAGGAGCTATCTAAG
SPAC20G8.07c	erg2	I	1411030	104	0.244	3.11327	1.0587	7.1159	0.99349	12.8429	ATCAATTTGATCCAGCAAAGTTGCAGGAGCTATC
SPAC20G8.07c	erg2	I	1410687	447	0.244	3.11327	1.0587	7.1159	0.99349	12.8429	TCTTCCTGGTGACCAACATGTTCATCCTTGGGGT
SPAC20H4.01	utp5	I	2111959	527	0.244	3.11327	3.837	43.0323	0.747814	17.0621	CAACGGTTTTTAAAAATTTAGCGTTAGCTTCGTC
SPAC20H4.05c	NA	I	2119879	259	0.244	3.11327	2.66534	25.4444	0.516306	24.7126	ATGCCAGCTCTTCGATTGAAACCTTCTCAGTGTA
SPAC21E11.06	tif224	I	4258115	380	0.243767	4.6699	2.6	37.9459	0.612736	31.265	TCTTTTCGCACCTCGATTGGAGACGTCGTAGAAC
SPAC21E11.08	lcb2	I	4263165	1278	2.1939	140.875	14.7317	358.048	1.49725	42.8868	TCCAGGCTATGTATATGCTGAATCCATGAGCCCT
SPAC21E11.08	lcb2	I	4262280	393	1.21884	22.5712	8.18428	57.3668	1.49725	12.3685	AGACAATGATGGTTATGCTCCCCTTTACAATCAT
SPAC21E11.08	lcb2	I	4262153	266	0.243767	16.3447	1.63686	41.5415	1.49725	44.7823	TCGAAGATGAGCCTTCATATTACTATGTGGTCGC
SPAC21E11.08	lcb2	I	4263098	1211	0.487534	20.2362	3.27371	51.4323	1.49725	27.7224	CGTTTGGTGCTGCAGGCGGATATATCAGCGCTAC
SPAC21E11.08	lcb2	I	4263052	1165	0.244	7.00485	1.63842	17.8035	1.49725	19.1741	ATTTCTACTGACCACGTAGACATTTTGATGGGAA
SPAC21E11.08	lcb2	I	4262149	262	0.243767	6.22653	1.63686	15.8253	1.49725	17.0599	CAATTCGAAGATGAGCCTTCATATTACTATGTGG
SPAC21E11.08	lcb2	I	4262056	169	0.244	5.44822	1.63842	13.8472	1.49725	14.9132	AACTCTGAGCATTTGTTGGAGAATGAGTTTGCTC
SPAC21E11.08	lcb2	I	4263097	1210	0.244	5.44822	1.63842	13.8472	1.49725	14.9132	TCGTTTGGTGCTGCAGGCGGATATATCAGCGCTA
SPAC21E11.08	lcb2	I	4262228	341	0.243767	4.6699	1.63686	11.869	1.49725	12.795	TTCGCGACTTTTTCGGTAAAAGATTTCATAAGGA
SPAC21E11.08	lcb2	I	4263122	1235	0.243767	4.6699	1.63686	11.869	1.49725	12.795	TCAGCGCTACTCCCAATATTATCAATAAGCTACG
SPAC21E11.08	lcb2	I	4262111	224	0.244	3.89158	1.63842	9.89083	1.49725	10.6523	GTCGGGTTTCCAAAAATCCTGATGGCGCCGAGCT
SPAC222.12c	atp2	I	970206	153	0.243767	5.44822	0.292982	7.14489	1.2913	17.3081	GACGGAAGCAGCAAAACATAATAAAGGATCGATT
SPAC222.12c	atp2	I	970204	155	0.244	5.44822	0.293262	7.14489	1.2913	17.2916	CGGAAGCAGCAAAACATAATAAAGGATCGATTAA
SPAC222.12c	atp2	I	970219	140	0.243767	4.6699	0.292982	6.12419	1.2913	14.8356	TAAGATATGCTTCGACGGAAGCAGCAAAACATAA
SPAC222.12c	atp2	I	969985	374	0.243767	4.6699	0.292982	6.12419	1.2913	14.8356	CAGCCGTTATCGATACTGGGTCACCCATCAGCAT
SPAC222.12c	atp2	I	970270	89	0.244	3.89158	0.293262	5.10349	1.2913	12.3512	GTTATAAGTTACCTCGGAAGTCATGGTTGAATAC
SPAC222.14c	NA	I	976435	184	0.244	3.11327	5.46823	57.5849	0.861083	14.8177	AATAATTTATTTGGGACTTCATTTTCAGTAATGG
SPAC227.09	NA	I	512951	1145	0.244	3.11327	7.13181	83.6	0.684851	18.6308	CTGCAGATAATCTAACAATAAGCGAAATTTTAAG
SPAC227.10	NA	I	514259	259	0.244	3.89158	0.669244	9.58333	0.614207	25.967	ATTCAAACAGCCATGAATGGTTTGCTCGACCAGT
SPAC227.11c	NA	I	514726	757	0.244	5.44822	6.14402	110.695	1.48315	15.0549	CACGTTCCCGGTTTATGCTCATTACCTGCTTTCA
SPAC227.18	lys3	I	530892	371	0.244	3.11327	0.340941	5.37379	0.830143	15.37	ATGATTTGGAATTTTTGCAAGATGACAATGGCAG
SPAC227.18	lys3	I	531012	491	0.243767	4.6699	0.340615	8.06068	0.830143	23.077	ACAAACAATTCCCTGCTATCCGTCCGTTCCCCAA
SPAC227.18	lys3	I	530820	299	0.243767	3.89158	0.340615	6.71723	0.830143	19.2309	CTCATTGCTACAAAAACCAGGAAGGTTGGCGTGA
SPAC227.18	lys3	I	530998	477	0.244	3.11327	0.340941	5.37379	0.830143	15.37	ATTATTGCATCCTAACAAACAATTCCCTGCTATC
SPAC22A12.04c	rps2201	I	1162291	344	0.975068	10.1181	0.29009	3.99141	0.901825	11.5065	TCATGTCCCACAACGAAGCTCGTGCTAAGGACGC
SPAC22A12.07c	ogm1	I	1167847	1655	0.244	7.00485	2.63451	41.5456	0.992361	28.9294	TAACTTGGCCACTTTTGCTTGGTCCTCTTCGCTT
SPAC22A12.07c	ogm1	I	1168974	528	0.243767	6.22653	2.63199	36.9294	0.992361	25.7396	TATGATTGAAATTCCTGCATTGTATTTCATGTCT
SPAC22A12.07c	ogm1	I	1169223	279	1.70637	41.2508	18.4239	244.657	0.992361	24.3607	TCTCTTCAGTTTGGTTGCTGCTCTAACTGGGAAC
SPAC22A12.07c	ogm1	I	1169047	455	0.243767	20.2362	2.63199	120.021	0.992361	83.6537	CTAAAACAGCGGCTTCGCTTGCCGCATTATTTGT
SPAC22A12.07c	ogm1	I	1169290	212	0.244	8.56148	2.63451	50.778	0.992361	35.3582	ACAATTATGCCGTTGACTATGTGAACAATAAACT
SPAC22A12.07c	ogm1	I	1169263	239	0.244	7.78317	2.63451	46.1618	0.992361	32.1438	ATAAACTGCTGATGGATGTCTACCCTCCTTTAGG
SPAC22A12.07c	ogm1	I	1169292	210	0.243767	4.6699	2.63199	27.6971	0.992361	19.3047	TTACAATTATGCCGTTGACTATGTGAACAATAAA
SPAC22A12.07c	ogm1	I	1169337	165	0.487534	8.56148	5.26398	50.778	0.992361	17.696	ACGACTGATGAACCCGGCAAAGGTCGTTTTCGAG
SPAC22A12.07c	ogm1	I	1167931	1571	0.244	3.89158	2.63451	23.0809	0.992361	16.0719	TGGAAAGCTTTGTTGAGCATAACAAGCTTATGTG
SPAC22A12.07c	ogm1	I	1168807	695	0.244	3.11327	2.63451	18.4647	0.992361	12.8575	CGTTTGGTTGGTTGTTGATACTTGCAGCCTTTCA
SPAC22A12.07c	ogm1	I	1168522	980	0.244	3.11327	2.63451	18.4647	0.992361	12.8575	GAAATGCCATCCCTGAGCACGGGTATTTGCATTC
SPAC22A12.08c	NA	I	1171751	289	0.243767	3.11327	4.86648	54.816	0.879172	14.5267	TCCAAGACATTGAGCGTAAGTTTAACAGAGGATG
SPAC22A12.10	NA	I	1175573	953	0.243767	10.8964	1.17036	12.0222	0.832903	53.6679	TCCCATACTGGAATGTGCTTATTCTTCCATTCTT
SPAC22A12.10	NA	I	1174814	194	0.487534	17.9013	2.34073	19.7507	0.832903	44.0844	TCAATATCCTTACTATGCTTGTGTACAAGTATCA
SPAC22A12.10	NA	I	1175312	692	0.244	5.44822	1.17148	6.01109	0.832903	26.8083	TTATGGCATTTGCCCTGCTATTGAATGTCTTACA
SPAC22A12.10	NA	I	1174845	225	2.9252	80.9449	14.0444	89.3077	0.832903	33.223	TCATTATGAGATGGATGCTTTCCCATCATGGGTG
SPAC22A12.10	NA	I	1174686	116	0.244	11.6748	1.17148	12.8809	0.832903	57.4465	GGAATCAACTTTTGAAGGTGATTCCCATGTCTAT
SPAC22A12.10	NA	I	1174762	142	0.243767	7.78317	1.17036	8.58728	0.832903	38.3342	ATGTCTATGGCACCTAATTTGATTACTTTGATCG
SPAC22A12.10	NA	I	1174918	298	13.651	376.705	65.5403	415.624	0.832903	33.1317	TTTGACGCTATTGATGGCTCGCAAGCGCGTCGTA
SPAC22A12.10	NA	I	1174828	208	0.244	4.6699	1.17148	5.15237	0.832903	22.9786	ATGCTTGTGTACAAGTATCATTATGAGATGGATG
SPAC22A12.10	NA	I	1174876	256	0.243767	3.89158	1.17036	4.29364	0.832903	19.1671	GTGTATGCTTCTTGGGCGATTGGCCTTTTTCTTT
SPAC22A12.10	NA	I	1175187	567	0.243767	3.89158	1.17036	4.29364	0.832903	19.1671	ACTATTTGCCCTTACAGCTATTAAGGGTGATTCT
SPAC22A12.10	NA	I	1174877	257	0.975068	14.788	4.68145	16.3158	0.832903	18.2088	TGTATGCTTCTTGGGCGATTGGCCTTTTTCTTTA
SPAC22A12.10	NA	I	1174792	172	0.487534	7.00485	2.34073	7.72855	0.832903	17.2504	ATCGGGCTTGGATTCGTTGTTATCAATATCCTTA
SPAC22A12.10	NA	I	1175147	527	0.487534	7.00485	2.34073	7.72855	0.832903	17.2504	ACTTCTCGGGTCCTGTCGAAGGAATTGTAATGGT
SPAC22A12.10	NA	I	1175146	526	0.487534	6.22653	2.34073	6.86982	0.832903	15.3337	TACTTCTCGGGTCCTGTCGAAGGAATTGTAATGG
SPAC22A12.10	NA	I	1174701	131	0.244	3.11327	1.17148	3.43491	0.832903	15.3191	AGGTGATTCCCATGTCTATGGCACCTAATTTGAT
SPAC22A12.10	NA	I	1174704	134	0.244	3.11327	1.17148	3.43491	0.832903	15.3191	TGATTCCCATGTCTATGGCACCTAATTTGATTAC
SPAC22A12.10	NA	I	1174875	255	0.244	3.11327	1.17148	3.43491	0.832903	15.3191	GGTGTATGCTTCTTGGGCGATTGGCCTTTTTCTT
SPAC22A12.10	NA	I	1174700	130	0.487534	5.44822	2.34073	6.01109	0.832903	13.417	AAGGTGATTCCCATGTCTATGGCACCTAATTTGA
SPAC22A12.10	NA	I	1174805	185	0.487534	5.44822	2.34073	6.01109	0.832903	13.417	TCGTTGTTATCAATATCCTTACTATGCTTGTGTA
SPAC22A12.10	NA	I	1174849	229	1.4626	14.788	7.02218	16.3158	0.832903	12.1392	TATGAGATGGATGCTTTCCCATCATGGGTGTATG
SPAC22A12.11	dak1	I	1177189	125	0.243767	3.11327	1.42286	21.0634	0.759789	16.8092	ATTTCCATGACTACAACAAAAAGAATGTCAGTGT
SPAC22A12.11	dak1	I	1177396	332	0.243767	3.11327	1.42286	21.0634	0.759789	16.8092	ACACCGGTGACATCCTTCACTTTGGTATGGCCTT
SPAC22A12.11	dak1	I	1177903	839	0.244	3.11327	1.42422	21.0634	0.759789	16.7932	TTTCCATGCTTGAATTCAGTGCCATTAGCCACAA
SPAC22A12.15c	bip1	I	1184768	534	0.244	10.8964	0.238249	6.24871	3.18074	14.04	TGTTGTTACTGTCCCCGCCTACTTCAATGACGCT
SPAC22A12.15c	bip1	I	1185285	17	0.244	8.56148	0.238249	4.9097	3.18074	11.0314	TGAAGAAGTTCCAGCTATTTAGCATTTTAAGCTA
SPAC22A12.16	NA	I	1187516	1144	0.243767	6.22653	0.201801	6.5298	0.938704	27.2109	TATGAATATGCCAAGACTGTGCTCGACTTGATGA
SPAC22A12.16	NA	I	1186518	146	0.243767	3.89158	0.201801	4.08113	0.938704	17.0068	TTCAGTTTCCTCTCCCTACCTTGGTGATCCCTGC
SPAC22A12.16	NA	I	1186674	302	0.243767	3.89158	0.201801	4.08113	0.938704	17.0068	AAAGCGGTCTTTTGAAGTTGAATGCCACTTGGGA
SPAC22A12.16	NA	I	1187030	658	0.243767	3.89158	0.201801	4.08113	0.938704	17.0068	ATCATTCGCCTTTATTCAGTGTATGTGGATTGCC
SPAC22A12.16	NA	I	1187213	841	0.243767	3.89158	0.201801	4.08113	0.938704	17.0068	CTCGGCATTAAAACATCTGGTGAAGAATCTGGAG
SPAC22A12.16	NA	I	1187365	993	0.244	3.89158	0.201994	4.08113	0.938704	16.9906	CACTATCTTGAATGCCGAAGGCCGTGTTTGGAAC
SPAC22A12.16	NA	I	1187682	1310	0.244	3.89158	0.201994	4.08113	0.938704	16.9906	ATAAAGTCTCCATCTGGGTTCGTCGTGCCGGACC
SPAC22A12.16	NA	I	1186459	87	0.243767	3.11327	0.201801	3.2649	0.938704	13.6054	CATCTCGAAAGAGGAATATAAGACTGTTTCTGCC
SPAC22A12.16	NA	I	1186956	584	0.243767	3.11327	0.201801	3.2649	0.938704	13.6054	CATCTCGTGCAACCATTGCTTCCACTCTTCTATC
SPAC22A12.16	NA	I	1186994	622	0.243767	3.11327	0.201801	3.2649	0.938704	13.6054	ATTCCCGTTGAACAACATGAATCCCTTGTTGATT
SPAC22A12.16	NA	I	1186757	385	0.487534	5.44822	0.403602	5.71358	0.938704	11.9048	CAGCATGCTGTAGGATATTTAACTACTTTCCTGG
SPAC22E12.02	NA	I	5022424	241	0.244	3.11327	2.53115	24.6729	0.750675	16.9971	TCGTTTAAGGATTCTGATCAATTTTTGAAGGCCT
SPAC22E12.03c	hsp3106	I	5023579	172	0.244	3.89158	1.2087	17.6687	1.02726	15.5259	TATGCAAATCGTTCATACAAGGAAATCCCCAGTG
SPAC22E12.05c	rer1	I	5027172	181	0.487534	13.2314	3.26471	45.801	1.43631	18.8952	GGTTGGTATATTGTTTGCTATACATTAGCCATTT
SPAC22E12.05c	rer1	I	5027187	166	0.487534	10.1181	3.26471	35.0243	1.43631	14.4493	ATTCTACTGGTTCGCGGTTGGTATATTGTTTGCT
SPAC22E12.06c	gmh3	I	5029886	111	0.244	18.6796	6.09728	224.075	0.898021	85.2494	TTTTTCTGCTTCACCTGCTTTAGAACGTTTACAA
SPAC22E12.06c	gmh3	I	5029532	465	0.244	5.44822	6.09728	65.3551	0.898021	24.8644	GAATAAGCATCCTCATGCGAAATGGATTTGGTGG
SPAC22E12.06c	gmh3	I	5029160	837	0.243767	3.11327	6.09146	37.3458	0.898021	14.2218	TCACCCGGAAATTGCTGCTATAATAGGAATTTTA
SPAC22E12.07	rna1	I	5031955	172	0.243767	6.22653	1.30303	40.9163	0.81263	31.4325	TCAGAGAATATTGCCTCAAAAAAAGATTTAGAAA
SPAC22E12.09c	krp1	I	5034925	1643	0.244	3.11327	6.53999	90.6383	1.0381	12.291	GGACGTTCATGACTGTGCAGCATTGGGCCGAACC
SPAC22E12.09c	krp1	I	5035554	1014	0.244	5.44822	6.53999	158.617	1.0381	21.5093	TTACAGTGAGGTGTGTGCTGCGCAATTAGTTTCA
SPAC22E12.10c	etp1	I	5039000	102	0.243767	3.89158	1.11506	15.6071	0.934644	17.0807	GTCAAGTTGGAGAATGAGCAGGAGCTTCTCTGGA
SPAC22E12.10c	etp1	I	5037646	1456	0.244	3.89158	1.11613	15.6071	0.934644	17.0644	TCTTCTCCTCCCAAAAGTAGCATTTCATCTTCCA
SPAC22E12.10c	etp1	I	5038998	104	0.244	3.11327	1.11613	12.4857	0.934644	13.6515	CAAGTTGGAGAATGAGCAGGAGCTTCTCTGGATC
SPAC22E12.17c	glo3	I	5053908	649	0.244	3.11327	1.70186	20.523	0.873434	14.6082	CGTCCAGATTCTACTTCCACTACCAAATCAAAAA
SPAC22E12.18	NA	I	5055387	168	0.243767	3.11327	2.16953	20.4242	0.667971	19.1198	TATGCTTAAAGATGTTGCCACTTTAATTCATCAA
SPAC22E12.18	NA	I	5055655	436	0.244	4.6699	2.1716	30.6364	0.667971	28.6524	TCAGAAGATTGGAAGACAAGAGGTAGATTAATAG
SPAC22E12.18	NA	I	5055671	452	0.244	3.11327	2.1716	20.4242	0.667971	19.1016	CAAGAGGTAGATTAATAGATACTGGAATTTTGTG
SPAC22E12.18	NA	I	5055493	274	0.487534	5.44822	4.33906	35.7424	0.667971	16.7299	ATGGCTACAACGATTACTCCTTTAATTGCAGCTG
SPAC22F3.07c	atp20	I	691860	233	0.243767	3.11327	1.01709	10.5	0.861071	14.8321	ATACTCATTCTCCCTTCCTTTTTTGGAAAAGTCA
SPAC22F3.08c	rok1	I	689787	305	0.487534	6.22653	3.9187	31.6932	0.827293	15.4377	CTATTGCATATCTATTCCCAATTTTGCAAAAACT
SPAC22F3.08c	rok1	I	689865	383	0.243767	3.11327	1.95935	15.8466	0.827293	15.4377	CGACTAGAGAACTGTGCGAGCAAATATATAGACA
SPAC22F8.04	NA	I	4790804	1016	0.244	4.6699	3.32306	19.6923	1.4193	13.4848	CTGCTCGCAGTATTCTGCAGACTTTACTAGCAGT
SPAC22F8.04	NA	I	4790176	388	0.243767	7.78317	3.31988	32.8205	1.4193	22.4961	ATGGCATTCACATCTCTCATGGTAAAGATGTATT
SPAC22F8.04	NA	I	4790230	442	0.244	6.22653	3.32306	26.2564	1.4193	17.9797	TTTCAAACCCTAAGATTAGCTTCTGCAATTCAAC
SPAC22F8.04	NA	I	4789993	205	0.243767	4.6699	3.31988	19.6923	1.4193	13.4977	TTGGAGGAGATGAGTGTTCTCGAGGCCAATGCAA
SPAC22F8.04	NA	I	4790144	356	0.731301	14.0097	9.95965	59.0769	1.4193	13.4977	TCAACGCACCACTTCTGATGTTGTCGTTTCAAAT
SPAC22F8.06	pam1	I	4795822	344	0.243767	4.6699	1.16897	28.8511	0.820331	23.353	TATATACAACCGTTGCCGGCATCGATAAAGAGGG
SPAC22F8.06	pam1	I	4795610	132	0.243767	3.11327	1.16897	19.234	0.820331	15.5687	TAATACGCGGTTTCAACCTCGCGTGCATGAAGTC
SPAC22F8.06	pam1	I	4795936	458	0.244	3.11327	1.17008	19.234	0.820331	15.5538	TCATTACTCCATTCCTCGACAATCAAGTGAACTT
SPAC22F8.08	sec24	I	4800023	269	0.244	3.89158	2.00552	29.4597	0.748842	21.2984	ATACCTCTCATAAGTCTCGTAGACAGTATCCTGC
SPAC22F8.08	sec24	I	4800308	554	0.244	3.89158	2.00552	29.4597	0.748842	21.2984	CCTCTCCTCCTCCTCCTATTAATTTACCCTTAAG
SPAC22F8.08	sec24	I	4800316	562	0.244	3.89158	2.00552	29.4597	0.748842	21.2984	CCTCCTCCTATTAATTTACCCTTAAGCTATTCCG
SPAC22F8.08	sec24	I	4800310	556	0.244	3.11327	2.00552	23.5678	0.748842	17.0387	TCTCCTCCTCCTCCTATTAATTTACCCTTAAGCT
SPAC22G7.05	NA	I	737606	683	0.244	3.11327	3.1282	35.0634	0.5581	22.862	ATGAATCTGACGAAGATGGTGATTTTTTAGTAAA
SPAC22G7.06c	ura1	I	741229	4804	0.243767	4.6699	0.436912	9.02412	0.744234	25.7409	TTAGACCATGCTCATTGCGATTACAACTTTTCAG
SPAC22G7.06c	ura1	I	743371	2662	0.243767	4.6699	0.436912	9.02412	0.744234	25.7409	TTGCAAACACCTTCGGACCAACGTCTGTTTGCTA
SPAC22G7.06c	ura1	I	741429	4604	0.243767	4.6699	0.436912	9.02412	0.744234	25.7409	TCCAGAGCAGTTTCCAAACTGCTAATCTACCAGG
SPAC22G7.06c	ura1	I	741789	4244	0.244	4.6699	0.43733	9.02412	0.744234	25.7163	TTTTACCTTACGTCAAGAAGTTGTATGAAAACAA
SPAC22G7.06c	ura1	I	741747	4286	0.487534	8.56148	0.873824	16.5442	0.744234	23.5958	TTTTCGCAACAGCCGGTACCTCAGACTACTTTAT
SPAC22G7.06c	ura1	I	743038	2995	0.243767	3.89158	0.436912	7.5201	0.744234	21.4507	TTCACCAACTACCTTTATACCACTTATAATGCTG
SPAC22G7.06c	ura1	I	742270	3763	0.243767	3.89158	0.436912	7.5201	0.744234	21.4507	TTACCACCTCAAGATTTGGCTCCAACGACTATAG
SPAC22G7.06c	ura1	I	741361	4672	0.244	3.89158	0.43733	7.5201	0.744234	21.4303	ACTTCTGAAGCCGTTTCTGACTATACAAAAGAAT
SPAC22G7.06c	ura1	I	744048	1985	0.243767	3.11327	0.436912	6.01608	0.744234	17.1606	GTACGCTTGCTTTTGCTACCAGCCCTCAAGTCTT
SPAC22G7.06c	ura1	I	742585	3448	0.243767	3.11327	0.436912	6.01608	0.744234	17.1606	AAGTGGAAGGAATTAACTAGTTTCGACGAGGCCG
SPAC22G7.06c	ura1	I	742536	3497	0.243767	3.11327	0.436912	6.01608	0.744234	17.1606	CAGTTGGTTATCCTGTGTTAGTTCGTCCTTCTTA
SPAC22G7.06c	ura1	I	741499	4534	0.243767	3.11327	0.436912	6.01608	0.744234	17.1606	GTCAAATGTGCAAAGCTTATGATTGAGGCAATTT
SPAC22G7.06c	ura1	I	740590	5443	0.243767	3.11327	0.436912	6.01608	0.744234	17.1606	TCTGGCGTTCAATTGGAAGTTGATCGTTCTGTTA
SPAC22G7.06c	ura1	I	744483	1550	0.244	3.11327	0.43733	6.01608	0.744234	17.1442	TTTTGATTAATCCCAACATTGCCACTATTCAGAC
SPAC22G7.06c	ura1	I	743770	2263	0.244	3.11327	0.43733	6.01608	0.744234	17.1442	TTGAACCCTTTTACAAAAGAGTATTGCATCATTG
SPAC22G7.06c	ura1	I	742414	3619	0.244	3.11327	0.43733	6.01608	0.744234	17.1442	CATCCTGTTGTTATTTCTAAATATATTGAAAATG
SPAC22G7.06c	ura1	I	742327	3706	0.244	3.11327	0.43733	6.01608	0.744234	17.1442	GTCATTTCCGAACATGTAGAAAACGCTGGTGTGC
SPAC22G7.06c	ura1	I	742251	3782	0.244	3.11327	0.43733	6.01608	0.744234	17.1442	CTCCAACGACTATAGAAAGAATTGTTGACGCCGC
SPAC22G7.06c	ura1	I	741634	4399	0.244	3.11327	0.43733	6.01608	0.744234	17.1442	TTAGCCAACAACATGATTGACATGTATATCAATT
SPAC22H10.12c	gdi1	I	2396590	146	0.243767	3.89158	2.9141	51.2791	0.997339	16.007	CTAGTTTGAATTTAACTCAGTTATATGCTCTGTT
SPAC22H12.02	tfg3	I	895967	356	0.244	3.11327	2.64252	29.6327	0.736049	17.3348	ATTATCATGAGGATATCGAATTGAATATCAATGC
SPAC22H12.05c	fsc1	I	899726	2026	0.244	3.11327	7.08443	83.3143	0.779928	16.3596	TTCATTTCTATTTCGGGACTATTACTGTCTGTTG
SPAC23A1.03	apt1	I	4083701	16	0.243767	3.11327	0.40616	8.15827	0.894231	14.2821	ATGTCCGACGATAGAATCAATTACCTTAAGAATA
SPAC23A1.03	apt1	I	4083985	122	0.243767	3.11327	0.40616	8.15827	0.894231	14.2821	CCAGAGCCTTTGGCATCCTTATCGATCTTTTGCT
SPAC23A1.10	tef102	I	4095206	5	0.975068	10.1181	3.42327	60.7399	0.88147	11.7722
SPAC23A1.11	rpl1602	I	4097340	7	0.243767	3.89158	0.0946463	2.2466	0.608979	26.2149
SPAC23A1.12c	frs1	I	4098849	1222	0.243767	3.11327	1.01027	12.6203	0.744419	17.1563	ATGCCTTTCATCCTTTGCTCCCATGACGAGAATT
SPAC23A1.12c	frs1	I	4099887	184	0.243767	3.89158	1.01027	15.7754	0.744419	21.4454	ATTCCGGCAAATCGCTACGATATGCTCTGCTTAG
SPAC23A1.12c	frs1	I	4099614	457	0.243767	3.89158	1.01027	15.7754	0.744419	21.4454	ACCCATGACTTCTCTGTAATGGAAGGTCCGTTTA
SPAC23A1.12c	frs1	I	4099721	350	0.244	3.11327	1.01124	12.6203	0.744419	17.1399	TCTTACGAGGTGTGAAGCTTGATCCCATTCGTTA
SPAC23A1.17	NA	I	4107908	1082	0.243767	3.89158	6.18414	83.9583	0.715675	22.3067	CACAGGGCGAAATCAGTGAGCAGGAGGAAGATGA
SPAC23C11.01	NA	I	2134308	738	0.243767	14.0097	10.5238	190.944	1.14764	50.0781	TGTTGCTTCTGGACGTGCAAATTTATCTGAAGCA
SPAC23C11.01	NA	I	2133946	429	0.244	5.44822	10.5339	74.256	1.14764	19.4562	AGAGCAGAATAAATATGCCTCTTTTCTTGCTTCT
SPAC23C11.01	NA	I	2134239	669	0.244	3.89158	10.5339	53.04	1.14764	13.8973	TATCTCCAATCCTAATGCATTAATGATCGGATTT
SPAC23C11.01	NA	I	2134293	723	0.487534	7.00485	21.0476	95.472	1.14764	12.5195	AATTTCTATTTATGGTGTTGCTTCTGGACGTGCA
SPAC23C11.01	NA	I	2133821	304	0.244	3.11327	10.5339	42.432	1.14764	11.1178	TACTTTTTCTCTACTGCTTTGTTGAAGCTGTTTG
SPAC23C11.02c	rps23	I	2135689	98	1.4626	15.5663	0.399015	6.2069	0.89589	11.8797	AGAAGCGCTTATTGGGAACCGCTTACAAGTCATC
SPAC23C11.03	NA	I	2136902	758	0.244	6.22653	2.35434	54.8702	0.52771	48.3572	CAAGTAAACCGGATTTCAAAAATGATGTGCAACA
SPAC23C11.05	ipp1	I	2140752	224	0.243767	6.22653	0.130006	4.65552	0.878875	29.0632	TCAAGCAAGATACTAAGAAGGGTAAGCTTCGTTT
SPAC23C11.05	ipp1	I	2140545	17	0.243767	4.6699	0.130006	3.49164	0.878875	21.7974	TGAGTGAATACACTACCCGTGAAGTTGGCGCTTT
SPAC23C11.09	ala1	I	2147299	98	0.243767	5.44822	0.681012	15.8366	0.853911	26.1738	ATACTATTGTTCCTAGCTCTTCTGTAATTCCTTA
SPAC23C11.09	ala1	I	2147378	177	0.243767	3.89158	0.681012	11.3119	0.853911	18.6956	TAAACCCATTTTCCTGGGAACTGTTGATCCTTCT
SPAC23C11.09	ala1	I	2148969	1768	0.243767	3.89158	0.681012	11.3119	0.853911	18.6956	ACGGTTAATGATTCGGTTGTTTGCGAATATGATG
SPAC23C11.09	ala1	I	2147521	320	0.243767	3.11327	0.681012	9.04949	0.853911	14.9565	TGTTTGAAATGTTGGGTAATTGGTCTTTCGGCGA
SPAC23C11.09	ala1	I	2149140	1939	0.243767	3.11327	0.681012	9.04949	0.853911	14.9565	TACAAGTCCTCAATTCCTATTGATAAGCTTCTCT
SPAC23C11.09	ala1	I	2148616	1415	0.244	3.11327	0.681663	9.04949	0.853911	14.9422	GTTCTTCAGGAGATGATCTTCTGGTGCTGGATGT
SPAC23C11.09	ala1	I	2147545	344	0.487534	5.44822	1.36202	15.8366	0.853911	13.0869	CTTTCGGCGATTACTTTAAAAAAGAAGCTATCGC
SPAC23C11.11	cka1	I	2152538	325	0.243767	3.89158	2.22	33.0795	0.779769	20.4732	ATTGTCCGCGATCCAGAGAGTAAAACACCATCTT
SPAC23C11.13c	hpt1	I	2155642	539	0.244	3.11327	0.815739	14.0339	0.795053	16.0484	GCAATACTCCCGACTGCTGGATCATGTATCCTTG
SPAC23C11.14	zhf1	I	2158913	102	0.244	5.44822	1.77338	18.0665	1.18825	18.7913	TGCGATCGATTCACTTGCCCTAATTGCTGATTCA
SPAC23C11.14	zhf1	I	2158922	111	0.244	3.89158	1.77338	12.9047	1.18825	13.4223	TTCACTTGCCCTAATTGCTGATTCATTTCATATG
SPAC23C11.14	zhf1	I	2159369	558	0.244	3.11327	1.77338	10.3237	1.18825	10.7379	TCAAGTCGCAGACTCTGCTACCGAATCTTCTCCT
SPAC23C11.14	zhf1	I	2158954	143	0.243767	4.6699	1.77169	15.4856	1.18825	16.1222	TGTTAAATGACATTGTCAGTTTACTGGTCGCTCT
SPAC23C11.14	zhf1	I	2159115	304	0.243767	3.89158	1.77169	12.9047	1.18825	13.4352	ATGGAAGCCATAGAGCGCTTCATTGAGCCTCCTT
SPAC23C11.14	zhf1	I	2158934	123	0.244	3.11327	1.77338	10.3237	1.18825	10.7379	AATTGCTGATTCATTTCATATGTTAAATGACATT
SPAC23C11.17	mdm28	I	2167916	691	0.244	3.89158	2.26263	34.0654	0.905457	17.6144	TCCAACATGCTACGAAGCACCTTAAAATCGGGAA
SPAC23C4.02	crn1	I	1033817	1456	0.243767	3.11327	1.95032	25.2587	0.807374	15.8185	GTAACCCAGCCCAAGCGTGAGAAAACACCTGTTG
SPAC23C4.02	crn1	I	1033466	1105	0.244	3.11327	1.95219	25.2587	0.807374	15.8034	TACCCTCCAGCCCCATCTGGTAAACCAAGCTTAA
SPAC23C4.05c	NA	I	1037602	525	0.244	6.22653	2.99593	46.4933	1.07679	23.6987	AGCATCAATGGGCGATGCCATTTCCACCAATGAT
SPAC23C4.05c	NA	I	1037113	1014	0.244	3.89158	2.99593	29.0583	1.07679	14.8117	ATTTTATATGGATGTTGCTTCTGAATGGAGCTCT
SPAC23C4.05c	NA	I	1037170	957	0.244	3.11327	2.99593	23.2466	1.07679	11.8494	CATATTTTCCCATGTTGCTTACAACTCGCGTCAT
SPAC23C4.05c	NA	I	1038008	119	0.243767	3.11327	2.99307	23.2466	1.07679	11.8607	CTGCAGCTGATATACATGATGCGCCTAGTACAAC
SPAC23C4.12	hhp2	I	1049452	252	0.244	3.11327	9.19198	102.383	0.953508	13.3814	TTATAATGCTATGGTCATGGATTTATTAGGCCCT
SPAC23C4.16c	atg15	I	1057403	11	0.244	6.22653	15.1931	117.241	0.90121	28.3159
SPAC23C4.16c	atg15	I	1056711	703	0.243767	20.2362	15.1786	381.034	0.90121	92.1146	TCTACGGTTTGTGGTTGCTATAAAAATACATACA
SPAC23D3.04c	gpd2	I	4343425	182	0.243767	3.11327	0.760678	12.0645	0.796325	16.038	CTCAAGTACACATGTGGATGTATGAAGAGAAGAT
SPAC23D3.04c	gpd2	I	4343097	510	0.243767	3.11327	0.760678	12.0645	0.796325	16.038	CACGGGAATGTATTGTGGCGTTCTCTCTGGCGCC
SPAC23D3.04c	gpd2	I	4342826	781	0.243767	3.11327	0.760678	12.0645	0.796325	16.038	AAATCTGCTGTTATGCGCATTGGCCTTCTGGAAA
SPAC23D3.04c	gpd2	I	4343096	511	0.244	3.11327	0.761405	12.0645	0.796325	16.0227	ACGGGAATGTATTGTGGCGTTCTCTCTGGCGCCA
SPAC23D3.04c	gpd2	I	4342534	1073	0.244	3.11327	0.761405	12.0645	0.796325	16.0227	TTACAGCTGTTTATCGCATTGTTTATGAGGGACT
SPAC23D3.07	pup1	I	4351420	290	0.243767	3.11327	0.885463	13.8026	0.801478	15.9349	CAATGATTTCCTCTAATATAGAATTGCACTCTCT
SPAC23D3.11	ayr1	I	4359389	541	0.244	3.11327	8.18212	54.8308	0.947006	13.4733	ATTATGACGGGCGGTGTGCAAACCAAAATTCAAA
SPAC23D3.12	NA	I	4363436	536	0.731301	58.3738	3.47347	190.045	0.429415	185.885	CATCAGAACGCTCTTTGCTTAGTCGTCGTGGTAC
SPAC23D3.12	NA	I	4363531	631	0.244	4.6699	1.15893	15.2036	0.429415	44.5697	ATCATCCTCTTGGCCTGCTTTGAGAAGCCTCTCA
SPAC23D3.12	NA	I	4364178	1278	0.244	19.4579	1.15893	63.3484	0.429415	185.707	AATGTTTGCCATCCTTGCAGGTAGTTGGGACACC
SPAC23D3.12	NA	I	4363359	459	0.244	8.56148	1.15893	27.8733	0.429415	81.7112	AATGATGTGGATCTTTGCTTGGCGTTGGTTGCTG
SPAC23D3.12	NA	I	4363833	933	0.244	6.22653	1.15893	20.2715	0.429415	59.4263	TTTTGGAGATAAACGTGCATCCACTGTTCCAACT
SPAC23D3.12	NA	I	4364331	1431	0.244	3.11327	1.15893	10.1357	0.429415	29.7132	CGCTCATGGTCTTTCTGCTGCTTTGGGTAAATGC
SPAC23D3.12	NA	I	4363290	390	0.731301	8.56148	3.47347	27.8733	0.429415	27.2631	GATCGTCGTTATTATTGCTACCGTCCTTGTCATC
SPAC23D3.12	NA	I	4364334	1434	0.731301	8.56148	3.47347	27.8733	0.429415	27.2631	TCATGGTCTTTCTGCTGCTTTGGGTAAATGCGGT
SPAC23D3.12	NA	I	4363435	535	0.243767	5.44822	1.15782	17.7376	0.429415	52.0477	ACATCAGAACGCTCTTTGCTTAGTCGTCGTGGTA
SPAC23D3.12	NA	I	4363157	257	0.243767	3.11327	1.15782	10.1357	0.429415	29.7416	AAAAGCCTCACTACCCTTCCGGTATCCATGGTCT
SPAC23D3.12	NA	I	4363243	343	0.244	3.11327	1.15893	10.1357	0.429415	29.7132	TTCATGGGCGATTTCTTTGGTCGTAAATTTGTCT
SPAC23D3.12	NA	I	4363369	469	0.244	3.11327	1.15893	10.1357	0.429415	29.7132	ATCTTTGCTTGGCGTTGGTTGCTGGGTTTAGGAA
SPAC23G3.06	NA	I	877282	227	0.244	4.6699	0.94059	21.1594	0.835482	22.9077	TATCCTCTCTCCTAGAAGGGTTATCTGACTCAAA
SPAC23G3.10c	ssr3	I	886129	1042	0.244	3.89158	3.66539	35.6983	0.643699	24.7773	ACTTACTCACAGTCGAAGTATGATTTCATGAAGA
SPAC23G3.10c	ssr3	I	886173	998	0.243767	3.11327	3.66189	28.5587	0.643699	19.8408	TCAGAAGTATTGACGATAAGCTTACCGAGTTAAT
SPAC23G3.10c	ssr3	I	886128	1043	0.243767	3.11327	3.66189	28.5587	0.643699	19.8408	CTTACTCACAGTCGAAGTATGATTTCATGAAGAA
SPAC23G3.11	rpn6	I	888897	1130	0.244	3.11327	1.49435	15.2072	0.734926	17.3613	TTTATGGTATCCTTGACCAGGGTAGCGGATGTCT
SPAC23H3.09c	gly1	I	2508760	282	0.244	3.89158	0.366369	7.25	0.864876	18.4409	TCAGTTGTGTATTCGTAGTCATTTGCATCAACCT
SPAC23H3.09c	gly1	I	2509010	32	0.243767	3.11327	0.366019	5.8	0.864876	14.7668	CTTCTACGACTACCGAAACAAGATTATGCCCTTC
SPAC23H3.09c	gly1	I	2508563	479	0.243767	3.11327	0.366019	5.8	0.864876	14.7668	ACTTTTCACCCACTGGGTTGATTTGTTTAGAAAA
SPAC23H3.09c	gly1	I	2509012	30	0.244	3.11327	0.366369	5.8	0.864876	14.7527	TACTTCTACGACTACCGAAACAAGATTATGCCCT
SPAC23H4.03c	erv25	I	1604109	35	0.244	3.11327	1.97461	7.52601	1.12987	11.2927	CTTCGTTGTTCTTTATGCTAGCATTATTGACTGT
SPAC23H4.03c	erv25	I	1604372	298	0.244	3.89158	1.97461	9.40751	1.12987	14.1159	GCTATGCTCGATATTTGCTTCCTAAATACTTTGA
SPAC23H4.03c	erv25	I	1604531	324	1.4626	41.2508	11.8364	99.7197	1.12987	24.962	TACTTTGACACCAGGTGCTATAGAGTCTGAACAT
SPAC23H4.03c	erv25	I	1604657	450	0.244	5.44822	1.97461	13.1705	1.12987	19.7623	AGCTGATATCCGTCGTGCAAGAGACTTCATTGAA
SPAC23H4.03c	erv25	I	1604765	558	0.244	3.89158	1.97461	9.40751	1.12987	14.1159	GCGTGTCAAGAATTTTGCATATCTTACTTTTATC
SPAC23H4.03c	erv25	I	1604166	92	0.243767	3.11327	1.97273	7.52601	1.12987	11.3035	TTCCTGCCAAAACCAATCCAGAGCCTTTCTGTCT
SPAC23H4.03c	erv25	I	1604300	226	0.243767	3.11327	1.97273	7.52601	1.12987	11.3035	TCTGGCAACACTCATAGCAGTATTCAAAATGTCT
SPAC23H4.03c	erv25	I	1604246	172	0.244	3.11327	1.97461	7.52601	1.12987	11.2927	ACTACTGGTAATATGGGAGATGGACAAACCTTGA
SPAC23H4.03c	erv25	I	1604286	212	0.244	3.11327	1.97461	7.52601	1.12987	11.2927	TGATAACTGATTCATCTGGCAACACTCATAGCAG
SPAC23H4.03c	erv25	I	1604643	436	0.244	3.11327	1.97461	7.52601	1.12987	11.2927	TTGGAACCTGTAGAAGCTGATATCCGTCGTGCAA
SPAC23H4.06	gln1	I	1596582	988	0.243767	3.11327	0.290011	6.27907	0.549898	23.2252	TCTGTCGCCATGAATGGTTGCGGCTACTTTGAGG
SPAC23H4.08	iwr1	I	1594073	238	0.244	3.11327	13.9133	119.143	0.844197	15.1141	ATCCACAGTCATACAAAAATATCATCTCTAAAAA
SPAC23H4.09	cdb4	I	1592182	900	0.244	4.6699	0.584061	12.9248	0.694497	27.558	AAATGAATGTACTAGCCACAAACTTTTGTTCCCT
SPAC23H4.09	cdb4	I	1592941	141	0.243767	3.11327	0.583503	8.61654	0.694497	18.3895	ATGCCAACCTGGAGCCAAAATATACGATATTTGC
SPAC23H4.09	cdb4	I	1591991	1091	0.243767	3.11327	0.583503	8.61654	0.694497	18.3895	TCCTTGAGACTCCCATCAAAGTGACCAAAAACAA
SPAC23H4.09	cdb4	I	1592247	835	0.244	3.11327	0.584061	8.61654	0.694497	18.372	AAGTTTGGTCCTTTCCCATTTTCCACTCGTAATA
SPAC24B11.08c	NA	I	212745	460	0.244	10.8964	9.70348	144.053	1.45667	30.6573	GATACCCCAGGTTGTTGCAATACCTGTGATGCCG
SPAC24B11.12c	NA	I	227302	1301	0.244	6.22653	11.7354	152.362	1.19123	21.4221	ATGATACCAAGATTATGCTGAACTCTGGTGCTCC
SPAC24B11.12c	NA	I	224664	3939	0.244	3.11327	11.7354	76.181	1.19123	10.7111	AGAGGAGATTGAGAATGCCGAACAATCTCCAGAT
SPAC24B11.12c	NA	I	227344	1259	0.244	3.11327	11.7354	76.181	1.19123	10.7111	GGAATACAAAATGGGTGATTGGAGTTGTCGTATT
SPAC24C9.06c	NA	I	3050598	179	0.244	4.6699	0.616013	13.8192	0.79645	24.0303	TCAAAGACAATCTCGAGATTGTTAAGAAGCGCTT
SPAC24C9.06c	NA	I	3050705	72	0.243767	3.89158	0.615425	11.516	0.79645	20.0444	ATCCACCCTCAGAAGCTTTTCATGCGCTCCTGTC
SPAC24C9.06c	NA	I	3049766	1011	0.243767	3.89158	0.615425	11.516	0.79645	20.0444	CATTGCCGCTGATGAAAATGCTCACTATGACCAA
SPAC24C9.06c	NA	I	3050697	80	0.243767	3.11327	0.615425	9.21283	0.79645	16.0355	TCAGAAGCTTTTCATGCGCTCCTGTCGCAGCCAA
SPAC24C9.06c	NA	I	3050551	226	0.243767	3.11327	0.615425	9.21283	0.79645	16.0355	ACATATTCAGAAAAAATCCTTTACGGTCACTTGG
SPAC24C9.08	NA	I	3061869	259	1.4626	73.9401	18.8526	356.698	0.917483	55.1005	TCAACATCTGCGAAATGCTATATTCCTCCAGTCT
SPAC24C9.08	NA	I	3062721	1111	0.487534	14.788	6.28421	71.3396	0.917483	33.0603	TATACTACTTTGCAGTGCTTTGCAGAAAACAGTG
SPAC24C9.08	NA	I	3062849	1239	0.487534	7.00485	6.28421	33.7925	0.917483	15.6601	TTTTGAAACATCCATTGCTGTCGATGTTATCAAT
SPAC24C9.08	NA	I	3061895	285	0.244	3.11327	3.14511	15.0189	0.917483	13.9068	TCCAGTCTTGACTCCTGCAAAGGAGCCAAAACTC
SPAC24C9.08	NA	I	3062534	924	0.244	3.11327	3.14511	15.0189	0.917483	13.9068	ATTTGGTACACTTTTTGCTACTGTTTGTGTTGCT
SPAC24C9.08	NA	I	3062726	1116	0.244	3.11327	3.14511	15.0189	0.917483	13.9068	TACTTTGCAGTGCTTTGCAGAAAACAGTGCTGAT
SPAC24C9.08	NA	I	3062653	1043	0.244	4.6699	3.14511	22.5283	0.917483	20.8603	TGATGAGTAAGCTAGTCACCCAAATTGAAGAACC
SPAC24C9.08	NA	I	3062748	1138	0.244	4.6699	3.14511	22.5283	0.917483	20.8603	AACAGTGCTGATATGGATGACAACTTACGTCAAT
SPAC24C9.08	NA	I	3061785	175	0.243767	3.11327	3.14211	15.0189	0.917483	13.9201	TTACGCGGCGGTTCCAATGACAATGATAAACAAG
SPAC24C9.08	NA	I	3061786	176	0.244	3.11327	3.14511	15.0189	0.917483	13.9068	TACGCGGCGGTTCCAATGACAATGATAAACAAGA
SPAC24C9.08	NA	I	3062626	1016	0.244	3.11327	3.14511	15.0189	0.917483	13.9068	TTCCTCCTCCTCATACAAACATTGGTTTGATGAG
SPAC24C9.11	NA	I	3068043	1407	0.487534	16.3447	29.1	718.941	0.690845	48.5277	AACAAAAGTTGCCAATGCTAGCGCCCAATCTAAA
SPAC24C9.12c	NA	I	3070673	343	0.244	4.6699	0.152209	4.00571	0.852454	22.4516	AACATGCAAGTTTATCAAGCCATTATGCCTCCTC
SPAC24C9.14	otu1	I	3073442	265	0.244	4.6699	5.2431	66.7416	1.81251	10.5594	TCAACGAATGAACCAGCAAAACCTCCAATTCCTA
SPAC24H6.02c	NA	I	488885	107	0.244	3.11327	4.4042	37.0526	0.407019	31.3482	TTTTCTGTTCCCCGAATGTGAGAAACATTTCTAA
SPAC24H6.04	hxk1	I	484309	591	0.243767	3.11327	0.629053	10.5818	0.898795	14.2096	TCTTTTATCAGCAGCCTTGAAGCGTGTTGGGTGT
SPAC24H6.04	hxk1	I	484185	715	0.244	3.11327	0.629654	10.5818	0.898795	14.196	ATCTTTGGAACTGGATGTAATGCTTGTTACATTG
SPAC24H6.07	rps901	I	475578	489	0.243767	4.6699	0.0672426	2.03414	0.943666	20.3009	TGCCCTCTCCTCTCCTTATGGTGGTGGTCGTCCT
SPAC24H6.10c	NA	I	469383	664	0.244	3.89158	0.317859	5.72389	0.89827	17.7554	TCTGCCAACCCTCATCATTTCTTGTCTGTCACAA
SPAC24H6.10c	NA	I	469531	812	0.244	3.89158	0.317859	5.72389	0.89827	17.7554	CTAAACTCGAAGAATGCAACAAGCTACCTAGTAT
SPAC24H6.10c	NA	I	469068	349	0.243767	3.11327	0.317556	4.57911	0.89827	14.2179	CCTCGTACAACTGTTGGATGGAAAGGGTTGATTA
SPAC24H6.10c	NA	I	469134	415	0.243767	3.11327	0.317556	4.57911	0.89827	14.2179	AATAAGGGTATTCGTGTCGCTCGACGCATTTTTC
SPAC24H6.10c	NA	I	469274	555	0.243767	3.11327	0.317556	4.57911	0.89827	14.2179	CACTGAGTCCCAATTGCATCGAGAACTTGCTTCA
SPAC24H6.10c	NA	I	469294	575	0.243767	3.11327	0.317556	4.57911	0.89827	14.2179	GAGAACTTGCTTCAGGGCTTTCTTTTCCAATAGG
SPAC24H6.11c	NA	I	466579	1281	0.243767	17.9013	30.2842	787.75	0.88706	82.7859	TGTTCCTGAAATGTGTGCTTTAACATTTTTTGGA
SPAC24H6.11c	NA	I	466060	762	0.244	3.11327	30.3132	137	0.88706	14.3838	CCCAAAGTCCGTTATTGCAACTACAATTTTGGCG
SPAC24H6.13	NA	I	459163	512	0.244	15.5663	4.36417	136.963	0.951371	67.0574	TTTTTCGACATGCCATGCAATCTTCAGGTCTTTA
SPAC24H6.13	NA	I	458410	1265	0.244	3.11327	4.36417	27.3927	0.951371	13.4115	ATATGCCTCCAAAATTGCTTGGTATCATTACAGG
SPAC24H6.13	NA	I	457751	1924	0.244	3.11327	4.36417	27.3927	0.951371	13.4115	TACTTAGCAGAAGTCTGCTTAATTGGCTTATTTG
SPAC24H6.13	NA	I	459035	640	2.43767	26.4628	43.6	232.838	0.951371	11.4107	GCTTCTGAGTTTACATGCGTCCGTGATCTCAAGA
SPAC24H6.13	NA	I	457533	2142	0.243767	6.22653	4.36	54.7853	0.951371	26.8486	GAAGAACGTGGGTCGTGCTTATCCCGAAATTCTG
SPAC24H6.13	NA	I	457347	2328	0.243767	3.89158	4.36	34.2408	0.951371	16.7804	TTATTTTTCTGACCTTGCTGCTTCTAATAGGATC
SPAC24H6.13	NA	I	459131	544	0.243767	6.22653	4.36	54.7853	0.951371	26.8486	TATAACAATCTTCCTTCTTCCTCTACGATGTTGC
SPAC24H6.13	NA	I	459076	599	0.244	4.6699	4.36417	41.089	0.951371	20.1172	TTTTAAACGATGAGGAAACTCTTCATGAGCTTTT
SPAC24H6.13	NA	I	459196	479	0.244	3.89158	4.36417	34.2408	0.951371	16.7644	TCATAATATATCGTGAGCTTCGCTATTATGTTAT
SPAC24H6.13	NA	I	459103	572	0.244	3.89158	4.36417	34.2408	0.951371	16.7644	TGTTGCTGACTGAGCTTCCAAACTCAGTTTTAAA
SPAC24H6.13	NA	I	459162	513	0.244	3.11327	4.36417	27.3927	0.951371	13.4115	TTTTCGACATGCCATGCAATCTTCAGGTCTTTAT
SPAC24H6.13	NA	I	459159	516	0.244	3.11327	4.36417	27.3927	0.951371	13.4115	TCGACATGCCATGCAATCTTCAGGTCTTTATAAC
SPAC25B8.01	dap1	I	4155724	252	0.244	7.78317	3.60776	35.2817	1.47292	21.6565	ACAAGGCCCTTATAGTGCTTTTGCCGGTCATGAT
SPAC25B8.01	dap1	I	4155742	270	0.731301	12.4531	10.8129	56.4507	1.47292	11.5612	TTTTGCCGGTCATGATGCCAGTCGTGGTTTAGCA
SPAC25B8.01	dap1	I	4155674	202	0.244	10.1181	3.60776	45.8662	1.47292	28.1534	ATCAAGGGAACTGTGTACAACGTTACAATGGGAT
SPAC25B8.12c	NA	I	4177770	161	0.244	7.78317	0.216731	7.19243	1.08432	29.4179	ACCCCAATTTCCCCATTGTTTTGGCTACCGGCAA
SPAC25B8.12c	NA	I	4177824	107	0.243767	3.89158	0.216524	3.59621	1.08432	14.723	ATCATCGTTTCCACTTCCGCACTTATCGTGCTAT
SPAC25B8.12c	NA	I	4177296	635	0.243767	3.89158	0.216524	3.59621	1.08432	14.723	TCGAGTTGATTCCTTCCAACAGCAACAAGGGTAC
SPAC25B8.12c	NA	I	4177287	644	0.243767	3.89158	0.216524	3.59621	1.08432	14.723	TTCCTTCCAACAGCAACAAGGGTACTGCTCTTCA
SPAC25B8.12c	NA	I	4177249	682	0.243767	3.89158	0.216524	3.59621	1.08432	14.723	ATCACCTCTAACATCCTCCCTGAAGTTAAGAATG
SPAC25B8.12c	NA	I	4177245	686	0.243767	3.89158	0.216524	3.59621	1.08432	14.723	CCTCTAACATCCTCCCTGAAGTTAAGAATGAAAA
SPAC25B8.12c	NA	I	4177030	901	0.243767	3.89158	0.216524	3.59621	1.08432	14.723
SPAC25B8.12c	NA	I	4177816	115	0.244	3.89158	0.216731	3.59621	1.08432	14.7089	TTCCACTTCCGCACTTATCGTGCTATGAAGTACA
SPAC25B8.12c	NA	I	4177031	900	0.244	3.89158	0.216731	3.59621	1.08432	14.7089
SPAC25B8.12c	NA	I	4177653	278	0.487534	7.00485	0.433048	6.47319	1.08432	13.2507	ACAACAAGGGAAAGATCGTTTATGCCGATCACTT
SPAC25B8.12c	NA	I	4177649	282	0.243767	3.11327	0.216524	2.87697	1.08432	11.7784	CAAGGGAAAGATCGTTTATGCCGATCACTTGAAG
SPAC25B8.12c	NA	I	4177372	559	0.243767	3.11327	0.216524	2.87697	1.08432	11.7784	CTTGACGTCGTCCGTGACATTCTTGGTAAATTCC
SPAC25G10.05c	his1	I	4305474	146	0.243767	3.89158	0.429163	9.90446	0.890528	17.9268	TTGCCTTAGTACAAAATCTGCCAATCGCTCTGGT
SPAC25G10.05c	his1	I	4305498	122	0.244	3.11327	0.429573	7.92357	0.890528	14.3278	TTCGTCGAAATCCTCGTTTGGACATTGCCTTAGT
SPAC25G10.08	NA	I	4312124	1546	0.244	3.11327	0.379673	4.81858	0.762248	16.739	TTTGATAAGAAAACATGCAATTCACTTTTTATGG
SPAC25G10.08	NA	I	4310823	245	0.243767	5.44822	0.37931	8.43252	0.762248	29.3213	TTTATATGCCATTTGAGGAAAAAAATGGAAAAAA
SPAC25G10.08	NA	I	4311860	1282	0.244	5.44822	0.379673	8.43252	0.762248	29.2933	AAGGTTGATCGTCACACAAAAACTAAGAAATCAA
SPAC25G10.08	NA	I	4311135	557	0.243767	3.89158	0.37931	6.02323	0.762248	20.9438	AGAGCGACGTCCCTGAACAGATTGTGGATCGTGA
SPAC25G10.08	NA	I	4311600	1022	0.243767	3.89158	0.37931	6.02323	0.762248	20.9438	CACCCTCCCTTGCTTTGGTTGACAAGAAAACTAT
SPAC25G10.08	NA	I	4311978	1400	0.243767	3.89158	0.37931	6.02323	0.762248	20.9438	TTGCCTGGGAACCTAAGAGTGATCGTTTTGCCAT
SPAC25G10.08	NA	I	4310868	290	0.244	3.89158	0.379673	6.02323	0.762248	20.9238	GACTAGTTTTCGCCGATTTTGAAAATGTTGATGG
SPAC25G10.08	NA	I	4311280	702	0.244	3.89158	0.379673	6.02323	0.762248	20.9238	TTTCTTGCACCCCTACGTAAAATTTGTCGACTTC
SPAC25G10.08	NA	I	4310699	121	0.243767	3.11327	0.37931	4.81858	0.762248	16.755	GGATATGACACGGTTGTAGTAATCGAAGGTGCTC
SPAC25G10.08	NA	I	4310790	212	0.243767	3.11327	0.37931	4.81858	0.762248	16.755	TTGCTAAAATTGGAAAGGTTAAGGAAAATGGATT
SPAC25G10.08	NA	I	4310874	296	0.243767	3.11327	0.37931	4.81858	0.762248	16.755	TTTTCGCCGATTTTGAAAATGTTGATGGCGCCGA
SPAC25G10.08	NA	I	4311356	778	0.243767	3.11327	0.37931	4.81858	0.762248	16.755	GTTCGACTTCCTCCCATCGGACATCCGGCTCGTG
SPAC25G10.08	NA	I	4311496	918	0.243767	3.11327	0.37931	4.81858	0.762248	16.755	TTCAAAGGATGGCAAAAAAGTTATTTGGCCTATT
SPAC25G10.08	NA	I	4311558	980	0.243767	3.11327	0.37931	4.81858	0.762248	16.755	TTGCTCGCGTTACTGTTGGTCAGTCGATTTCTGT
SPAC25G10.08	NA	I	4311561	983	0.243767	3.11327	0.37931	4.81858	0.762248	16.755	CTCGCGTTACTGTTGGTCAGTCGATTTCTGTTTA
SPAC25G10.08	NA	I	4312083	1505	0.243767	3.11327	0.37931	4.81858	0.762248	16.755	AGAAAAAGAACACCCCTAGTACTTTCCGTCATAT
SPAC25G10.08	NA	I	4310999	421	0.244	3.11327	0.379673	4.81858	0.762248	16.739	ACTCCTGATGAATTTAGTTTCGAAGAACGTGAAT
SPAC25G10.08	NA	I	4311975	1397	0.244	3.11327	0.379673	4.81858	0.762248	16.739	ATTTTGCCTGGGAACCTAAGAGTGATCGTTTTGC
SPAC25H1.05	meu29	I	2530616	479	0.244	3.89158	9.09201	58.3929	0.99077	16.0977	CTGCCTGTTTCCGTATGCTTGGTTATTTGGGAAC
SPAC25H1.05	meu29	I	2530560	423	0.244	4.6699	9.09201	70.0714	0.99077	19.3172	ATTAAAGCCATTCACTGCTGCGTTTGTGCTCCTC
SPAC25H1.07	emc1	I	2535187	1367	0.244	5.44822	3.22881	40.2727	0.80163	27.8542	GCGACCCTAAACAAGTGCACAGGATATTATGGCG
SPAC25H1.07	emc1	I	2534327	507	0.244	23.3495	3.22881	172.597	0.80163	119.375	TTCCTTTTTGACTTATGCTGAGAAAAACTACGTC
SPAC25H1.07	emc1	I	2535428	1608	0.244	4.6699	3.22881	34.5195	0.80163	23.875	ACCTAATCAAATATTTGCCGTAAAAGATTATAAG
SPAC25H1.07	emc1	I	2534979	1159	0.244	4.6699	3.22881	34.5195	0.80163	23.875	ACAACTTTATTGACAAGCTACCAGAAATCCATTC
SPAC25H1.07	emc1	I	2535258	1438	0.244	3.89158	3.22881	28.7662	0.80163	19.8959	TGGCTATTGGATATTTCAGACGAAGATCCAAAAT
SPAC25H1.07	emc1	I	2534811	991	0.243767	3.11327	3.22573	23.013	0.80163	15.9319	CCCAACCAGCTTTCTAGACCTGTATTCCGTTTAT
SPAC25H1.07	emc1	I	2535111	1291	0.244	3.11327	3.22881	23.013	0.80163	15.9167	TCCTCAGTATTGGATGATGCTTTTACCACGAAAA
SPAC26A3.01	sxa1	I	3333349	681	0.244	7.78317	1.26461	13.8342	0.869621	36.6806	TGATGACAAGGTCGTTGCTTTTACTCCCCCTACC
SPAC26A3.01	sxa1	I	3333307	639	7.55678	203.919	39.1656	362.456	0.869621	31.0306	TATCGGTTTGTCAGTTGCCATGACTATTACTGGT
SPAC26A3.01	sxa1	I	3334222	1554	0.243767	6.22653	1.26341	11.0674	0.869621	29.3725	TGGCGTTTCGATCAGTGCTATTGTTCTTTGTGCC
SPAC26A3.01	sxa1	I	3333070	402	0.731301	15.5663	3.79022	27.6684	0.869621	24.4771	GGACATTCGTACTAATGCTTGTACCAACTACACG
SPAC26A3.01	sxa1	I	3333949	1281	3.65651	55.2605	18.9511	98.2228	0.869621	17.3787	TATTTATGATTGGGATGCACAAAAGATTGGTCTT
SPAC26A3.01	sxa1	I	3333234	566	0.243767	13.2314	1.26341	23.5181	0.869621	62.4166	CCCTACCTGGCTTTGAATTTGGATTGGCTACACG
SPAC26A3.01	sxa1	I	3333198	530	0.244	10.8964	1.26461	19.3679	0.869621	51.3528	ACAATATGGTGGATAACGCTTATTTCGCCGGTCT
SPAC26A3.01	sxa1	I	3333212	544	0.244	10.8964	1.26461	19.3679	0.869621	51.3528	AACGCTTATTTCGCCGGTCTTACCCTACCTGGCT
SPAC26A3.01	sxa1	I	3333126	458	0.243767	7.00485	1.26341	12.4508	0.869621	33.0441	CCGCCAGGCGTACCAACTCCAGCACCATTGGATT
SPAC26A3.01	sxa1	I	3333294	626	0.244	6.22653	1.26461	11.0674	0.869621	29.3445	TAACGCCGGGAATTATCGGTTTGTCAGTTGCCAT
SPAC26A3.01	sxa1	I	3332787	119	0.243767	5.44822	1.26341	9.68394	0.869621	25.701	TAAATCTGCAACATAGCCAATATGATCATGTGGC
SPAC26A3.01	sxa1	I	3333114	446	0.244	5.44822	1.26461	9.68394	0.869621	25.6764	ATTCCAGCACTACCGCCAGGCGTACCAACTCCAG
SPAC26A3.01	sxa1	I	3332981	313	0.243767	4.6699	1.26341	8.30052	0.869621	22.0294	ACTTGGGTTACTGCTAAGAACATTACGGCCTTAA
SPAC26A3.01	sxa1	I	3333138	470	0.244	4.6699	1.26461	8.30052	0.869621	22.0084	CCAACTCCAGCACCATTGGATTTTTGGCTTCCTA
SPAC26A3.01	sxa1	I	3332984	316	0.487534	8.56148	2.52681	15.2176	0.869621	20.1936	TGGGTTACTGCTAAGAACATTACGGCCTTAAGTG
SPAC26A3.01	sxa1	I	3333113	445	0.243767	3.89158	1.26341	6.9171	0.869621	18.3578	TATTCCAGCACTACCGCCAGGCGTACCAACTCCA
SPAC26A3.01	sxa1	I	3333140	472	0.244	3.89158	1.26461	6.9171	0.869621	18.3403	AACTCCAGCACCATTGGATTTTTGGCTTCCTATG
SPAC26A3.01	sxa1	I	3333183	515	0.244	3.89158	1.26461	6.9171	0.869621	18.3403	CCACCGTCCTTGGCTACAATATGGTGGATAACGC
SPAC26A3.01	sxa1	I	3333199	531	0.244	3.89158	1.26461	6.9171	0.869621	18.3403	CAATATGGTGGATAACGCTTATTTCGCCGGTCTT
SPAC26A3.01	sxa1	I	3333028	360	0.487534	7.00485	2.52681	12.4508	0.869621	16.522	TTGGAGTGACACCGATGGGGTGGATGCTGGTAGA
SPAC26A3.01	sxa1	I	3332976	308	0.243767	3.11327	1.26341	5.53368	0.869621	14.6863	CTTATACTTGGGTTACTGCTAAGAACATTACGGC
SPAC26A3.01	sxa1	I	3333125	457	0.243767	3.11327	1.26341	5.53368	0.869621	14.6863	ACCGCCAGGCGTACCAACTCCAGCACCATTGGAT
SPAC26A3.01	sxa1	I	3333137	469	0.243767	3.11327	1.26341	5.53368	0.869621	14.6863	ACCAACTCCAGCACCATTGGATTTTTGGCTTCCT
SPAC26A3.01	sxa1	I	3332812	144	0.244	3.11327	1.26461	5.53368	0.869621	14.6722	TCATGTGGCGAGGAAACTGGAACGTACCAAAGTA
SPAC26A3.01	sxa1	I	3332815	147	0.244	3.11327	1.26461	5.53368	0.869621	14.6722	TGTGGCGAGGAAACTGGAACGTACCAAAGTACTG
SPAC26A3.01	sxa1	I	3332946	278	0.244	3.11327	1.26461	5.53368	0.869621	14.6722	TCTATTCTCTCACTTTGGATACTGGTAGTCCTTA
SPAC26A3.01	sxa1	I	3332988	320	0.244	3.11327	1.26461	5.53368	0.869621	14.6722	TTACTGCTAAGAACATTACGGCCTTAAGTGCTTC
SPAC26A3.01	sxa1	I	3333292	624	0.244	3.11327	1.26461	5.53368	0.869621	14.6722	CGTAACGCCGGGAATTATCGGTTTGTCAGTTGCC
SPAC26A3.01	sxa1	I	3333030	362	1.70637	17.9013	8.84385	31.8187	0.869621	12.0637	GGAGTGACACCGATGGGGTGGATGCTGGTAGATC
SPAC26A3.04	rpl2002	I	3338250	503	0.244	3.89158	0.110777	2.47899	0.790365	20.1794	GCAAGAAGGTCTTTGCTCCTCACCGTCCCAGCAC
SPAC26A3.05	chc1	I	3342107	2876	0.243767	4.6699	1.74921	35.8067	0.887542	21.5846	CCGAGGTTTTGCAAGACAGTGCTTACCGCCGTCC
SPAC26A3.05	chc1	I	3339578	347	0.244	3.89158	1.75088	29.8389	0.887542	17.97	GGACTTGGATCAGCGATAGCGTTATCGGTATGGT
SPAC26A3.07c	rpl1101	I	3346701	157	0.243767	3.11327	0.116125	2.35955	0.825554	15.4702	TCCAAGGCTCGTTATACCATCCGTCGTTTTGGTA
SPAC26A3.16	dph1	I	3370014	272	0.243767	3.11327	0.73907	7.87431	1.10224	11.5868	ATGTATCGGACCGCACTCAACAAGTTCCAACGAA
SPAC26A3.16	dph1	I	3369951	209	0.244	3.11327	0.739776	7.87431	1.10224	11.5758	AAGATGGACATAGTATACATTTGGTAAAAACCTT
SPAC26A3.16	dph1	I	3370029	287	0.244	3.11327	0.739776	7.87431	1.10224	11.5758	CTCAACAAGTTCCAACGAATATTCAAGCAGGTCA
SPAC26A3.16	dph1	I	3370116	374	0.244	3.11327	0.739776	7.87431	1.10224	11.5758	ATATCCCTATGCCATCAGCATCTATGTTTGGTCC
SPAC26A3.16	dph1	I	3370168	426	0.244	3.11327	0.739776	7.87431	1.10224	11.5758	TCCACCCTCGACCGAAGAGCTTGCCAATATGTTG
SPAC26F1.03	pda1	I	5180673	386	0.243767	3.11327	0.361658	5.58456	1.03356	12.3568	CTATTACACTTGACGACAGTATTATCACATCTTA
SPAC26F1.03	pda1	I	5180672	387	0.243767	3.11327	0.361658	5.58456	1.03356	12.3568	TATTACACTTGACGACAGTATTATCACATCTTAT
SPAC26F1.03	pda1	I	5180823	236	0.244	3.11327	0.362004	5.58456	1.03356	12.345	CAAAGGGAGAGTTATTGGGTTTGTACGAGAAGAT
SPAC26F1.07	NA	I	5171522	325	0.244	4.6699	0.522661	8.49853	1.75977	10.8758	TTGAAAGACTTAAAGTTAGACTACTTGGATGAAT
SPAC26F1.13c	lrs1	I	5149245	302	0.243767	3.89158	0.571135	9.85233	0.755775	21.1231	CTTTTGAACGCTTGAATGGAAAGCGAGTGTTGTT
SPAC26F1.13c	lrs1	I	5149237	294	0.244	3.89158	0.571681	9.85233	0.755775	21.103	TACTACAGCTTTTGAACGCTTGAATGGAAAGCGA
SPAC26F1.13c	lrs1	I	5149437	494	0.244	3.89158	0.571681	9.85233	0.755775	21.103	CTAAGCACAGCGGTAAAAAGAGTAAGGCTGCGGC
SPAC26F1.13c	lrs1	I	5149219	276	0.243767	3.11327	0.571135	7.88187	0.755775	16.8985	TTTGTCTAAGGTCGAGTTTACTACAGCTTTTGAA
SPAC26F1.13c	lrs1	I	5149311	368	0.487534	6.22653	1.14227	15.7637	0.755775	16.8985	TTTGCGCTAGTGCTGACCGTTTGTCACGTGAAAT
SPAC26F1.13c	lrs1	I	5150846	1903	0.243767	3.11327	0.571135	7.88187	0.755775	16.8985	ATTTGCCATCTTTTGCATAGCGATGTATATGGTA
SPAC26F1.13c	lrs1	I	5151378	2435	0.244	3.11327	0.571681	7.88187	0.755775	16.8824	CAGGCCCTTACAACTTCCATGATAAAGTTTTTGA
SPAC26H5.07c	NA	I	4132422	660	1.4626	28.7977	10.35	107.598	1.2295	16.0141	TATTTCAGGTGTTGTTGCTCTTTCTATTGTTTGC
SPAC26H5.07c	NA	I	4132560	522	0.487534	6.22653	3.45	23.2644	1.2295	10.3875	TTTTGGCAATTTGGATGCTACTGATTATCCTCAT
SPAC26H5.07c	NA	I	4132316	766	0.243767	3.89158	1.725	14.5402	1.2295	12.9844	TTCTTTTTGTCGTTAGCTCAATCCGCTCGTCAAT
SPAC26H5.07c	NA	I	4132262	820	0.244	3.89158	1.72665	14.5402	1.2295	12.972	TTAATTGTTTCACTGGGTTACTCTATTGTTGTTC
SPAC26H5.07c	NA	I	4132698	384	0.243767	3.11327	1.725	11.6322	1.2295	10.3875	CTCAGCCGCCGTAGACGCTGAATCCATGGTTAGT
SPAC26H5.07c	NA	I	4132620	462	0.243767	3.11327	1.725	11.6322	1.2295	10.3875	TACCGCACCCCTTGAAGGCTCCAGCGAGGCTTAC
SPAC26H5.07c	NA	I	4132463	619	0.243767	3.11327	1.725	11.6322	1.2295	10.3875	ATGTTCCGCTATAGGCATGATCTCCTTCAAGTTC
SPAC26H5.07c	NA	I	4132343	739	0.244	3.11327	1.72665	11.6322	1.2295	10.3776	TACACTACAGGTAGTAAAGTTTTTGCTTTCTTTT
SPAC26H5.07c	NA	I	4132246	836	0.244	3.11327	1.72665	11.6322	1.2295	10.3776	GTTACTCTATTGTTGTTCCTAGTTTGGGAAGTCT
SPAC26H5.08c	bgl2	I	4134797	789	0.243767	7.00485	1.79888	30.8298	1.30418	22.0337	TGCCACGGTTGATATTGCTAGTGAATTCTTCCAA
SPAC26H5.08c	bgl2	I	4135165	421	0.243767	10.1181	1.79888	44.5319	1.30418	31.8264	ATAACAGTTGGCTCTGAAGTCTTGTACAGGAATG
SPAC26H5.08c	bgl2	I	4135164	422	0.244	6.22653	1.8006	27.4043	1.30418	19.5668	TAACAGTTGGCTCTGAAGTCTTGTACAGGAATGA
SPAC26H5.08c	bgl2	I	4135124	462	0.244	5.44822	1.8006	23.9787	1.30418	17.1209	TGCTGACGTCCTTGCCGAACGCATTTACGACGTC
SPAC26H5.08c	bgl2	I	4135273	313	0.244	3.89158	1.8006	17.1277	1.30418	12.2292	TTTTCTGCCATCCTCGGTGTTTGGCCCACTGACG
SPAC26H5.09c	NA	I	4138448	233	0.243767	3.11327	0.766046	10.0226	0.928529	13.7545	TCATTTCACTCCCTCCCAACGTCCACTACGAGGT
SPAC26H5.09c	NA	I	4137911	770	0.243767	3.11327	0.766046	10.0226	0.928529	13.7545	TCAAGGGTACGCGCGGTAGCTTTTTGAAGTTTGG
SPAC26H5.09c	NA	I	4138446	235	0.244	3.11327	0.766778	10.0226	0.928529	13.7414	ATTTCACTCCCTCCCAACGTCCACTACGAGGTCG
SPAC26H5.09c	NA	I	4137962	719	0.244	3.11327	0.766778	10.0226	0.928529	13.7414	TTATTGTGTGCTCCTCCAGCATTTCTTGTGGTTT
SPAC26H5.13c	kei1	I	4151940	464	0.244	8.56148	9.61729	85.0109	1.32804	26.421	CCATTCCCTCGTTGTTGCTTCTTATTTTCTTTGC
SPAC26H5.13c	kei1	I	4151805	599	0.243767	3.89158	9.60811	38.6413	1.32804	12.021	GCCGGGTTACTCGCTTGCTAATGAAACCTTACAT
SPAC26H5.13c	kei1	I	4152131	273	0.244	3.89158	9.61729	38.6413	1.32804	12.0095	ATCAAGCGTTCCTCATGCACTAATTCTCTTCTAT
SPAC27D7.06	etf1	I	4519145	100	0.243767	3.89158	1.2142	18.4532	0.899265	17.7527	AGTGTTTTGACGTTGCTTGAGCATCAGGGAGGGA
SPAC27D7.06	etf1	I	4519305	260	0.244	3.11327	1.21536	14.7626	0.899265	14.1886	TGAAAAAGGTTATCTACGTTGAGAATCCGTCATA
SPAC27D7.11c	NA	I	4530582	270	1.21884	34.2459	6.72464	154.277	0.519946	54.0388	TGTTGGTAATCGCTATGCTTCCGTGAGCGCCAAT
SPAC27D7.11c	NA	I	4529934	918	0.243767	3.11327	1.34493	14.0252	0.519946	24.5631	AACTCCATCACCTTCTGCTGCTGTATATCCTTTG
SPAC27D7.11c	NA	I	4530274	578	0.243767	3.89158	1.34493	17.5315	0.519946	30.7039	CTACTCCACCTCCTACTATCACTTCCACTAAGGC
SPAC27D7.11c	NA	I	4530114	738	0.243767	3.11327	1.34493	14.0252	0.519946	24.5631	CACTGTTACATCCACTCAGCCCTCTACCGTTACT
SPAC27D7.13c	ssm4	I	4536486	199	0.244	3.89158	2.3267	25.2889	0.844154	18.8936	ATATTTGTACGCGCATGCTCTTCGAATGTGATGA
SPAC27D7.13c	ssm4	I	4535930	755	0.244	3.89158	2.3267	25.2889	0.844154	18.8936	TCCTTCGCAGTAAAAACAGTATTGAAAAACCTCG
SPAC27D7.13c	ssm4	I	4536509	176	0.243767	3.11327	2.32448	20.2312	0.844154	15.1293	TTTCATGTGAGAAAGGAAAAGGGATATTTGTACG
SPAC27D7.13c	ssm4	I	4536508	177	0.243767	3.11327	2.32448	20.2312	0.844154	15.1293	TTCATGTGAGAAAGGAAAAGGGATATTTGTACGC
SPAC27D7.13c	ssm4	I	4536493	192	0.244	3.11327	2.3267	20.2312	0.844154	15.1149	AAAAGGGATATTTGTACGCGCATGCTCTTCGAAT
SPAC27D7.13c	ssm4	I	4536290	395	0.244	3.11327	2.3267	20.2312	0.844154	15.1149	CCACAAAGACAGCTACGTTTTATACTTCATCTAC
SPAC27D7.13c	ssm4	I	4536275	410	0.244	3.11327	2.3267	20.2312	0.844154	15.1149	CGTTTTATACTTCATCTACAACTGAAAATCTAGA
SPAC27D7.13c	ssm4	I	4536270	415	0.244	3.11327	2.3267	20.2312	0.844154	15.1149	TATACTTCATCTACAACTGAAAATCTAGATGAGC
SPAC27D7.13c	ssm4	I	4536185	500	0.244	3.11327	2.3267	20.2312	0.844154	15.1149	CAGATACGAGCAAATTGTCTGGGCTTGACGATAG
SPAC27E2.03c	NA	I	4006137	890	0.243767	5.44822	0.227958	6.21929	0.889515	25.1262	GTATGCTCCCTAAAATCATTGTTACTGGCTACAA
SPAC27E2.03c	NA	I	4006756	271	0.244	3.11327	0.228176	3.55388	0.889515	14.3441	TTCCTTACCGTTTTCGATATTGCTGGTCTTACCA
SPAC27E2.07	pvg2	I	4021171	1090	0.243767	8.56148	15.8108	252.353	0.796167	44.1133	TTTGACCCTGACTATTGCATTAGCCACAGTTCAA
SPAC27E2.07	pvg2	I	4020156	75	0.244	3.11327	15.8259	91.7647	0.796167	16.0259	AATAATAGTGGTATTTGCTTTCGCTGCTCTATTT
SPAC27E2.10c	rfc3	I	4034729	646	0.244	3.11327	2.83742	35.1795	0.818133	15.5956	TCCAAAGGAGATATGAGGAAAGCACTGAATATAC
SPAC27F1.02c	cdc8	I	4319981	163	0.244	3.11327	0.709132	6.29126	0.67668	18.8557	AGCGAAGCCGCCGAGTCTCAACTCGAAGAGTTAG
SPAC27F1.07	ost1	I	4329990	887	0.244	10.1181	1.54776	37.8258	1.01345	40.9174	TTACCACATCTCATATGCGAGTTGAGCCTCACCA
SPAC27F1.07	ost1	I	4329583	480	0.243767	14.0097	1.54629	52.3742	1.01345	56.709	TCTTATACTCCCTTCTGCTAAAATTGACACATAT
SPAC27F1.07	ost1	I	4329859	756	0.731301	10.1181	4.63886	37.8258	1.01345	13.6522	GTCCAACTTCGATCGTGCCAAGTGGTATATGGGA
SPAC27F1.07	ost1	I	4329188	85	1.21884	45.9207	7.73143	171.671	1.01345	37.1759	AATAGTAACGCGATTCGTACGATTGATTTACGCT
SPAC27F1.07	ost1	I	4329299	196	0.243767	6.22653	1.54629	23.2774	1.01345	25.204	CAGCAGACCTCACCTGGCGAAAGTGTCTTGTCTC
SPAC27F1.07	ost1	I	4329143	40	0.243767	3.89158	1.54629	14.5484	1.01345	15.7525	TGGTCCATCATATCTGGGCTCAGTTTAGCTGAGC
SPAC27F1.07	ost1	I	4329837	734	0.243767	3.89158	1.54629	14.5484	1.01345	15.7525	AAAACCATGCTGCCAAGCTGAAGTCCAACTTCGA
SPAC27F1.07	ost1	I	4329833	730	0.243767	3.11327	1.54629	11.6387	1.01345	12.602	TTTGAAAACCATGCTGCCAAGCTGAAGTCCAACT
SPAC27F1.07	ost1	I	4329560	457	0.244	3.11327	1.54776	11.6387	1.01345	12.59	ACTACTGATCTTCAACGCACTCGTCTTATACTCC
SPAC27F1.08	pdt1	I	4331626	288	0.244	4.6699	4.97618	65.25	0.878177	21.7939	CTCAACCGATTTAGATGCTGGTTCAAGGTTTCAA
SPAC27F1.08	pdt1	I	4331882	544	0.244	3.11327	4.97618	43.5	0.878177	14.5293	ATGCACATTCCTTTGGTAGCTGGCGTTGTAATTA
SPAC29A4.02c	NA	I	5145126	1016	0.244	5.44822	0.0875285	2.20769	0.848088	26.3284	GATGCTGCGTAGTTATTGGCGAGAACGGTGACAA
SPAC29A4.02c	NA	I	5144418	308	0.731301	9.3398	0.262335	3.78462	0.848088	15.0592	CTTTTACCAACAGTGAGCTCCCTGGCGCCTTTCG
SPAC29A4.02c	NA	I	5145042	932	0.487534	5.44822	0.17489	2.20769	0.848088	13.1768	ATTTGAAGCAACCAGTCTTCATGACCAACAATCT
SPAC29A4.02c	NA	I	5143822	5	0.731301	7.78317	0.262335	3.15385	0.848088	12.5493
SPAC29A4.05	cam2	I	5137882	103	0.243767	4.6699	1.69412	27.871	0.830859	23.0571	CATGTGGGTTCCGTTTTGAGAAGTCTCGGAATCA
SPAC29A4.05	cam2	I	5137730	255	0.244	3.89158	1.69574	23.2258	0.830859	19.1959	TATAAAAGCATTTAGAGTTTTCGACAAGGACAAT
SPAC29A4.05	cam2	I	5137883	102	0.243767	3.11327	1.69412	18.5806	0.830859	15.3714	TCATGTGGGTTCCGTTTTGAGAAGTCTCGGAATC
SPAC29A4.05	cam2	I	5137759	226	0.243767	3.11327	1.69412	18.5806	0.830859	15.3714	TTAAGGGAAACAGAATCAGAGGAAGAATATATAA
SPAC29A4.08c	prp19	I	5133432	151	0.244	4.6699	3.31468	56.0637	0.867248	22.0686	ACGTTGGAGGACTTGGTTCCTGTAAAGGTACCTG
SPAC29A4.08c	prp19	I	5134086	320	0.244	3.89158	3.31468	46.7197	0.867248	18.3905	CAACGGCATTGTATTCGCTAGATGCTGCGTTAAG
SPAC29A4.15	NA	I	5118728	149	0.244	4.6699	0.533396	11.5971	0.897012	21.3363	TTCGATTCGAACTCGACAACACTAACAAGTCGAT
SPAC29A4.15	NA	I	5118327	550	0.243767	3.89158	0.532887	9.66429	0.897012	17.7973	TTCAATCTCGCCCTAATTCAATATGGTCTTGACT
SPAC29A4.15	NA	I	5118152	725	0.243767	3.11327	0.532887	7.73143	0.897012	14.2378	CTACCTCCGAACAACCTATTTCTGCCTACCATAG
SPAC29A4.15	NA	I	5118443	434	0.244	3.11327	0.533396	7.73143	0.897012	14.2242	AGAAGAATTGTTTGTCCCATCATGAAGTTTTAAC
SPAC29A4.16	hal4	I	5116005	408	0.243767	3.89158	5.67062	89.2991	0.850479	18.771	TCCAGCAGCGCACCATGCAGAGTTGCCCTCTGGG
SPAC29A4.16	hal4	I	5115600	813	0.244	3.89158	5.67604	89.2991	0.850479	18.7531	TACTGTTTATGACGATGCAAGTCATACGCATCAA
SPAC29A4.19c	cta5	I	5107297	437	0.244	3.11327	55.833	453.931	0.857293	14.8832	TACAATGGGTTCTAATGCCGTTGGAAACCTCCGC
SPAC29B12.03	spd1	I	5412754	266	0.243767	3.11327	1.16822	15.9574	0.698918	18.2732	CTAAGCGTCCATTCGAGCAAGCAATTCCTAATTA
SPAC29B12.04	snz1	I	5415340	155	0.243767	4.6699	0.251057	7.81579	0.813283	23.5554	TGGAGCGTGTTCCTGCCGATATTCGTGCTCAGGG
SPAC29B12.04	snz1	I	5415553	368	0.244	3.89158	0.251297	6.51316	0.813283	19.6108	TCGAGAAATCCAAGTTCACTGTTCCATTTGTTTG
SPAC29B12.04	snz1	I	5415734	549	0.243767	3.11327	0.251057	5.21053	0.813283	15.7036	TATGTCTCCCGATGAGTTGTACACCTATGCCAAG
SPAC29B12.04	snz1	I	5415769	584	0.243767	3.11327	0.251057	5.21053	0.813283	15.7036	AGATTGCCGCCCCCATTGATTTGGTTAAGGAGTG
SPAC29B12.04	snz1	I	5415477	292	0.244	3.11327	0.251297	5.21053	0.813283	15.6886	CAAATTTTGGAAAGCATTGGTGTTGACTATATTG
SPAC29B12.08	clr5	I	5429144	142	0.244	4.6699	4.96877	69	0.727415	26.3109	TACAAACGCGTGTTGGCTCGATGGGGAATTCGAG
SPAC29B12.10c	pgt1	I	5433939	473	0.244	6.22653	9.30343	71.2474	0.735211	34.7092	CTTGGAGAACTTGGGTGCTTACCACCATATTTGT
SPAC29B12.10c	pgt1	I	5432857	1555	0.244	6.22653	9.30343	71.2474	0.735211	34.7092	TCTGGTAAAGATGAATGCATTCATCGGAAGCTGA
SPAC29B12.10c	pgt1	I	5432960	1452	0.244	12.4531	9.30343	142.495	0.735211	69.4184	CTATAGCATGTCAACTGCTTTGAATTTTGCTGCT
SPAC29B12.10c	pgt1	I	5432465	1947	2.9252	111.299	111.535	1273.55	0.735211	51.7517	TTTTGTTCAGCTTTTTGCTACAATCCTCGGTGGA
SPAC29B12.10c	pgt1	I	5433689	723	0.243767	3.89158	9.29455	44.5296	0.735211	21.714	ATCATCTACCGCTTATGCCACGAATATCCTGTCC
SPAC29B12.10c	pgt1	I	5432974	1438	0.243767	3.89158	9.29455	44.5296	0.735211	21.714	TATATGCCTATGTCCTATAGCATGTCAACTGCTT
SPAC29E6.06c	NA	I	4412564	1354	0.243767	3.11327	1.90657	27.7064	0.803504	15.8947	AAGGAGACCCTTTTGGCATATGTCTTAAACATTG
SPAC29E6.09	NA	I	4418304	835	0.243767	4.6699	4.04762	53.2174	0.890506	21.5127	ATAGATTACGCTACTCCACATATTAAAGAATCTA
SPAC2C4.05	NA	I	4267474	275	1.4626	50.5906	4.8503	58.2412	1.23682	27.9663	TGTCCAACACTCATATGCACGACTCTACAACCAT
SPAC2C4.05	NA	I	4267147	35	3.41274	83.2799	11.3174	95.8739	1.23682	19.7301	ATTTTACCAGCCTTATGCTTACATGTGCAAATAT
SPAC2C4.05	NA	I	4267432	233	0.243767	8.56148	0.808383	9.85619	1.23682	28.3966	TTCTCAATGTACCCATGTTGGCTTGGAACGCCAA
SPAC2C4.05	NA	I	4267339	140	0.244	3.89158	0.809156	4.48009	1.23682	12.8952	CTCGAAAACTGAACTGGTATGTACTACCAGAAAT
SPAC2C4.05	NA	I	4267404	205	0.487534	7.00485	1.61677	8.06416	1.23682	11.6168	TTATTGTCAGGTGCTTGGATCACCTTCCTTCTCA
SPAC2C4.05	NA	I	4267206	94	0.243767	3.11327	0.808383	3.58407	1.23682	10.326	ATGTACTCTGATTTGAAAGACGATTTCATAAATC
SPAC2C4.05	NA	I	4267336	137	0.244	3.11327	0.809156	3.58407	1.23682	10.3162	TGTCTCGAAAACTGAACTGGTATGTACTACCAGA
SPAC2C4.11c	rbp28	I	4279109	344	0.244	3.11327	1.23168	19.36	0.741931	17.1974	GTAAGGCTACCAAAGATCCTGGCGCTCTTCAAAA
SPAC2C4.13	vma16	I	4281934	442	0.243767	6.22653	1.6129	28.0702	1.13467	22.5113	CTCATTTGTGGTGTCTGCGTCGGTATCACAGGAA
SPAC2C4.13	vma16	I	4281957	465	0.244	14.788	1.61444	66.6667	1.13467	53.4132	TATCACAGGAAGCAGTGCTGCCCTTGCGGATGCC
SPAC2C4.13	vma16	I	4281914	422	0.243767	4.6699	1.6129	21.0526	1.13467	16.8835	TTACTGTTGGTCTCTGCAATCTCATTTGTGGTGT
SPAC2C4.13	vma16	I	4281942	450	0.244	4.6699	1.61444	21.0526	1.13467	16.8673	TGGTGTCTGCGTCGGTATCACAGGAAGCAGTGCT
SPAC2C4.15c	ubx2	I	4285975	225	0.243767	3.11327	3.21805	32.3019	0.705923	18.0919	TATTGCACCTACCAGAGAGGTTTTGGTAGACCCG
SPAC2C4.16c	rps801	I	4287398	16	0.487534	6.22653	0.137436	2.54699	0.933793	13.677	ATGGGAATTACCAGAGACTCACGACACAAGCGCT
SPAC2C4.17c	msy2	I	4290121	801	0.487534	17.9013	52.5625	763.539	0.949561	38.6684	AAATACTGCAGTGCTTGCTAAACTGCTGACTGCT
SPAC2E1P3.05c	NA	I	2935846	256	34.6149	978.344	68.4088	289.515	1.43079	19.7539	TACAATGGCCCAACTTGCTGTGAGCCAGGATCCG
SPAC2E1P3.05c	NA	I	2935984	118	0.244	10.8964	0.482212	3.22451	1.43079	31.2118	GGTATTTACTATGATGGCCCCACGTGTTGTGTAG
SPAC2E1P3.05c	NA	I	2935914	188	0.244	10.8964	0.482212	3.22451	1.43079	31.2118	CGCAATGTATCCCAGTTGATTATACAGGACCCTG
SPAC2E1P3.05c	NA	I	2935941	161	0.244	10.1181	0.482212	2.99418	1.43079	28.9824	CTTGTATCTATTCAAATCCCTGGTATTCGCAATG
SPAC2E1P3.05c	NA	I	2935929	173	3.90027	159.555	7.70803	47.216	1.43079	28.5916	CAAATCCCTGGTATTCGCAATGTATCCCAGTTGA
SPAC2E1P3.05c	NA	I	2935890	212	0.243767	9.3398	0.481752	2.76386	1.43079	26.7785	CAGGACCCTGTGCAAAGTTATATCAACAGTGCGG
SPAC2E1P3.05c	NA	I	2935931	171	0.243767	7.00485	0.481752	2.0729	1.43079	20.0839	TTCAAATCCCTGGTATTCGCAATGTATCCCAGTT
SPAC2E1P3.05c	NA	I	2935902	200	0.731301	18.6796	1.44526	5.52772	1.43079	17.8523	CAGTTGATTATACAGGACCCTGTGCAAAGTTATA
SPAC2E1P3.05c	NA	I	2935917	185	0.487534	11.6748	0.963504	3.45483	1.43079	16.7366	ATTCGCAATGTATCCCAGTTGATTATACAGGACC
SPAC2E1P3.05c	NA	I	2935903	199	1.4626	31.1327	2.89051	9.21287	1.43079	14.8769	CCAGTTGATTATACAGGACCCTGTGCAAAGTTAT
SPAC2E1P3.05c	NA	I	2935916	186	1.70637	29.576	3.37226	8.75223	1.43079	12.1141	TTCGCAATGTATCCCAGTTGATTATACAGGACCC
SPAC2E1P3.05c	NA	I	2935915	187	2.1939	36.5809	4.33577	10.8251	1.43079	11.6536	TCGCAATGTATCCCAGTTGATTATACAGGACCCT
SPAC2E1P3.05c	NA	I	2935906	196	0.487534	7.00485	0.963504	2.0729	1.43079	10.0419	ATCCCAGTTGATTATACAGGACCCTGTGCAAAGT
SPAC2E1P5.01c	mns1	I	3324109	368	0.243767	3.11327	0.845572	9.26627	0.742125	17.2094	CTTGGAACCAAGATGACGAAGAAGTTAGTGTTTT
SPAC2E1P5.01c	mns1	I	3324108	369	0.243767	3.11327	0.845572	9.26627	0.742125	17.2094	TTGGAACCAAGATGACGAAGAAGTTAGTGTTTTT
SPAC2E1P5.01c	mns1	I	3323185	1292	0.731301	9.3398	2.53672	27.7988	0.742125	17.2094	CGAGAGATGAAATATATAGAGAATGGGGATGGAA
SPAC2E1P5.01c	mns1	I	3324182	295	0.244	3.11327	0.84638	9.26627	0.742125	17.1929	CTTGATACAATGATGATTATGGGCCTTGATGAAC
SPAC2E1P5.01c	mns1	I	3323632	845	0.244	3.11327	0.84638	9.26627	0.742125	17.1929	TTTCAAGTGGTACAGTATATAGGAAAGCGTTCGA
SPAC2E1P5.03	NA	I	3327319	422	0.243767	13.2314	3.25714	65.9745	0.867868	62.5427	TCGCACACTTCGTTATGCTCGTAATCAGTTCAAA
SPAC2E1P5.03	NA	I	3327037	140	0.244	7.00485	3.26026	34.9277	0.867868	33.0792	ATGAGCTACTCGAAGTGCCTACAAAAGCCTCTAT
SPAC2E1P5.03	NA	I	3327274	377	0.243767	3.11327	3.25714	15.5234	0.867868	14.7159	CTGGTTTAGGTGCTGTGCTCGTCTTGTTGTTTCT
SPAC2E1P5.03	NA	I	3327536	639	0.731301	31.1327	9.77143	155.234	0.867868	49.0531	TTCACCAGATTCCGTTGCAAGCGTTAAAATATCT
SPAC2F3.03c	rpa49	I	3926370	889	0.243767	3.11327	1.89053	28.5587	0.618045	20.6643	TCTCGTCGTTCTGTGGGCAACCGTGAAACTTTAC
SPAC2F3.08	sut1	I	3937095	977	0.244	4.6699	17.1504	148.836	0.983466	19.4607	GGTCGTTCGCATTACTGCTTTTTGCTATCATTTC
SPAC2F3.08	sut1	I	3936316	264	0.487534	5.44822	34.268	173.642	0.983466	11.3629	ATTAATTCAGCCAATTGCTGGTATATTGTCCGAC
SPAC2F3.11	NA	I	3946652	75	0.487534	6.22653	2.8034	28	0.697893	18.3001	TGCTTCGACTGTATCGTCTGCCCCGTCTTTTAGC
SPAC2F3.12c	plp1	I	3948749	196	0.243767	3.89158	3.3871	35.5932	0.674845	23.6563	CAGGATTACAATGAACCAGAACTGCATAATAGTA
SPAC2F7.05c	NA	I	540463	848	0.243767	3.11327	0.892562	19.1613	0.723393	17.655	TTACTTCGCCTTACGTTGGGGAGTTTGAAAAGCA
SPAC2F7.10	akr1	I	552510	1500	0.487534	7.00485	78.7347	643	0.911085	15.7701	CATGTTTGTGTTAGTTGCTTCTCTAACTTTGTTT
SPAC2F7.13c	wrs1	I	560351	152	0.243767	3.89158	0.789894	12.7195	0.748449	21.3299	GCTTCGAAAAGCTAACTGGAAAGAAGCCTCATTT
SPAC2F7.13c	wrs1	I	560000	503	0.243767	3.11327	0.789894	10.1756	0.748449	17.0639	TCATGAACAGTACCTATGTTGGAGGTGCGTTTTA
SPAC2F7.13c	wrs1	I	559860	643	0.243767	3.11327	0.789894	10.1756	0.748449	17.0639	CAAGCCGCTCCTAGCTTCAGCAGCTCCTTTCCTC
SPAC2G11.09	NA	I	825397	1550	0.487534	6.22653	24.3061	178.093	1.12869	11.3153	GATGGTTATCGTCTATGCAAGGCCTGAGCTCTCG
SPAC2G11.09	NA	I	825066	1219	0.244	3.11327	12.1647	89.0467	1.12869	11.3045	CAAACTCATATTGACAGCAAATCATTGATGGGTT
SPAC2H10.02c	NA	I	5276335	500	0.244	3.89158	1.83081	16.6321	0.746262	21.372	CAGAACTTCCTACTTTCATATCTAATAATGTCAA
SPAC2H10.02c	NA	I	5276723	112	0.243767	3.11327	1.82906	13.3057	0.746262	17.1139	GACACACCTTTATTGACTGAAGACGGATTCCCAA
SPAC2H10.02c	NA	I	5276320	515	0.244	3.11327	1.83081	13.3057	0.746262	17.0976	TCATATCTAATAATGTCAATAAAACGCTGGATGT
SPAC30.04c	abc4	I	4398616	1724	0.243767	6.22653	10.1848	101.965	0.766171	33.3385	GGATTGCCTATCTTATGCGTCAAATAGTTCAAAT
SPAC30.04c	abc4	I	4397494	2846	0.244	5.44822	10.1945	89.2196	0.766171	29.1433	TATTAGCATATTCTTTGCTTGATTTTTTGAGAAC
SPAC30.04c	abc4	I	4397422	2918	0.244	3.11327	10.1945	50.9827	0.766171	16.6533	AGCTTCACGATTCTATGCTTGAAAGCGTATTCGG
SPAC30.04c	abc4	I	4397889	2451	0.244	8.56148	10.1945	140.202	0.766171	45.7966	TGTCAAGAATGGATCTGCTTTTCCCGTTACTGAT
SPAC30.04c	abc4	I	4397457	2883	0.487534	10.8964	20.3695	178.439	0.766171	29.1711	GTCTTATGACCGCGGTGCTTGGTGGGCATCAAGA
SPAC30.04c	abc4	I	4397397	2943	0.244	5.44822	10.1945	89.2196	0.766171	29.1433	CGTATTCGGTACCTTTGCCTCTTGGTTCGATAAA
SPAC30.04c	abc4	I	4399662	678	2.1939	40.4725	91.6628	662.775	0.766171	24.0778	TAACTATCAGCCTTCTGCTGAACAGGTCTGTAGT
SPAC30.04c	abc4	I	4399702	638	0.244	3.11327	10.1945	50.9827	0.766171	16.6533	TGTTCACCCCCCGTGTTTGGTATCCTTTATTTCC
SPAC30C2.02	mmd1	I	4635903	157	0.243767	3.11327	0.694989	8.41319	0.733598	17.4094	GCCGTTGATGCGATTTACAAAGCCTTTATTGATG
SPAC30C2.02	mmd1	I	4636049	303	0.243767	3.11327	0.694989	8.41319	0.733598	17.4094	ACGTCACGAAGCAGCTGAAGCCTTGGGAGCCTTG
SPAC30C2.02	mmd1	I	4636252	506	0.243767	3.11327	0.694989	8.41319	0.733598	17.4094	CTCCTCCCATGCCCGATCACGAACAAGATGTGAA
SPAC30C2.02	mmd1	I	4636379	633	0.243767	3.11327	0.694989	8.41319	0.733598	17.4094	TAACGAAGAAGCGGTGTTGGCTTTAACAGACGGT
SPAC30C2.02	mmd1	I	4636489	743	0.243767	3.11327	0.694989	8.41319	0.733598	17.4094	CTGCTCTGATTAAAGTGTTGGAAAATACTGAAGA
SPAC30C2.04	NA	I	4638585	469	0.244	3.11327	0.545426	7.77586	0.66684	19.134	TATGCTCGTATTCATTCTTACATATGTGGATTAT
SPAC30C2.05	erv14	I	4640137	155	0.243767	3.89158	2.3	34.5	1.34606	11.86	TGAATGATCTTGTAATGCCCGAAATCATATCTCA
SPAC30C2.08	NA	I	4645989	299	0.243767	3.11327	2.27861	29.5484	0.82663	15.4501	TGCCTGCTTTTTTCGTACAATTGGGAACTGTTAG
SPAC30D11.01c	gto2	I	1121386	839	0.244	7.00485	53.3009	670.95	0.941231	30.5009	CTCATGGAGTCCTTATGCTAAGTTCAAATGGAAT
SPAC30D11.01c	gto2	I	1122182	1635	0.244	3.11327	53.3009	298.2	0.941231	13.556	TCCCGAGGATTTTAATGCTACCAATACGACTGAG
SPAC30D11.06c	hfl1	I	1109140	311	0.975068	17.123	34.8571	313.133	0.844947	20.7833	GTTTGCATGGACATCTGCCTCGTCCTAGGTTATG
SPAC30D11.07	nth1	I	1107569	270	0.243767	3.11327	2.15323	19.5068	0.895317	14.2648	TATCCAAAATATTGATGAAGTTTCTCTAAATAAA
SPAC30D11.07	nth1	I	1107633	206	0.244	3.11327	2.15528	19.5068	0.895317	14.2511	TAGTACTGGGTCCTACCATGCGAAACTTAAAAGA
SPAC30D11.11	NA	I	1098539	824	0.731301	14.788	12.0453	48.5596	1.29233	15.6474	CTAACTACAAGCACATGCGTTGTGCTGCTTGCAT
SPAC30D11.11	NA	I	1098490	873	1.95014	58.3738	32.1208	191.683	1.29233	23.1623	TTCGGCACTGATAGCTGCTTCTATTATATCTGTC
SPAC30D11.11	NA	I	1098607	756	0.243767	3.89158	4.01511	12.7788	1.29233	12.3532	TTTCTTCTTACTTTCTGCAATGAAGTGTTTGGGA
SPAC30D11.11	NA	I	1098651	712	0.244	9.3398	4.01894	30.6692	1.29233	29.6194	TCATCCTGGGTTTCTTCTAACGTCTCCAATCGTA
SPAC30D11.11	NA	I	1098648	715	0.244	6.22653	4.01894	20.4462	1.29233	19.7463	TCCTGGGTTTCTTCTAACGTCTCCAATCGTATAG
SPAC30D11.11	NA	I	1098587	776	0.244	6.22653	4.01894	20.4462	1.29233	19.7463	TGAAGTGTTTGGGATGTTCGGTTATTTGGCATAC
SPAC30D11.11	NA	I	1098639	724	0.244	4.6699	4.01894	15.3346	1.29233	14.8097	TCTTCTAACGTCTCCAATCGTATAGTCCGTATTT
SPAC30D11.11	NA	I	1098647	716	0.487534	8.56148	8.03021	28.1135	1.29233	13.5885	CCTGGGTTTCTTCTAACGTCTCCAATCGTATAGT
SPAC30D11.11	NA	I	1099085	278	0.244	3.89158	4.01894	12.7788	1.29233	12.3414	CTACCATCCTAGGAAAGACCCAGGTTTCGTTTAT
SPAC30D11.11	NA	I	1098746	617	0.244	3.89158	4.01894	12.7788	1.29233	12.3414	TCCTTTCTTGGCACAATGAAACTTTCAATATATG
SPAC30D11.11	NA	I	1098678	685	0.244	3.89158	4.01894	12.7788	1.29233	12.3414	GTCTTAGCCTACTTTTATCCTTCTTCCTCATCCT
SPAC30D11.11	NA	I	1098561	802	0.244	3.89158	4.01894	12.7788	1.29233	12.3414	TGGCATACATTTTCAAGTCTTTCTAACTACAAGC
SPAC30D11.11	NA	I	1098534	829	0.244	3.89158	4.01894	12.7788	1.29233	12.3414	TACAAGCACATGCGTTGTGCTGCTTGCATGGATT
SPAC30D11.14c	NA	I	1093101	661	0.244	3.11327	3.67628	40.125	0.77224	16.5224	CCTCCACTCTATCTCCACATAGTATCGCATAACA
SPAC31A2.04c	NA	I	390931	241	0.244	3.89158	1.32479	17.4107	0.931627	17.1196	AGCCCTGAAGCTACCGCTTCCTTTACGAGAAAGC
SPAC31A2.04c	NA	I	390991	181	0.243767	3.11327	1.32353	13.9286	0.931627	13.7088	TTTGCTGAATACATTGCAGCAAATATATCTCTTT
SPAC31G5.02	NA	I	2991805	558	0.243767	7.78317	3.42647	82.2353	0.879023	36.3229	CCCTACCTCAACTATTGCCGTTAATACTATTCAA
SPAC31G5.04	lys12	I	2994107	610	0.244	3.89158	0.444915	12.0199	0.926334	17.2175	GTCATGTCTGTAACTGATGGACTTTTCCGTGAGT
SPAC31G5.05c	NA	I	2995395	329	0.244	3.11327	0.757331	10.8189	0.648496	19.6752	TCAGCCGTGCTCACGAGAAGGGTATGTTGGTAGG
SPAC31G5.14	gcv1	I	3013710	1118	0.243767	3.11327	2.20455	37.5484	0.866314	14.7423	ACAAACTCCATCCAGCCCAAGTCGTCCGCATGCC
SPAC31G5.17c	rps1001	I	3019836	249	0.975068	10.8964	0.352441	7.62203	0.782127	14.288	GTACTTACACCTCCCTGCTGAAGTTGTGCCTGCT
SPAC31G5.17c	rps1001	I	3020281	23	0.244	3.11327	0.0881944	2.17772	0.782127	16.3136	TTCCTAAGGAAAACCGCAAAGCTATTCATCAAGC
SPAC31G5.21	NA	I	3010358	272	0.244	3.11327	2.85873	21.6364	0.644679	19.7917	ATGAGCGATTGAAAACACATAAAGACAGGATTGA
SPAC31G5.21	NA	I	3010397	311	0.244	3.11327	2.85873	21.6364	0.644679	19.7917	ATAATAGACTACTGGAAAGTCAGTCGGAGCATTT
SPAC323.02c	pup2	I	3910235	97	0.243767	4.6699	1.41176	28.4331	0.915929	20.9156	ATCGAAGCCATCAAATTAGGATCCACTGCTATTG
SPAC323.07c	NA	I	3918694	1107	0.244	6.22653	7.56382	119.776	0.944581	27.0158	AATTCCCTTCGCTTTTGCTGTTGCCTCGTCAACA
SPAC323.07c	NA	I	3919245	618	0.244	3.11327	7.56382	59.8879	0.944581	13.5079	CCAAGATCCTATGGTTGCTCATTTGTGTGGTCGT
SPAC32A11.01	mug8	I	2445512	173	0.243767	3.11327	3.39028	32.2836	0.905488	14.1045	ATAGATTAACTATTGGGACAAATCCAGATAGGAA
SPAC32A11.01	mug8	I	2445712	373	0.243767	3.11327	3.39028	32.2836	0.905488	14.1045	TCCACATATAAATTATTTGATGAAGCAGAAACAC
SPAC32A11.04c	tif212	I	2444717	233	0.244	5.44822	0.238629	5.2378	0.738131	30.2504	TTGATGAATTGAAGGATATGTTCTCTAGCATGAA
SPAC32A11.04c	tif212	I	2444016	934	0.244	4.6699	0.238629	4.48954	0.738131	25.9289	AAGACTGGTTATCAAGCACAAATCGGAAAAAGAA
SPAC32A11.04c	tif212	I	2444629	321	0.243767	3.11327	0.238401	2.99303	0.738131	17.3025	TATCACTACTGAAAGCGGCGAGCTGGACTTCAGC
SPAC32A11.04c	tif212	I	2444325	625	0.243767	3.11327	0.238401	2.99303	0.738131	17.3025	CGTGAAGGCAAGAAGACTATCTTTGCCAATATTA
SPAC32A11.04c	tif212	I	2444001	949	0.244	3.11327	0.238629	2.99303	0.738131	17.2859
SPAC343.05	vma1	I	1647519	164	0.243767	3.89158	1.38496	31.6327	0.842642	18.9456	TTCGCGTTGGTCATGAAGAACTAGTTGGTGAAGT
SPAC343.09	ubx3	I	1655187	904	0.244	3.89158	1.27762	11.1081	1.44878	11.0087	CGAATGTCTCAAATGCCAGGTGGTCTTTACACTG
SPAC343.10	met11	I	1656320	82	0.244	3.11327	2.81437	38.7136	1.01945	12.5159	CCACCGAAAACCACAGTCGGTTTGGAAAATCTTT
SPAC343.12	rds1	I	1668745	675	0.243767	22.5712	2.42285	56.9172	4.92175	18.8131	CATTCCTCAATCCTTTGCTTGGTCCTTGATTGCC
SPAC343.16	lys2	I	1676006	277	0.244	5.44822	1.16188	27.4674	0.759967	29.3812	ACCATTAAGCCCAAGCATTGTATGTCTCATGACA
SPAC343.16	lys2	I	1675922	193	0.487534	8.56148	2.32154	43.163	0.759967	23.1073	CCCCAGACCATCACTGAAAAAATTGTACAAAAAT
SPAC343.16	lys2	I	1675966	237	0.243767	3.89158	1.16077	19.6196	0.759967	21.0066	TATTCCAGAAAATAAATATGTACGTTCTGGAGAT
SPAC343.16	lys2	I	1676087	358	0.244	3.89158	1.16188	19.6196	0.759967	20.9866	GTATTTGATAATCGCCAAATCGTATGTACCTTAG
SPAC343.16	lys2	I	1676000	271	0.243767	3.11327	1.16077	15.6957	0.759967	16.8053	TATGTAACCATTAAGCCCAAGCATTGTATGTCTC
SPAC343.16	lys2	I	1677164	1435	0.244	3.11327	1.16188	15.6957	0.759967	16.7893	TACTTGGCATCTCCCGCTGTTGTTGCTGCTTCAG
SPAC3A11.04	NA	I	3465927	227	0.487534	6.22653	34.8837	78.9474	0.994109	12.8472	TACCTGGCACATCTTTGCTTCAAATCAAAATGCC
SPAC3A11.04	NA	I	3465543	611	0.244	3.11327	17.4585	39.4737	0.994109	12.8349	CAAAATTGCACGGCATGCGCTGGTTCATGTATAC
SPAC3A11.04	NA	I	3465983	171	0.244	10.8964	17.4585	138.158	0.994109	44.9221	TCTCAACTTTCCAACTGCAGAGGTCAGATTGGAC
SPAC3A11.04	NA	I	3466208	104	0.244	3.89158	17.4585	49.3421	0.994109	16.0436	TATTCTACGATACCGTGATTCCTCATTCTGTAAT
SPAC3A11.07	NA	I	3457639	367	0.243767	3.11327	1.21675	16.4367	0.96044	13.2975	ATCGTTGTTTCCCCTAGAAACTATTTCTTGTTCA
SPAC3A11.07	NA	I	3457531	259	0.244	3.11327	1.21792	16.4367	0.96044	13.2848	CCTCATCAACCTTTGCCCGATCCTTCCAAAAAGA
SPAC3A11.07	NA	I	3458133	861	0.244	3.11327	1.21792	16.4367	0.96044	13.2848	ATCCTGGTATCCTGAACTTGCTGATGACTTTGCC
SPAC3A11.09	sod22	I	3452026	366	0.243767	9.3398	8.73563	88.2581	1.38431	27.6776	TACTGGCTTCATGTATGCTTTAATTCCCAGACTC
SPAC3A11.09	sod22	I	3452170	222	2.43767	69.2702	87.3563	654.581	1.38431	20.5276	CATCACCGAGGAACTTGCTCGAGTCCTTTTAGTT
SPAC3A11.09	sod22	I	3452227	165	0.243767	4.6699	8.73563	44.129	1.38431	13.8388	TTTTGGTCCTTACGTTGCAAAACTGTTTGTTCCC
SPAC3A11.09	sod22	I	3452250	142	0.243767	8.56148	8.73563	80.9032	1.38431	25.3712	ATGGCAACTGCTACGGGTCTCATTTTTGGTCCTT
SPAC3A11.10c	NA	I	3449130	767	0.731301	52.9255	15.375	165.624	2.58227	28.0264	CCACACCTGAGACCATGCATCAAGCCTTAGATGT
SPAC3A11.10c	NA	I	3449011	648	1.95014	103.516	41	323.941	2.58227	20.5561	CAACGTATTCGCCGATGCTGCGGTTGACGGAAAG
SPAC3A11.10c	NA	I	3448972	609	0.244	7.78317	5.1299	24.3564	2.58227	12.3528	TCTTGGCGTTCGCTATGCTACTCTTGCGCACAAT
SPAC3A11.12c	rpt5	I	3444685	557	0.244	3.11327	1.59018	23.1053	1.09785	11.6221	CAGAGCGTTATTCAGATATTGGTGGTTTATCAAA
SPAC3A12.07	rpb11	I	1434342	299	0.244	3.89158	3.23787	37.2	0.715964	22.2764	CTCATCTGGAAGAAATCAAAGTTAATTTTATGCG
SPAC3A12.10	rpl2001	I	1438802	428	0.244	4.6699	0.1055	2.46404	0.829209	23.0809	ATGTCAAGCAACTCCTCAACCCTCACTTGAAGTT
SPAC3A12.10	rpl2001	I	1438515	141	0.243767	3.89158	0.105399	2.05336	0.829209	19.2525	TTTCTTGAAGATGATCAACAAAGTCAAGAAGGCC
SPAC3A12.13c	NA	I	1442887	197	0.244	3.11327	1.61919	16.0976	0.833842	15.3018	AATCCTCTTCATCTAGCCAAAATGATCAAGGCTC
SPAC3A12.14	cam1	I	1445072	17	0.244	5.44822	0.583569	16.0152	1.21627	18.3584	TGACTACCCGTAACCTTACAGATGAGCAGATTGC
SPAC3A12.18	zwf1	I	1455160	134	0.244	3.89158	1.00296	13.6141	1.07646	14.8163	GTCTCCCCAAAGATATTAGAATCGTTGGCTATGC
SPAC3A12.18	zwf1	I	1455283	257	0.243767	3.11327	1.002	10.8913	1.07646	11.8643	TTGAGGAATTTAAAAAGAGATGCTCTTACTATCG
SPAC3A12.18	zwf1	I	1455423	397	0.243767	3.11327	1.002	10.8913	1.07646	11.8643	CCCGACGTTTTCGTATCTGTAGCTACAAACCTTA
SPAC3A12.18	zwf1	I	1455438	412	0.243767	3.11327	1.002	10.8913	1.07646	11.8643	TCTGTAGCTACAAACCTTAAAAAAAAATGTGTGC
SPAC3A12.18	zwf1	I	1455529	503	0.243767	3.11327	1.002	10.8913	1.07646	11.8643	CCGCCCAGGAACTCCAATCCCAATTAGCTCCCCT
SPAC3A12.18	zwf1	I	1455607	581	0.243767	3.11327	1.002	10.8913	1.07646	11.8643	AGGAGATGGTTCAAAATTTGGTTCATCTTCGTTT
SPAC3A12.18	zwf1	I	1455495	469	0.244	3.11327	1.00296	10.8913	1.07646	11.853	GTAATCGAGAAGCCATTTGGCGTCGATTTGAAAT
SPAC3C7.04	NA	I	2070788	2025	0.244	3.11327	27.697	361.846	0.905916	14.0844	GATCGCGGAAGTCTCTGCTAAAGACGAACCTGAA
SPAC3C7.08c	elf1	I	2082203	243	0.243767	3.11327	1.4038	20.1844	0.819885	15.5772	CATGATTGGTTTTGCTACTGTTATTAAAAATTTG
SPAC3C7.08c	elf1	I	2082192	254	0.243767	3.11327	1.4038	20.1844	0.819885	15.5772	TTGCTACTGTTATTAAAAATTTGGGTACGCCTTC
SPAC3C7.08c	elf1	I	2082282	164	0.487534	5.44822	2.80761	35.3227	0.819885	13.63	CTTTGAAGACTACGGGGTTTTTGGATGGCTTGGA
SPAC3C7.11c	cnx1	I	2086968	1328	0.244	9.3398	0.44437	10.988	1.4388	26.604	TGGAAAAGCAATCAATGCATGTTGACGAAGAGTC
SPAC3C7.11c	cnx1	I	2087112	1184	2.1939	57.5954	3.99552	67.7595	1.4388	18.2461	TCGAACTTTGGACTATGCAGCCCAACATCCGCTT
SPAC3C7.11c	cnx1	I	2087320	976	0.975068	23.3495	1.77578	27.4701	1.4388	16.6434	ATCATCAATCCTAAATGCATTGAAGGTGCTGGCT
SPAC3C7.11c	cnx1	I	2088109	187	0.243767	6.22653	0.443946	7.32535	1.4388	17.7529	CATGCTAAACGATTTGTAAATGGTATTGAAGAAA
SPAC3C7.11c	cnx1	I	2087800	496	0.243767	4.6699	0.443946	5.49402	1.4388	13.3147	GACAAATGTGGTGTTAATGACCGTGTTCATTTTA
SPAC3C7.11c	cnx1	I	2087577	719	0.243767	4.6699	0.443946	5.49402	1.4388	13.3147	CTGTTCTTCCTCCCGTTGAAATTTACGATCCCGA
SPAC3C7.11c	cnx1	I	2087838	458	0.244	4.6699	0.44437	5.49402	1.4388	13.302	TGTCAAACTCCATCGATTACAGAATCATGTTTGG
SPAC3C7.11c	cnx1	I	2087694	602	0.244	4.6699	0.44437	5.49402	1.4388	13.302	TGAAACCTGGTATTACAAACCTTTACACTTTAAT
SPAC3C7.11c	cnx1	I	2088147	149	0.244	3.89158	0.44437	4.57835	1.4388	11.085	AGTTTCAAGGTGCATGGTCTGAACGTTGGATTCC
SPAC3C7.11c	cnx1	I	2088108	188	0.244	3.89158	0.44437	4.57835	1.4388	11.085	ATGCTAAACGATTTGTAAATGGTATTGAAGAAAT
SPAC3C7.11c	cnx1	I	2087628	668	0.244	3.89158	0.44437	4.57835	1.4388	11.085	TTAATGGCGATGTTGTCCGTCAAGGATCTTTGTT
SPAC3C7.11c	cnx1	I	2086669	1627	0.244	3.89158	0.44437	4.57835	1.4388	11.085	ACTGAGACTGAGAAGATAGACGTTTCTTACGCTC
SPAC3C7.14c	obr1	I	2094420	470	0.487534	10.8964	0.260925	4.44294	1.87802	11.9009	CACTCATGGCTAACGTTGAGTCCATTCATGGCGG
SPAC3F10.03	grs1	I	2821729	244	0.244	3.89158	0.464552	8.06837	0.83116	19.189	CATGAAGTTTTGAAGACTAGTGGGCATGTTGATA
SPAC3F10.03	grs1	I	2821762	277	0.243767	3.11327	0.464108	6.4547	0.83116	15.3659	AAGTTTGCAGATTGGATGTGTAAGGACCCTGCTA
SPAC3F10.03	grs1	I	2821688	203	0.487534	5.44822	0.928216	11.2957	0.83116	13.4451	AAGAAAGCATGCTGGAGGTTGATTGCTCCATGCT
SPAC3F10.11c	abc2	I	2841575	128	4.87534	145.545	94.9091	1418.32	0.850102	35.1174	TTATCAGTGGATGTCTGCAGTACTTCTATGAGGT
SPAC3F10.11c	abc2	I	2838966	2737	0.244	3.89158	4.74999	37.9231	0.850102	18.7614	ACGTACTTTAAAGCGTGCTCTTTGTTTTTAATCT
SPAC3F10.11c	abc2	I	2840659	1044	0.243767	7.78317	4.74545	75.8462	0.850102	37.5587	GTCCGAATTGATTACTGCTATCTATCGCAAATCC
SPAC3F10.11c	abc2	I	2838373	3330	0.244	3.89158	4.74999	37.9231	0.850102	18.7614	GTTGTCAACTATTCGTGCTTATGACATGGAAGAT
SPAC3F10.11c	abc2	I	2841217	486	0.243767	14.0097	4.74545	136.523	0.850102	67.6057	ATTGGTATGCCTTCTAGCTGAAATCTACGTGCCT
SPAC3F10.11c	abc2	I	2841602	101	0.243767	6.22653	4.74545	60.6769	0.850102	30.047	CTTGGCTTGCTCCAAACATTTACCTTCTTATCAG
SPAC3F10.11c	abc2	I	2841618	85	0.244	3.11327	4.74999	30.3385	0.850102	15.0091	ACATTTCTATCGGCAACTTGGCTTGCTCCAAACA
SPAC3F10.11c	abc2	I	2841617	86	0.244	3.11327	4.74999	30.3385	0.850102	15.0091	CATTTCTATCGGCAACTTGGCTTGCTCCAAACAT
SPAC3F10.17	NA	I	2852413	242	0.243767	3.89158	4.51751	59.8454	0.603502	26.4529	ATTTTGATGACACTGAATATGATTACATGCAGCA
SPAC3F10.18c	rpl4102	I	2853886	32	0.244	5.44822	0.259384	3.54545	0.628414	35.5319	GGAAAAAACGCGTGCGTCGTCTCAAACGTAAAAG
SPAC3G6.03c	NA	I	5384678	223	0.243767	3.11327	2.52962	26.1622	1.00541	12.7028	ATAACTCCTTGGGAATATGCTGCTGACACTTCGG
SPAC3G6.05	NA	I	5388670	85	0.243767	3.11327	1.83728	27.6	0.70131	18.2109	ACTGCTGGTACACTGGGTGGAATATCCGATGCTG
SPAC3G9.03	rpl2301	I	3179674	206	0.243767	3.11327	0.0958685	2.75862	0.828249	15.4199	TGAAGAAGGGTAAACCCGACTTGCGTAAGAAGAT
SPAC3G9.04	ssu72	I	3176691	389	0.244	3.11327	3.41706	33.4648	0.366034	34.8582	ATCGTCGAGGTGAAACATTGAATCGACCTGTGTA
SPAC3G9.16c	bet5	I	3145650	390	0.244	7.78317	11.4255	246.316	0.999153	31.9253	TCATGTCCCTCCCAGTGCCGAGGAAGGGGGCATT
SPAC3H1.02c	NA	I	1932198	2499	0.243767	3.89158	4.15354	58.4774	0.81904	19.4915	TACCAGCTGGCTTGATCCGTCACTTCCAGTTATC
SPAC3H1.03	mug151	I	1935502	146	0.244	6.22653	0.478246	5.6448	0.811406	31.4498	CAGAGCTGGAGAAAAAGATAAAGCAATTTATAAA
SPAC3H1.03	mug151	I	1935678	322	0.243767	3.89158	0.47779	3.528	0.811406	19.6749	CCAACGGACTTTCATAAAAACGTCTATGCATCCG
SPAC3H1.03	mug151	I	1935696	340	0.243767	3.89158	0.47779	3.528	0.811406	19.6749	AACGTCTATGCATCCGCACTCTCTAAATCACAGG
SPAC3H1.03	mug151	I	1935561	205	0.244	3.11327	0.478246	2.8224	0.811406	15.7249	CATACGAGACTATCAGAAAATGAAAATTTCAGAA
SPAC3H1.03	mug151	I	1935615	259	0.244	3.11327	0.478246	2.8224	0.811406	15.7249	TTGCAGGATTTTCTGGATATTAAGGAGCCAAGAG
SPAC3H1.03	mug151	I	1935682	326	0.244	3.11327	0.478246	2.8224	0.811406	15.7249	CGGACTTTCATAAAAACGTCTATGCATCCGCACT
SPAC3H1.03	mug151	I	1935703	347	0.244	3.11327	0.478246	2.8224	0.811406	15.7249	ATGCATCCGCACTCTCTAAATCACAGGATGAAAT
SPAC3H1.03	mug151	I	1935704	348	0.244	3.11327	0.478246	2.8224	0.811406	15.7249	TGCATCCGCACTCTCTAAATCACAGGATGAAATG
SPAC3H1.03	mug151	I	1935706	350	0.244	3.11327	0.478246	2.8224	0.811406	15.7249	CATCCGCACTCTCTAAATCACAGGATGAAATGAT
SPAC3H1.03	mug151	I	1935787	431	0.244	3.11327	0.478246	2.8224	0.811406	15.7249
SPAC3H1.03	mug151	I	1935702	346	0.731301	7.78317	1.43337	7.056	0.811406	13.1166	TATGCATCCGCACTCTCTAAATCACAGGATGAAA
SPAC3H1.07	aru1	I	1944759	529	0.243767	5.44822	0.199058	5.42151	0.821026	27.2222	CCTCTCCCTGAAGAGTTTGCTTGGACCAAGAGAG
SPAC3H1.07	aru1	I	1944781	551	0.243767	5.44822	0.199058	5.42151	0.821026	27.2222	GGACCAAGAGAGTTATTGAAGAGCGTCGTCTGGC
SPAC3H1.07	aru1	I	1944693	463	0.243767	3.89158	0.199058	3.87251	0.821026	19.4444	CCTGAATCTTCTCCTTCTAAAAATCTTCATGGTT
SPAC3H1.07	aru1	I	1944279	49	0.244	3.89158	0.199248	3.87251	0.821026	19.4258	CATTTGATGTTAAGTAGATTTATGATGGGAAATG
SPAC3H1.07	aru1	I	1944742	512	0.244	3.89158	0.199248	3.87251	0.821026	19.4258	CTTTAGGATACGCCGAGCCTCTCCCTGAAGAGTT
SPAC3H1.07	aru1	I	1944487	257	0.487534	7.00485	0.398116	6.97052	0.821026	17.5	ACCAGGCTTTAATGAAAAACCCTTTATACGTTAG
SPAC3H1.07	aru1	I	1944438	208	0.243767	3.11327	0.199058	3.09801	0.821026	15.5555	CTCATCCAAAACCCCGAATTTAAAAGTCGTCCTT
SPAC3H1.07	aru1	I	1944445	215	0.243767	3.11327	0.199058	3.09801	0.821026	15.5555	AAAACCCCGAATTTAAAAGTCGTCCTTCCAAGGA
SPAC3H1.07	aru1	I	1944796	566	0.243767	3.11327	0.199058	3.09801	0.821026	15.5555	TTGAAGAGCGTCGTCTGGCTTTTATTGGATTGCG
SPAC3H1.07	aru1	I	1944459	229	0.244	3.11327	0.199248	3.09801	0.821026	15.5407	AAAAGTCGTCCTTCCAAGGAGGGTCCCAACCAGG
SPAC3H1.07	aru1	I	1944675	445	0.244	3.11327	0.199248	3.09801	0.821026	15.5407	CACGCTGACATTAACACTCCTGAATCTTCTCCTT
SPAC3H1.09c	avt3	I	1947738	1098	0.243767	7.00485	3.41003	38.563	1.07145	26.8195	GATTGGATTTTCGAGTGCTTATATTTCGTTTGTT
SPAC3H1.09c	avt3	I	1947582	1254	0.487534	8.56148	6.82007	47.1326	1.07145	16.3897	AAAACTTTCTGCTACTGCTTTAATTGCTGATGTT
SPAC3H1.09c	avt3	I	1948192	748	0.244	3.11327	3.41329	17.1391	1.07145	11.9084	AATCCTTCTTTGATTCATTCTACTGTTCCCTCTG
SPAC3H1.09c	avt3	I	1947920	956	0.244	3.11327	3.41329	17.1391	1.07145	11.9084	TTGTGGGAGTATTGTCTCATATTTGCTTCTTACT
SPAC3H1.09c	avt3	I	1947852	1024	0.244	3.11327	3.41329	17.1391	1.07145	11.9084	TTTGGTGATATTGGGGGAACTTTATATGGTCCTC
SPAC3H5.05c	rps1401	I	3436381	95	0.243767	3.89158	0.186999	3.33333	0.697575	22.8855	ATACTTTCGTTCACATCACTGATTTGACCGGCAA
SPAC3H5.05c	rps1401	I	3436666	380	0.244	3.11327	0.187178	2.66667	0.697575	18.2909	CCATTCCTACCGACTCTACCCGTAGAAAGGGTGG
SPAC3H5.05c	rps1401	I	3436385	99	0.487534	5.44822	0.373998	4.66667	0.697575	16.0199	TTTCGTTCACATCACTGATTTGACCGGCAAGGAA
SPAC3H5.07	rpl702	I	3430308	160	0.243767	4.6699	0.129493	3.6231	0.824683	23.2298	GAACTCATAGCTAAACGTGCTGAGGCTTATGAAG
SPAC3H5.07	rpl702	I	3430176	292	0.243767	3.89158	0.129493	3.01925	0.824683	19.3582	GTTGTTCGTATCCGTGGTATTAACAATATTCCTC
SPAC3H5.07	rpl702	I	3430754	5	0.487534	6.22653	0.258985	4.83079	0.824683	15.4865
SPAC3H5.07	rpl702	I	3430313	155	0.243767	3.11327	0.129493	2.4154	0.824683	15.4865	AGCGTGAACTCATAGCTAAACGTGCTGAGGCTTA
SPAC3H5.07	rpl702	I	3430013	455	0.244	3.11327	0.129616	2.4154	0.824683	15.4717	ACCACAAAACTGTTCGTGAGTTGATCTACAAACG
SPAC3H5.07	rpl702	I	3430265	203	0.487534	5.44822	0.258985	4.22694	0.824683	13.5507	GTGCTGCTGAGCGTGAGCAGATTGAACTTGCTCG
SPAC3H5.09c	NA	I	3416855	134	0.244	4.6699	109.564	952.941	0.821117	23.3084	TTGTACTGTCATACGTGCTGGGATGGCCCTTTAC
SPAC3H5.09c	NA	I	3417048	327	0.487534	6.22653	218.919	1270.59	0.821117	15.5538	TTCCAGTGCTAATGATGCACAATCGGCTGGTAAG
SPAC3H5.09c	NA	I	3417413	692	0.244	5.44822	109.564	1111.76	0.821117	27.1931	TTTACATTGACCGCCGGCAGAGCAGTCAACAGAT
SPAC3H5.10	rpl3202	I	3416024	16	0.487534	5.44822	0.186498	3.16981	0.730994	15.2875	ATGGCTGCTGTCAATATCATCAAGAAGCGCACCA
SPAC3H5.12c	rpl501	I	3411092	142	0.243767	4.6699	0.126392	3.75265	0.94132	20.3515	AAGTACAATGCTCCCAAGTACCGTTTGGTCGTTC
SPAC3H5.12c	rpl501	I	3411777	827	0.243767	4.6699	0.126392	3.75265	0.94132	20.3515	CTCAAAGGAAACTCACTGCTGAAGAGCGCAAGGA
SPAC3H8.03	img2	I	591202	136	0.244	3.11327	3.31567	26.5	0.695228	18.3527	TACAAACAACGAGGAACGAAAATTCTGACTTTAA
SPAC3H8.06	aur1	I	599049	134	2.1939	112.078	42.1439	539.044	1.3266	38.509	GGTCATGGACACATTTGCAATATGTGTTTCTAGC
SPAC3H8.06	aur1	I	599007	92	0.244	10.8964	4.68713	52.4071	1.3266	33.6632	TAAACCCTATGCCTACATTTCGTTTGCTACGCAA
SPAC3H8.06	aur1	I	599522	607	0.244	3.89158	4.68713	18.7168	1.3266	12.0226	TTCCCCTGTTCTCCTCCTTGGTATGAAAATATGT
SPAC3H8.10	spo20	I	609324	285	0.243767	4.6699	0.400279	4.45729	0.975434	19.6397	TCATTATGATGAGAAAGAAGCCGTTTCCAAATAT
SPAC3H8.10	spo20	I	609329	290	0.487534	7.00485	0.800558	6.68594	0.975434	14.7298	ATGATGAGAAAGAAGCCGTTTCCAAATATTACCC
SPAC3H8.10	spo20	I	609083	92	0.731301	10.1181	1.20084	9.65746	0.975434	14.1842	CTACACAGCAAGCTACGCTAGATAGCATGCGTTT
SPAC3H8.10	spo20	I	609131	140	0.243767	3.11327	0.400279	2.97153	0.975434	13.0931	TTGGATACACGGAAAGATTAGACGATGCCACTTT
SPAC3H8.10	spo20	I	609326	287	0.243767	3.11327	0.400279	2.97153	0.975434	13.0931	ATTATGATGAGAAAGAAGCCGTTTCCAAATATTA
SPAC3H8.10	spo20	I	609127	136	0.244	3.11327	0.400661	2.97153	0.975434	13.0806	AAACTTGGATACACGGAAAGATTAGACGATGCCA
SPAC3H8.10	spo20	I	609130	139	0.244	3.11327	0.400661	2.97153	0.975434	13.0806	CTTGGATACACGGAAAGATTAGACGATGCCACTT
SPAC3H8.10	spo20	I	609138	147	0.244	3.11327	0.400661	2.97153	0.975434	13.0806	CACGGAAAGATTAGACGATGCCACTTTATTGCGT
SPAC3H8.10	spo20	I	609905	607	0.244	3.11327	0.400661	2.97153	0.975434	13.0806	GATTATTACCCCGAAAGGATGGGCAAGTTTTATG
SPAC3H8.10	spo20	I	609140	149	2.68144	28.0194	4.40307	26.7437	0.975434	10.7126	CGGAAAGATTAGACGATGCCACTTTATTGCGTTT
SPAC458.02c	NA	I	4732668	929	0.244	5.44822	0.577664	11.8094	0.705923	31.6306	CAAATGCCGTTTCAACCGGAAATACTTCTAGTAA
SPAC458.02c	NA	I	4733515	179	0.243767	4.6699	0.577112	10.1223	0.705923	27.1378	TTCGCGCTGAATTAGACAATATTCGCAATGCTCA
SPAC458.02c	NA	I	4732737	860	0.243767	3.11327	0.577112	6.7482	0.705923	18.0919	TTACGGAAGAGATTCTTGCCTGTGAAAACTTATT
SPAC458.02c	NA	I	4732667	930	0.243767	3.11327	0.577112	6.7482	0.705923	18.0919	AAATGCCGTTTCAACCGGAAATACTTCTAGTAAA
SPAC458.02c	NA	I	4733305	292	0.244	3.11327	0.577664	6.7482	0.705923	18.0746	GAGTTGACTGCCATGAAAAAAACTGTTCCTTTCA
SPAC458.02c	NA	I	4733187	410	0.244	3.11327	0.577664	6.7482	0.705923	18.0746	AATACCTGCGTGAAATTTCTCAGTGCAATCGTAC
SPAC458.07	tfa1	I	4745968	1174	0.243767	4.6699	1.48127	16.3466	0.702266	27.2792	AACAATTCATTACCACCTATTGTTTCTACAAATG
SPAC458.07	tfa1	I	4745608	814	0.244	3.89158	1.48269	13.6221	0.702266	22.7109	GAATGGCATGCAACATCAACAATTTCTGGCTCCA
SPAC458.07	tfa1	I	4744751	126	0.243767	3.11327	1.48127	10.8977	0.702266	18.1861	TACAGATGAGCAAACAGCGCTGTTAATGGGTATC
SPAC458.07	tfa1	I	4745620	826	0.243767	3.11327	1.48127	10.8977	0.702266	18.1861	ACATCAACAATTTCTGGCTCCATTACTCGTGCTG
SPAC458.07	tfa1	I	4744739	114	0.244	3.11327	1.48269	10.8977	0.702266	18.1687	ACATTCAGCACTTACAGATGAGCAAACAGCGCTG
SPAC458.07	tfa1	I	4745165	371	0.244	3.11327	1.48269	10.8977	0.702266	18.1687	CTAAAGGCTATGTTTGTCCATTTTGCAACAAAAA
SPAC458.07	tfa1	I	4745704	910	0.244	3.11327	1.48269	10.8977	0.702266	18.1687	GTTCAAGACACTAAAACAGATATTACTTCTGAAA
SPAC458.07	tfa1	I	4745707	913	0.244	3.11327	1.48269	10.8977	0.702266	18.1687	CAAGACACTAAAACAGATATTACTTCTGAAAAGA
SPAC4A8.04	isp6	I	2546141	792	1.4626	80.9449	15.6289	340.364	1.29319	42.7959	TACCATTGCTAGCCGTGCTTATGGTGTTGCAAAG
SPAC4A8.04	isp6	I	2546126	777	0.244	5.44822	2.60731	22.9091	1.29319	17.2665	TACGCATGTTGCTGGTACCATTGCTAGCCGTGCT
SPAC4A8.04	isp6	I	2545876	527	0.244	4.6699	2.60731	19.6364	1.29319	14.7998	ATCAAGTTGTCAGCATTAAGAAACTTGAAACTCA
SPAC4A8.04	isp6	I	2546393	1044	0.975068	16.3447	10.4193	68.7273	1.29319	12.9622	AAATGAGTATGATGACGCTTGCTATTCATCTCCT
SPAC4A8.04	isp6	I	2545630	281	0.243767	3.89158	2.60482	16.3636	1.29319	12.345	TTTTGCAGCCTGATTTGAGCGAACAAGAATTCCA
SPAC4A8.11c	fas2	I	2570603	1964	0.243767	4.6699	0.715635	13.8978	0.823282	23.2693	CTCAGATTGTTGAAGGTCTCCTTGCTGGTGGTGC
SPAC4A8.11c	fas2	I	2569923	2644	0.244	4.6699	0.716319	13.8978	0.823282	23.2471	TCTGAACCAATTTATGCCAACCTTAACGGTGGTC
SPAC4A8.11c	fas2	I	2570235	2332	0.243767	3.11327	0.715635	9.26519	0.823282	15.5129	ATGGATACCCGACCCGCTCAAGTTATTTTGCCTC
SPAC4A8.11c	fas2	I	2570208	2359	0.243767	3.11327	0.715635	9.26519	0.823282	15.5129	TTGCCTCTTTCTCCCAATCACGGTACCTTTGGAA
SPAC4A8.11c	fas2	I	2572461	106	0.244	3.11327	0.716319	9.26519	0.823282	15.4981	ACGCAAGATGTAATTCTTTCTCCTCCAGTATCGG
SPAC4A8.11c	fas2	I	2571879	688	0.244	3.11327	0.716319	9.26519	0.823282	15.4981	TCGTCTTCTCTTATCTCACGAATGATTTCCTCAA
SPAC4A8.11c	fas2	I	2570390	2177	0.244	3.11327	0.716319	9.26519	0.823282	15.4981	GGAACTTGGACTACATTGTTCCTTTCGCTGCCAT
SPAC4A8.11c	fas2	I	2569011	3556	0.244	3.11327	0.716319	9.26519	0.823282	15.4981	GTTGCATCAGGTATTACAGATCCTTATGAATGCT
SPAC4A8.11c	fas2	I	2568995	3572	0.244	3.11327	0.716319	9.26519	0.823282	15.4981	CAGATCCTTATGAATGCTATAAGTATATTCACGT
SPAC4A8.15c	cdc3	I	2579161	267	0.243767	3.89158	0.28721	5.42373	0.942972	16.9298	GAAAGAGGGCATTATTTGTGTAGCTACTAAGCTT
SPAC4A8.15c	cdc3	I	2579209	219	0.487534	5.44822	0.57442	7.59322	0.942972	11.8509	ATACATCACTATTCGAGCTGAAGGACGTTCTATC
SPAC4A8.16c	tif33	I	2580297	2678	0.243767	3.11327	0.554171	7.82128	0.818522	15.6031	CTAATCCTCAGGAGAACAGACGTCGTGATAAGGG
SPAC4A8.16c	tif33	I	2582679	296	0.244	3.11327	0.5547	7.82128	0.818522	15.5882	CTGAATCCGAAGAGGATAGCGAAGTTTCTGATGA
SPAC4A8.16c	tif33	I	2582304	671	0.244	3.11327	0.5547	7.82128	0.818522	15.5882	CCGGCAGAAATCCTCCTCCGTACATCGAATTCTT
SPAC4A8.16c	tif33	I	2581872	1103	0.244	3.11327	0.5547	7.82128	0.818522	15.5882	CTATAGCCGTAACTGATTATCAACGTCTTCGCGT
SPAC4C5.03	NA	I	1197662	668	0.244	4.6699	10.5799	49.5818	1.16792	16.3871	TCCCAATGATGATGATGCAAACTCCGGGTGGATT
SPAC4C5.03	NA	I	1197250	256	0.244	16.3447	10.5799	173.536	1.16792	57.355	AGCCCTTTAACTGAATGCTGTCAAAATTACTATT
SPAC4C5.03	NA	I	1197280	286	0.244	9.3398	10.5799	99.1636	1.16792	32.7743	TATTCCAAAAAGCAATGCTTTGCTAACACAACCG
SPAC4D7.04c	NA	I	5358371	27	0.243767	3.11327	1.07432	11.8657	0.686545	18.6025	ATCAGGCTGGTTTATTCACTGTCCTCCATTACAA
SPAC4D7.04c	NA	I	5357680	560	0.244	3.11327	1.07535	11.8657	0.686545	18.5848	CAGAAGATGGTACAATCACTCCAGAAGATATAGA
SPAC4D7.05	sum1	I	5360077	711	0.243767	3.89158	0.360878	6.24684	0.851135	18.7565	TACGCCTCTTAATACTTCTAGTTTTACTCCTGTC
SPAC4D7.05	sum1	I	5359761	395	0.244	3.89158	0.361222	6.24684	0.851135	18.7386	TTCCTATTTCGGAAAGCGATGCCGCTGCTGAAAC
SPAC4D7.05	sum1	I	5359787	421	0.243767	3.11327	0.360878	4.99747	0.851135	15.0052	GCTGAAACCCCCCTTTACGTTATTACTACTCGTG
SPAC4D7.05	sum1	I	5360058	692	0.243767	3.11327	0.360878	4.99747	0.851135	15.0052	TCAAAACATACCTTACTGATACGCCTCTTAATAC
SPAC4D7.05	sum1	I	5359821	455	0.244	3.11327	0.361222	4.99747	0.851135	14.9909	AATCTAAAGCAACGGTCGCTGGATGGTCTTACTT
SPAC4D7.08c	ade4	I	5365535	425	0.243767	5.44822	1.41145	44.856	0.818004	27.3227	ACATCTTTGCTTACGAGCTTCAACGGTTGGATAA
SPAC4D7.08c	ade4	I	5365830	130	0.244	3.11327	1.4128	25.632	0.818004	15.5981	ACCGCTGGAAACAAAGGTCGTCTTTACCAATGCA
SPAC4D7.09	tif223	I	5368761	923	0.244	3.11327	1.47571	16.9477	0.729623	17.4875	CCTCACAGGAAATTAAAATTAATGCTTTAATTGC
SPAC4F10.10c	mnn9	I	4850808	512	0.243767	6.22653	3.14907	31.5642	1.17352	21.766	CTACCAGAAATACATTGCTGTTAAGCACTCTAAA
SPAC4F10.10c	mnn9	I	4850564	756	1.21884	27.2411	15.7453	138.093	1.17352	19.0453	TTTGCTTGAAGGATATGCTGAATTGCCTACTTAT
SPAC4F10.10c	mnn9	I	4850432	888	0.487534	14.0097	6.29814	71.0195	1.17352	24.4868	TGTTCATAGGGATGGCGCATTATTCCCAACCTTC
SPAC4F10.10c	mnn9	I	4850610	710	0.244	5.44822	3.15208	27.6187	1.17352	19.0271	CTCAAACCGCGCAGGAGCTTGCAAGTCACATGGA
SPAC4F10.13c	mpd2	I	4859032	818	0.244	5.44822	1.79846	28.9625	0.722084	30.9227	TATCTGCAGGTTTAACACAATCCGTGGCTTCTCC
SPAC4F10.13c	mpd2	I	4859336	514	0.244	3.11327	1.79846	16.55	0.722084	17.6701	AATTCTATAACAACGGGCACAGCTTCTCCCAAAC
SPAC4F10.13c	mpd2	I	4858964	886	0.244	3.11327	1.79846	16.55	0.722084	17.6701	CAGTCCCCACTACGCAGAGGTCCATCTCGATTTC
SPAC4F10.13c	mpd2	I	4858902	948	0.244	3.11327	1.79846	16.55	0.722084	17.6701	TTCAATGAGTATTAGAGACACTGATTCTCCACTA
SPAC4F10.15c	wsp1	I	4862691	671	0.244	3.11327	4.04367	36.7021	0.621783	20.5205	AATCAGCTGGTACACCTACCAGTACTTCTGCACC
SPAC4F10.15c	wsp1	I	4862422	940	0.244	3.11327	4.04367	36.7021	0.621783	20.5205	AAACGACCTCCTCCGCCTCCGCCTCCATCCCGTC
SPAC4F10.20	grx1	I	4874878	225	0.244	4.6699	0.267271	3.31408	1.41947	13.4832	CAATATCTTTATTCACCAAAAGCATGTTGGTGGT
SPAC4F10.20	grx1	I	4874862	209	0.243767	3.89158	0.267016	2.76173	1.41947	11.2467	GTCAACGTACCGTACCCAATATCTTTATTCACCA
SPAC4F10.20	grx1	I	4874937	284	0.243767	3.89158	0.267016	2.76173	1.41947	11.2467	AGAAGGGCGAGCTCGACTCTCTTTTTAATACTGC
SPAC4F10.20	grx1	I	4874932	279	0.244	3.89158	0.267271	2.76173	1.41947	11.236	ATTCAAGAAGGGCGAGCTCGACTCTCTTTTTAAT
SPAC4F8.07c	hxk2	I	2665982	167	0.244	8.56148	0.224919	9.75876	1.06113	33.0668	TTATCTCTACCCTTCCCACCGGCGCTGAAACTGG
SPAC4F8.07c	hxk2	I	2665820	5	0.244	5.44822	0.224919	6.21012	1.06113	21.0425
SPAC4F8.07c	hxk2	I	2665993	178	0.244	5.44822	0.224919	6.21012	1.06113	21.0425	CTTCCCACCGGCGCTGAAACTGGTGACTTCTTGG
SPAC4F8.07c	hxk2	I	2666098	283	0.244	5.44822	0.224919	6.21012	1.06113	21.0425	AAGCACAGCAAGTCCGTCTTGCCCCGTGAATGCG
SPAC4F8.07c	hxk2	I	2666592	777	0.243767	3.89158	0.224704	4.4358	1.06113	15.0447	AGCAACTGATTTCTCTTGCCTTCACTCCACTCGT
SPAC4F8.07c	hxk2	I	2665979	164	0.244	3.89158	0.224919	4.4358	1.06113	15.0303	CCTTTATCTCTACCCTTCCCACCGGCGCTGAAAC
SPAC4F8.07c	hxk2	I	2665983	168	0.244	3.89158	0.224919	4.4358	1.06113	15.0303	TATCTCTACCCTTCCCACCGGCGCTGAAACTGGT
SPAC4F8.07c	hxk2	I	2665981	166	1.4626	21.0146	1.34823	23.9533	1.06113	13.5402	TTTATCTCTACCCTTCCCACCGGCGCTGAAACTG
SPAC4F8.07c	hxk2	I	2665931	116	0.243767	3.11327	0.224704	3.54864	1.06113	12.0358	GTCAAAAGGGTTTACAAAAGAATGGTGAGGTGCT
SPAC4F8.07c	hxk2	I	2666567	752	0.244	3.11327	0.224919	3.54864	1.06113	12.0243	ATATGCTTATCAACATGGAATGGGGAGCAACTGA
SPAC4F8.14c	hcs1	I	2644088	289	0.243767	3.89158	0.402636	8.52792	0.944784	16.8974	TCTAAGTCTGTCAAAAGTGTTTTAATGCAACTTT
SPAC4F8.14c	hcs1	I	2644213	414	0.243767	3.11327	0.402636	6.82234	0.944784	13.5179	GTCTTCTGCTTGGGATGGCCGTGATGGTATAGTT
SPAC4F8.14c	hcs1	I	2643864	65	0.244	3.11327	0.403021	6.82234	0.944784	13.505	CTCCCAATCAGTATGTTGAACAAGCTGCCCTCGA
SPAC4F8.14c	hcs1	I	2644194	395	0.244	3.11327	0.403021	6.82234	0.944784	13.505	ACACAATCGATTGGATTGAGTCTTCTGCTTGGGA
SPAC4F8.14c	hcs1	I	2644561	762	0.244	3.11327	0.403021	6.82234	0.944784	13.505	CCACGCTCCTACTTGCAAACAAGTCCAAAAAGCA
SPAC4F8.15	itr1	I	2641010	417	0.243767	11.6748	5.31692	118.356	0.833221	57.4794	TGCAACATCTCTTGGTGCACTTTTAGGAGGGATA
SPAC4F8.15	itr1	I	2640068	1359	0.243767	3.11327	5.31692	31.5616	0.833221	15.3278	GATGATTGTTTACGTTGCGTCGTATGCCTCTGGA
SPAC4F8.15	itr1	I	2640989	438	0.731301	9.3398	15.9508	94.6849	0.833221	15.3278	TTTAGGAGGGATAATTGCTGGTGCCCTTGCCGAC
SPAC4G8.02c	sss1	I	757069	15	0.244	3.11327	0.612654	7.74545	0.716223	17.8147
SPAC4G8.02c	sss1	I	757001	83	0.244	3.11327	0.612654	7.74545	0.716223	17.8147	TCAAGCGTTGCGTTAAGCCTGACCGCAAAGAGTT
SPAC4G9.03	adk1	I	2256151	217	0.243767	5.44822	0.218164	6.35753	0.893292	25.0199	ACTGGTATGATCAAGGATGAGATCCTCAACAATC
SPAC4G9.03	adk1	I	2256003	69	0.243767	3.11327	0.218164	3.63288	0.893292	14.2971	TCAGGCCCCCAACATTCAGAAGAAATATGGCATC
SPAC4G9.03	adk1	I	2256033	99	0.243767	3.11327	0.218164	3.63288	0.893292	14.2971	CATCGCCCATCTTGCTACTGGTGACATGTTGCGC
SPAC4G9.03	adk1	I	2256338	404	0.243767	3.11327	0.218164	3.63288	0.893292	14.2971	GTCGTCTCGTCCATCCCGGATCTGGCCGTAGCTA
SPAC4G9.03	adk1	I	2256095	161	0.244	3.11327	0.218372	3.63288	0.893292	14.2834	GTAAAGAAGCTAAGAAGATCATGGATCAGGGTGG
SPAC4G9.09c	arg11	I	2272449	226	0.243767	5.44822	1.18926	30.1068	0.973941	22.9481	TCCATCGGAAGCCGTCGTGAAGTTGAGCAATACC
SPAC4G9.09c	arg11	I	2272458	217	0.243767	3.11327	1.18926	17.2039	0.973941	13.1132	ATTCTTTCCTCCATCGGAAGCCGTCGTGAAGTTG
SPAC4G9.09c	arg11	I	2270736	1939	0.243767	3.11327	1.18926	17.2039	0.973941	13.1132	GTCATGGCCCTACCCAACGGTGTATGCAAACCTT
SPAC4G9.09c	arg11	I	2270518	2157	0.244	3.11327	1.1904	17.2039	0.973941	13.1007	CATACTCTCTTTGATTGACGGCCAGCCCTCTATT
SPAC4G9.12	NA	I	2277215	17	0.244	3.11327	2.31173	35.2727	0.937986	13.6029	TGACTGTTACTCCCATTAATCCTACTAATCAGCC
SPAC4G9.13c	vps26	I	2278436	701	0.244	3.11327	9.55167	87.5122	0.557345	22.893	TTCAAATTATGGATGGTAATCCTAATCGTGGGGA
SPAC4G9.14	NA	I	2280650	179	0.243767	4.6699	5.50413	53.28	1.09008	17.5742	TGGACTCGTACAAACTGCTAAAGTTTCGCAATAA
SPAC4G9.14	NA	I	2280620	149	0.243767	3.11327	5.50413	35.52	1.09008	11.7161	CAGCTCTTTCTGACTTGTTAGCTCAGGCGTTGGA
SPAC4G9.14	NA	I	2280593	122	0.244	3.11327	5.50939	35.52	1.09008	11.7049	CATTGGGATTACTAAACGCGTCTTTAACAGCTCT
SPAC4G9.15	NA	I	2282557	219	5.60664	253.731	43.1408	340.26	0.567097	79.802	AATCGGTAAAGAGTATGCTACTCAATTAGCCATG
SPAC4G9.15	NA	I	2282530	192	0.244	3.89158	1.87748	5.21872	0.567097	28.1241	GGCGGTTGTTACAGGTGCTACTGATGGAATCGGT
SPAC4G9.15	NA	I	2282516	178	0.731301	34.2459	5.62706	45.9247	0.567097	82.5763	AAGAAAGGTTATTGGGCGGTTGTTACAGGTGCTA
SPAC4G9.15	NA	I	2282517	179	1.95014	77.8317	15.0055	104.374	0.567097	70.3775	AGAAAGGTTATTGGGCGGTTGTTACAGGTGCTAC
SPAC4G9.15	NA	I	2282487	149	0.244	9.3398	1.87748	12.5249	0.567097	67.4979	AAGGTGTCAAGCTGTCTGTTTACGGAGCCAAGAA
SPAC4G9.15	NA	I	2282539	201	0.243767	8.56148	1.87569	11.4812	0.567097	61.9322	TACAGGTGCTACTGATGGAATCGGTAAAGAGTAT
SPAC4G9.15	NA	I	2282495	157	0.731301	24.9061	5.62706	33.3998	0.567097	60.0555	AAGCTGTCTGTTTACGGAGCCAAGAAAGGTTATT
SPAC4G9.15	NA	I	2282423	134	0.243767	7.78317	1.87569	10.4374	0.567097	56.302	AGACGTTCTTTGCCAAAGGTGTCAAGCTGTCTGT
SPAC4G9.15	NA	I	2282501	163	0.243767	7.00485	1.87569	9.39369	0.567097	50.6718	TCTGTTTACGGAGCCAAGAAAGGTTATTGGGCGG
SPAC4G9.15	NA	I	2282425	136	1.4626	41.2508	11.2541	55.3184	0.567097	49.7334	ACGTTCTTTGCCAAAGGTGTCAAGCTGTCTGTTT
SPAC4G9.15	NA	I	2282489	151	0.244	6.22653	1.87748	8.34995	0.567097	44.9986	GGTGTCAAGCTGTCTGTTTACGGAGCCAAGAAAG
SPAC4G9.15	NA	I	2282426	137	0.975068	21.7929	7.50274	29.2248	0.567097	39.4114	CGTTCTTTGCCAAAGGTGTCAAGCTGTCTGTTTA
SPAC4G9.15	NA	I	2282403	114	0.244	5.44822	1.87748	7.30621	0.567097	39.3738	TTTTGCCAGTTTCGTTTATAAGACGTTCTTTGCC
SPAC4G9.15	NA	I	2282528	190	0.244	5.44822	1.87748	7.30621	0.567097	39.3738	TGGGCGGTTGTTACAGGTGCTACTGATGGAATCG
SPAC4G9.15	NA	I	2282421	132	0.243767	4.6699	1.87569	6.26246	0.567097	33.7812	TAAGACGTTCTTTGCCAAAGGTGTCAAGCTGTCT
SPAC4G9.15	NA	I	2282515	177	0.243767	4.6699	1.87569	6.26246	0.567097	33.7812	CAAGAAAGGTTATTGGGCGGTTGTTACAGGTGCT
SPAC4G9.15	NA	I	2282527	189	0.244	3.89158	1.87748	5.21872	0.567097	28.1241	TTGGGCGGTTGTTACAGGTGCTACTGATGGAATC
SPAC4G9.15	NA	I	2282514	176	0.975068	14.788	7.50274	19.8311	0.567097	26.7435	CCAAGAAAGGTTATTGGGCGGTTGTTACAGGTGC
SPAC4G9.15	NA	I	2282500	162	1.70637	24.9061	13.1298	33.3998	0.567097	25.7381	GTCTGTTTACGGAGCCAAGAAAGGTTATTGGGCG
SPAC4G9.15	NA	I	2282524	186	0.243767	3.11327	1.87569	4.17497	0.567097	22.5208	TTATTGGGCGGTTGTTACAGGTGCTACTGATGGA
SPAC4G9.15	NA	I	2282406	117	0.244	3.11327	1.87748	4.17497	0.567097	22.4993	TGCCAGTTTCGTTTATAAGACGTTCTTTGCCAAA
SPAC4G9.15	NA	I	2282408	119	0.244	3.11327	1.87748	4.17497	0.567097	22.4993	CCAGTTTCGTTTATAAGACGTTCTTTGCCAAAGG
SPAC4G9.15	NA	I	2282424	135	0.244	3.11327	1.87748	4.17497	0.567097	22.4993	GACGTTCTTTGCCAAAGGTGTCAAGCTGTCTGTT
SPAC4G9.16c	rpl901	I	2283975	233	0.244	5.44822	0.072693	2.34014	0.898785	24.8433	CTATCATTAACAACATGATTATCGGTGTCACCCA
SPAC4G9.16c	rpl901	I	2283909	299	0.975068	15.5663	0.290494	6.68611	0.898785	17.7622	CACATTTCCCCATCAACATTAACTTGACTGAGAA
SPAC4H3.01	NA	I	3823742	686	0.244	3.89158	2.42824	32.038	0.824089	19.3536	TTTTACATGCTATAGGTGAAGTTTATACTCAGAA
SPAC4H3.06	NA	I	3837691	213	0.244	4.6699	2.36797	43.5789	0.52499	36.4558	TCAAGCATCTCTTACTAAGGAGCTTAAACTATTG
SPAC4H3.09	NA	I	3843496	81	0.243767	3.11327	0.923706	15.0667	0.841324	15.1802	TCAACCTTTGCGATTTTATAGCGTTGCTCGCCCT
SPAC4H3.10c	pyk1	I	3846287	254	0.975068	14.788	0.168326	3.21464	0.941576	16.1072	CCAACCCTCTCTTCCCCTTGGCCATTGCCTTGGA
SPAC56E4.03	NA	I	1244618	568	0.243767	3.11327	0.860507	10.4972	0.752985	16.9611	TTACCAGAGTCTATGGATGATATTTTGACTAATT
SPAC56E4.03	NA	I	1245209	1159	0.243767	3.11327	0.860507	10.4972	0.752985	16.9611	TATATCCCTCCTGTCGCTGGTATGTTTATTTGGT
SPAC56E4.03	NA	I	1244444	394	0.244	3.11327	0.86133	10.4972	0.752985	16.9449	TGGAACATCATTATGACTACCGGTAATACTTCAT
SPAC56E4.04c	cut6	I	1251216	1720	0.243767	5.44822	2.32518	62.6976	0.832844	26.8359	ACAGGATGGCTAGATCGGCTTATTGCACAAAAAG
SPAC56E4.04c	cut6	I	1252733	203	0.243767	3.11327	2.32518	35.8272	0.832844	15.3348	ACGGAGGACACACTGTTATCACGTCTATTCTTAT
SPAC56E4.05	mug69	I	1255703	113	0.243767	5.44822	2.85222	12.2818	1.18967	18.7868	TTTTACGATTCTTTGTGCGAAGTGGTTTGAGCAA
SPAC56E4.05	mug69	I	1255809	219	2.43767	77.8317	28.5222	175.455	1.18967	26.8383	TGCCCCCAAATATGATGCTCGTGGGTCTCTGCTT
SPAC56E4.05	mug69	I	1255740	150	0.244	6.22653	2.85494	14.0364	1.18967	21.4501	TTCAAAGTTTGTTTATGCTTTTGCTTCTATATCC
SPAC56E4.05	mug69	I	1255768	178	0.243767	13.2314	2.85222	29.8273	1.18967	45.6251	ATATCCTCTGGTTTTTTACATTATCAGCTTCATC
SPAC56E4.05	mug69	I	1255712	122	0.243767	7.78317	2.85222	17.5455	1.18967	26.8383	TCTTTGTGCGAAGTGGTTTGAGCAAGTTTTCAAA
SPAC56E4.05	mug69	I	1255713	123	0.243767	7.78317	2.85222	17.5455	1.18967	26.8383	CTTTGTGCGAAGTGGTTTGAGCAAGTTTTCAAAG
SPAC56E4.05	mug69	I	1255769	179	0.243767	7.00485	2.85222	15.7909	1.18967	24.1544	TATCCTCTGGTTTTTTACATTATCAGCTTCATCG
SPAC56E4.05	mug69	I	1255754	164	0.244	3.89158	2.85494	8.77273	1.18967	13.4063	ATGCTTTTGCTTCTATATCCTCTGGTTTTTTACA
SPAC56E4.05	mug69	I	1255796	206	1.21884	16.3447	14.2611	36.8455	1.18967	11.2721	TTCATCGTGCAGCTGCCCCCAAATATGATGCTCG
SPAC56E4.05	mug69	I	1256108	460	0.243767	3.11327	2.85222	7.01818	1.18967	10.7353	CTAAATCAGCCTCCTCAACAGCAACAGCAACAGC
SPAC56E4.06c	ggt2	I	1257687	713	0.244	10.1181	7.50104	78	1.53807	26.9608	GGCAGCCTATCCTTATGCCAAATGGGAAAGTACT
SPAC56E4.06c	ggt2	I	1257483	917	1.21884	30.3544	37.4694	234	1.53807	16.1919	TTTTCGCGGATGCTCTGCATACATCCTACAGAGG
SPAC56E4.06c	ggt2	I	1257488	912	0.731301	21.0146	22.4816	162	1.53807	18.683	AACGGTTTTCGCGGATGCTCTGCATACATCCTAC
SPAC56E4.06c	ggt2	I	1258167	233	0.243767	4.6699	7.49388	36	1.53807	12.4553	CAGGTCATAAAGTTAGAGGAAGGCGAGGTGCCGT
SPAC56E4.07	NA	I	1259476	112	0.244	3.11327	3.16373	40.4571	0.732415	17.4208	GACAGTGCGACTTGGAAATGGAGGTTCAAAGGAA
SPAC56E4.07	NA	I	1259572	208	0.244	3.11327	3.16373	40.4571	0.732415	17.4208	CATGTAACTTGCATAGTCGCGTATACCGATTCCA
SPAC56F8.03	NA	I	1131411	1864	0.243767	5.44822	1.29912	26.8402	0.734227	30.4403	TGGCATTCCATAAAGGACAACGCAATCCAAGATT
SPAC56F8.03	NA	I	1131035	1488	0.243767	3.89158	1.29912	19.1716	0.734227	21.7431	TCATGTTGATACTGGCAAAACTAAATTGCTTGAT
SPAC56F8.03	NA	I	1129711	164	0.244	3.89158	1.30036	19.1716	0.734227	21.7223	TTTCCTCAGAGAAAACCACGTCAAAGAAAAAGAA
SPAC56F8.03	NA	I	1129898	351	0.243767	3.11327	1.29912	15.3373	0.734227	17.3945	GTCAAAGAAGGTTGAGGAAGATGATGAACCTCAG
SPAC56F8.03	NA	I	1130985	1438	0.243767	3.11327	1.29912	15.3373	0.734227	17.3945	TCGAATGTATCTGAGTCTGATCTTCGTTCACCAA
SPAC56F8.03	NA	I	1131738	2191	0.243767	3.11327	1.29912	15.3373	0.734227	17.3945	ATTGATGTTATTTTGTCAAACGGTGTCCTACACG
SPAC56F8.04c	ppt1	I	1134029	278	0.243767	3.11327	3.84043	52.8293	0.851939	14.9911	CATGGTCAATTCTTATGGCCGCTTATGCATACGA
SPAC56F8.05c	mug64	I	1135548	255	0.243767	5.44822	0.433753	10.7625	0.81153	27.5407	AAATTTCCGCGATTCTATTACGGATTTTGGTAAA
SPAC56F8.05c	mug64	I	1135035	521	0.243767	3.89158	0.433753	7.6875	0.81153	19.6719	TACAAGGGGAGCGCGATTCAGCTATTAGCAAGAA
SPAC56F8.05c	mug64	I	1135746	101	0.243767	3.11327	0.433753	6.15	0.81153	15.7375	ATTTGCGTACAAAAATTGGATCAAGAGTCGAGGA
SPAC56F8.05c	mug64	I	1135738	109	0.487534	6.22653	0.867506	12.3	0.81153	15.7375	ACAAAAATTGGATCAAGAGTCGAGGAATTATCTC
SPAC56F8.05c	mug64	I	1135546	257	0.243767	3.11327	0.433753	6.15	0.81153	15.7375	ATTTCCGCGATTCTATTACGGATTTTGGTAAAAC
SPAC56F8.06c	alg10	I	1137139	591	0.244	3.89158	15.2191	119.464	1.13066	14.106	AGCTGAAGCAACTTTTGCTGATGTTCTTCTTACT
SPAC56F8.06c	alg10	I	1137187	543	0.243767	3.11327	15.2045	95.5714	1.13066	11.2956	TGCAGTTACATATTTTGCTAGCAATATGTCTTTC
SPAC56F8.06c	alg10	I	1137153	577	0.243767	3.11327	15.2045	95.5714	1.13066	11.2956	TTCAATCCCCACTTAGCTGAAGCAACTTTTGCTG
SPAC56F8.07	NA	I	1138740	175	0.244	8.56148	2.79054	19.7143	1.73149	20.2647	TTAAGCTGTCTTTCTGGTTTGCGACGCTTTTATT
SPAC56F8.07	NA	I	1138833	268	0.244	7.00485	2.79054	16.1299	1.73149	16.5802	TCTTCAGAACTTTTCTTTCAAGTTCCTTTTTTTA
SPAC56F8.07	NA	I	1138779	214	0.243767	6.22653	2.78788	14.3377	1.73149	14.752	ACATATGAAGACCCTATTCTTTTAATCCCTGCGC
SPAC56F8.11	spc3	I	1145936	204	0.731301	8.56148	18.6	73.0714	0.874342	13.3897	TGTCCGTCAGCAGTATGCCCAAGTCAAATTCAAC
SPAC56F8.11	spc3	I	1145647	106	0.487534	6.22653	12.4	53.1429	0.874342	14.607	CAAGGCGTAATTCAGCGTAGAGAAGTGGAGTTAG
SPAC56F8.15	NA	I	1152363	296	0.244	5.44822	40.8852	247.8	0.6118	36.4968	TCACTCTCCCTTTGATGCCATTTTTGGAGAAAAC
SPAC57A10.02	cdr2	I	1366563	1718	0.244	3.11327	16.41	202.435	0.857993	14.8711	CTCGTCGTCTTCGTACCCCTAGTGGGGAGAGATC
SPAC57A10.10c	sla1	I	1382977	460	0.243767	3.11327	0.458355	6.55942	0.595566	21.4443	AAGAGCGTCATGGAAAGAAGTGTCTACTGCAAAG
SPAC57A7.04c	pabp	I	1543348	484	0.244	5.44822	0.122018	2.93587	0.743556	30.0297	CAACGTGACCCATCCTTGCGTAAAATGGGTACTG
SPAC57A7.04c	pabp	I	1543052	188	0.487534	6.22653	0.243802	3.35528	0.743556	17.1762	AGTCTACCTCTACCCCTACTAATGCTAGTTCGGT
SPAC57A7.04c	pabp	I	1543898	1034	0.487534	5.44822	0.243802	2.93587	0.743556	15.0292	ATGAGCGCGAAGAGGAGCTTCGTAAGCGTTATGA
SPAC57A7.09	NA	I	1526013	135	0.731301	18.6796	49.3676	373	1.5986	15.9783	GGCCAGTACAGATGTTGCCATTCAGCTGCCGGAC
SPAC57A7.10c	sec21	I	1522932	1177	0.243767	3.11327	2.30144	30.2	0.851955	14.9908	ATGTCCGATATTTCAGATAATTTCAAAATTATCG
SPAC57A7.10c	sec21	I	1522378	623	0.244	3.11327	2.30364	30.2	0.851955	14.9765	ACACACCAAATGCCAGCGGCATTTCTCAATATCA
SPAC57A7.12	NA	I	1516484	304	0.243767	4.6699	0.395397	8.64183	0.772804	24.7892	TCTCATGATGAATTGACACTTCATCACTGTCATT
SPAC57A7.12	NA	I	1516549	239	0.243767	3.89158	0.395397	7.20152	0.772804	20.6577	CTCGCGGACAACTTGTTCGAAATGCTGATAACTC
SPAC57A7.12	NA	I	1516408	380	0.244	3.89158	0.395775	7.20152	0.772804	20.638	AGATCACTGTTCAAGAGGACGAAGAATCTGATCC
SPAC57A7.12	NA	I	1516524	264	0.243767	3.11327	0.395397	5.76122	0.772804	16.5262	TGATAACTCAGTAACTAACTTCCGTGATTTGCTT
SPAC57A7.12	NA	I	1515814	974	0.243767	3.11327	0.395397	5.76122	0.772804	16.5262	GCATTAACCGCCTTCGTTATGACCTTGCAGCAAG
SPAC57A7.12	NA	I	1516537	251	0.244	3.11327	0.395775	5.76122	0.772804	16.5104	TTGTTCGAAATGCTGATAACTCAGTAACTAACTT
SPAC57A7.12	NA	I	1516525	263	0.244	3.11327	0.395775	5.76122	0.772804	16.5104	CTGATAACTCAGTAACTAACTTCCGTGATTTGCT
SPAC57A7.12	NA	I	1516355	433	0.244	3.11327	0.395775	5.76122	0.772804	16.5104	GCTCATGAGGCTAGTGTCCGTCACTTACGCCGTC
SPAC57A7.12	NA	I	1516328	460	0.244	3.11327	0.395775	5.76122	0.772804	16.5104	CGCCGTCTTACTGAGTCTGCTGAGGACTTTTTGG
SPAC589.06c	NA	I	3103228	348	6.58171	236.608	7.97817	99.6963	1.53143	23.4744	TTTGTATATGGGTTATGCTCAACCATTGGTGATT
SPAC589.06c	NA	I	3103105	471	0.243767	7.78317	0.295488	3.27948	1.53143	20.849	TCCATTTGCTCCCCCTGCTGGTCTCTTTGGGGGA
SPAC589.06c	NA	I	3103411	165	0.243767	6.22653	0.295488	2.62359	1.53143	16.6792	CCAAGCTCGTATTAATGCCAACAATGATGAGACT
SPAC589.06c	NA	I	3103075	501	0.243767	5.44822	0.295488	2.29564	1.53143	14.5943	GGGAGGAAACAAGCCTGCAGCTGCTGTTACTGGC
[truncated: 3,295 more rows]
