# Supplementary material for: Regulated Ire1-dependent mRNA decay requires no-go mRNA degradation to maintain endoplasmic reticulum homeostasis in S. pombe
Source: eLife journal article supplement (doi:10.7554/elife.29216), 2017-09-25
Supplement: supp [file elife-29216-supp-v2.zip › elife_poa_e29216_Supplementary_File_3.xlsx]

## Sheet: Sheet1
strain	genotype	organism
wildtype	h+; ura4-D18 +ade6-M216+leu1-32	S.pombe
dom34Δ	h+;dom34Δ::natMX6 + ura4-D18 +ade6-M216+leu1-32	S.pombe
hbs1Δ	h+;hbs1Δ::kanMX6 + ura4-D18 +ade6-M216+leu1-32	S.pombe
ski7Δ	h+;ski7Δ::kanMX6 + ura4-D18 +ade6-M216+leu1-32	S.pombe
ski2Δ	h+;ski2Δ::kanMX6 + ura4-D18 +ade6-M216+leu1-32	S.pombe
dom34Δ/ski2Δ	h+;dom34Δ::natMX6 ski2Δ::kanMX6 + ura4-D18 +ade6-M216+leu1-32	S.pombe
wildtype	BY4741: MATa; his3Δ1 leu2Δ0 lys2Δ0 ura3Δ0	S.cerevisiae
ire1Δ	BY4741: MATa; kanΔ::kanM6X his3Δ1 leu2Δ0 lys2Δ0 ura3Δ0	S.cerevisiae
dom34Δ	BY4741: MATa; dom34Δ::kanM6X his3Δ1 leu2Δ0 lys2Δ0 ura3Δ0	S.cerevisiae
hbs1Δ	BY4741: MATa; hbs1Δ::kanM6X his3Δ1 leu2Δ0 lys2Δ0 ura3Δ0	S.cerevisiae
ski7Δ	BY4741: MATa; ski7Δ::kanM6X his3Δ1 leu2Δ0 lys2Δ0 ura3Δ0	S.cerevisiae
ski2Δ	BY4741: MATa; ski2Δ::kanM6X his3Δ1 leu2Δ0 lys2Δ0 ura3Δ0	S.cerevisiae
Plasmid	description	marker
pPK001	pJK148::pNda2::Gas2::Nda2 3′UTR	Leu1
